# Supplementary material for: The Prevalence and Causes of Visual Impairment in Type 2 Diabetes Mellitus in Northeast China
Source: J Ophthalmol. 2020 Nov 29;2020:5969816. doi: 10.1155/2020/5969816 (PMC7719542; doi:10.1155/2020/5969816)
Supplement: Supplementary Materials — (1) Dataset. [file 5969816.f1.zip]

Archive with 2 entries (2 files):
- additional file 1.xls
- Table 3 Causes of Blindness and Low Vision According to Presenting Visual Acuity.docx
