# Supplementary material for: The Prevalence and Causes of Visual Impairment in Type 2 Diabetes Mellitus in Northeast China
Source: J Ophthalmol. 2020 Nov 29;2020:5969816. doi: 10.1155/2020/5969816 (PMC7719542; doi:10.1155/2020/5969816)
Supplement: Supplementary Materials — (1) Dataset. [file 5969816.f1.zip › additional file 1.xls]

## Sheet: Sheet
medid	SEX	BIRTH	DRDU	WEIGHTKG	HEIGHTCM	HIPSCM	WAISTCM	PRESENTING visual r	PRESENTING visual l	CAUSES	AUTOSPHR	AUTOCYLR	AUTOAXR	AUTOSPHL	AUTOCYLL	AUTOAXL	LEVELR	HMAR	HER	SER	IRMAR	VENLOOPR	VBR	NVDR	NVER	FPR	PRHVHR	MACEDR	PCSCARR	CTRR	FOCRXR	LEVELL	HMAL	HEL	SEL	IRMAL	VENLOOPL	VBL	NVDL	NVEL	FPL	PRHVHL	MACEDL	PCSCARL	CTRL	FOCRXL
1	1	19380225	1	77.5	169	110	101	0.5	0.18		0.25	-2.5	94	0	-1	55	10	0	0	0	0	0	0	0	0	0	0	0	0	0	0	10	0	0	0	0	0	0	0	0	0	0	0	0	0	0
2	2	19600528	12	64	150	102.5	99.4	0.32	0.06		0.75	-2.25	78	0.5	-1.25	100	10	0	0	0	0	0	0	0	0	0	0	0	0	0	0	10	0	0	0	0	0	0	0	0	0	0	0	0	0	0
3	2	19400602	10	87	152.8	117.5	117.5	0.58	0.4		3	-3.5	20	2.25	-3	179	10	0	0	0	0	0	0	0	0	0	0	0	0	0	0	10	0	0	0	0	0	0	0	0	0	0	0	0	0	0
4	1	19530315	12	65.5	171	95	94	-0.14	0.04		0	0.75	8	0.5	-1.25	85	37	2	2	0	0	0	0	0	0	0	0	0	0	0	0	20	2	0	0	0	0	0	0	0	0	0	0	0	0	0
5	1	19630613	8	74.5	160.5	105	100.5	-0.04	-0.1		1.25	-1.5	72	0	1	20	37	2	2	0	0	0	0	0	0	0	0	0	0	0	0	37	2	2	0	0	0	0	0	0	0	0	0	0	0	0
6	2	19401211	10	71	165.8	95	92	0.16	0.12		0	2.25	14	1	-1.5	79	37	2	2	0	0	0	0	0	0	0	0	0	0	0	0	31	2	0	0	0	0	0	0	0	0	0	0	0	0	0
7	2	19490321	31	90	160	112	114.8	0.02	0		2	-2.25	90	2	-2.75	91	15	2	0	0	0	0	0	0	0	0	0	0	0	0	0	15	2	0	0	0	0	0	0	0	0	0	0	0	0	0
8	2	19460404	0	68	156.6	99.5	95	0.2	0.14		0	0.5	8	-0.25	-0.25	123	10	0	0	0	0	0	0	0	0	0	0	0	0	0	0	10	0	0	0	0	0	0	0	0	0	0	0	0	0	0
9	2	19380825	20	69	156.2	104.5	105.7	0.42	0.28		0	-0.5	84	0.5	-1	97	88	8	8	8	8	8	8	8	8	8	8	8	8	8	8	88	8	8	8	8	8	8	8	8	8	8	8	8	8	8
10	2	19430919	4	62	156.7	96.5	92	0.58	0.7	myopic	2.75	1.75	178	3.5	1	1	10	0	0	0	0	0	0	0	0	0	0	0	0	0	0	10	0	0	0	0	0	0	0	0	0	0	0	0	0	0
11	2	19580120	6	63.5	146.5	100.5	101.5	0.14	0.1		0.25	0.5	179	0.25	0.75	5	20	2	0	0	0	0	0	0	0	0	0	0	0	0	0	20	2	0	0	0	0	0	0	0	0	0	0	0	0	0
12	2	19441102	7	60	156.2	94.5	95.8	0.2	0.04		1	-2	105	1	-1.5	71	10	0	0	0	0	0	0	0	0	0	0	0	0	0	0	10	0	0	0	0	0	0	0	0	0	0	0	0	0	0
13	1	19630110	10	83.5	181.2	101.5	99.5	-0.12	-0.12		-1	-0.25	98	-0.75	-1	79	31	2	0	1	0	0	0	0	0	0	0	0	0	0	0	37	2	0	2	0	0	0	0	0	0	0	0	0	0	0
14	2	19421116	30	56.5	154.2	92.5	91	0.2	0.2		0.5	-3	88	0.25	-2	70	31	2	0	0	0	0	0	0	0	0	0	0	0	0	0	20	2	0	1	0	0	0	0	0	0	0	0	0	0	0
15	2	19431204	14	56	156.5	96	94.6	0.1	0.12		0.5	0.5	157	0.75	1.25	4	47	2	2	0	0	0	2	0	0	0	0	0	0	0	0	37	2	0	2	0	0	0	0	0	0	0	0	0	0	0
16	1	19420609	13	72	173.4	100.5	93.2	0.1	0.2		0	-1	129	0.75	-2.5	1	15	2	0	0	0	0	0	0	0	0	0	0	0	0	0	31	2	0	0	0	0	0	0	0	0	0	0	0	0	0
17	2	19621002	10	69	171.2	93.5	93.3	-0.06	-0.14		-0.25	-0.75	76	0	-0.5	95	15	2	0	0	0	0	0	0	0	0	0	0	0	0	0	10	0	0	0	0	0	0	0	0	0	0	0	0	0	0
18	2	19651113	5	76	158	103	102	0	-0.06		0.25	-1.5	89	-0.25	-0.5	110	37	2	2	0	0	0	0	0	0	0	0	2	0	0	0	43	3	2	2	0	0	0	0	0	0	0	2	0	0	0
19	2	19591217	11	45.1	148.6	89	77.3	0.02	-0.02		-0.25	-1	89	-0.25	-1	107	10	0	0	0	0	0	0	0	0	0	0	0	0	0	0	20	2	0	0	0	0	0	0	0	0	0	0	0	0	0
20	2	19401215	2	71	153.6	107.5	102.3	0.1	0.04		-0.75	-0.25	146	0	0.5	122	10	0	0	0	0	0	0	0	0	0	0	0	0	0	0	20	2	0	0	0	0	0	0	0	0	0	0	0	0	0
21	1	19580913	4	65.1	164.5	102.5	98.5	0.08	0.1		1	-2	97	1	-2.5	81	43	4	0	2	0	0	0	0	0	0	0	0	0	0	0	37	2	0	2	0	0	0	0	0	0	0	0	0	0	0
22	2	19500712	6	85	157.5	120	110	1.7	0.2		-8.5	-3.5	19	-2	-1.25	121	20	2	0	0	0	0	0	0	0	0	0	0	0	0	0	10	0	0	0	0	0	0	0	0	0	0	0	0	0	0
23	1	19350626	10	70	155.5	104	98.3	0.96	1.7	myopic	-3.5	-0.5	88	-0.5	-1.5	42	85	8	8	8	8	8	8	8	8	8	3	8	8	8	8	85	8	8	8	8	8	8	8	8	8	3	8	8	8	8
24	2	19411116	1	55	148.3	93.5	87	1.7	0.52	cataract				2.75	-3	109	88	8	8	8	8	8	8	8	8	8	8	8	8	8	8	88	8	8	8	8	8	8	8	8	8	8	8	8	8	8
25	2	19360420	10	56.5	151.5	97.5	98.5	1.7	0.6	myopic				-0.25	-3.5	104	88	8	8	8	8	8	8	8	8	8	8	8	8	8	8	10	0	0	0	0	0	0	0	0	0	0	0	0	0	0
26	1	19550125	3	68	167	97	92.5	-0.02	0.02		0.5	0.75	10	0.25	1.5	14	20	2	0	0	0	0	0	0	0	0	0	0	0	0	0	13	1	0	0	0	0	0	0	0	0	0	0	0	0	0
27	2	19570616	3	65.5	153	94	91.5	-0.02	0.06		0.5	1.25	2	0.5	0.75	174	37	2	0	2	0	0	0	0	0	0	0	0	0	0	0	37	2	2	0	0	0	0	0	0	0	0	0	0	0	0
28	2	19360122	2	64.5	147	107	100	0.56	1.2	myopic	1.75	-4.5	84	0.25	-3	95	31	2	0	0	0	0	0	0	0	0	0	0	0	0	0	31	2	0	0	0	0	0	0	0	0	0	0	0	0	0
29	2	19571129	7	50.2	157.7	93	83.5	-0.06	0.1		-0.5	-0.5	39	-1	-0.25	160	47	5	2	2	2	0	0	0	0	0	0	3	0	2	0	53	5	2	2	2	0	2	0	0	0	0	0	0	0	0
30	2	19471108	4	52.5	157.6	90.5	85	0.06	0.1		0.25	-1.5	69	-0.5	-0.75	85	10	0	0	0	0	0	0	0	0	0	0	0	0	0	0	10	0	0	0	0	0	0	0	0	0	0	0	0	0	0
31	1	19371228	10	72.5	161.5	104	101	0.1	0.06		-1	-1.25	106	-3	-0.75	118	10	0	0	0	0	0	0	0	0	0	0	0	0	0	0	15	2	0	0	0	0	0	0	0	0	0	0	0	0	0
32	1	19420117	20	69	171	97	92	0.14	0.12		0.75	-1.5	42	-0.5	-2	57	43	3	0	2	0	0	0	0	0	0	0	1	0	0	0	37	2	0	2	0	0	0	0	0	0	0	0	0	0	0
33	2	19521230	13	45.2	158	89	83	-0.06	-0.1		0.25	0.5	10	0.5	0	0	37	2	2	1	0	0	0	0	0	0	0	0	0	0	0	37	2	2	0	0	0	0	0	0	0	0	3	0	3	0
34	2	19420311	7	72	160.3	108.5	105.3	0.4	0.82		-2.5	-2.5	97	-4.5	-4.25	99	10	0	0	0	0	0	0	0	0	0	0	0	0	0	0	10	0	0	0	0	0	0	0	0	0	0	0	0	0	0
35	2	19541213	20	64	162.5	98.5	97.7	0.1	-0.04		0.75	-1.25	61	0.25	-1	108	37	2	2	2	0	0	0	0	0	0	0	0	0	0	0	37	2	2	0	0	0	0	0	0	0	0	0	0	0	0
36	2	19560504	2	61	154.6	95.5	92	0.24	0.28		-1.75	-0.25	25	-2	-0.25	91	20	2	0	0	0	0	0	0	0	0	0	0	0	0	0	20	2	0	0	0	0	0	0	0	0	0	0	0	0	0
37	1	19430317	7	64.5	166.5	91.5	91	0.08	1.7		0	-0.25	95	-0.75	-2.25	93	31	2	0	0	0	0	0	0	0	0	0	0	0	0	0	88	8	8	8	8	8	8	8	8	8	8	8	8	8	8
38	2	19310127	10	66.5	158.6	105.5	99	0.22	0.14		1.75	-2.25	95	1	-1.25	95	88	8	8	8	8	8	8	8	8	8	8	8	8	8	8	88	8	8	8	8	8	8	8	8	8	8	8	8	8	8
39	2	19400914	6	64	151.3	103.5	92.5	0.6	0.4		-3.25	-3.25	69	-2.25	-1.25	54	10	0	0	0	0	0	0	0	0	0	0	0	0	0	0	88	8	8	8	8	8	8	8	8	8	8	8	8	8	8
40	2	19301123	20	66	152.5	104	102.2	0.24	0.38		2	0.5	4	2	1.5	178	88	8	8	8	8	8	8	8	8	8	8	8	8	8	8	88	8	8	8	8	8	8	8	8	8	8	8	8	8	8
41	2	19381102	2	68	148.5	103.5	105.5	0.02	0.18					0.5	1.25	176	10	0	0	0	0	0	0	0	0	0	0	0	0	0	0	10	0	0	0	0	0	0	0	0	0	0	0	0	0	0
42	2	19370424	20	55.5	154.5	97.5	87.7	0.2	0.12		-0.25	-2.5	78	-1.25	-0.5	124	37	2	0	2	0	0	0	0	0	0	0	0	0	0	0	31	2	0	0	0	0	0	0	0	0	0	0	0	0	0
43	1	19610308	30	55	160	93	85	1.7	1.4	PDR				-3	-0.75	71	85	8	8	8	8	8	8	8	8	8	3	8	8	8	8	75	6	2	2	1	0	3	3	1	1	3	3	0	2	0
44	2	19490828	12	62.5	162	99	91.5	-0.04	0.02		1.5	2	167	1.25	1.75	180	10	0	0	0	0	0	0	0	0	0	0	0	0	0	0	10	0	0	0	0	0	0	0	0	0	0	0	0	0	0
45	2	19480213	9	69	156.5	105	102	-0.18	0.04		1	-1.5	85	0.5	1	173	31	2	0	0	0	0	0	0	0	0	0	0	0	0	0	31	2	0	0	0	0	0	0	0	0	0	0	0	0	0
46	2	19481102	28	63	151	102	97.5	0.26	0.36		0	-2.75	74	0	-2.75	95	37	2	2	2	1	0	0	0	0	0	0	0	0	0	0	37	2	2	0	1	2	0	0	0	0	0	0	0	0	0
47	2	19360125	8	62.5	153	107	100	0.2	1.7		1	-3.25	65	0	2	55	88	8	8	8	8	8	8	8	8	8	8	8	8	8	8	88	8	8	8	8	8	8	8	8	8	8	8	8	8	8
48	2	19470327	30	56	154.3	93	92.2	0.34	0.26		-4.25	-0.25	39	-3.25	-1	74	37	2	2	0	0	0	0	0	0	0	0	0	0	0	0	37	2	2	0	0	0	0	0	0	0	0	0	0	0	0
49	2	19510520	10	57	157.5	95	91.4	0.06	0.12		0.75	-1.5	95	1.75	-2.5	79	10	0	0	0	0	0	0	0	0	0	0	0	0	0	0	10	0	0	0	0	0	0	0	0	0	0	0	0	0	0
50	2	19540110	25	58.5	159	94	86.4	0.12	0		1.25	-1.5	84	0.75	-1.25	100	43	2	0	2	2	0	0	0	0	0	0	0	0	0	0	53	3	0	0	4	0	0	0	0	0	0	0	0	0	0
51	1	19630916	5	70	172	98	96.5	0	0.04		-1.5	-0.25	60	-1.5	-0.25	96	10	0	0	0	0	0	0	0	0	0	0	0	0	0	0	10	0	0	0	0	0	0	0	0	0	0	0	0	0	0
52	1	19510905	4	64	154	96.5	92	0.12	1.6		0	-1.5	96	1.75	-5.75	82	31	2	0	0	0	0	0	0	0	0	0	0	0	0	0	37	2	2	0	0	0	0	0	0	0	0	0	0	0	0
53	2	19501215	6	67.5	165.5	102	102	0	0		0.5	-1	94	0.25	-1	80	20	2	0	0	0	0	0	0	0	0	0	0	0	0	0	31	2	0	0	0	0	0	0	0	0	0	0	0	0	0
54	2	19361111	5	70	147.5	116.5	105	0.14	0.14		-0.25	-1.5	92	0	0.5	1	10	0	0	0	0	0	0	0	0	0	0	0	0	0	0	10	0	0	0	0	0	0	0	0	0	0	0	0	0	0
55	1	19470306	20	68	164.6	105.5	99	0.08	0.12		0.75	-1	94	0	-0.5	32	47	4	2	2	0	0	2	0	0	0	0	0	0	0	0	47	4	2	2	4	0	0	0	0	0	0	0	0	0	0
56	1	19340723	7	70	170	102	100	1.1	0.34		-3.25	-2	86	-1.5	-2	92	10	0	0	0	0	0	0	0	0	0	0	0	0	0	0	10	0	0	0	0	0	0	0	0	0	0	0	0	0	0
57	1	19540306	10	70	171	100	95	-0.04	-0.02		0.25	-1.75	89	0.25	-1	82	10	0	0	0	0	0	0	0	0	0	0	0	0	0	0	10	0	0	0	0	0	0	0	0	0	0	0	0	0	0
58	2	19461022	4	85.1	158.5	113	114.5	0.02	0		0	0.5	121	0.25	-1	94	47	5	2	2	0	0	0	0	0	0	0	1	0	0	0	43	4	2	2	0	0	0	0	0	0	0	0	0	0	0
59	2	19471105	20	72	159.5	103.5	103	-0.08	0		0.25	1	151	0.75	-1.25	103	15	2	1	0	0	0	0	0	0	0	0	0	0	0	0	15	2	0	0	0	0	0	0	0	0	0	0	0	0	0
60	2	19341024	4	62	145	108.5	102	0.46	0.44		-5	-2.25	57	-9.75	-2.25	70	31	2	0	0	0	0	0	0	0	0	0	0	0	0	0	15	2	0	0	0	0	0	0	0	0	0	0	0	0	0
61	2	19500708	17	72.5	154.5	110.5	108	0.32	0.22		1	0.75	157	0.5	-0.75	89	37	2	2	0	0	0	0	0	0	0	0	0	0	0	0	47	5	2	2	0	0	0	0	0	0	0	0	0	0	0
62	2	19431004	3	63.5	148.5	99.5	101	1.7	0.34		1.5	-2	90	1	-1.25	98	88	8	8	8	8	8	8	8	8	8	8	8	8	8	8	10	0	0	0	0	0	0	0	0	0	0	0	0	0	0
63	1	19460518	12	56	158	92.5	92	-0.04	0		1	-1.5	86	0.75	-1.5	101	15	2	0	0	0	0	0	0	0	0	0	0	0	0	0	31	2	0	0	0	0	0	0	0	0	0	0	0	0	0
64	2	19350624	15	65	156	103.5	99.4	0.32	0.34		-1.25	-2.25	164	-2	-1.25	95	88	8	8	8	8	8	8	8	8	8	8	8	8	8	8	15	2	0	0	0	0	0	0	0	0	0	0	0	0	0
65	2	19430719	6	67.5	158.5	99.5	98.5	1.56	0.48		0.5	0.75	142	1.25	0.25	152	10	0	0	0	0	0	0	0	0	0	0	0	0	0	0	10	0	0	0	0	0	0	0	0	0	0	0	0	0	0
66	2	19481023	8	64	155.5	98.5	97	0.38	0.34		2	0.75	166	1.75	0.75	47	10	0	0	0	0	0	0	0	0	0	0	0	0	0	0	10	0	0	0	0	0	0	0	0	0	0	0	0	0	0
67	1	19380930	3	62.5	161	95.5	93	0.7	0.44		-3.25	-0.75	56	-4.25	-1.5	72	10	0	0	0	0	0	0	0	0	0	0	0	0	0	0	88	8	8	8	8	8	8	8	8	8	8	8	8	8	8
68	2	19430412	18	59.5	146	99	92	0.08	0.06		0	1.75	172	0	2	5	37	2	2	0	0	0	0	0	0	0	0	0	0	0	0	37	2	2	0	0	0	0	0	0	0	0	0	0	0	0
69	2	19480105	5	66.5	155.6	103.5	94.5	0.12	0.04		0	0.5	136	0.25	-0.75	54	10	0	0	0	0	0	0	0	0	0	0	0	0	0	0	37	2	0	2	0	0	0	0	0	0	0	0	0	0	0
70	2	19600229	6	67	155	99	99.7	0.12	0.06		-0.25	-2.25	54	0.75	0.25	10	47	3	2	0	0	0	2	0	0	0	0	0	0	0	0	37	2	2	0	0	0	0	0	0	0	0	0	0	0	0
71	2	19410417	1	43	143.5	86.5	81	0.3	0.1		0.5	1	154	0.5	0.5	28	10	0	0	0	0	0	0	0	0	0	0	7	0	7	0	10	0	0	0	0	0	0	0	0	0	0	7	0	7	0
72	2	19461022	3	56.5	146	98.5	92.3	0.22	0.34		2	-2.75	75	0	2.25	2	37	2	2	0	0	0	0	0	0	0	0	0	0	0	0	53	6	0	2	0	0	0	0	0	0	0	0	0	0	0
73	2	19600809	1	62.5	160	100	86.4	-0.04	-0.06		-0.25	-0.75	112	-0.25	-0.75	91	15	2	0	0	0	0	0	0	0	0	0	0	0	0	0	10	0	0	0	0	0	0	0	0	0	0	0	0	0	0
74	1	19501128	8	58	160	95	89	-0.16	-0.08		0.5	-0.75	77	0.75	-1	100	20	2	0	0	0	0	0	0	0	0	0	0	0	0	0	20	2	0	0	0	0	0	0	0	0	0	0	0	0	0
75	2	19380911	10	50	149.5	90.5	89	1.7	1.1	PDR				-1	-5	94	64	5	2	0	0	0	0	0	1	0	0	3	7	3	0	64	6	2	0	1	0	0	0	0	0	0	3	7	2	0
76	2	19331109	9	49	143.8	91.5	91.5	0.62	0.62	myopic	2.75	2	16	3.5	1.25	173	15	2	0	0	0	0	0	0	0	0	0	0	0	0	0	15	2	0	0	0	0	0	0	0	0	0	0	0	0	0
77	2	19430106	13	67	150.5	107	98	0.34	0.62		2.5	1.5	170	2.75	1.25	14	43	4	0	0	0	0	0	0	0	0	0	0	0	0	0	31	2	0	0	1	0	0	0	0	0	0	0	0	0	0
78	1	19501206	8	78	166.2	103	100	-0.06	-0.04		0.5	-0.75	82	0.75	-1	87	20	2	0	0	0	0	0	0	0	0	0	0	0	0	0	20	2	0	0	0	0	0	0	0	0	0	0	0	0	0
79	2	19411011	10	59	154.3	99	95	0.68	0.28		-4	0	0	-2.25	-1.25	50	88	8	8	8	8	8	8	8	8	8	8	8	8	8	8	10	0	0	0	0	0	0	0	0	0	0	0	0	0	0
80	2	19381023	3	62.5	157.8	101	100	1.7	0.1		-1	-2.25	73	-0.5	-0.5	104	88	8	8	8	8	8	8	8	8	8	8	8	8	8	8	88	8	8	8	8	8	8	8	8	8	8	8	8	8	8
81	1	19620512	10	80	164.5	105.5	96.5	0.1	0.3		-1.75	-0.75	65	-1.25	-0.5	70	31	2	0	0	0	0	0	0	0	0	0	0	0	0	0	31	2	0	0	0	0	0	0	0	0	0	3	0	2	0
82	2	19600412	7	85	164.5	112.5	113.5	0.08	0		-0.75	-0.5	151	-0.5	-0.5	74	20	2	0	0	0	0	0	0	0	0	0	0	0	0	0	20	2	0	0	0	0	0	0	0	0	0	0	0	0	0
83	2	19490121	7	74	156.5	109	105	0.4	0.36		2	-6.25	40	0.75	-6.5	147	15	2	0	0	0	0	0	0	0	0	0	0	0	0	0	15	2	0	0	0	0	0	0	0	0	0	0	0	0	0
84	2	19530922	13	60.5	154.2	96	89	0.02	0.02		0	-0.75	88	0	-0.75	84	37	2	2	1	0	0	0	0	0	0	0	0	0	0	0	37	2	2	2	0	0	0	0	0	0	0	0	0	0	0
85	2	19490417	2	54	151.5	94	91	0.1	0.06		0	0.5	36	0.25	0.75	177	31	2	0	0	0	0	0	0	0	0	0	0	0	0	0	15	2	0	0	0	0	0	0	0	0	0	0	0	0	0
86	2	19381118	2	56.5	162.5	95.5	95	0.4	0.3		1.5	0.75	155	1.25	0.75	14	31	2	0	0	0	0	0	0	0	0	0	0	0	0	0	15	2	0	0	0	0	0	0	0	0	0	0	0	0	0
87	2	19500329	4	61	160	97	90.8	0.52	0.54	myopic	-2.75	-0.5	4	-2.75	-0.25	117	53	2	0	0	4	0	0	0	0	0	0	0	0	0	0	20	2	0	0	0	0	0	0	0	0	0	0	0	0	0
88	2	19421107	9	53	147	90	85.5	0.42	0.64		2.25	1	5	2.5	0.75	176	31	2	0	0	0	0	0	0	0	0	0	0	0	0	0	88	8	8	8	8	8	8	8	8	8	8	8	8	8	8
89	1	19400502	4	64	165.5	98	96	0.3	0.3		-1.25	-0.75	63	-1.5	-1.25	93	37	2	0	2	0	0	0	0	0	0	0	0	0	0	0	31	2	0	0	0	0	0	0	0	0	0	0	0	0	0
90	2	19580216	22	55	152.5	93	90	0.22	1.42		-0.75	-0.5	140	-0.75	-1.25	73	64	3	2	2	0	0	0	0	0	0	0	3	7	2	3	63	2	2	0	0	0	0	0	0	0	0	3	3	2	3
91	2	19520727	1	57	154.5	91	87	0.76	0.7	myopic	-3.25	-1.75	23	-3	-1.75	139	13	1	0	0	0	0	0	0	0	0	0	0	0	0	0	20	2	0	0	0	0	0	0	0	0	0	0	0	0	0
92	2	19341227	3	52.5	154.5	94.5	89	0.4	0.44		0	1.5	165	1.25	2	170	10	0	0	0	0	0	0	0	0	0	0	0	0	0	0	14	0	2	0	0	0	0	0	0	0	0	0	0	0	0
93	2	19531122	0	58	164	91	89	0.7	0.62	myopic	-2.75	-0.5	71	-3.25	-0.5	96	10	0	0	0	0	0	0	0	0	0	0	0	0	0	0	20	2	0	0	0	0	0	0	0	0	0	0	0	0	0
94	2	19530531	10	57	147.3	96	102.5	0.2	0.32		0.5	1	1	0.5	1	17	13	1	0	0	0	0	0	0	0	0	0	0	0	0	0	10	0	0	0	0	0	0	0	0	0	0	0	0	0	0
95	2	19490701	13	46	147.5	86.5	82	0.1	0.1		0.25	-0.5	135	1	-1.75	94	31	2	0	0	0	0	0	0	0	0	0	0	0	0	0	31	2	0	0	0	0	0	0	0	0	0	0	0	0	0
96	1	19560727	3	52	163.3	90	81.3	0.36	0.2		-1.75	-3	106	1	-2.75	79	10	0	0	0	0	0	0	0	0	0	0	0	0	0	0	37	2	0	2	0	0	0	0	0	0	0	0	0	0	0
97	2	19560610	6	59	149.5	97	96	0.4	0.28		-2	-0.75	66	-1.5	-1.25	89	37	2	1	2	0	0	0	0	0	0	0	1	0	0	0	47	5	1	2	0	0	0	0	0	0	0	0	0	0	0
98	2	19360523	20	61	153	98.5	96.3	0.36	0.16		0.75	1.25	154	-0.75	-1	80	31	2	0	0	0	0	0	0	0	0	0	0	0	0	0	53	6	0	2	0	0	1	0	0	0	0	0	0	0	0
99	1	19331126	2	85	165	111	115	0.54	0.64	myopic	-2	-1.5	71	-2.5	-1	82	10	0	0	0	0	0	0	0	0	0	0	0	0	0	0	10	0	0	0	0	0	0	0	0	0	0	0	0	0	0
100	2	19420806	1	65	156.5	102	91	-0.04	-0.08		0.75	-1.75	83	0.25	-0.75	101	10	0	0	0	0	0	0	0	0	0	0	0	0	0	0	10	0	0	0	0	0	0	0	0	0	0	0	0	0	0
101	2	19421001	5	81	158.5	110.5	114.5	0.3	0.66		0.75	1	152	0.75	-1.75	91	15	2	0	0	0	0	0	0	0	0	0	0	0	0	0	10	0	0	0	0	0	0	0	0	0	0	0	0	0	0
102	1	19390917	3	61.5	170	94.5	87	0.12	0.12		1	-2.25	89	0	-2	95	10	0	0	0	0	0	0	0	0	0	0	0	0	0	0	10	0	0	0	0	0	0	0	0	0	0	0	0	0	0
103	1	19410629	6	68	174	95	97	0.14	0.42		2	-5.5	79	-1.75	-3.25	93	10	0	0	0	0	0	0	0	0	0	0	0	0	0	0	10	0	0	0	0	0	0	0	0	0	0	0	0	0	0
104	2	19460330	8	65	155	101	98	0.1	-0.1		-0.25	-0.5	35	0	-0.5	78	10	0	0	0	0	0	0	0	0	0	0	0	0	0	0	15	2	0	0	0	0	0	0	0	0	0	0	0	0	0
105	1	19370714	2	70	170	98.5	94	0.3	1.1		2	2	10	3	1.75	178	10	0	0	0	0	0	0	0	0	0	0	0	0	0	0	31	2	0	0	0	0	0	0	0	0	0	0	0	0	0
106	2	19420115	20	55	153.2	97	94	0.48	1.7								37	2	2	0	0	0	0	0	0	0	0	0	0	0	0	88	8	8	8	8	8	8	8	8	8	8	8	8	8	8
107	2	19420801	20	63	155.5	96	95.3	0.32	1.7		-15.5	-2	12	-15	-0.25	128	10	0	0	0	0	0	0	0	0	0	0	0	0	0	0	88	8	8	8	8	8	8	8	8	8	8	8	8	8	8
108	2	19490404	15	49	148.5	89	85	0.22	0.44		2	-2.75	83	0	4.5	158	37	2	0	2	0	0	0	0	0	0	0	0	0	0	0	47	4	0	2	0	0	0	0	0	0	0	0	0	0	0
109	2	19470305	1	64	154	102	104	0	0.14		0.5	-1.25	93	1	-2.25	74	10	0	0	0	0	0	0	0	0	0	0	0	0	0	0	10	0	0	0	0	0	0	0	0	0	0	0	0	0	0
110	1	19470105	3	77.5	161.5	102.5	112	0.62	0.48		-3.25	-0.75	45	-2.25	-1	166	10	0	0	0	0	0	0	0	0	0	0	0	0	0	0	10	0	0	0	0	0	0	0	0	0	0	0	0	0	0
111	1	19340115	3	69	158.5	104	97.5	0.62	0.48		4.25	0.25	40	3.5	0.75	10	31	2	0	0	0	0	0	0	0	0	0	0	0	0	0	15	2	0	0	0	0	0	0	0	0	0	0	0	0	0
112	2	19390104	15	68	149.5	112.5	100	1.46	0.6	cataract	0	-1	47	0.5	3.75	178	88	8	8	8	8	8	8	8	8	8	8	8	8	8	8	43	4	2	0	0	0	0	0	0	0	0	0	0	0	0
113	1	19320206	1	58	166.5	94	87	1.7	0.4					2.25	-2.75	121	88	8	8	8	8	8	8	8	8	8	8	8	8	8	8	10	0	0	0	0	0	0	0	0	0	0	0	0	0	0
114	1	19400915	17	76	159	105.5	99.5	0.04	0.54		-0.75	-1	105	-3.75	-1	83	31	2	0	0	0	0	0	0	0	0	0	0	0	0	0	88	8	8	8	8	8	8	8	8	8	8	8	8	8	8
115	2	19360922	3	56	151.5	93	96	0.26	0.06		0.25	-1.5	86	0.25	-0.75	121	15	2	0	0	0	0	0	0	0	0	0	0	0	0	0	15	2	0	0	0	0	0	0	0	0	0	0	0	0	0
116	2	19391017	3	70	157.5	104.5	102	0.52	0.32		1.75	1.25	4	1	1.5	176	10	0	0	0	0	0	0	0	0	0	0	0	0	0	0	10	0	0	0	0	0	0	0	0	0	0	0	0	0	0
117	1	19360325	9	66	168	99	96	0.42	0.36		0.25	2.5	170	1.75	-2.25	84	37	2	2	0	0	0	0	0	0	0	0	0	0	0	0	37	2	2	0	0	0	0	0	0	0	0	0	0	0	0
118	2	19510430	17	65	153.5	102.5	99.5	0.52	0.16		0.25	-1	94	0.5	-1.25	94	37	2	2	0	0	0	0	0	0	0	0	1	0	0	0	37	2	2	0	0	0	0	0	0	0	0	0	0	0	0
119	1	19491031	11	75	172.5	105	98	-0.1	-0.1		0.25	-0.75	93	0	-0.25	94	53	6	2	2	0	0	0	0	0	0	0	0	0	0	0	53	6	0	2	0	0	0	0	0	0	0	0	0	0	0
120	1	19570704	3	65	174.2	96.3	89	0.1	0.1		-0.5	-0.75	20	-0.75	-1.25	174	20	2	0	0	0	0	0	0	0	0	0	0	0	0	0	31	2	0	0	0	0	0	0	0	0	0	0	0	0	0
121	2	19390807	7	60	140	103.5	110.5	0.6	0.6	myopic	1.75	0.75	102	1.5	0.25	31	15	2	0	0	0	0	0	0	0	0	0	0	0	0	0	31	2	0	0	0	0	0	0	0	0	0	0	0	0	0
122	2	19340923	7	48	153.5	92	85	0.62	0.48		1	1.5	175	0	2	23	10	0	0	0	0	0	0	0	0	0	0	0	0	0	0	10	0	0	0	0	0	0	0	0	0	0	0	0	0	0
123	2	19520711	12	56	151.5	94	93	0.12	0.12		-0.25	-1.75	86	-0.5	-1	88	20	2	0	0	0	0	0	0	0	0	0	0	0	0	0	13	1	0	0	0	0	0	0	0	0	0	0	0	0	0
124	2	19640918	7	67.5	155	100	96	-0.04	-0.04		-0.25	-1	97	-0.5	-0.5	95	88	8	8	8	8	8	8	8	8	8	8	8	8	8	8	88	8	8	8	8	8	8	8	8	8	8	8	8	8	8
125	1	19500709	20	72	167	100	97	0	0		1	-1.5	86	1.25	-1.75	87	37	2	0	2	0	0	0	0	0	0	0	0	0	0	0	31	2	0	0	0	0	0	0	0	0	0	0	0	0	0
126	1	19650813	4	68	160.5	97	92	0	-0.02		-1.75	-2	159	-1.5	-0.5	9	10	0	0	0	0	0	0	0	0	0	0	0	0	0	0	20	2	0	0	0	0	0	0	0	0	0	0	0	0	0
128	2	19500619	18	61.5	156	96	85	0.22	0.2		0	0.75	178	0.5	-1.25	87	15	2	0	0	0	0	0	0	0	0	0	0	0	0	0	10	0	0	0	0	0	0	0	0	0	0	0	0	0	0
129	1	19530118	4	59.5	158	89	79	-0.02	0.4		0	-0.5	128	-1.25	-0.5	21	37	2	2	2	0	0	1	0	0	0	0	0	0	0	0	37	2	2	0	0	0	0	0	0	0	0	3	0	2	0
130	2	19470317	2	42	148	87.5	85	0.42	0.46		-1.75	-0.25	100	-1.5	-1.25	98	10	0	0	0	0	0	0	0	0	0	0	0	0	0	0	10	0	0	0	0	0	0	0	0	0	0	0	0	0	0
131	2	19400616	20	58.5	147	97	91	0.2	0.58		0	-1	69	-2	-1	97	10	0	0	0	0	0	0	0	0	0	0	0	0	0	0	10	0	0	0	0	0	0	0	0	0	0	0	0	0	0
132	2	19420907	14	51	150	94	80	0.16	0.7		1	1.25	129	-2	-3.75	148	31	2	0	0	0	0	0	0	0	0	0	0	0	0	0	10	0	0	0	0	0	0	0	0	0	0	0	0	0	0
133	1	19440725	18	72	165	100	101.5	0.2	0.16		1.25	-2	78	1.5	-2.25	89	43	2	2	2	2	0	0	0	0	0	0	0	0	0	0	47	5	2	2	0	0	0	0	0	0	0	3	0	2	0
134	2	19541114	12	62	155	98	96	1.1	1.1	myopic	-3	-4.5	104	-4.5	-3.75	82	20	2	0	0	0	0	0	0	0	0	0	0	0	0	0	37	2	0	2	0	0	0	0	0	0	0	0	0	0	0
135	1	19561013	12	81.5	172	105.5	106	0.46	1.7		0	0.25	8	9.5	1.25	88	71	2	0	0	0	0	0	0	0	0	3	1	3	0	0	85	8	8	8	8	8	8	8	8	4	8	8	8	8	8
136	2	19380102	5	60	151.5	104	101	0.3	0.22		1.25	-4	5	1	-3	6	20	2	0	0	0	0	0	0	0	0	0	0	0	0	0	15	2	0	0	0	0	0	0	0	0	0	0	0	0	0
137	2	19561026	7	57	148.5	91	91	0.1	0.16		1.25	-1.5	92	0	1.25	10	31	2	0	0	0	0	0	0	0	0	0	0	0	0	0	31	2	0	0	0	0	0	0	0	0	0	0	0	0	0
138	2	19420702	4	55	158	95	93	0.04	0		0	0.75	4	0.75	-1.25	87	31	2	0	0	0	0	0	0	0	0	0	0	0	0	0	10	0	0	0	0	0	0	0	0	0	0	0	0	0	0
139	1	19371224	4	60	158	102	97	0.12	0.16		0.25	1	153	0	1.75	17	10	0	0	0	0	0	0	0	0	0	0	0	0	0	0	10	0	0	0	0	0	0	0	0	0	0	0	0	0	0
140	1	19691020	5	91	167	111	103	-0.1	-0.04		0.5	-0.75	93	0	0.25	77	43	3	2	2	0	0	0	0	0	0	0	1	0	0	0	43	2	2	2	2	0	0	0	0	0	0	2	0	0	0
141	2	19470614	10	62	156.5	96	88.5	0.2	0.3		0.25	0.75	168	0.25	0.5	24	47	5	0	2	0	0	0	0	0	0	0	0	0	0	0	47	5	0	2	0	0	0	0	0	0	0	0	0	0	0
142	1	19400819	13	78.5	175.5	102	100.5	0	0		0	-1	83	0	-1	85	31	2	0	0	0	0	0	0	0	0	0	0	0	0	0	31	2	0	0	0	0	0	0	0	0	0	0	0	0	0
143	2	19510708	4	80	155	108	112	0.16	0.36		0.5	-0.75	89	0	0.25	13	10	0	0	0	0	0	0	0	0	0	0	0	0	0	0	15	2	0	0	0	0	0	0	0	0	0	0	0	0	0
144	1	19420802	20	61	159.5	94	87.5	0.1	0.22		1	0.5	156	0.75	0.75	95	15	2	0	0	0	0	0	0	0	0	0	0	0	0	0	31	2	0	0	0	0	0	0	0	0	0	0	0	0	0
145	2	19360225	10	46.5	145	92	93	1.1	0.64	myopic	2.25	1	143	1.75	1.25	4	10	0	0	0	0	0	0	0	0	0	0	0	0	0	0	31	2	0	0	0	0	1	0	0	0	0	0	0	0	0
146	1	19420128	1	74.5	164.5	102	96	0.12	-0.1		1	-1.75	75	-1	-0.25	76	31	2	0	0	0	0	0	0	0	0	0	0	0	0	0	10	0	0	0	0	0	0	0	0	0	0	0	0	0	0
147	1	19430724	13	69	159	102.5	98	0.7	0.3		-3.75	-2.25	31	0	-3	151	53	4	2	0	0	0	3	0	0	0	0	0	0	0	0	53	3	2	2	2	0	3	0	0	0	0	2	0	0	0
148	2	19700224	10	61	150	95	87	0.7	1.1	myopic	-5.25	-0.75	84	-5.5	-0.75	83	20	2	0	0	0	0	0	0	0	0	0	0	0	0	0	10	0	0	0	0	0	0	0	0	0	0	0	0	0	0
149	2	19500404	5	70	157.5	99	102	1.36	1.3	myopic	-4.75	-3	76	-6.25	-1.25	86	12	2	2	0	0	0	0	0	0	0	0	7	0	0	0	10	0	0	0	0	0	0	0	0	0	0	0	0	0	0
150	1	19520910	4	69	168.5	98.5	98	0.62	1.22	myopic	-3.5	-0.5	60	-4	-0.5	111	10	0	0	0	0	0	0	0	0	0	0	0	0	0	0	10	0	0	0	0	0	0	0	0	0	0	0	0	0	0
151	2	19580323	8	68	159	101.5	100	0	0		0	0.25	145	0.5	0.25	59	37	2	2	0	0	0	0	0	0	0	0	0	0	0	0	31	2	0	0	0	0	0	0	0	0	0	0	0	0	0
152	2	19610524	12	48.5	151.5	85	79	0.04	0.2		0	0.25	150	0.25	0.5	170	43	3	2	2	0	0	0	0	0	0	0	1	0	0	0	53	5	2	2	2	0	2	0	0	0	0	3	0	2	0
153	2	19481122	7	77.5	152.5	115	104	0.22	0.2		0.5	-2.25	86	0.75	-1.75	97	15	2	0	0	0	0	0	0	0	0	0	0	0	0	0	88	8	8	8	8	8	8	8	8	8	8	8	8	8	8
154	2	19471123	3	70	151	113	112	0.34	0.24		0.5	-1	102	0.5	2	170	10	0	0	0	0	0	0	0	0	0	0	0	0	0	0	14	0	0	2	0	0	0	0	0	0	0	0	0	0	0
155	2	19461006	1	61	154	95	93	0.02	0.1		1.25	-1.5	83	1.5	-2	91	20	2	0	0	0	0	0	0	0	0	0	0	0	0	0	20	2	0	0	0	0	0	0	0	0	0	0	0	0	0
156	1	19530901	10	71	162	100	99	0.22	0.2		0.75	1	166	1.25	0.25	31	20	2	0	0	0	0	0	0	0	0	0	0	0	0	0	20	2	0	0	0	0	0	0	0	0	0	0	0	0	0
157	2	19460120	5	67	150	104	107	0.12	0.28		1	1	178	0.5	0.75	27	10	0	0	0	0	0	0	0	0	0	0	0	0	0	0	10	0	0	0	0	0	0	0	0	0	0	0	0	0	0
158	2	19320302	10	66	146	97	96	0.12	0.4		0.25	1.25	169	0.75	1.25	180	37	2	2	0	0	0	0	0	0	0	0	0	0	0	0	31	2	0	0	0	0	0	0	0	0	0	8	0	8	0
159	1	19540107	10	85	167.5	104	105	0.22	0		-0.25	-1.25	66	-0.25	-0.5	40	53	6	2	2	2	0	0	0	0	0	0	3	0	2	0	53	6	2	2	2	0	0	0	0	0	0	3	0	2	0
160	2	19540808	8	85	153.5	114	119.5	0.1	0.1		0.5	-1	82	0	-1	117	31	2	0	0	0	0	0	0	0	0	0	0	0	0	0	37	2	2	0	0	0	0	0	0	0	0	0	0	0	0
161	2	19471201	8	67	160	101	101.5	0.58	0.2		2.25	1	1	1.25	1	161	10	0	0	0	0	0	0	0	0	0	0	0	0	0	0	10	0	0	0	0	0	0	0	0	0	0	0	0	0	0
162	2	19450610	5	52	154.5	91	91.5	0.1	0.7		1	-1.25	61	-4	-3.25	79	10	0	0	0	0	0	0	0	0	0	0	0	0	0	0	10	0	0	0	0	0	0	0	0	0	0	0	0	0	0
163	2	19510108	17	66.5	150	102.5	98	0.52	0.2		-1	-1.5	99	-0.5	-2.25	82	37	2	2	2	0	0	0	0	0	0	0	0	0	0	0	53	2	2	2	4	0	0	0	0	0	0	0	0	0	0
164	2	19440330	3	62	155.5	101	98	1.44	0.58	myopic	-4.25	-1	46	0	-0.75	26	88	8	8	8	8	8	8	8	8	8	8	8	8	8	8	10	0	0	0	0	0	0	0	0	0	0	0	0	0	0
165	1	19490220	2	66	152.5	95	91	0.16	0.02		0.75	1	67	0.75	1	88	10	0	0	0	0	0	0	0	0	0	0	0	0	0	0	15	2	0	0	0	0	0	0	0	0	0	0	0	0	0
166	2	19491129	4	73	154.5	113.5	108	0	-0.1		1	0.75	25	0.5	0.75	168	10	0	0	0	0	0	0	0	0	0	0	0	0	0	0	31	2	0	0	0	0	0	0	0	0	0	0	0	0	0
167	1	19561221	3	89	181	109	106	-0.12	-0.1		-0.25	-0.75	61	0	-1	105	10	0	0	0	0	0	0	0	0	0	0	0	0	0	0	20	2	0	0	0	0	0	0	0	0	0	0	0	0	0
168	2	19500716	1	68	150	106	105	0.06	0.02		1	-1.25	95	0	1	179	20	2	0	0	0	0	0	0	0	0	0	0	0	0	0	20	2	0	0	0	0	0	0	0	0	0	0	0	0	0
169	2	19560601	6	74	159.5	102	106.5	0.4	0.32		0	-1	107	0.25	-1.25	83	20	2	0	0	0	0	0	0	0	0	0	0	0	0	0	31	2	0	0	0	0	0	0	0	0	0	0	0	0	0
170	2	19501126	4	60	153	95	100	0.26	0.12		1.75	0.25	135	0	0.75	114	37	2	2	2	0	0	0	0	0	0	0	0	0	0	0	31	2	0	0	0	0	0	0	0	0	0	0	0	0	0
171	2	19440226	14	88.5	157	115.5	117	-0.08	0.08		0.5	-0.75	32	0.5	0.75	34	20	2	0	0	0	0	0	0	0	0	0	0	0	0	0	37	2	2	0	0	0	0	0	0	0	0	0	0	0	0
172	2	19450108	4	69	154	103	105	0.14	0.12		1.5	0.75	8	1.5	0.75	3	20	2	0	0	0	0	0	0	0	0	0	0	0	0	0	10	0	0	0	0	0	0	0	0	0	0	0	0	0	0
174	1	19640209	16	56	167.5	89	86	0.74	1.22	PDR	-3.25	-1.25	60	-3.25	-2.5	39	85	8	8	8	8	8	8	3	8	8	3	8	8	8	8	85	2	0	0	0	0	3	3	3	4	3	8	0	8	0
175	2	19511215	20	48	156	92	87.5	1.38	0.56	myopic	1.75	-3	89	1.75	-2.25	88	71	2	0	1	0	0	0	0	3	2	3	0	0	0	0	71	2	0	0	0	0	0	0	3	2	3	0	0	0	0
176	1	19580331	5	72	158	97	97	-0.06	-0.06		0	-1	109	0.25	-1.25	77	20	2	0	0	0	0	0	0	0	0	0	0	0	0	0	31	2	0	0	0	0	0	0	0	0	0	0	0	0	0
177	1	19510423	6	69	164	95	94.5	0.02	0.14		1	-1.5	68	0.25	-1.5	50	10	0	0	0	0	0	0	0	0	0	0	0	0	0	0	10	0	0	0	0	0	0	0	0	0	0	0	0	0	0
178	2	19501029	8	48	154	87	86.5	-0.06	-0.1		0	0.5	132	0.25	-0.75	113	13	1	0	0	0	0	0	0	0	0	0	0	0	0	0	10	0	0	0	0	0	0	0	0	0	0	0	0	0	0
179	2	19390909	4	58	150	98	99	1.3	1.3	myopic	-8.75	-5.25	104	-6.5	-2.5	81	10	0	0	0	0	0	0	0	0	0	0	0	0	0	0	10	0	0	0	0	0	0	0	0	0	0	0	0	0	0
180	2	19530225	10	54.5	154.5	94	91	0.1	1.7		0.5	-1.75	68	0.25	-2	81	10	0	0	0	0	0	0	0	0	0	0	0	0	0	0	31	2	0	1	0	0	0	0	0	0	0	0	0	0	0
181	1	19490925	18	72	171	96	93	0.6	0.62	myopic	2.25	0.75	155	2.75	0.5	18	31	2	0	0	0	0	0	0	0	0	0	0	0	0	0	31	2	0	0	0	0	0	0	0	0	0	0	0	0	0
182	1	19440914	4	66.5	163	93	94	0.2	0		-3.5	-0.75	30	-2	-2.75	53	20	2	0	0	0	0	0	0	0	0	0	0	0	0	0	10	0	0	0	0	0	0	0	0	0	0	0	0	0	0
183	1	19500815	5	67.5	170	100	99	0	-0.06		1	-1.25	82	0.75	-1	87	31	2	0	0	0	0	0	0	0	0	0	0	0	0	0	20	2	0	0	0	0	0	0	0	0	0	0	0	0	0
184	1	19640110	2	59.5	168.5	93.5	92	-0.1	-0.1		0.25	-0.75	97	0.25	-0.75	100	10	0	0	0	0	0	0	0	0	0	0	0	0	0	0	10	0	0	0	0	0	0	0	0	0	0	0	0	0	0
185	1	19481128	15	65	164.5	99	100	0.24	1.7		-0.5	-1.25	43	-4.75	-3.75	82	37	2	2	0	0	0	0	0	0	0	0	0	0	0	0	37	2	2	0	0	0	0	0	0	0	0	0	0	0	0
186	1	19680625	2	71	166.5	97.5	96	-0.1	-0.02		-0.25	-0.25	111	0.25	-0.75	86	10	0	0	0	0	0	0	0	0	0	0	0	0	0	0	10	0	0	0	0	0	0	0	0	0	0	0	0	0	0
187	2	19581020	1	93	153.5	130	125	0.02	0		0	0.75	175	0.25	0.75	11	14	1	2	0	0	0	0	0	0	0	0	0	0	0	0	20	2	0	0	0	0	0	0	0	0	0	0	0	0	0
188	2	19480415	6	66.5	151	101	104.5	0.1	0.1		0	1.25	167	0	0.5	177	31	2	0	1	0	0	0	0	0	0	0	0	0	0	0	12	2	0	0	0	0	0	0	0	0	0	0	0	0	0
189	1	19291130	1	102	183.5	114	122	0.32	0.3		-5	-0.25	37	-3	-1.25	79	10	0	0	0	0	0	0	0	0	0	0	0	0	0	0	10	0	0	0	0	0	0	0	0	0	0	0	0	0	0
190	2	19560211	12	65	160	93.5	91.5	0.68	0.4		-1.25	-2	93	-1	-1	89	53	6	2	2	3	0	0	0	0	0	0	2	0	0	0	53	5	2	2	2	0	0	0	0	0	0	2	0	0	0
191	1	19600503	5	84	165.5	111	107	0.88	1	myopic	-3	-1	80	-3.25	-1.75	95	31	2	0	0	0	0	0	0	0	0	0	0	0	0	0	31	2	0	0	0	0	0	0	0	0	0	0	0	0	0
192	1	19620523	10	61	153.5	93.5	90	1.7	0.9	myopic	-8.25	-1	146	-7.5	-1.25	174	20	2	0	0	0	0	0	0	0	0	0	0	0	0	0	10	0	0	0	0	0	0	0	0	0	0	0	0	0	0
193	1	19401127	6	81	158.5	106	102.5	-0.06	0.04		2.25	-2.5	67	0.25	2	14	88	8	8	8	8	8	8	8	8	8	8	8	8	8	8	10	0	0	0	0	0	0	0	0	0	0	0	0	0	0
194	1	19621119	10	72.5	164	98	93	0.64	-0.1		-2.25	-0.75	63	-0.25	-0.5	41	31	2	0	0	0	0	0	0	0	0	0	0	0	0	0	31	2	0	0	0	0	0	0	0	0	0	0	0	0	0
195	2	19590322	2	60	158	98.5	91	-0.1	0.16		0.25	0.25	161	0.25	-1	80	20	2	0	0	0	0	0	0	0	0	0	0	0	0	0	15	2	0	0	0	0	0	0	0	0	0	0	0	0	0
196	2	19601112	8	74	155	103.5	102	0.32	0		1	-2	14	0	0.5	52	10	0	0	0	0	0	0	0	0	0	0	0	0	0	0	20	2	0	0	0	0	0	0	0	0	0	0	0	0	0
197	2	19510403	2	66	158	100	105	0.32	0.24		1.75	-2.75	93	1.75	-2.5	88	20	2	0	0	0	0	0	0	0	0	0	0	0	0	0	20	2	0	0	0	0	0	0	0	0	0	0	0	0	0
198	2	19371222	28	65	154.2	99.5	91.5	0.58	1.12	myopic	0	2	163	0	2	173	43	3	2	0	0	0	1	0	0	0	0	3	0	2	0	47	2	2	0	0	0	2	0	0	0	0	2	0	0	0
200	1	19581130	0	80	168.5	99.5	99	-0.04	-0.1		0.5	-0.75	92	-0.25	-0.75	75	10	0	0	0	0	0	0	0	0	0	0	0	0	0	0	10	0	0	0	0	0	0	0	0	0	0	0	0	0	0
201	2	19470824	8	52.5	148	94.5	92	0.04	0.06		0.25	-0.5	167	-0.5	-0.5	176	10	0	0	0	0	0	0	0	0	0	0	0	0	0	0	10	0	0	0	0	0	0	0	0	0	0	0	0	0	0
202	2	19520109	7	66.5	153	95.5	95	0.06	0.1		-1	-0.75	44	-1.25	-1.25	103	10	0	0	0	0	0	0	0	0	0	0	0	0	0	0	10	0	0	0	0	0	0	0	0	0	0	0	0	0	0
203	2	19541206	8	74	160	102	106.5	-0.02	0.22		0.75	-1.25	78	-0.25	-1	99	31	2	0	0	0	0	0	0	0	0	0	0	0	0	0	37	2	2	0	0	0	0	0	0	0	0	0	0	0	0
204	2	19401025	1	62	151.5	96	101	0.28	0.62		0.75	-1	110	1.75	-3	76	10	0	0	0	0	0	0	0	0	0	0	0	0	0	0	88	8	8	8	8	8	8	8	8	8	8	8	8	8	8
205	2	19500514	15	59	155.5	98.5	88	0.34	0.4		-4.75	-2.75	90	-4	-2.75	78	10	0	0	0	0	0	0	0	0	0	0	0	0	0	0	15	2	0	0	0	0	0	0	0	0	0	0	0	0	0
206	1	19611228	14	65.5	171.5	93.5	91	0.52	0.6	PDR	-2.75	-2.5	57	-5	-0.75	32	65	5	0	2	4	0	2	2	0	0	0	0	0	0	0	71	5	2	0	2	0	3	3	0	0	0	3	0	2	0
207	2	19540207	7	75	154	102	107.5	0.48	0.6		-0.25	-2.75	86	-0.25	-3	100	31	2	0	0	0	0	0	0	0	0	0	0	0	0	0	10	0	0	0	0	0	0	0	0	0	0	0	0	0	0
208	1	19470605	1	65	166.8	96	94	0.22	0.12		0.25	0.75	163	0.5	-1	171	10	0	0	0	0	0	0	0	0	0	0	0	0	0	0	88	8	8	8	8	8	8	8	8	8	8	8	8	8	8
209	2	19480827	8	61	153	98	104	0.56	0.48		-1.75	-2.75	84	-0.75	-2.25	85	47	5	2	2	0	0	0	0	0	0	0	2	0	0	0	43	4	2	0	0	0	0	0	0	0	0	3	0	2	0
210	1	19450915	8	60	156.5	96	93	0.2	1.14		0.5	1	20	-3.25	-5.5	163	37	2	0	2	0	0	0	0	0	0	0	0	0	0	0	31	2	8	1	8	8	8	8	8	8	8	0	0	0	0
211	1	19420323	10	80	177	105	107	0.24	0.52		0.75	0.25	137	0.5	1	53	37	2	2	0	0	0	0	0	0	0	0	0	0	0	0	15	2	0	0	0	0	0	0	0	0	0	0	0	0	0
212	2	19541204	13	73	158	97	107.5	-0.02	0.4		-0.5	-0.25	65	-1	-1	87	37	2	2	0	0	0	0	0	0	0	0	0	0	0	0	37	2	2	2	0	0	1	0	0	0	0	0	0	0	0
213	1	19380816	13	62	164	92	91	-0.1	-0.08		0	-0.75	71	-0.25	-0.5	59	31	2	0	0	0	0	0	0	0	0	0	0	0	0	0	31	2	0	0	0	0	0	0	0	0	0	0	0	0	0
214	2	19390303	11	69	157	101	99	0.1	0.3		0	-0.5	50	1.25	-2.25	80	10	0	0	0	0	0	0	0	0	0	0	0	0	0	0	15	2	0	0	0	0	0	0	0	0	0	0	0	0	0
215	2	19460607	11	63.5	157	98.5	104	0.5	0.3		2	-3	58	0	3	173	37	2	2	0	0	0	0	0	0	0	0	3	0	3	0	31	2	0	0	0	0	0	0	0	0	0	0	0	0	0
216	2	19471030	9	66	155	96	102	0.2	0.2		1.5	-2.25	93	1.75	-2.5	94	37	2	2	0	0	0	0	0	0	0	0	0	0	0	0	31	2	0	0	0	0	0	0	0	0	0	0	0	0	0
217	2	19481226	13	76	158	106.5	109	0.8	0.92	myopic	-0.75	-3.5	66	-2.5	-1.25	117	31	2	0	0	0	0	0	0	0	0	0	0	0	0	0	37	2	2	0	0	0	0	0	0	0	0	0	0	0	0
218	2	19490323	2	70	146.5	109.5	107	0.18	0.42		0.5	1.5	147	0.75	1.75	25	31	2	0	0	0	0	0	0	0	0	0	0	0	0	0	37	2	2	0	0	0	0	0	0	0	0	0	0	0	0
219	2	19411219	15	77	155	109	105	1.7	0.7	myopic	3.75	-11.25	79	1	2.75	174																88	8	8	8	8	8	8	8	8	8	8	8	8	8	8
220	2	19520428	5	69.5	156	98.5	99	-0.02	-0.02		0.75	-1.5	87	0.5	-1.25	102	10	0	0	0	0	0	0	0	0	0	0	0	0	0	0	10	0	0	0	0	0	0	0	0	0	0	0	0	0	0
221	1	19640109	3	78.5	167	100	98.5	-0.1	0.9		-1	-1	38	-4.25	-0.75	53	20	2	0	0	0	0	0	0	0	0	0	0	0	0	0	10	0	0	0	0	0	0	0	0	0	0	0	0	0	0
222	2	19560810	5	82	161.5	108	112	1.16	0.1		-0.75	-0.75	49	0.25	-1	96	37	2	2	2	0	0	0	0	0	0	0	3	0	2	3	31	2	0	0	0	0	0	0	0	0	0	0	0	0	0
223	1	19600307	6	73	170	99.5	98	-0.1	-0.02		0.25	-0.5	95	0.25	-0.5	124	13	1	0	0	0	0	0	0	0	0	0	0	0	0	0	10	0	0	0	0	0	0	0	0	0	0	0	0	0	0
224	1	19350815	4	80	171.5	105	105	0.4	0.6		3.5	-4.25	69	-1.25	-1.75	90	37	2	2	0	0	0	0	0	0	0	0	0	0	0	0	88	8	8	8	8	8	8	8	8	8	8	8	8	8	8
225	2	19510901	22	65	154.5	92	101	0.1	0.1		0.25	1	169	0.5	0.75	14	43	2	2	0	2	0	0	0	0	0	0	0	0	0	0	37	2	2	0	0	0	0	0	0	0	0	0	0	0	0
226	2	19670822	7	57	158.5	92	90	-0.02	-0.02		0.25	-0.5	11	0	0.5	62	20	2	0	0	0	0	0	0	0	0	0	0	0	0	0	31	2	0	0	0	0	0	0	0	0	0	0	0	0	0
227	2	19480528	3	52.5	154	93	90	0.2	0.2		-1.25	-1	82	-1.5	-1.5	74	10	0	0	0	0	0	0	0	0	0	0	0	0	0	0	10	0	0	0	0	0	0	0	0	0	0	0	0	0	0
228	2	19470317	10	66.5	150	97	98	0.2	0.18		-0.5	-1.25	90	-0.75	-1.5	96	37	2	0	2	0	0	0	0	0	0	0	0	0	0	0	37	2	0	2	0	0	0	0	0	0	0	0	0	0	0
229	1	19440930	15	67	134	98.5	94	-0.04	-0.02		0.25	-0.75	50	0.5	-0.75	84	15	2	0	0	0	0	0	0	0	0	0	0	0	0	0	15	2	0	0	0	0	0	0	0	0	0	0	0	0	0
230	2	19550526	4	71.5	166	100	97	0.1	0.14		-0.5	-0.75	84	-0.5	-1	80	31	2	0	1	1	0	0	0	0	0	0	0	0	0	0	31	2	0	0	0	0	0	0	0	0	0	0	0	0	0
231	2	19520723	10	65	162	101.5	101	0.04	0		0.5	1	173	0.25	1	174	15	2	0	0	0	0	0	0	0	0	0	0	0	0	0	31	2	0	0	0	0	0	0	0	0	0	0	0	0	0
232	2	19590120	10	53	154	91	91	0.68	1.1	diabetic maculopathy	0.75	-1.75	86	0.25	-1.75	92	53	6	2	0	2	0	2	0	0	0	0	3	0	2	0	53	5	2	0	2	0	2	0	0	0	0	3	0	2	0
233	2	19461106	11	65	156	94	99	0.04	1.1		1	-1.75	96	-2.75	-4.25	25	31	2	0	0	0	0	0	0	0	0	0	0	0	0	0	88	8	8	8	8	8	8	8	8	8	8	8	8	8	8
234	2	19371214	13	65	148	103	109	0.58	0.1		-3	-1.75	90	-0.25	-1.25	82	43	4	2	0	0	0	0	0	0	0	0	0	0	0	0	43	3	2	0	0	0	0	0	0	0	0	0	0	0	0
235	2	19490907	13	63	154	95	108	0.1	0.14		0.75	-1	68	0	0.75	37	20	2	0	0	0	0	0	0	0	0	0	0	0	0	0	37	2	2	0	0	0	0	0	0	0	0	0	0	0	0
236	2	19501119	5	55	160	91.5	90.5	0.1	0.2		0	-1	94	-1	-0.25	132	10	0	0	0	0	0	0	0	0	0	0	0	0	0	0	10	0	0	0	0	0	0	0	0	0	0	0	0	0	0
237	2	19581210	10	64.5	154.5	99	102	0.4	0.3		0.25	-2.75	73	-0.25	-1.75	103	10	0	0	0	0	0	0	0	0	0	0	0	0	0	0	10	0	0	0	0	0	0	0	0	0	0	0	0	0	0
238	2	19371221	17	50	160	85	90	0.7	0.48		-3	-1.5	100	1.25	0.75	137	37	2	2	0	0	0	0	0	0	0	0	0	0	0	0	15	2	0	0	0	0	0	0	0	0	0	0	0	0	0
239	2	19471020	13	56.5	153.5	95	88.5	0.16	0.2		-0.25	-1.5	56	-0.5	-1.75	102	31	2	0	0	0	0	0	0	0	0	0	0	0	0	0	31	2	0	0	0	0	0	0	0	0	0	0	0	0	0
240	2	19420407	9	63	157	100	101	0.3	0.38		1	-1.5	92	2.25	-3	100	15	2	0	0	0	0	0	0	0	0	0	0	0	0	0	10	0	0	0	0	0	0	0	0	0	0	0	0	0	0
241	2	19580319	2	65	154.5	103.5	98	0.14	0.34		0.75	1.75	5	2.25	-2.75	67	37	2	0	2	0	0	0	0	0	0	0	0	0	0	0	20	2	0	0	0	0	0	0	0	0	0	0	0	0	0
242	1	19580319	15	66	163.6	96	93	-0.1	0.1		0	-0.5	55	-0.75	-0.25	11	37	2	2	1	0	0	0	0	0	0	0	0	0	0	0	37	2	2	2	0	0	0	0	0	0	0	0	0	0	0
243	2	19390506	8	43	150	98	91	0.64	0.66	myopic	1.5	1	155	1.5	1	33	15	2	0	0	0	0	0	0	0	0	0	0	0	0	0	15	2	0	0	0	0	0	0	0	0	0	0	0	0	0
244	2	19591209	1	55	161	98	85	0	-0.1		0.5	-1	92	0.25	-0.75	100	37	2	0	2	0	0	0	0	0	0	0	0	0	0	0	37	2	0	2	0	0	0	0	0	0	0	0	0	0	0
245	1	19320913	12	83	166.5	109	112	0.64	0.44		-7.25	-0.75	77	-4	-2.5	48	37	2	0	2	0	0	0	0	0	0	0	0	0	0	0	31	2	0	0	0	0	0	0	0	0	0	0	0	0	0
246	2	19560103	7	61.5	161	90	97	0.14	0.22		1.25	1	5	1.25	0.25	152	37	2	2	1	0	0	0	0	0	0	0	0	0	0	0	10	0	0	0	0	0	0	0	0	0	0	0	0	0	0
247	2	19480906	9	69	157.5	106	106.5	0	0.02		-0.25	-0.75	75	0	-1	97	20	2	0	0	0	0	0	0	0	0	0	0	0	0	0	20	2	0	0	0	0	0	0	0	0	0	0	0	0	0
248	1	19430208	8	71.5	165	100	99	-0.08	-0.1		0.75	-1	91	0	0.5	169	15	2	0	0	0	0	0	0	0	0	0	0	0	0	0	15	2	0	0	0	0	0	0	0	0	0	0	0	0	0
249	2	19400407	7	64	156	92	99	0.2	0.76		0.25	-1	76	0.5	-2.75	89	88	8	8	8	8	8	8	8	8	8	8	8	8	8	8	88	8	8	8	8	8	8	8	8	8	8	8	8	8	8
250	1	19400429	3	91	161.5	114	116	0.2	0.12		-0.25	-1	83	0	-1.75	86	20	2	0	0	0	0	0	0	0	0	0	0	0	0	0	15	2	0	0	0	0	0	0	0	0	0	0	0	0	0
251	2	19460330	2	61.5	162.5	99	97	0.06	0.34		1	0	0	0.75	0	0	10	0	0	0	0	0	0	0	0	0	0	0	0	0	0	15	2	0	0	0	0	0	0	0	0	0	0	0	0	0
252	2	19370412	11	63	155	98	101	0.18	0.4		0.75	-1	97	-0.5	-1.5	120	37	2	2	0	0	0	0	0	0	0	0	0	0	0	0	88	8	8	8	8	8	8	8	8	8	8	8	8	8	8
253	2	19411017	8	58	153.5	92	98	0.78	0.16		0.75	2.75	179	0	-0.5	60	10	0	0	0	0	0	0	0	0	0	0	0	0	0	0	10	0	0	0	0	0	0	0	0	0	0	0	0	0	0
254	2	19460313	14	68	153	101	104	0.16	0.1		0	-1.5	110	0.75	-1.25	74	10	0	0	0	0	0	0	0	0	0	0	0	0	0	0	20	2	0	0	0	0	0	0	0	0	0	0	0	0	0
255	2	19550916	10	55	161	81	98	0.04	0.04		0.75	-1	89	0.5	-0.75	111	20	2	0	1	0	0	0	0	0	0	0	0	0	0	0	10	0	0	0	0	0	0	0	0	0	0	0	0	0	0
256	2	19441004	5	65	157.5	99	93	-0.08	0.4		0.75	-1.75	27	-2	-1.25	78	37	2	2	0	0	0	0	0	0	0	0	0	0	0	0	10	0	0	0	0	0	0	0	0	0	0	0	0	0	0
257	1	19301124	5	83	165	114	103	0.4	0.54								88	8	8	8	8	8	8	8	8	8	8	8	8	8	8	88	8	8	8	8	8	8	8	8	8	8	8	8	8	8
258	2	19450323	10	69	149	101	107	0.7	0.52	myopic	1.25	0.5	153	0.5	0.5	175	20	2	0	0	0	0	0	0	0	0	0	0	0	0	0	10	0	0	0	0	0	0	0	0	0	0	0	0	0	0
259	2	19450824	6	67	165	104	84.8	0.14	0.06		0.25	2	178	0.5	1.25	173	20	2	0	0	0	0	0	0	0	0	0	0	0	0	0	10	0	0	0	0	0	0	0	0	0	0	0	0	0	0
260	1	19510605	8	74	163.5	99.5	99	0.04	0.08		0.5	-0.75	55	0	0.5	7	10	0	0	0	0	0	0	0	0	0	0	0	0	0	0	31	2	0	0	0	0	0	0	0	0	0	0	0	0	0
261	2	19550925	6	59.5	150	98.5	94	-0.04	-0.06		0.75	-1.25	90	1	-1.5	79	37	2	2	0	0	0	0	0	0	0	0	0	0	0	0	37	2	2	0	0	0	0	0	0	0	0	0	0	0	0
262	2	19421003	5	58	150	97	97	0.04	0.14		0.75	1.25	157	0.5	1.5	4	10	0	0	0	0	0	0	0	0	0	0	0	0	0	0	10	0	0	0	0	0	0	0	0	0	0	0	0	0	0
263	2	19540917	8	70	153	104	106	0.12	0.04		0.5	0.25	61	0.5	0.75	170	37	2	0	2	0	0	0	0	0	0	0	0	0	0	0	20	2	0	0	0	0	0	0	0	0	0	0	0	0	0
264	1	19450111	20	66	169	96	98	1.4	1.3	myopic	-5	-2.5	80	-3.75	-1	109	31	2	0	0	0	0	0	0	0	0	0	0	0	0	0	31	2	0	0	0	0	0	0	0	0	0	0	0	0	0
265	1	19430131	10	71.5	163.5	100	99	0.08	0.2		1	-1.25	67	1.25	-1.5	98	31	2	0	0	0	0	0	0	0	0	0	0	0	0	0	43	3	2	0	0	0	0	0	0	0	0	0	0	0	0
266	2	19471013	15	73	155	103	106	0.22	0.2		1.5	-3	84	1.5	-2.5	96	10	0	0	0	0	0	0	0	0	0	0	0	0	0	0	15	2	0	0	0	0	0	0	0	0	0	0	0	0	0
267	1	19460728	5	85	166	109	108	0.06	0.1		0	0.25	118	0	0.25	122	10	0	0	0	0	0	0	0	0	0	0	0	0	0	0	15	2	0	0	0	0	0	0	0	0	0	0	0	0	0
268	2	19610201	1	56	145	95	94	-0.1	-0.1		0.25	0.25	83	0	0.25	49	10	0	0	0	0	0	0	0	0	0	0	0	0	0	0	10	0	0	0	0	0	0	0	0	0	0	0	0	0	0
269	2	19380124	12	66	156.5	97.5	106	0.32	0.14		-0.75	-2.5	48	-0.25	-0.25	177	10	0	0	0	0	0	0	0	0	0	0	0	0	0	0	15	2	0	0	0	0	0	0	0	0	0	0	0	0	0
270	1	19420507	13	77	166.5	105	105	0.2	0		1.25	-1.75	80	0	-2	83	31	2	0	0	0	0	0	0	0	0	0	0	0	0	0	37	2	0	2	0	0	0	0	0	0	0	0	0	0	0
271	2	19530202	15	55	153	94	92	0	0.1		0.5	-1.25	87	0.5	-0.75	96	14	0	2	1	0	0	0	0	0	0	0	0	0	0	0	37	2	2	0	0	0	0	0	0	0	0	0	0	0	0
272	2	19480826	3	51	152.5	92	93.5	1.1	0.44		1.5	-2	74	-1.75	-0.25	127	31	2	0	0	0	0	0	0	0	0	0	0	0	0	0	20	2	0	0	0	0	0	0	0	0	0	0	0	0	0
273	1	19491207	15	84	170	104.5	103	1.1	1.3	myopic	-7	-3.25	93	-10.5	-1.5	66	53	6	2	0	1	0	0	0	0	0	0	3	0	2	0	47	5	2	0	0	0	0	0	0	0	0	3	0	2	0
274	2	19480610	17	67	150.5	100	106	0.02	0.04		0.5	-0.75	161	0	0.25	4	31	2	0	1	0	0	0	0	0	0	0	0	0	0	0	20	2	0	0	0	0	0	0	0	0	0	0	0	0	0
275	2	19571228	2	73	162.5	104.5	105	0.94	0.88	myopic	-9.5	-1.75	68	-5.5	-1.5	94	10	0	0	0	0	0	0	0	0	0	0	0	0	0	0	10	0	0	0	0	0	0	0	0	0	0	0	0	0	0
276	2	19460729	15	63	157	96.5	102	0.5	0.36		2.5	1.25	144	2.25	1.5	7	53	6	2	0	0	0	0	0	0	0	0	3	0	3	0	53	6	2	2	0	0	2	0	0	0	0	2	0	0	0
277	2	19640310	12	63.5	159	92	96	0.44	0.7		-3.5	-1.5	88	-3.5	-1.5	91	53	4	2	2	4	0	0	0	0	0	0	0	0	0	0	53	3	2	2	4	0	0	0	0	0	0	0	0	0	0
278	1	19490603	3	54.5	164	96	96	0.26	0.2		0	1.5	13	1.5	-3	72	43	3	2	2	1	0	0	0	0	0	0	0	0	0	0	47	5	2	2	0	0	0	0	0	0	0	0	0	0	0
279	2	19540318	6	79.5	157.5	108	114	0.2	0.2		1.25	1.5	179	0.5	1.75	171	15	2	0	0	0	0	0	0	0	0	0	0	0	0	0	10	0	0	0	0	0	0	0	0	0	0	0	0	0	0
280	1	19510612	19	74	162.5	100	105	0.34	0.44		-1.5	-2.25	82	-0.5	-1.25	99	37	2	2	2	0	0	0	0	0	0	0	0	0	0	0	37	2	2	2	0	0	0	0	0	0	0	0	0	0	0
281	1	19580606	10	88.5	172	100	113	0.1	0.1		0.5	0.75	13	1.25	-2	83	20	2	0	0	0	0	0	0	0	0	0	0	0	0	0	20	2	0	0	0	0	0	0	0	0	0	0	0	0	0
282	1	19491212	4	72	166	97	106	0.14	-0.1		0.75	-1.25	81	0	1.25	8	10	0	0	0	0	0	0	0	0	0	0	0	0	0	0	10	0	0	0	0	0	0	0	0	0	0	0	0	0	0
283	1	19370826	12	62.5	168	94	98	0.24	0.32		1.25	1.25	176	1	1.5	9	20	2	0	0	0	0	0	0	0	0	0	0	0	0	0	20	2	0	0	0	0	0	0	0	0	0	0	0	0	0
284	2	19330101	18	52	156	94.5	95.5	0.7	1.32	myopic	2	-2.75	75	-6.5	-2.25	110	43	4	2	0	0	0	0	0	0	0	0	0	0	0	0	37	2	2	8	8	8	8	8	8	8	8	8	8	8	8
285	2	19400807	16	64.5	148.5	104	100	0.14	0.2		1.75	0.25	153	1.5	0.5	19	37	2	2	0	0	0	0	0	0	0	0	0	0	0	0	31	2	0	0	0	0	0	0	0	0	0	0	0	0	0
286	1	19380420	3	72	172	100	99.5	0.46	0.42		2.5	-5.25	86	0.75	-2.5	88	88	8	8	8	8	8	8	8	8	8	8	8	8	8	8	88	8	8	8	8	8	8	8	8	8	8	8	8	8	8
287	1	19560108	7	64.5	166	95.5	93	0	-0.04		0.75	0.25	28	0.5	0.5	26	10	0	0	0	0	0	0	0	0	0	0	0	0	0	0	10	0	0	0	0	0	0	0	0	0	0	0	0	0	0
288	2	19470726	2	63.5	155	98	100.5	0.2	0.2		0.25	1.5	172	0.25	1	10	10	0	0	0	0	0	0	0	0	0	0	0	0	0	0	10	0	0	0	0	0	0	0	0	0	0	0	0	0	0
289	2	19490302	16	80	161	97	111	0.04	0.06		1.75	-3	94	1.25	-2.25	75	10	0	0	0	0	0	0	0	0	0	0	0	0	0	0	10	0	0	0	0	0	0	0	0	0	0	0	0	0	0
290	2	19430307	6	75	159	110	118.5	0.2	0.3		1.75	-3	161	1.5	0.5	7	10	0	0	0	0	0	0	0	0	0	0	0	0	0	0	10	0	0	0	0	0	0	0	0	0	0	0	0	0	0
291	2	19561123	2	45.5	152.5	84	77	-0.06	-0.1		0	-0.75	68	-0.5	-0.5	66	10	0	0	0	0	0	0	0	0	0	0	0	0	0	0	10	0	0	0	0	0	0	0	0	0	0	0	0	0	0
292	2	19352032	2	63.5	159	99	105	1.2	1.1	myopic	-5.75	-1.25	93	-3.25	-1.5	123	10	0	0	0	0	0	0	0	0	0	0	0	0	0	0	15	2	0	0	0	0	0	0	0	0	0	0	0	0	0
293	2	19550729	4	64	157	99	97	0.54	0.58	myopic	2	-2.5	16	2.5	1.5	85	37	2	2	0	0	0	0	0	0	0	0	0	0	0	0	37	2	2	0	0	0	0	0	0	0	0	0	0	0	0
294	1	19590202	6	75.5	171	96.5	96	0.14	0.2		1.25	0.5	173	1.5	0.5	22	10	0	0	0	0	0	0	0	0	0	0	0	0	0	0	10	0	0	0	0	0	0	0	0	0	0	0	0	0	0
295	2	19400515	6	69	160	102	105	0.2	0.1		1.75	-2.5	79	0.25	2.25	177	31	2	0	0	0	0	0	0	0	0	0	0	0	0	0	31	2	0	0	0	0	0	0	0	0	0	0	0	0	0
296	2	19431025	22	59.5	153	91	95	0.44	0.52					1.25	-3.5	79	88	8	8	8	8	8	8	8	8	8	8	8	8	8	8	88	8	8	8	8	8	8	8	8	8	8	8	8	8	8
297	2	19650405	7	54.5	151.5	96	100	1.22	0.52	myopic	-4.75	-1.25	69	-4	-0.5	112	37	2	2	2	0	0	0	0	0	0	0	0	0	0	0	37	2	2	0	1	0	0	0	0	0	0	0	0	0	0
298	1	19530307	2	80	165	102	105	0.16	0.1		-0.5	-1.75	85	-1.25	-0.5	99	10	0	0	0	0	0	0	0	0	0	0	0	0	0	0	10	0	0	0	0	0	0	0	0	0	0	0	0	0	0
299	1	19471223	8	79.5	166	104.5	108	0.02	0		1.5	-1.75	84	0	-1.25	83	10	0	0	0	0	0	0	0	0	0	0	0	0	0	0	10	0	0	0	0	0	0	0	0	0	0	0	0	0	0
300	1	19470814	4	67	158	99	101	0.54	0.2		-1.25	-0.5	68	-0.75	-1.25	40	65	5	2	0	2	0	0	0	3	3	0	3	0	2	0	65	4	2	2	2	0	0	0	3	0	0	3	0	2	0
301	1	19601018	5	61	168	90.5	92	1.7	1.7	PDR	-2.75	-0.75	74	-1	-2.5	85	65	5	0	0	2	0	0	0	2	2	0	0	0	0	0	71	6	0	0	2	0	0	0	0	0	3	0	0	0	0
302	1	19430529	25	60	176.5	92.5	96.5	0.3	0.64		-3.5	-0.5	39	0.25	-5.5	99	37	2	2	0	0	0	0	0	0	0	0	1	0	0	0	31	2	0	0	0	0	0	0	0	0	0	0	0	0	0
303	2	19560411	2	75	160	102	113	0.12	0.1		0.5	1	176	0	1.75	25	37	2	2	0	0	0	0	0	0	0	0	0	0	0	0	37	2	2	0	0	0	0	0	0	0	0	0	0	0	0
304	1	19381005	1	75	170	101	106	0	0.06		1.5	-2	92	0.75	-2.5	93	10	0	0	0	0	0	0	0	0	0	0	0	0	0	0	10	0	0	0	0	0	0	0	0	0	0	0	0	0	0
305	1	19351005	6	80	171	107.5	113	0.08	-0.04		0.75	-1.5	102	0.25	-0.5	104	88	8	8	8	8	8	8	8	8	8	8	8	8	8	8	20	2	0	0	0	0	0	0	0	0	0	0	0	0	0
306	2	19580406	5	70	149.5	107.5	104.5	0.18	0.16		1.25	0.75	175	1.25	1	22	20	2	0	0	0	0	0	0	0	0	0	0	0	0	0	20	2	0	0	0	0	0	0	0	0	0	0	0	0	0
307	1	19560514	12	61	164.5	92	91	0.2	1.7		0.25	1.25	9				64	4	2	0	0	0	0	0	0	0	0	0	3	0	0	62	2	0	0	0	0	0	0	0	0	0	0	3	0	0
308	2	19380404	9	52	154	90	92	0.18	0.24		0.25	-0.75	21	3	-3.5	70	43	2	0	0	2	0	0	0	0	0	0	0	0	0	0	37	2	2	0	0	0	0	0	0	0	0	0	0	0	0
309	1	19520823	4	69	171	96.5	97.5	0.4	1.7		3.75	1.5	110				10	0	0	0	0	0	0	0	0	0	0	0	0	0	0	10	0	0	0	0	0	0	0	0	0	0	0	0	0	0
310	2	19630308	5	71	155	108	107.5	0.06	0.02		0	-1.5	102	-0.25	-1	84	53	3	2	2	4	0	0	0	0	0	0	2	0	0	0	53	4	2	2	4	0	0	0	0	0	0	0	0	0	0
311	1	19401229	6	86.5	178	103.5	106	0.22	0.22		1	1.75	56	1.75	0.25	27	20	2	0	0	0	0	0	0	0	0	0	0	0	0	0	37	2	0	2	0	0	0	0	0	0	0	0	0	0	0
312	2	19560526	2	59.5	166.5	90	93	0.02	0.04		-0.5	-0.25	74	-0.25	-0.25	97	47	5	2	0	0	0	0	0	0	0	0	0	0	0	0	47	5	2	0	0	0	0	0	0	0	0	0	0	0	0
313	2	19420916	7	58	151	87	100	0.18	1.7		1	1.75	160	2.5	-3	91	10	0	0	0	0	0	0	0	0	0	0	0	0	0	0	10	0	0	0	0	0	0	0	0	0	0	0	0	0	0
314	1	19530510	12	69	167	97	101	0	0		-0.75	-0.25	84	-0.75	-0.5	85	20	2	0	0	0	0	0	0	0	0	0	0	0	0	0	20	2	0	0	0	0	0	0	0	0	0	0	0	0	0
315	2	19460330	13	55	156	91	96	1.7	0.22					1	-2.5	107																31	2	0	0	0	0	0	0	0	0	0	0	0	0	0
316	2	19621017	10	59	159.5	93.5	92	0.14	0.12		0.25	-2.25	94	0.25	-2	89	20	2	0	0	0	0	0	0	0	0	0	0	0	0	0	10	0	0	0	0	0	0	0	0	0	0	0	0	0	0
317	1	19570501	8	81	169	104	105	0.1	0		0	0.25	179	0	-0.75	69	37	2	0	2	0	0	0	0	0	0	0	0	0	0	0	37	2	2	2	0	0	0	0	0	0	0	0	0	0	0
318	1	19511125	6	64.5	165	97.5	96	0.26	0.62		2.5	1	177	3.75	1	19	37	2	2	0	0	0	0	0	0	0	0	0	0	0	0	37	2	2	0	0	0	0	0	0	0	0	0	0	0	0
319	1	19550419	3	54.5	164	89.5	89	0.22	0.12		0.25	-1	37	0	-0.5	137	31	2	0	0	0	0	0	0	0	0	0	0	0	0	0	20	2	0	0	0	0	0	0	0	0	0	0	0	0	0
320	1	19660224	1	68.5	169	95	95	-0.06	0.16		-0.5	-0.5	118	0.25	-1.25	80	20	2	0	0	0	0	0	0	0	0	0	0	0	0	0	10	0	0	0	0	0	0	0	0	0	0	0	0	0	0
321	1	19591006	1	67	177	96.5	87	0	0		0	0.75	87	0.25	-0.75	1	20	2	0	0	0	0	0	0	0	0	0	0	0	0	0	10	0	0	0	0	0	0	0	0	0	0	0	0	0	0
322	1	19500107	1	70	164	93.5	97	0.12	0.2		0	2.75	163	0.25	1.25	10	10	0	0	0	0	0	0	0	0	0	0	0	0	0	0	10	0	0	0	0	0	0	0	0	0	0	0	0	0	0
323	1	19590222	7	79	170	106	104	0	-0.08		0.5	0.25	149	0.25	0.5	65	10	0	0	0	0	0	0	0	0	0	0	0	0	0	0	10	0	0	0	0	0	0	0	0	0	0	0	0	0	0
324	2	19491225	4	62	153	99	104	0.66	0.62	myopic	-0.75	-1.75	79	-2	0	0	20	2	0	0	0	0	0	0	0	0	0	0	0	0	0	15	2	0	0	0	0	0	0	0	0	0	0	0	0	0
325	2	19500504	2	57	159.5	92	96	0.02	0.1		0.25	0.25	179	0	-0.75	78	10	0	0	0	0	0	0	0	0	0	0	0	0	0	0	20	2	0	0	0	0	0	0	0	0	0	0	0	0	0
326	2	19561120	22	62	158.5	97	99.5	0.06	0.06		0	-1	90	-0.75	-1.5	178	37	2	2	2	0	0	0	0	0	0	0	0	0	0	0	37	2	2	1	0	0	0	0	0	0	0	0	0	0	0
327	2	19521026	12	55.5	154	87	95	0.2	0.2		0.25	-4	93	-0.25	-3.75	86	10	0	0	0	0	0	0	0	0	0	0	0	0	0	0	10	0	0	0	0	0	0	0	0	0	0	0	0	0	0
329	1	19410329	4	73	158.5	104.5	108.5	0.2	0.2		0	-1	160	0	-0.75	45	15	2	0	0	0	0	0	0	0	0	0	0	0	0	0	10	0	0	0	0	0	0	0	0	0	0	0	0	0	0
330	2	19360909	3	55	145	99	102.5	0.54	0.48		0.75	1.75	18	0.5	2	176	53	6	2	2	0	0	0	0	0	0	0	0	0	0	0	47	5	2	2	0	0	0	0	0	0	0	0	0	0	0
331	2	19300701	15	56	152	96	97	0.62	1.7	myopic	3	1	170	1.75	3.75	170	10	0	0	0	0	0	0	0	0	0	0	0	0	0	0	15	2	0	0	0	0	0	0	0	0	0	0	0	0	0
332	2	19410126	17	53	148.5	94	97	0.12	0.56		-1.5	-1	89	-4.5	-2.25	108	37	2	2	0	0	0	0	0	0	0	0	1	0	0	0	37	2	2	0	0	0	0	0	0	0	0	1	0	0	0
333	2	19400131	1	65	154.5	105.5	104.5	0.3	0.52		-1	-0.25	146	-1.25	-1	69	10	0	0	0	0	0	0	0	0	0	0	0	0	0	0	88	8	8	8	8	8	8	8	8	8	8	8	8	8	8
334	1	19480512	3	65	164.5	98	99	0.1	1.1		0.5	1.25	171	0.75	0.5	46	10	0	0	0	0	0	0	0	0	0	0	0	0	0	0	10	0	0	0	0	0	0	0	0	0	0	0	0	0	0
335	2	19540524	1	62.5	154.5	100.5	104	0.2	0.2		0.75	1.25	166	0.25	2	38	10	0	0	0	0	0	0	0	0	0	0	0	0	0	0	10	0	0	0	0	0	0	0	0	0	0	0	0	0	0
336	1	19480720	1	78	161.5	107	108.5	0.1	0.1		0.25	0.75	157	0	1.25	4	10	0	0	0	0	0	0	0	0	0	0	0	0	0	0	10	0	0	0	0	0	0	0	0	0	0	0	0	0	0
337	2	19361221	20	89.5	158	118	122	0.44	1.32		1.25	-3.75	83	1.5	1.5	179	10	0	0	0	0	0	0	0	0	0	0	0	0	0	0	12	2	2	0	0	0	0	0	0	0	0	7	0	0	0
338	2	19490706	10	64	158	98.5	98.5	0.36	0.32		0.75	4.75	179	1.5	3.25	2	20	2	0	0	0	0	0	0	0	0	0	0	0	0	0	10	0	0	0	0	0	0	0	0	0	0	0	0	0	0
339	2	19440725	19	52.5	153	93.5	95	0.4	0.3		0.75	1.5	18	1.5	2.75	176	37	2	2	8	8	8	8	8	8	8	8	8	8	8	8	31	2	8	8	8	8	8	8	8	8	8	8	8	8	8
340	2	19471125	10	70	146.5	104	105	0.6	0.62	myopic	2.25	1.5	174	2.25	0.25	6	20	2	0	0	0	0	0	0	0	0	0	0	0	0	0	15	2	0	0	0	0	0	0	0	0	0	0	0	0	0
341	2	19431013	4	72	158.5	105	108	0	0.1		0	0.75	2	0.25	1	14	10	0	0	0	0	0	0	0	0	0	0	0	0	0	0	37	2	2	0	0	0	0	0	0	0	0	0	0	0	0
342	2	19640125	0	63	161.5	101	100	1.24	1.7	myopic maculopathy	-16	0	0				10	0	0	0	0	0	0	0	0	0	0	0	0	0	0	10	0	0	0	0	0	0	0	0	0	0	0	0	0	0
343	2	19500519	10	67	152	99	104.5	0.26	0.32		-0.25	-2.25	84	0.5	-1.75	105	31	2	0	0	0	0	0	0	0	0	0	0	0	0	0	37	2	2	0	0	0	0	0	0	0	0	0	0	0	0
344	2	19561202	6	53	156	98	90	0.04	0.1		0	-0.25	91	0.5	-0.5	91	20	2	0	0	0	0	0	0	0	0	0	0	0	0	0	10	0	0	0	0	0	0	0	0	0	0	0	0	0	0
345	2	19540925	5	67	157	102	101	0.26	0.26		0.75	-1	64	0.5	-1	116	10	0	0	0	0	0	0	0	0	0	0	0	0	0	0	10	0	0	0	0	0	0	0	0	0	0	0	0	0	0
346	2	19501223	2	63	158	97	93	0.12	0.14		-1.75	-3.25	130	1.25	-2.25	70	10	0	0	0	0	0	0	0	0	0	0	0	0	0	0	15	2	0	0	0	0	0	0	0	0	0	0	0	0	0
347	2	19520129	12	61	162	100	94	0.12	0.04		0	0.5	122	0	-0.5	50	53	6	2	0	0	0	0	0	0	0	0	3	0	0	0	53	6	2	0	0	0	0	0	0	0	0	3	0	2	0
348	2	19621101	3	74	156	114	109	0.24	1.7		0	-0.25	8	-11.25	-2	143	20	2	0	0	0	0	0	0	0	0	0	0	0	0	0	88	8	8	8	8	8	8	8	8	8	8	8	8	8	8
349	2	19480126	5	70	156	104	98	1.7	1.3	myopic maculopathy	-16.5	-0.25	70	-16	0	0	10	0	0	0	0	0	0	0	0	0	0	0	0	0	0
350	2	19520101	7	64	154	97	100	0.06	0		0	-0.5	83	0	-0.75	104	10	0	0	0	0	0	0	0	0	0	0	0	0	0	0	10	0	0	0	0	0	0	0	0	0	0	0	0	0	0
351	1	19600507	4	79	167	100	93	-0.02	-0.02		0.75	0.75	173	0.75	1	5	10	0	0	0	0	0	0	0	0	0	0	0	0	0	0	10	0	0	0	0	0	0	0	0	0	0	0	0	0	0
352	2	19531202	3	54	153.5	93	86	0.12	0.04		0	-0.25	155	0.5	0.25	60	31	2	0	0	0	0	0	0	0	0	0	0	0	0	0	10	0	0	0	0	0	0	0	0	0	0	0	0	0	0
353	2	19500228	6	60	154.5	94	88	0.2	0.26		0.75	-2	96	0.75	-1.75	91	20	2	0	0	0	0	0	0	0	0	0	0	0	0	0	13	1	0	0	0	0	0	0	0	0	0	0	0	0	0
354	2	19510524	13	53	158	95	93	0.4	0.4		1	-3.75	95	-1.75	-1	57	20	2	0	0	0	0	0	0	0	0	0	0	0	0	0	37	2	2	2	1	0	0	0	0	0	0	0	0	0	0
355	1	19400727	10	80	166	109	107	0.02	1		0.5	1.75	164	0.25	0.75	144	20	2	0	0	0	0	0	0	0	0	0	0	0	0	0	20	2	0	0	1	0	0	0	0	0	0	0	0	0	0
356	2	19570416	5	68	159	104	98	0.16	0.34		0.75	0.75	172	0.25	1	173	10	0	0	0	0	0	0	0	0	0	0	0	0	0	0	10	0	0	0	0	0	0	0	0	0	0	0	0	0	0
357	2	19501220	3	53	153	95	90	0.02	0.02		0.5	-2.25	82	1	-1.5	90	37	2	0	2	0	0	0	0	0	0	0	0	0	0	0	15	2	0	0	0	0	0	0	0	0	0	0	0	0	0
358	2	19510415	4	79.5	156	114	105	0.26	0.42		1.75	0.5	3	1	0.75	60	20	2	0	0	0	0	0	0	0	0	0	0	0	0	0	10	0	0	0	0	0	0	0	0	0	0	0	0	0	0
359	2	19520612	6	70	160	107	105	0.3	0.16		-0.25	-2	89	-0.75	-2.75	87	10	0	0	0	0	0	0	0	0	0	0	0	0	0	0	10	0	0	0	0	0	0	0	0	0	0	0	0	0	0
360	2	19680212	3	61	156	99	93	0.04	0.1		-0.75	-0.75	85	-0.75	-0.75	103	10	0	0	0	0	0	0	0	0	0	0	0	0	0	0	10	0	0	0	0	0	0	0	0	0	0	0	0	0	0
361	1	19540217	5	94	175	111	106	0.02	0		0.25	0.75	134	0.5	-0.75	158	20	2	0	0	0	0	0	0	0	0	0	0	0	0	0	13	1	0	0	0	0	0	0	0	0	0	0	0	0	0
362	2	19450408	4	66	158	102	105	1.2	0.7	myopic	-3	-1	55	-5.25	-0.5	150	31	2	0	0	0	0	0	0	0	0	0	0	0	0	0	10	0	0	0	0	0	0	0	0	0	0	0	0	0	0
363	1	19490718	1	66	156	100	95	0.42	0.34		2	0.5	172	1.75	1.25	178	20	2	0	0	0	0	0	0	0	0	0	0	0	0	0	20	2	0	0	0	0	0	0	0	0	0	0	0	0	0
364	2	19420527	26	56	155	97	91	0.3	0.52		0	3.75	167	1.5	-4.25	81	88	8	8	8	8	8	8	8	8	8	8	8	8	8	8	37	2	2	0	0	0	0	0	0	0	0	0	0	0	0
365	2	19480607	15	60	155	102	100	0.3	0.1		-0.75	-0.5	149	-0.25	-0.5	90	53	6	2	2	2	0	0	0	0	0	0	3	0	2	0	53	6	2	2	2	0	0	0	0	0	0	3	0	2	0
366	2	19421229	8	54	146	97	93	0.32	0.2		-2	-2.25	14	-1.25	-0.75	79	10	0	0	0	0	0	0	0	0	0	0	0	0	0	0	10	0	0	0	0	0	0	0	0	0	0	0	0	0	0
367	1	19691127	1	68	165	103	96	0.42	0.32		-2	-0.5	62	-1.75	-2.5	179	20	2	0	0	0	0	0	0	0	0	0	0	0	0	0	20	2	0	0	0	0	0	0	0	0	0	0	0	0	0
368	1	19570611	4	60	158.5	95	94	0.42	0.2		-1.25	-2	67	-1	-0.75	99	10	0	0	0	0	0	0	0	0	0	0	0	0	0	0	10	0	0	0	0	0	0	0	0	0	0	0	0	0	0
369	1	19420702	3	68.5	152	99	102	0.1	0.06		1	-1.25	72	0.5	-1.75	103	10	0	0	0	0	0	0	0	0	0	0	0	0	0	0	10	0	0	0	0	0	0	0	0	0	0	0	0	0	0
370	2	19380516	0	62	157.6	95	100	0.14	0.02		0.75	-1	32	0	-0.25	111	14	0	2	0	0	0	0	0	0	0	0	0	0	0	0	10	0	0	0	0	0	0	0	0	0	0	0	0	0	0
371	1	19561230	8	102	185.5	109	109	0.4	0.44		-0.5	-0.5	177	-0.25	-0.25	178	37	2	0	2	0	0	0	0	0	0	0	0	0	0	0	31	2	0	0	1	0	0	0	0	0	0	0	0	0	0
372	2	19510519	7	70	147.5	109	109.5	0.62	0.42		-3	-1.75	61	-0.75	-1.5	97	37	2	2	0	0	0	0	0	0	0	0	0	0	0	0	43	3	2	0	0	0	0	0	0	0	0	0	0	0	0
373	1	19390429	4	81	164	106	106.5	0.32	0.12		1.25	-2	56	0.75	-1.75	83	37	2	0	2	0	0	0	0	0	0	0	0	0	0	0	37	2	0	2	0	0	0	0	0	0	0	0	0	0	0
374	1	19530218	10	62	162.5	97	99	-0.04	-0.02		0	-0.25	86	0.5	-1	68	10	0	0	0	0	0	0	0	0	0	0	0	0	0	0	10	0	0	0	0	0	0	0	0	0	0	0	0	0	0
375	1	19451214	10	65	158	92	92	0.04	0.04		0.5	-1.75	84	-0.25	-0.25	54	37	2	2	0	0	0	0	0	0	0	0	0	0	0	0	20	2	0	0	0	0	0	0	0	0	0	0	0	0	0
376	2	19470616	16	62.5	156.5	95	103	0.24	0.66		1.25	-2.5	103	1.25	-3.75	100	63	2	0	0	0	0	0	0	0	0	0	3	3	2	3	63	2	0	0	0	0	0	0	0	0	0	3	3	2	0
377	2	19451215	3	54.5	160.5	91.5	88	1.1	0.42		-6	-3.75	47	-1	-2.25	96	20	2	0	0	0	0	0	0	0	0	0	0	0	0	0	10	0	0	0	0	0	0	0	0	0	0	0	0	0	0
378	2	19480712	9	63	155	101	106	0.5	0.32		-1.25	-2.25	88	-0.75	-2	83	20	2	0	0	0	0	0	0	0	0	0	0	0	0	0	20	2	0	0	0	0	0	0	0	0	0	0	0	0	0
379	1	19390617	20	66.5	161	100	99	0.22	0.32		0.5	1.75	152	0.75	0.5	160	14	0	0	2	0	0	0	0	0	0	0	0	0	0	0	31	2	0	1	0	0	0	0	0	0	0	0	0	0	0
380	2	19650903	4	46.5	148	88.5	87	0.1	0		0.75	0.25	6	0.75	0.75	168	10	0	0	0	0	0	0	0	0	0	0	0	0	0	0	10	0	0	0	0	0	0	0	0	0	0	0	0	0	0
382	1	19470405	20	80	173	103	102	0.14	0.04		-2	-0.75	100	-0.75	-0.75	90	37	2	2	0	0	0	0	0	0	0	0	0	0	0	0	37	2	2	0	0	0	0	0	0	0	0	0	0	0	0
383	2	19600601	3	60	157.5	97	94	0.06	0.34		0.25	0.5	29	3.25	-5.25	133	20	2	0	0	0	0	0	0	0	0	0	0	0	0	0	20	2	0	0	0	0	0	0	0	0	0	0	0	0	0
384	1	19290421	5	52	154	91	94	0.3	0.2		2	-2.25	98	-2.5	-1.75	180	88	8	8	8	8	8	8	8	8	8	8	8	8	8	8	88	8	8	8	8	8	8	8	8	8	8	8	8	8	8
385	2	19601003	8	80	165	110	109	0.2	0.2		0	1	8	0.75	-1.25	102	31	2	0	0	1	0	0	0	0	0	0	0	0	0	0	31	2	0	0	0	0	0	0	0	0	0	0	0	0	0
386	2	19630813	10	68	160	95	97	0	0.12		0.25	-1.25	85	0.5	-1.5	82	10	0	0	0	0	0	0	0	0	0	0	0	0	0	0	10	0	0	0	0	0	0	0	0	0	0	0	0	0	0
387	2	19450802	10	64.5	154	106	108	0.1	0.3		1.5	-1.75	96	1.25	-1.75	83	43	3	2	2	1	0	0	0	0	0	0	2	0	0	0	47	5	2	2	0	0	0	0	0	0	0	0	0	0	0
388	2	19510408	12	52.5	153	90.5	91.5	0.08	0.2		0.25	1	180	0.5	1	167	20	2	0	0	0	0	0	0	0	0	0	0	0	0	0	10	0	0	0	0	0	0	0	0	0	0	0	0	0	0
389	2	19450312	8	67	153.5	101	108	1.5	1.7	myopic	-17	-0.25	96	-18	-2.25	77	10	0	0	0	0	0	0	0	0	0	0	0	0	0	0	10	0	0	0	0	0	0	0	0	0	0	0	0	0	0
390	2	19530224	12	71	159	102	102.5	1.2	1.1	myopic maculopathy	-16.25	-4.5	81	-15.75	-2	126	10	0	0	0	0	0	0	0	0	0	0	0	0	0	0	13	1	1	0	0	0	0	0	0	0	0	0	0	0	0
391	2	19330919	24	61	153.5	94.5	102	1.3	1.24	diabetic maculopathy	0.75	2.75	170	0.75	2	38	64	4	2	0	0	0	0	0	0	0	0	3	3	2	0	63	2	2	0	0	0	0	0	0	0	0	3	3	2	0
392	2	19510422	5	71	163.5	98	99	0.18	0.36		0.75	-1	112	0.25	-0.5	101	37	2	2	0	0	0	0	0	0	0	0	0	0	0	0	31	2	0	0	0	0	0	0	0	0	0	0	0	0	0
393	2	19580727	0	42	142	86.5	85.5	-0.1	-0.04		0	0.25	144	0.25	-0.75	81	10	0	0	0	0	0	0	0	0	0	0	0	0	0	0	10	0	0	0	0	0	0	0	0	0	0	0	0	0	0
394	1	19520701	1	67.5	160	95	96	0.62	0		-5.5	-1	10	0	-1.75	177	13	1	0	0	0	0	0	0	0	0	0	0	0	0	0	10	0	0	0	0	0	0	0	0	0	0	0	0	0	0
395	1	19520106	6	64.5	164	99	98	-0.08	-0.06		0	-0.5	80	0.25	-1	93	10	0	0	0	0	0	0	0	0	0	0	0	0	0	0	20	2	0	0	0	0	0	0	0	0	0	0	0	0	0
396	2	19520226	7	59	153.5	99	99	1.24	1.24	myopic	-4.5	-0.5	54	-9	-1	174	31	2	0	0	0	0	0	0	0	0	0	0	0	0	0	31	2	0	0	0	0	0	0	0	0	0	0	0	0	0
397	2	19430309	10	51	148.5	93	98	1.6	0.3		0	0.75	140	0.75	-1.25	102	31	2	1	0	0	0	0	0	0	0	0	0	0	0	0	37	2	0	2	0	0	0	0	0	0	0	0	0	0	0
398	2	19440414	7	49.5	153	90	87.5	0.7	0.7	myopic	2.75	1	1	2.75	0.5	20	20	2	0	0	0	0	0	0	0	0	0	0	0	0	0	20	2	0	0	0	0	0	0	0	0	0	0	0	0	0
399	2	19561107	0	71	160	105	104	0.3	0.32		-0.75	-0.75	80	-0.75	-0.75	116	10	0	0	0	0	0	0	0	0	0	0	0	0	0	0	10	0	0	0	0	0	0	0	0	0	0	0	0	0	0
400	1	19601017	1	69.5	171	100	99	0.2	0.3		-1	-1	96	-1	-0.75	89	20	2	0	0	0	0	0	0	0	0	0	0	0	0	0	20	2	0	0	0	0	0	0	0	0	0	0	0	0	0
401	1	19520816	10	83	173	106	102	0.6	0.72	myopic	0.25	-0.5	157	0.5	0.25	87	10	0	0	0	0	0	0	0	0	0	0	0	0	0	0	31	2	0	0	0	0	0	0	0	0	0	0	0	0	0
402	2	19461203	4	53	142	96	97	0.24	0.16		-1	-1.25	48	-0.25	-1.75	110	10	0	0	0	0	0	0	0	0	0	0	0	0	0	0	10	0	0	0	0	0	0	0	0	0	0	0	0	0	0
403	2	19380205	13	50	150	93	90	0.24	0.26		1.25	2.75	166	1.75	2.25	166	31	2	0	0	0	0	0	0	0	0	0	0	0	0	0	10	0	0	0	0	0	0	0	0	0	0	0	0	0	0
404	2	19491201	3	42	150	88	88	1.7	1.7	PDR							85	2	8	8	8	8	8	3	8	3	3	8	0	8	8	85	2	2	0	0	0	2	0	0	0	3	8	0	8	8
405	1	19520624	2	58	165	97	88	1.6	1.7	PDR	1	2	10	4.25	2.5	154	85	2	2	0	0	0	0	3	3	4	3	8	0	8	8	65	2	2	0	0	0	0	0	2	0	0	3	0	2	0
406	2	19581208	15	68	155	100	90	1.22	1.4	myopic	1.5	2.25	178	1.5	1.5	2	43	2	0	2	2	0	0	0	0	0	0	0	0	0	0	47	2	0	2	3	0	0	0	0	0	0	0	0	0	0
407	2	19540321	4	48	153	90	85	1.3	0.7	myopic	-7.5	-2	25	-4.5	-3	155	10	0	0	0	0	0	0	0	0	0	0	0	0	0	0	10	0	0	0	0	0	0	0	0	0	0	0	0	0	0
408	1	19521013	4	79	166	107	102	0.32	0.32		-0.75	-2	82	-1.25	-2	105	10	0	0	0	0	0	0	0	0	0	0	0	0	0	0	10	0	0	0	0	0	0	0	0	0	0	0	0	0	0
409	2	19391102	3	57	150.5	98	98	0.06	0.12		1	-2.25	67	0.5	-1.75	119	31	2	0	0	0	0	0	0	0	0	0	0	0	0	0	88	8	8	8	8	8	8	8	8	8	8	8	8	8	8
410	1	19700314	5	94	173.5	110	111	-0.1	-0.2		-0.25	-0.25	120	-0.25	-0.25	124	20	2	0	0	0	0	0	0	0	0	0	0	0	0	0	10	0	0	0	0	0	0	0	0	0	0	0	0	0	0
411	1	19480509	2	48	162	82.5	82.5	0.3	0.3		1	1	4	0	2.25	170	20	2	0	0	0	0	0	0	0	0	0	0	0	0	0	10	0	0	0	0	0	0	0	0	0	0	0	0	0	0
412	1	19570121	15	90	175	105	105	0.1	0.1		-0.25	-1.5	2	0.25	-1.25	28	10	0	0	0	0	0	0	0	0	0	0	0	0	0	0	10	0	0	0	0	0	0	0	0	0	0	0	0	0	0
413	2	19611122	1	63	155	97.5	97	-0.16	-0.12		0.25	0.25	21	0.5	0	0	20	2	0	0	0	0	0	0	0	0	0	0	0	0	0	20	2	0	0	0	0	0	0	0	0	0	0	0	0	0
414	2	19520203	1	69	163.5	101	103	-0.1	-0.06		0	-1.75	91	0	-1.75	89	10	0	0	0	0	0	0	0	0	0	0	0	0	0	0	10	0	0	0	0	0	0	0	0	0	0	0	0	0	0
415	2	19310430	12	66	151.5	108	108	1.18	1.1	myopic	0	1	8	0	-0.5	93	37	2	2	0	0	0	0	0	0	0	0	0	0	0	0	10	0	0	0	0	0	0	0	0	0	0	0	0	0	0
416	2	19550419	6	47.5	152	88	89	0.1	0.1		1	1.75	7	1	1.25	164	37	2	0	2	0	0	0	0	0	0	0	0	0	0	0	37	2	2	0	0	0	0	0	0	0	0	3	0	2	0
417	1	19541108	5	80	170	104	103	0.1	-0.1		0.5	0.5	176	0.5	0.75	8	20	2	0	0	0	0	0	0	0	0	0	0	0	0	0	10	0	0	0	0	0	0	0	0	0	0	0	0	0	0
418	2	19480922	5	67	148.5	103	104.5	0.52	0.4		-2.75	-1.25	70	-1	-1	96	31	2	0	0	0	0	0	0	0	0	0	0	0	0	0	37	2	2	2	0	0	0	0	0	0	0	1	0	0	0
419	2	19491124	14	64	161.5	97	101	0.2	0.22		-0.25	-2	68	0.75	-1.25	76	31	2	0	0	0	0	0	0	0	0	0	0	0	0	0	10	0	0	0	0	0	0	0	0	0	0	0	0	0	0
420	2	19510314	12	59	148	89	102	0.4	0.46		-3.75	-2.75	70	0	-1	113	47	5	2	2	0	0	0	0	0	0	0	3	0	2	0	53	6	2	2	0	0	0	0	0	0	0	3	0	2	0
421	2	19631223	12	70	152	98	99	0.52	0.32		-1.75	-0.75	176	-1.5	-1.75	7	53	6	2	2	2	0	0	0	0	0	0	2	0	0	0	53	6	0	2	1	0	0	0	0	0	0	0	0	0	0
422	1	19310719	12	69	164	97	103	0.18	0.28		-0.25	-3.5	36	-1	-1.5	109	88	8	8	8	8	8	8	8	8	8	8	8	8	8	8	10	0	0	0	0	0	0	0	0	0	0	0	0	0	0
423	2	19610224	7	57	145	100	102	0.12	0.16		-0.25	-1.75	82	0	-2	89	37	2	2	2	0	0	0	0	0	0	0	0	0	0	0	37	2	2	0	0	0	0	0	0	0	0	0	0	0	0
424	2	19640719	3	54	148	91	87	1.1	0.42		-4.25	-0.5	107	-3	-0.5	55	37	2	0	2	0	0	0	0	0	0	0	0	0	0	0	37	3	2	2	0	0	0	0	0	0	0	1	0	0	0
425	2	19500218	16	70	160	107	104	-0.08	0.02		0	1.25	3	0.25	1.75	174	37	2	0	2	0	0	0	0	0	0	0	0	0	0	0	37	2	2	0	0	0	0	0	0	0	0	0	0	0	0
426	1	19471107	13	75	163	98	98	0.66	0.54	myopic	-3	-1.5	79	-2	-0.5	117	10	0	0	0	0	0	0	0	0	0	0	0	0	0	0	31	2	0	0	0	0	0	0	0	0	0	0	0	0	0
427	2	19560613	12	71	164	102	100	-0.08	-0.1		0.5	-0.75	86	0.5	-1	118	37	2	2	0	0	0	0	0	0	0	0	0	0	0	0	31	2	0	0	0	0	0	0	0	0	0	0	0	0	0
428	1	19370318	4	70	160	104	100	-0.06	1.7		1.25	-2	78				10	0	0	0	0	0	0	0	0	0	0	0	0	0	0	10	0	0	0	0	0	0	0	0	0	0	0	0	0	0
429	2	19471215	6	66	157	101	99	-0.04	-0.06		0.25	-0.75	100	0	1	180	10	0	0	0	0	0	0	0	0	0	0	0	0	0	0	15	2	0	0	0	0	0	0	0	0	0	0	0	0	0
430	2	19501107	8	59	153	97	90	0.5	0.4		1.25	0.5	13	0.75	0.5	145	10	0	0	0	0	0	0	0	0	0	0	0	0	0	0	20	2	0	0	0	0	0	0	0	0	0	0	0	0	0
431	1	19490823	5	103	172	116	121	0.02	0.08		2.75	-1.75	168	1	-0.25	152	10	0	0	0	0	0	0	0	0	0	0	0	0	0	0	10	0	0	0	0	0	0	0	0	0	0	0	0	0	0
432	1	19620217	3	65.5	178	97	95	-0.06	-0.1		0	0	0	0.25	-0.25	77	10	0	0	0	0	0	0	0	0	0	0	0	0	0	0	10	0	0	0	0	0	0	0	0	0	0	0	0	0	0
433	2	19530727	18	86	164.5	106	115	0.3	0.1		3	-1.75	81	1.75	-1.25	86	37	2	2	0	0	0	0	0	0	0	0	1	0	0	0	43	2	0	0	2	0	0	0	0	0	0	0	0	0	0
434	2	19441002	18	53.5	149.5	95	96.5	0.02	0.22		2	-1.5	91	2.5	-1.25	103	37	2	2	0	0	0	0	0	0	0	0	0	0	0	0	31	2	0	0	0	0	0	0	0	0	0	0	0	0	0
435	2	19420523	3	72	161.5	104	110	0.62	0.46		-1.25	-2	123	-1	-0.5	121	10	0	0	0	0	0	0	0	0	0	0	0	0	0	0	10	0	0	0	0	0	0	0	0	0	0	0	0	0	0
436	1	19480815	15	66	167	97	94.5	-0.04	1.7		0.25	-1	86	-0.5	-1.25	82	37	2	2	0	0	0	0	0	0	0	0	0	0	0	0	88	8	8	8	8	8	8	8	8	8	8	8	8	8	8
437	2	19500825	9	59	157	93	92	0.04	0.08		2.25	-1.75	85	1.75	-1.5	94	31	2	0	0	0	0	0	0	0	0	0	0	0	0	0	31	2	0	0	0	0	0	0	0	0	0	0	0	0	0
438	1	19480301	5	75	166	103	108	0.2	0.2		0	-0.75	18	1.5	-0.75	77	10	0	0	0	0	0	0	0	0	0	0	0	0	0	0	10	0	0	0	0	0	0	0	0	0	0	0	0	0	0
439	2	19560501	11	49.5	150	89	87	0.32	0.2		0.25	-1	86	0.75	-1	105	37	2	2	0	0	0	0	0	0	0	0	0	0	0	0	43	2	2	0	2	0	0	0	0	0	0	0	0	0	0
440	2	19550625	15	57	149.5	94.5	91	0.42	0.52		-0.25	-1.75	84	-1.75	-0.75	66	31	2	0	0	0	0	0	0	0	0	0	0	0	0	0	37	2	2	0	0	0	0	0	0	0	0	0	0	0	0
441	1	19480602	12	61.5	161.5	101	89	0.06	0.3		0.25	-0.75	48	1.25	-0.75	135	47	3	2	2	2	0	0	0	0	0	0	0	0	0	0	43	2	2	2	2	0	0	0	0	0	0	1	0	0	0
442	1	19410216	8	81	171	105	107	0.36	0.2		2.75	-1.75	84	2	-1.25	93	37	2	0	2	0	0	0	0	0	0	0	0	0	0	0	43	2	0	0	2	0	1	0	0	0	0	0	0	0	0
443	2	19460830	6	74	152	103	112	-0.04	-0.02		1.25	-1.25	73	0.75	-1	98	10	0	0	0	0	0	0	0	0	0	0	0	0	0	0	10	0	0	0	0	0	0	0	0	0	0	0	0	0	0
444	2	19420314	15	67	158	101	104	0.1	0.12		0.75	-1	91	1.75	-1.75	81	31	2	0	0	0	0	0	0	0	0	0	0	0	0	0	31	2	0	0	0	0	0	0	0	0	0	0	0	0	0
446	2	19380322	6	75	157	118	116	0.62	0.3		0.25	-1.25	69	0	-0.25	88	88	8	8	8	8	8	8	8	8	8	8	8	8	8	8	88	8	8	8	8	8	8	8	8	8	8	8	8	8	8
447	2	19470803	8	47	144	91	93	0.06	0.06		0	-1	79	-0.25	-0.75	101	10	0	0	0	0	0	0	0	0	0	0	0	0	0	0	10	0	0	0	0	0	0	0	0	0	0	0	0	0	0
448	1	19500727	5	81	165	103	104	0.3	1.3		-2.5	-0.5	73	-0.75	-3	13	20	2	0	0	0	0	0	0	0	0	0	0	0	0	0	10	0	0	0	0	0	0	0	0	0	0	0	0	0	0
449	2	19450818	10	66	158	104	102	0.7	1.1	myopic	-1	-1.5	114	-1.75	-0.5	44	31	2	0	0	0	0	0	0	0	0	0	0	0	0	0	37	2	0	2	0	0	0	0	0	0	0	0	0	0	0
450	2	19500311	12	60	157	99	95	0.1	0.1		2.75	-1	92	2.75	-1.5	88	20	2	0	0	0	0	0	0	0	0	0	0	0	0	0	20	2	0	0	0	0	0	0	0	0	0	0	0	0	0
451	2	19350815	9	55	150	97	94	1.22	1.14	myopic	3	-0.75	53	3.75	-0.75	127	43	4	2	0	0	0	0	0	0	0	0	3	0	2	0	47	5	2	0	0	0	0	0	0	0	0	3	0	2	0
452	2	19360607	10	58.5	147.5	96	99.5	0.32	0.32		2.75	-0.5	78	2.5	-0.5	104	10	0	0	0	0	0	0	0	0	0	0	0	0	0	0	10	0	0	0	0	0	0	0	0	0	0	0	0	0	0
453	1	19511007	0	77	172	103	98	0.3	-0.08		-0.75	-1.25	87	1.5	-1	77	37	2	0	2	0	0	0	0	0	0	0	0	0	0	0	20	2	0	0	0	0	0	0	0	0	0	0	0	0	0
454	1	19490821	4	76	171	100	96	1.1	0		-2.5	-3	87	2	-2.25	91	10	0	0	0	0	0	0	0	0	0	0	0	0	0	0	10	0	0	0	0	0	0	0	0	0	0	0	0	0	0
455	1	19420807	3	59	160	94	94	1.1	0.4		-4.25	-2	96	-0.75	-1.5	86	88	8	8	8	8	8	8	8	8	8	8	8	8	8	8	10	0	0	0	0	0	0	0	0	0	0	0	0	0	0
457	2	19530715	1	76	155	106	111	0.14	0.26		1.75	-1.25	92	1.75	-0.25	95	10	0	0	0	0	0	0	0	0	0	0	0	0	0	0	10	0	0	0	0	0	0	0	0	0	0	0	0	0	0
458	2	19570701	18	57	160	99	98.5	1.7	0.42					-0.5	-1.5	72																60	2	0	0	0	0	0	0	0	4	0	0	0	0	0
459	1	19380518	1	74	161	101	104	0.02	0.68		1	-0.5	107	-4.5	-2.5	4	10	0	0	0	0	0	0	0	0	0	0	0	0	0	0	88	8	8	8	8	8	8	8	8	8	8	8	8	8	8
460	2	19370119	5	73.5	150	110	112	0.18	0.32		2.25	-1.5	94	3	-1.5	104	43	4	2	0	0	0	0	0	0	0	0	1	0	0	0	53	6	2	2	0	0	0	0	0	0	0	3	0	2	0
461	2	19400416	4	48	153	91	93	0.62	0.2		1	-3.5	84	-0.25	-0.75	102	88	8	8	8	8	8	8	8	8	8	8	8	8	8	8	88	8	8	8	8	8	8	8	8	8	8	8	8	8	8
462	2	19510217	14	60	151	97.5	99	0.58	0.6	myopic	-3.25	-1.5	89	-3.25	-0.5	110	15	2	0	0	0	0	0	0	0	0	0	0	0	0	0	10	0	0	0	0	0	0	0	0	0	0	0	0	0	0
463	1	19501207	5	93.5	176.5	109	110	0.22	0.2		0.25	-1	102	0	-1.5	91	10	0	0	0	0	0	0	0	0	0	0	0	0	0	0	10	0	0	0	0	0	0	0	0	0	0	0	0	0	0
464	2	19520820	7	66.5	161	95.5	97	0.14	0.04		1.5	-1.25	94	1.25	-1.5	80	53	3	2	0	4	0	0	0	1	0	0	3	0	2	0	53	3	2	0	4	0	0	0	0	0	0	3	0	2	0
465	2	19450701	10	72	159	105	108	0.22	0.22		2.75	-2.5	84	2.25	-2.25	100	10	0	0	0	0	0	0	0	0	0	0	0	0	0	0	10	0	0	0	0	0	0	0	0	0	0	0	0	0	0
466	1	19480728	0	60	167	92	91	0.02	0.08		1.5	-0.25	103	1	-1.25	35	20	2	0	0	0	0	0	0	0	0	0	0	0	0	0	10	0	0	0	0	0	0	0	0	0	0	0	0	0	0
467	2	19520908	6	62.5	161.5	93	96	0.3	0.22		2	-2	82	1.75	-2	90	12	2	0	0	0	0	0	0	0	0	0	0	0	0	0	10	0	0	0	0	0	0	0	0	0	0	0	0	0	0
468	2	19550912	18	59.5	158	97	93	0.54	1.7	diabetic maculopathy	1.5	-0.5	79	1.75	-0.75	62	63	2	2	0	0	0	0	0	0	0	0	3	3	0	0	63	2	2	0	0	0	0	0	0	0	0	3	3	2	3
469	2	19510207	21	76.5	158.5	105	110	0.2	0.16		2	-2	91	1.5	-1.25	74	47	5	2	2	0	0	0	0	0	0	0	3	0	2	0	53	5	2	2	4	0	0	0	0	0	0	3	0	2	0
470	1	19371212	4	59	165	90.5	91	1.42	0.14					3.25	-0.75	97																37	2	2	0	0	0	0	0	0	0	0	0	0	0	0
471	1	19551026	6	72	171.5	98	87	0.1	0.1		1.25	-0.75	68	1	-0.5	112	20	2	0	0	0	0	0	0	0	0	0	0	0	0	0	20	2	0	0	0	0	0	0	0	0	0	0	0	0	0
472	1	19540713	10	67.5	167	95	101	0.16	0.04		2	-0.75	85	1.25	-0.5	63	31	2	0	0	0	0	0	0	0	0	0	0	0	0	0	31	2	0	0	0	0	0	0	0	0	0	0	0	0	0
473	1	19521228	18	70	165	98	91	0.16	0.06		1	-1.5	107	1	-0.75	87	47	4	2	2	2	0	0	0	0	0	0	3	0	2	0	47	3	2	2	2	0	0	0	0	0	0	3	0	2	0
474	2	19421016	2	60	153.5	99	100	0.1	0.1		1.5	-1.75	93	1.75	-1	91	37	2	0	2	0	0	0	0	0	0	0	0	0	0	0	31	2	0	0	0	0	0	0	0	0	0	0	0	0	0
475	2	19541208	10	45	157	86.5	86	0.04	-0.06		1	-1	11	1.25	-0.5	97	37	2	2	0	0	0	0	0	0	0	0	3	0	2	0	37	2	2	0	0	0	0	0	0	0	0	0	0	0	0
476	2	19600704	6	52.5	153.5	91	89.5	0.06	0.1		0.75	-1	103	1	-1	101	10	0	0	0	0	0	0	0	0	0	0	0	0	0	0	10	0	0	0	0	0	0	0	0	0	0	0	0	0	0
477	1	19550926	10	65	172	94.5	96	0.02	0.04		0.25	-0.5	49	0	-0.75	96	37	2	2	2	0	0	0	0	0	0	0	0	0	0	0	37	2	0	2	0	0	0	0	0	0	0	0	0	0	0
478	2	19561009	15	79.5	153	108	113.5	0.22	0.1		1.5	-0.75	77	1.5	-1	99	37	2	2	0	0	0	0	0	0	0	0	2	0	0	0	37	2	2	2	0	0	0	0	0	0	0	2	0	0	0
479	2	19480429	3	59	148	85	101.5	0.4	0.3		3.25	-2.5	72	3	-2	90	10	0	0	0	0	0	0	0	0	0	0	0	0	0	0	10	0	0	0	0	0	0	0	0	0	0	0	0	0	0
480	2	19510718	13	69	159.5	99	104	0.26	1.1		3.5	-1.5	79	4.25	-2.25	96	10	0	0	0	0	0	0	0	0	0	0	0	0	0	0	37	2	2	0	0	0	0	0	0	0	0	0	0	0	0
481	2	19480605	1	63	162	95	97	0.46	0.24		0.25	-2.75	88	-0.25	-2.5	97	37	2	2	2	0	0	0	0	0	0	0	3	0	2	0	31	2	0	0	0	0	0	0	0	0	0	0	0	0	0
482	2	19510317	5	66.5	153	93	97	-0.06	-0.08		0.25	-0.25	76	0.75	-0.5	107	88	8	8	8	8	8	8	8	8	8	8	8	8	8	8	10	0	0	0	0	0	0	0	0	0	0	0	0	0	0
483	2	19420106	17	60	151	96	99	0.58	1.1	myopic	0.75	-3	95	3.5	-3.5	93	31	2	0	0	0	0	0	0	0	0	0	0	0	0	0	31	2	0	0	0	0	0	0	0	0	0	0	0	0	0
485	1	19450215	2	67	160	105	106	-0.1	0.14		0.25	0	0	1.5	-1.25	94	10	0	0	0	0	0	0	0	0	0	0	0	0	0	0	20	2	0	0	0	0	0	0	0	0	0	0	0	0	0
486	2	19531129	20	63	150.5	99	101	0	0		0.75	-0.75	76	1	-0.5	96	10	0	0	0	0	0	0	0	0	0	0	0	0	0	0	10	0	0	0	0	0	0	0	0	0	0	0	0	0	0
487	2	19530227	2	56	152	93	95	0.12	0.14		2.25	-0.25	145	1.75	-0.25	65	20	2	0	0	0	0	0	0	0	0	0	0	0	0	0	62	2	0	0	0	0	0	0	0	0	0	0	2	0	3
488	1	19420510	2	75.2	174	101.2	105	0.2	0.1		2	-0.75	83	2.5	-1.25	98	10	0	0	0	0	0	0	0	0	0	0	0	0	0	0	14	0	0	2	0	0	0	0	0	0	0	0	0	0	0
489	1	19540909	19	70	167	95.5	96	0	0		0	0	0	0	-0.5	168	53	3	2	0	4	0	0	0	0	0	0	3	0	2	0	53	3	2	2	3	0	2	0	0	0	0	3	0	2	0
490	2	19570807	10	69	165	99	97	0.4	0.04		1	-0.5	94	1.75	-1	91	88	8	8	8	8	8	8	8	8	8	8	8	8	8	8	20	2	0	0	0	0	0	0	0	0	0	0	0	0	0
491	2	19361212	20	69.5	159	105	111	0.06	0.1		0	-0.5	97	0	-0.5	148	47	5	2	1	0	0	0	0	0	0	0	3	0	2	0	47	5	2	2	0	0	0	0	0	0	0	3	0	2	0
492	2	19420803	19	57	147	97	100.5	0.42	0.2		1.25	-2.25	89	2.25	-2	68	37	2	2	1	0	0	0	0	0	0	0	0	0	0	0	37	2	2	0	0	0	0	0	0	0	0	0	0	0	0
493	2	19390319	20	63	155.5	96	99	0.62	0.62	myopic	2.75	-3.25	68	3	-2.5	107	37	2	2	0	0	0	0	0	0	0	0	0	0	0	0	37	2	2	0	0	0	0	0	0	0	0	0	0	0	0
494	2	19620903	20	69	156	103	100	1.7	1.1	cataract				0	-1.5	170	88	8	8	8	8	8	8	8	8	8	8	8	8	8	8	60	8	8	8	8	8	8	8	8	4	8	8	8	8	8
495	2	19510216	16	62	160	97	90	0.12	1.42		1.25	-1	86	1	0	0	37	2	2	0	1	0	0	0	0	0	0	0	0	0	0	31	2	0	0	0	0	0	0	0	0	0	0	0	0	0
496	2	19300330	16	76	153	114	93.5	1.7	1.3	myopic	3.25	-1.75	73	2.5	-1.5	102	37	2	2	0	0	0	0	0	0	0	0	0	0	0	0	31	2	0	0	0	0	0	0	0	0	0	0	0	0	0
497	1	19440301	3	74	170	104	96	0.54	0.6	myopic	3.25	-1	80	3	-0.75	110	20	2	0	0	0	0	0	0	0	0	0	0	0	0	0	10	0	0	0	0	0	0	0	0	0	0	0	0	0	0
498	1	19431007	5	79	163	101	107	0.38	0.56		2.5	-1	94	-1.75	-0.25	23	10	0	0	0	0	0	0	0	0	0	0	0	0	0	0	10	0	0	0	0	0	0	0	0	0	0	0	0	0	0
499	2	19550429	6	74	165	102	94	-0.08	-0.06		0.25	-0.25	116	0	-0.25	110	37	2	2	0	0	0	0	0	0	0	0	0	0	0	0	37	2	0	2	0	0	0	0	0	0	0	0	0	0	0
500	1	19550326	10	70	167	97	89.5	-0.08	0		1.25	-0.25	55	1.75	-0.5	97	37	2	0	2	0	0	0	0	0	0	0	0	0	0	0	53	2	0	0	4	0	0	0	0	0	0	0	0	0	0
501	1	19431101	5	73	177	100	96	0.02	0.02		0.75	-1.25	119	1.75	-0.75	5	20	2	0	0	0	0	0	0	0	0	0	0	0	0	0	10	0	0	0	0	0	0	0	0	0	0	0	0	0	0
502	1	19630210	8	61	178	98	83	0.1	0.1		1	-1.25	83	0	-0.5	81	37	2	2	0	0	0	0	0	0	0	0	0	0	0	0	20	2	0	0	0	0	0	0	0	0	0	0	0	0	0
503	1	19591216	11	69	174	100	97	0.4	0.4		1.5	-1	84	1.25	-0.5	92	47	5	2	2	0	0	0	0	0	0	0	0	0	0	0	37	2	2	2	0	0	0	0	0	0	0	0	0	0	0
504	1	19570812	8	71	180	102	97	0.2	0.26		0.75	-2.25	87	0.75	-3.25	85	37	2	0	2	0	0	0	0	0	0	0	0	0	0	0	37	2	0	2	0	0	0	0	0	0	0	0	0	0	0
505	1	19440502	6	73	164	100	96	0.44	0.62		5.75	-2	90	6.75	-1.25	76	43	4	0	2	0	0	0	0	0	0	0	3	0	2	0	53	6	2	2	0	0	0	0	0	0	0	3	0	2	0
506	1	19531225	7	72	176	97	92	1.2	1.2	myopic	-6.75	-0.75	121	-7.75	-0.75	118	10	0	0	0	0	0	0	0	0	0	0	0	0	0	0	10	0	0	0	0	0	0	0	0	0	0	0	0	0	0
507	2	19460513	12	64	156	100	96	0.22	0.1		1.5	-2.5	87	2.25	-2.5	78	31	2	0	0	0	0	0	0	0	0	0	0	0	0	0	37	2	2	0	0	0	0	0	0	0	0	0	0	0	0
508	1	19531205	7	69	167	102	86	0.12	0.3		-0.5	-0.25	66	-0.5	-0.25	126	10	0	0	0	0	0	0	0	0	0	0	0	0	0	0	20	2	0	0	0	0	0	0	0	0	0	0	0	0	0
509	1	19380627	1	72	173	99	91	0.14	0.1		1.75	-1	85	2.25	-1	85	10	0	0	0	0	0	0	0	0	0	0	0	0	0	0	10	0	0	0	0	0	0	0	0	0	0	0	0	0	0
511	2	19611108	9	60	156	98	93	0.16	0.1		0.75	-1.25	89	0.75	-1	105	13	1	0	0	0	0	0	0	0	0	0	0	0	0	0	10	0	0	0	0	0	0	0	0	0	0	0	0	0	0
512	2	19581229	4	60	156	99	93	0.2	0.06		1	-2.75	90	0.75	-1.75	83	31	2	0	0	0	0	0	0	0	0	0	0	0	0	0	31	2	0	0	0	0	0	0	0	0	0	0	0	0	0
513	2	19450301	7	67	153	105	94	0.4	0.12		2.5	-0.75	21	1.75	-0.5	10	10	0	0	0	0	0	0	0	0	0	0	0	0	0	0	10	0	0	0	0	0	0	0	0	0	0	0	0	0	0
514	2	19501211	9	62	162	100	93	0.16	0.16		0.75	-2.75	83	1	-2	106	43	2	0	0	2	0	0	0	0	0	0	0	0	0	0	31	2	0	0	0	0	0	0	0	0	0	0	0	0	0
516	1	19650416	1	86	175	110	98	1.7	1.1	cataract	-17.25	-2.5	4	-5.25	-0.25	146	88	8	8	8	8	8	8	8	8	8	8	8	8	8	8	20	2	0	0	0	0	0	0	0	0	0	0	0	0	0
517	1	19460125	12	76	174	105	97	0.6	1.7	cataract	0.75	-0.5	157				37	2	2	8	8	8	8	8	8	8	8	8	8	8	8	88	8	8	8	8	8	8	8	8	8	8	8	8	8	8
518	1	19581129	5	68	162	100	91	-0.04	-0.1		0.75	-0.75	46	1	-0.75	118	37	2	0	2	0	0	0	0	0	0	0	0	0	0	0	20	2	0	0	0	0	0	0	0	0	0	0	0	0	0
519	2	19471203	16	68	158	99	99	1.1	0.7	diabetic maculopathy	-1.25	-0.5	80	0.75	-0.75	81	63	2	2	0	0	0	0	0	0	0	0	3	7	3	0	64	4	2	0	0	0	0	0	0	0	0	3	7	2	0
520	1	19451022	13	80	168	106	97	0.1	0.1		0	-1	11	-0.25	-0.75	160	31	2	0	0	0	0	0	0	0	0	0	0	0	0	0	37	2	0	2	0	0	0	0	0	0	0	0	0	0	0
521	1	19500608	0	65	162	100	90	0.1	-0.04		0.75	-1.25	89	1	-1.25	92	64	4	0	2	0	0	0	0	0	0	0	0	7	0	0	64	4	0	2	0	0	0	0	0	0	0	0	7	0	0
522	2	19650331	8	68	161	98	89	0	0.1		-0.25	-0.25	71	-0.5	-0.25	170	20	2	0	0	0	0	0	0	0	0	0	0	0	0	0	20	2	0	0	0	0	0	0	0	0	0	0	0	0	0
523	2	19500830	6	43	144	92	88	0.1	0		1.25	-0.5	109	0.75	-1	68	10	0	0	0	0	0	0	0	0	0	0	0	0	0	0	10	0	0	0	0	0	0	0	0	0	0	0	0	0	0
524	2	19470825	5	51	156	89	80	0.02	-0.08		2	-1.25	101	1.5	-0.75	73	10	0	0	0	0	0	0	0	0	0	0	0	0	0	0	14	0	0	2	0	0	0	0	0	0	0	0	0	0	0
525	2	19550711	2	72	158	106	100	0.02	0.18		-0.25	-0.5	87	0.5	-1.25	100	13	1	0	0	0	0	0	0	0	0	0	0	0	0	0	20	2	0	0	0	0	0	0	0	0	0	0	0	0	0
526	2	19530423	17	63	159.5	102	91	0.62	0.62	myopic	0.5	-1.5	75	-1.75	-2	64	47	2	2	2	0	0	2	0	0	0	0	0	0	0	0	37	2	2	8	8	8	8	8	8	8	8	8	8	8	8
527	2	19561209	8	71	153	109	96	0.3	0.36		0.75	-1.75	84	1.5	-2	97	13	1	0	0	0	0	0	0	0	0	0	0	0	0	0	20	2	0	0	0	0	0	0	0	0	0	0	0	0	0
528	1	19530620	8	75	173	101	93	-0.1	-0.18		0.5	-0.5	46	0.5	-0.5	154	10	0	0	0	0	0	0	0	0	0	0	0	0	0	0	10	0	0	0	0	0	0	0	0	0	0	0	0	0	0
529	1	19401013	28	79	184.5	107	97	0.1	0.52		0	-1.5	83	-3.5	-1.25	106	10	0	0	0	0	0	0	0	0	0	0	0	0	0	0	10	0	0	0	0	0	0	0	0	0	0	0	0	0	0
530	1	19630623	10	69	168	98	97	0.56	0.44		0.25	-1.5	91	0	-1	86	43	4	0	2	0	0	0	0	0	0	0	0	0	0	0	43	4	0	2	1	0	0	0	0	0	0	0	0	0	0
531	2	19570414	5	56	164	92	87	0.12	0.06		-0.25	-0.75	6	0	0	0	20	2	0	0	0	0	0	0	0	0	0	0	0	0	0	10	0	0	0	0	0	0	0	0	0	0	0	0	0	0
532	2	19440210	4	72	155	120	117	1.2	1.22	myopic	-9.5	-3.5	99	-9.25	-2.5	74	15	2	0	0	0	0	0	0	0	0	0	0	0	0	0	10	0	0	0	0	0	0	0	0	0	0	0	0	0	0
533	1	19541009	15	78	172.5	100	98	0.06	0.14		-1.5	-0.75	67	-1.5	-0.75	131	37	2	2	1	0	0	0	0	0	0	0	0	0	0	0	31	2	0	0	0	0	0	0	0	0	0	0	0	0	0
534	2	19461015	10	68	159.5	108	106	0.12	1.7		0	-2	79	0.75	-2	99	15	2	0	0	0	0	0	0	0	0	0	0	0	0	0	10	0	0	0	0	0	0	0	0	0	0	0	0	0	0
535	1	19360905	2	67	165	104	98	0.16	0.04		0	-1	73	0	-0.75	122	37	2	0	2	0	0	0	0	0	0	0	0	0	0	0	20	2	0	0	0	0	0	0	0	0	0	0	0	0	0
536	2	19570716	7	62	157.5	96	90	0.2	0.2		1	-0.5	75	1.75	-0.25	127	53	6	2	2	0	0	0	0	0	0	0	3	0	2	0	53	6	2	2	0	0	0	0	0	0	0	3	0	2	0
537	1	19631231	4	88	173.5	110	101	0.08	0.12		-0.75	-0.5	17	-0.25	-0.75	98	37	2	0	2	0	0	0	0	0	0	0	0	0	0	0	37	2	0	2	0	0	0	0	0	0	0	0	0	0	0
538	2	19540410	12	62	155	101	97	0.02	0.12		-0.75	-1.75	66	0	-1.75	100	37	2	2	2	0	0	0	0	0	0	0	0	0	0	0	37	2	0	2	0	0	0	0	0	0	0	0	0	0	0
539	2	19570620	5	67	162	106	101	-0.1	-0.1		0.5	-1	65	0.5	-0.5	85	20	2	0	0	0	0	0	0	0	0	0	0	0	0	0	20	2	0	0	0	0	0	0	0	0	0	0	0	0	0
540	2	19600511	4	68	157	112	106	0.3	0.2		-0.25	-1	83	0	-0.25	85	10	0	0	0	0	0	0	0	0	0	0	0	0	0	0	20	2	0	0	0	0	0	0	0	0	0	0	0	0	0
541	1	19591216	4	65	162.5	90	88	0.28	0.32		-0.5	-0.75	116	1	-2	78	10	0	0	0	0	0	0	0	0	0	0	0	0	0	0	10	0	0	0	0	0	0	0	0	0	0	0	0	0	0
542	1	19380927	10	83	181	106	99	0.4	0		0.75	-1.5	87	1.75	-1.25	81	15	2	8	8	8	8	8	8	8	8	8	8	8	8	8	10	0	0	0	0	0	0	0	0	0	0	0	0	0	0
543	2	19441027	22	58	151.5	101	95	1.1	0.48		-0.25	-3	87	-0.75	-0.75	116	64	3	2	2	0	0	0	0	0	0	0	3	3	2	0	64	4	2	0	0	0	0	0	0	0	0	0	7	0	0
544	2	19570914	2	70	152	104	101	-0.06	0		0.5	0	0	1	-0.25	90	13	1	0	0	0	0	0	0	0	0	0	0	0	0	0	13	1	0	0	0	0	0	0	0	0	0	0	0	0	0
545	2	19361117	10	63	150	105	98	0.26	0.2		1.25	-2.75	85	0.5	-2	92	31	2	0	0	0	0	0	0	0	0	0	0	0	0	0	15	2	0	0	0	0	0	0	0	0	0	0	0	0	0
546	2	19381119	4	77	162	114	104	0	0.2		0.75	-0.25	64	0.25	-0.25	170	10	0	0	0	0	0	0	0	0	0	0	0	0	0	0	10	0	0	0	0	0	0	0	0	0	0	0	0	0	0
547	2	19490617	18	58	156	97	88	0.04	0.1		2.25	-1.25	69	1.5	-0.5	103	37	2	2	0	0	0	0	0	0	0	0	0	0	0	0	37	2	2	0	0	0	0	0	0	0	0	0	0	0	0
548	1	19340623	0	58	150	100	90	1.7	0.44					-0.5	-2.5	90																10	0	0	0	0	0	0	0	0	0	0	0	0	0	0
549	2	19710918	7	73	174	102	95	-0.08	0.14		-0.75	-1.5	172	-0.25	-2.5	160	37	2	0	2	0	0	0	0	0	0	0	0	0	0	0	37	2	0	2	0	0	0	0	0	0	0	0	0	0	0
550	1	19430203	5	64	167	98	90	0.12	0.16		2.25	-2	72	2.25	-2	90	20	2	0	0	0	0	0	0	0	0	0	0	0	0	0	15	2	0	1	0	0	0	0	0	0	0	0	0	0	0
551	2	19620504	3	52	152	94	82	0.14	0		0	-0.5	24	0.25	-1.25	104	13	1	0	0	0	0	0	0	0	0	0	0	0	0	0	31	2	0	0	0	0	0	0	0	0	0	0	0	0	0
552	2	19550722	5	64	162	99	90	0.1	0.06		0.25	-0.25	112	0	-0.5	74	15	2	0	0	0	0	0	0	0	0	0	0	0	0	0	31	2	0	0	0	0	0	0	0	0	0	0	0	0	0
553	2	19560103	7	71	167	103	92	-0.08	-0.02		0.75	-0.5	69	0.5	-0.25	104	20	2	0	0	0	0	0	0	0	0	0	0	0	0	0	20	2	0	0	0	0	0	0	0	0	0	0	0	0	0
554	2	19520307	14	72	161	111	99	0.04	0.24		0	-1	84	0.25	-1.25	85	20	2	0	0	0	0	0	0	0	0	0	0	0	0	0	20	2	0	0	0	0	0	0	0	0	0	0	0	0	0
555	1	19300102	7	79	165	106	104	0.7	0		-5.75	-1.25	151	-0.25	-0.25	43	88	8	8	8	8	8	8	8	8	8	8	8	8	8	8	31	2	0	0	0	0	0	0	0	0	0	0	0	0	0
556	2	19640920	2	64	161	92	90	0.56	0.44		-3.75	-0.75	9	-4	-0.25	3	10	0	0	0	0	0	0	0	0	0	0	0	0	0	0	31	2	0	0	0	0	0	0	0	0	0	0	0	0	0
557	2	19500707	6	76	162	106	100	0.2	0.2		0	-1	77	0	-1.25	99	13	1	0	0	0	0	0	0	0	0	0	0	0	0	0	10	0	0	0	0	0	0	0	0	0	0	0	0	0	0
558	1	19501211	20	73	168	105	98	0.14	1.32		0	-0.75	90	-3.25	-3.25	77	43	3	0	2	0	0	0	0	0	0	0	0	0	0	0	88	8	8	8	8	8	8	8	8	8	8	8	8	8	8
559	2	19560226	3	70	164.5	98	94	0.36	0.1		-1.25	-3	81	-1.5	-1.75	95	10	0	0	0	0	0	0	0	0	0	0	0	0	0	0	31	2	0	0	0	0	0	0	0	0	0	0	0	0	0
560	2	19401118	8	74	148	115	112	0.2	0.3		1.5	-0.25	99	-0.5	-1	98	10	0	0	0	0	0	0	0	0	0	0	0	0	0	0	10	0	0	0	0	0	0	0	0	0	0	0	0	0	0
561	2	19391024	12	80	147	121	114	0.18	0.1		1	-1.25	75	0.75	-1	113	31	2	0	0	0	0	0	0	0	0	0	0	0	0	0	31	2	0	0	0	0	0	0	0	0	0	0	0	0	0
562	2	19491019	10	64	157	102	95	0	0.06		2	-0.5	67	2	-0.75	110	53	2	2	2	4	0	0	0	0	0	0	0	0	0	0	31	2	0	0	0	0	0	0	0	0	0	0	0	0	0
563	1	19460327	8	72	165	101	100	0.12	0.1		0.25	-0.75	163	0	-0.5	149	31	2	0	0	0	0	0	0	0	0	0	0	0	0	0	37	2	2	2	0	0	0	0	0	0	0	0	0	0	0
564	1	19450902	3	68	155	99	97	0.32	0.14		3	-1.25	87	2.75	-1.5	96	15	2	0	0	0	0	0	0	0	0	0	0	0	0	0	10	0	0	0	0	0	0	0	0	0	0	0	0	0	0
565	2	19431019	14	70	156	110	108	0.1	0.1		2.75	-1	75	3.75	-1.75	102	88	8	8	8	8	8	8	8	8	8	8	8	8	8	8
566	1	19480401	7	71	164	104	95	0.06	0		0.75	-1.25	82	0.75	-1	98	10	0	0	0	0	0	0	0	0	0	0	0	0	0	0	10	0	0	0	0	0	0	0	0	0	0	0	0	0	0
567	2	19480311	8	66.5	153	103	106	0.5	0.3		-0.75	-0.5	53	-0.75	-0.5	55	20	2	0	0	0	0	0	0	0	0	0	0	0	0	0	10	0	0	0	0	0	0	0	0	0	0	0	0	0	0
568	2	19670212	6	72	159	103	95	0	-0.1		1.25	-1	71	1	-1	95	20	2	0	0	0	0	0	0	0	0	0	0	0	0	0	20	2	0	0	0	0	0	0	0	0	0	0	0	0	0
569	1	19560728	8	70	165	102	98	0.5	0.2		1.5	-1	82	1.75	-1.25	112	65	4	2	0	2	0	0	0	0	0	0	3	7	0	0	53	6	2	2	2	0	2	0	0	0	0	3	0	2	0
570	2	19400922	2	44	151.5	86.5	85.5	0.22	0.54		3.25	-2.25	98	2.25	-1.5	89	10	0	0	0	0	0	0	0	0	0	0	0	0	0	0	10	0	0	0	0	0	0	0	0	0	0	0	0	0	0
571	2	19560614	20	66.5	157	96	99	1.1	1.1	myopic	-8.25	-1.75	61	-4.5	-1	118	43	4	0	2	0	0	0	0	0	0	0	0	0	0	0	43	4	0	2	0	0	0	0	0	0	0	0	0	0	0
572	2	19510314	10	61	153	97	98	0.16	0		1.25	-0.5	55	1.25	-1	108	37	2	2	0	0	0	0	0	0	0	0	0	0	0	0	37	2	2	0	0	0	0	0	0	0	0	0	0	0	0
573	2	19360623	4	49.5	141	98	101	1.7	0.22					2.75	-2.75	173																37	2	2	0	0	0	0	0	0	0	0	8	0	0	0
574	2	19490316	8	52.5	157.5	90	91	0.2	0.04		2.75	-3.25	60	1	-0.75	106	31	2	0	0	0	0	0	0	0	0	0	0	0	0	0	37	2	2	0	0	0	0	0	0	0	0	0	0	0	0
575	2	19530607	20	60	154.5	96	98	0.1	0.14		-0.5	-0.25	161	-0.75	-0.25	20	20	2	0	0	0	0	0	0	0	0	0	0	0	0	0	20	2	0	0	0	0	0	0	0	0	0	0	0	0	0
576	2	19591004	10	65.5	148	102	106	0.12	0.1		-0.25	-0.25	133	0	-0.25	96	10	0	0	0	0	0	0	0	0	0	0	0	0	0	0	13	1	0	0	0	0	0	0	0	0	0	0	0	0	0
577	1	19421224	4	79	167	99	102	0.1	0.1		0.25	-1.25	164	0.5	-1	103	10	0	0	0	0	0	0	0	0	0	0	0	0	0	0	14	0	0	2	0	0	0	0	0	0	0	0	0	0	0
578	1	19370302	3	94	174	113	110	0.04	0		2	-1.75	67	1.25	-1.25	89	20	2	0	0	0	0	0	0	0	0	0	0	0	0	0	10	0	0	0	0	0	0	0	0	0	0	0	0	0	0
579	2	19391118	17	66	150	102.5	104	0.4	0.4		2	-2.25	73	2.25	-2	91	37	2	2	8	8	8	8	8	8	8	8	8	8	8	8	31	2	0	0	0	0	0	0	0	0	0	0	0	0	0
580	1	19650123	15	77	172	106.5	105	0.2	0.44		0.75	-1.5	98	-1.25	-1	17	20	2	0	0	0	0	0	0	0	0	0	0	0	0	0	31	2	0	0	0	0	0	0	0	0	0	0	0	0	0
581	2	19440319	14	55	146	95.5	95	1.32	0.2		1.75	-6.75	59	1.25	-0.5	98	88	8	8	8	8	8	8	8	8	8	8	8	8	8	8	37	2	2	0	0	0	0	0	0	0	0	3	0	2	0
583	2	19761021	6	72	156	96	102	1.2	1.2	myopic	-7.75	-0.5	178	-6.75	-0.25	147	37	2	0	2	1	0	0	0	0	0	0	0	0	0	0	37	2	0	2	1	0	0	0	0	0	0	0	0	0	0
584	1	19621219	3	44	158	80	80	0.2	0.3		0.75	-0.75	87	0.75	-0.75	103	10	0	0	0	0	0	0	0	0	0	0	0	0	0	0	10	0	0	0	0	0	0	0	0	0	0	0	0	0	0
585	2	19530508	1	57	155	95	90	0.24	0.24		2.25	-0.5	91	2.5	-0.75	80	20	2	0	0	0	0	0	0	0	0	0	0	0	0	0	10	0	0	0	0	0	0	0	0	0	0	0	0	0	0
586	1	19400202	3	60	157	96	91	0.16	0.14		0.5	-1.25	83	0	-0.75	89	20	2	0	0	0	0	0	0	0	0	0	0	0	0	0	15	2	0	0	0	0	0	0	0	0	0	0	0	0	0
587	2	19430707	8	74	152	116	109	0.36	0.18		1.5	-2.75	71	0.25	-1	99	20	2	0	0	0	0	0	0	0	0	0	0	0	0	0	37	2	0	2	0	0	0	0	0	0	0	0	0	0	0
588	2	19491003	9	75	154	106	100	0.42	0.54		-0.75	-2.75	60	-2	-0.75	84	37	2	0	2	0	0	0	0	0	0	0	0	0	0	0	10	0	0	0	0	0	0	0	0	0	0	0	0	0	0
589	1	19460927	1	74	168	102	100	0.02	0.14		2.5	-1.25	86	2.25	-2.25	86	10	0	0	0	0	0	0	0	0	0	0	0	0	0	0	10	0	0	0	0	0	0	0	0	0	0	0	0	0	0
590	1	19460228	0	73	160	99	99	0.22	0.32		-0.25	-1	69	-1.5	-1.75	18	10	0	0	0	0	0	0	0	0	0	0	0	0	0	0	10	0	0	0	0	0	0	0	0	0	0	0	0	0	0
591	1	19591005	6	74	165	98	95	0.1	0.06		0.5	-1	86	0.25	-1	91	31	2	0	0	0	0	0	0	0	0	0	0	0	0	0	20	2	0	0	0	0	0	0	0	0	0	0	0	0	0
592	1	19380714	6	69	158	100	98	0.16	0		2.5	-1.75	90	1.25	-0.75	89	10	0	0	0	0	0	0	0	0	0	0	0	0	0	0	20	2	0	0	0	0	0	0	0	0	0	0	0	0	0
593	2	19440103	12	78	151	112	108	0.12	0.22		1.25	-1.75	78	0.25	-0.75	169	37	2	0	2	0	0	0	0	0	0	0	0	0	0	0	20	2	0	0	0	0	0	0	0	0	0	0	0	0	0
594	1	19520221	5	80	168	104	106	-0.1	-0.1		0.5	-0.25	70	0.5	-0.25	117	10	0	0	0	0	0	0	0	0	0	0	0	0	0	0	20	2	0	0	0	0	0	0	0	0	0	0	0	0	0
595	2	19420114	5	57	152.5	105	100	0.04	0.06		-0.25	0	0	1.5	-1.5	82	37	2	2	0	0	0	0	0	0	0	0	0	0	0	0	37	2	2	0	0	0	0	0	0	0	0	0	0	0	0
596	2	19441009	14	62	152.5	102	96	0.28	0.1		1.5	-1.5	40	0.75	-0.25	77	37	2	2	0	0	0	0	0	0	0	0	0	0	0	0	37	2	2	0	0	0	0	0	0	0	0	0	0	0	0
597	1	19511128	20	85	172	102	104	0.1	0		1.25	-0.25	50	1.25	-0.75	100	10	0	0	0	0	0	0	0	0	0	0	0	0	0	0	10	0	0	0	0	0	0	0	0	0	0	0	0	0	0
598	1	19450423	0	64	164	97	92	0	-0.06		1.25	-1	102	1	-0.25	106	31	2	0	0	0	0	0	0	0	0	0	0	0	0	0	20	2	0	0	0	0	0	0	0	0	0	0	0	0	0
599	2	19631004	9	73	155	98	104	0.16	0.06		0.25	-2	158	-0.25	-0.25	25	37	2	0	2	0	0	0	0	0	0	0	0	0	0	0	20	2	0	0	0	0	0	0	0	0	0	0	0	0	0
600	2	19500718	13	52	149	98	92	0.2	0.2		0.5	-1	78	0.75	-1.25	93	31	2	0	0	0	0	0	0	0	0	0	0	0	0	0	37	2	2	0	0	0	0	0	0	0	0	0	0	0	0
601	2	19341113	16	64	153	108	102	0.48	0.56		0	1.75	8	0.25	1	10	31	2	0	0	0	0	0	0	0	0	0	0	0	0	0	43	2	0	0	2	0	0	0	0	0	0	0	0	0	0
602	2	19511219	3	69	151	102	94	0	0.02		1.25	-1	82	0	0	0	10	0	0	0	0	0	0	0	0	0	0	0	0	0	0	10	0	0	0	0	0	0	0	0	0	0	0	0	0	0
603	1	19461001	1	68	166	100	94	0.2	0.7		2	-0.25	14	3	-0.25	52	10	0	0	0	0	0	0	0	0	0	0	0	0	0	0	10	0	0	0	0	0	0	0	0	0	0	0	0	0	0
604	2	19530105	10	73	164	104	100	0.12	0.14		0.5	-0.5	22	1.25	-0.25	121	20	2	0	0	0	0	0	0	0	0	0	0	0	0	0	20	2	0	0	0	0	0	0	0	0	0	0	0	0	0
605	2	19630907	1	67	154	102	90	1.2	1.1	myopic	-4.5	-1.5	84	-4	-4.25	94	31	2	0	0	0	0	0	0	0	0	0	0	0	0	0	37	2	0	2	0	0	0	0	0	0	0	0	0	0	0
606	1	19490624	5	85	183	105	101	1.7	0.3					0.5	-0.5	27																20	2	0	0	0	0	0	0	0	0	0	0	0	0	0
607	1	19451016	12	58	159.5	92	90	0	0		0.75	-1	84	1.25	-1	83	13	1	0	0	0	0	0	0	0	0	0	0	0	0	0	31	2	0	0	0	0	0	0	0	0	0	0	0	0	0
608	1	19371014	5	73	170	100	92	0	0		0.75	-0.25	55	0.75	-0.25	89	31	2	0	0	0	0	0	0	0	0	0	0	0	0	0	10	0	0	0	0	0	0	0	0	0	0	0	0	0	0
609	1	19450725	5	73	170	100	98	0.08	0.34		1.25	-1.25	94	1.25	-0.75	125	10	0	0	0	0	0	0	0	0	0	0	0	0	0	0	20	2	0	0	0	0	0	0	0	0	0	0	0	0	0
610	2	19510511	4	58	154.5	100	93	0.42	0.44		0.75	-2.5	94	0.75	-3.25	93	10	0	0	0	0	0	0	0	0	0	0	0	0	0	0	10	0	0	0	0	0	0	0	0	0	0	0	0	0	0
611	2	19480102	10	70	153.5	108	100	0.26	0.52		0	-3	94	-2.75	-3.25	87	31	2	0	0	0	0	0	0	0	0	0	0	0	0	0	10	0	0	0	0	0	0	0	0	0	0	0	0	0	0
612	2	19570724	6	72	158.5	105	100	0.4	0.52		0.25	-4.25	87	0.5	-4.75	87	13	1	0	0	0	0	0	0	0	0	0	0	0	0	0	10	0	0	0	0	0	0	0	0	0	0	0	0	0	0
613	2	19490809	14	88	161	121	116	0.34	0.44		0.5	-2.75	86	0.75	-2.5	101	37	2	2	1	0	0	0	0	0	0	0	0	0	0	0	31	2	0	0	0	0	0	0	0	0	0	0	0	0	0
615	2	19480118	13	78	163	112	109	0.1	0.16		0.75	-1.25	71	0.75	-1.25	92	31	2	0	0	0	0	0	0	0	0	0	0	0	0	0	31	2	0	1	0	0	0	0	0	0	0	0	0	0	0
616	1	19510626	4	80	166	106	98	0.1	0		1	-1	79	0.75	0	0	20	2	0	0	0	0	0	0	0	0	0	0	0	0	0	20	2	0	0	0	0	0	0	0	0	0	0	0	0	0
617	2	19540329	10	68	157	102	95	1.1	1.1	myopic	-7	-2.25	74	-5.75	-0.5	110	10	0	0	0	0	0	0	0	0	0	0	0	0	0	0	10	0	0	0	0	0	0	0	0	0	0	0	0	0	0
618	2	19401227	5	58.5	155.5	93	86	0.1	0.2		1.75	-0.5	82	2.25	-1.25	141	88	8	8	8	8	8	8	8	8	8	8	8	8	8	8	15	2	0	0	0	0	0	0	0	0	0	0	0	0	0
619	2	19560522	5	68	154.5	107	100	0.12	0.04		1.75	-1.5	74	1.5	-1	116	10	0	0	0	0	0	0	0	0	0	0	0	0	0	0	10	0	0	0	0	0	0	0	0	0	0	0	0	0	0
620	1	19471029	12	65	162	101	97	0.1	0.4		-0.5	-1.75	168	-1.25	-1.75	2	20	2	0	0	0	0	0	0	0	0	0	0	0	0	0	10	0	0	0	0	0	0	0	0	0	0	0	0	0	0
621	1	19590508	13	101	178	116	112	0.36	1.1		0	-0.25	114	0.5	-1	80	64	3	2	0	0	0	0	0	0	0	0	3	3	2	0	75	2	2	0	0	2	0	3	3	4	3	3	7	2	0
622	1	19520213	15	75	169	102	100	0.06	0.1		2	-1	81	2	-0.75	72	37	2	2	0	0	0	0	0	0	0	0	0	0	0	0	20	2	0	0	0	0	0	0	0	0	0	0	0	0	0
623	1	19411206	15	71	168.5	95	90	0.22	0.2		0.75	-1	79	0.75	-1.75	109	37	2	0	2	0	0	0	0	0	0	0	0	0	0	0	37	2	2	1	0	0	0	0	0	0	0	0	0	0	0
624	2	19561107	7	62	157	97	95	0.1	0.1		-0.25	-0.5	165	0.75	-0.75	96	37	2	2	2	0	0	0	0	0	0	0	0	0	0	0	43	3	2	2	0	0	0	0	0	0	0	0	0	0	0
625	2	19451118	2	63	159.5	97	92	0	0		0.5	-0.25	106	0.75	-0.25	108	14	0	2	0	0	0	0	0	0	0	0	0	0	0	0	14	0	0	2	0	0	0	0	0	0	0	0	0	0	0
626	2	19430408	5	55	145	100	89	0.48	0.48		-6	-0.25	100	-4.5	-1	24	10	0	0	0	0	0	0	0	0	0	0	0	0	0	0	10	0	0	0	0	0	0	0	0	0	0	0	0	0	0
627	1	19390705	6	61	155	100	95	0.2	0.24		1.25	-2	86	0	-1.5	86	12	2	2	0	0	0	0	0	0	0	0	0	0	0	0	20	2	0	0	0	0	0	0	0	0	0	0	0	0	0
628	2	19500619	1	53	153	96	93	0.2	0.22		2.25	-0.75	82	2	-1	96	10	0	0	0	0	0	0	0	0	0	0	0	0	0	0	10	0	0	0	0	0	0	0	0	0	0	0	0	0	0
629	2	19351110	7	61	158	104	98	0.42	0.24		1.75	-1.5	82	0.5	-1.5	78	10	0	0	0	0	0	0	0	0	0	0	0	0	0	0	10	0	0	0	0	0	0	0	0	0	0	0	0	0	0
630	1	19450302	2	85	176.5	108	102	0.5	0		1.75	-3.25	179	1	-0.25	138	20	2	0	0	0	0	0	0	0	0	0	0	0	0	0	20	2	0	0	0	0	0	0	0	0	0	0	0	0	0
631	2	19471227	18	80	164	110	108	0.2	1.7		0.5	-2	83				53	6	2	2	0	0	0	0	0	0	0	0	0	0	0
632	2	19470308	14	73.5	162	108	102	0.64	0.3		0.25	-0.5	86	0.75	-0.5	111	37	2	0	2	0	0	0	0	0	0	0	0	0	0	0	37	2	0	2	0	0	0	0	0	0	0	0	0	0	0
633	1	19560219	3	75	169	98	94	0.16	0.14		-0.75	-1	87	-0.5	-0.75	89	37	2	0	2	0	0	0	0	0	0	0	0	0	0	0	37	2	0	2	0	0	0	0	0	0	0	0	0	0	0
634	1	19621121	3	75	172.5	100	95	1.7	0.3					0.75	-0.5	40	10	0	0	0	0	0	0	0	0	0	0	0	0	0	0	20	2	0	0	0	0	0	0	0	0	0	0	0	0	0
635	2	19490513	15	56	154	98	90	1.1	1.1	myopic	2.25	-2.5	102	3	-0.75	149	62	2	0	0	0	0	0	0	0	0	0	3	3	2	0	61	8	8	8	8	8	8	8	8	8	8	8	3	8	3
636	2	19440419	10	58	146	94	90	0.44	0.58		2	-0.5	81	2.75	-1	125	43	3	0	0	0	0	0	0	0	0	0	0	0	0	0	47	5	0	0	0	0	0	0	0	0	0	0	0	0	0
637	1	19441012	12	70	164.5	98	88	0.18	0		0	-1.5	82	0.5	-1.25	89	10	0	0	0	0	0	0	0	0	0	0	0	0	0	0	10	0	0	0	0	0	0	0	0	0	0	0	0	0	0
638	2	19490929	16	70	156	110	106	-0.06	0.02		2.5	-2	97	2.25	-1.75	83	20	2	0	0	0	0	0	0	0	0	0	0	0	0	0	37	2	2	0	0	0	0	0	0	0	0	0	0	0	0
639	2	19431027	8	60	156	100	98	0.12	0.3		2	-0.5	63	3.25	-1.25	100	43	3	2	0	0	0	0	0	0	0	0	0	0	0	0	43	3	2	2	0	0	0	0	0	0	0	1	0	0	0
640	2	19580505	3	66	168.5	93	83	0.1	0.12		1.5	-0.25	61	1.25	-0.25	76	10	0	0	0	0	0	0	0	0	0	0	0	0	0	0	10	0	0	0	0	0	0	0	0	0	0	0	0	0	0
641	2	19460517	0	56	158.5	94	92	0.5	0.34		2.75	-0.5	87	2.5	-0.5	87	20	2	0	0	0	0	0	0	0	0	0	0	0	0	0	10	0	0	0	0	0	0	0	0	0	0	0	0	0	0
642	2	19470314	8	70	162	108	106	0.04	0.1		1	-0.5	64	1.75	-1.5	111	13	1	0	0	0	0	0	0	0	0	0	0	0	0	0	10	0	0	0	0	0	0	0	0	0	0	0	0	0	0
643	1	19410803	20	90	178	106	104	0	0.04		2	-0.75	90	2	-0.75	75	31	2	0	1	0	0	0	0	0	0	0	0	0	0	0	20	2	0	0	0	0	0	0	0	0	0	0	0	0	0
644	2	19390819	0	67	158	105	98	0.28	0.22		1.25	-0.25	48	0.5	-0.5	155	10	0	0	0	0	0	0	0	0	0	0	0	0	0	0	15	2	0	0	0	0	0	0	0	0	0	0	0	0	0
645	1	19471009	16	67	161	98	102	0.24	0.2		2.25	-1.25	93	2.25	-1.25	91	31	2	0	0	0	0	0	0	0	0	0	0	0	0	0	37	2	0	2	0	0	0	0	0	0	0	0	0	0	0
646	2	19520516	12	57	154	98	94	0.4	0.66		1	-0.75	94	-2.5	-3.75	94	37	2	2	0	0	0	0	0	0	0	0	0	0	0	0	37	2	2	0	0	0	0	0	0	0	0	0	0	0	0
647	1	19490922	3	80	172	102	102	0	0.08		0.25	-0.5	112	-0.25	-0.5	40	10	0	0	0	0	0	0	0	0	0	0	0	0	0	0	20	2	0	0	0	0	0	0	0	0	0	0	0	0	0
648	1	19461108	3	74	165	100	98	1.1	0.02		2	-0.75	75	1.75	-1	93	20	2	0	0	0	0	0	0	0	0	0	0	0	0	0	20	2	0	0	0	0	0	0	0	0	0	0	0	0	0
649	2	19610209	1	71	163	102	94	-0.1	-0.1		0.25	-1.25	75	0.75	-1.5	98	13	1	0	0	0	0	0	0	0	0	0	0	0	0	0	10	0	0	0	0	0	0	0	0	0	0	0	0	0	0
650	1	19351102	2	71	164	105	100	0.34	0.46		1.5	-2.25	107	-3.75	-2.5	93	10	0	0	0	0	0	0	0	0	0	0	0	0	0	0	88	8	8	8	8	8	8	8	8	8	8	8	8	8	8
651	2	19391220	5	63	154	102	94	1.1	1.1	myopic	-7.75	-0.75	92	-4.5	-1	91	10	0	0	0	0	0	0	0	0	0	0	0	0	0	0	10	0	0	0	0	0	0	0	0	0	0	0	0	0	0
652	2	19470619	6	71	156	102	98	0.1	0.1		1.25	-2	95	1.5	-2.25	89	10	0	0	0	0	0	0	0	0	0	0	0	0	0	0	10	0	0	0	0	0	0	0	0	0	0	0	0	0	0
653	1	19640716	8	62	165	90	86	0.3	0.18		-0.5	-0.5	49	0	-0.75	100	20	2	0	0	0	0	0	0	0	0	0	0	0	0	0	10	0	0	0	0	0	0	0	0	0	0	0	0	0	0
654	1	19730626	5	79	170	100	94	-0.1	0.12		-0.25	-0.5	2	-0.5	-1.5	168	20	2	0	0	0	0	0	0	0	0	0	0	0	0	0	10	0	0	0	0	0	0	0	0	0	0	0	0	0	0
655	1	19310107	7	60	159	100	95	0.52	0.3		0	-1.5	76	1.25	-1.75	85	10	0	0	0	0	0	0	0	0	0	0	0	0	0	0	10	0	0	0	0	0	0	0	0	0	0	0	0	0	0
656	1	19391016	4	77	170	103	95	0.02	-0.06		0.5	0	0	0.75	-0.75	83	10	0	0	0	0	0	0	0	0	0	0	0	0	0	0	10	0	0	0	0	0	0	0	0	0	0	0	0	0	0
657	1	19460114	2	97	171	112	114	0.28	0.08		1	-1.5	78	1	-0.5	109	10	0	0	0	0	0	0	0	0	0	0	0	0	0	0	10	0	0	0	0	0	0	0	0	0	0	0	0	0	0
658	2	19411005	9	49	150	88	87	0	0.2		0.75	-0.75	102	1	-1.75	83	15	2	0	0	0	0	0	0	0	0	0	0	0	0	0	10	0	0	0	0	0	0	0	0	0	0	0	0	0	0
659	2	19580714	4	70	160	107	106	0.38	0.4		-1.25	-0.25	27	-1.5	-0.75	5	20	2	0	0	0	0	0	0	0	0	0	0	0	0	0	10	0	0	0	0	0	0	0	0	0	0	0	0	0	0
660	2	19620926	7	71	153.5	98	105	0.18	0.22		-0.5	-0.75	10	0.25	-1.25	91	37	2	2	2	0	0	0	0	0	0	0	0	0	0	0	43	3	2	2	0	0	0	0	0	0	0	0	0	0	0
661	1	19430224	6	70	175	106	105	0.2	0.26		-0.75	-0.75	135	0.75	-1.75	173	10	0	0	0	0	0	0	0	0	0	0	0	0	0	0	13	1	0	0	0	0	0	0	0	0	0	0	0	0	0
662	1	19570110	4	81.5	170	102	105	-0.02	-0.04		0	-0.25	58	0	-0.25	148	10	0	0	0	0	0	0	0	0	0	0	0	0	0	0	10	0	0	0	0	0	0	0	0	0	0	0	0	0	0
663	2	19490823	14	60	161	96	98	0.28	0.24		2.25	-1.25	79	2.5	-1.25	98	37	2	2	2	0	0	0	0	0	0	0	0	0	0	0	37	2	2	0	0	0	0	0	0	0	0	0	0	0	0
664	2	19500404	10	82	161	104.5	105	0.22	0.2		0.5	-1.25	87	0.25	-1.25	94	20	2	0	0	0	0	0	0	0	0	0	0	0	0	0	20	2	1	0	0	0	0	0	0	0	0	0	0	0	0
665	2	19430307	16	64	161.5	101	106	0.44	0.4		-1	-1.75	117	0.75	-3.75	57	31	2	0	0	0	0	0	0	0	0	0	0	0	0	0	20	2	0	0	0	0	0	0	0	0	0	0	0	0	0
666	1	19450720	17	73	163	102	106	0.06	0		2.5	-1	90	2.25	-1	86	10	0	0	0	0	0	0	0	0	0	0	0	0	0	0	10	0	0	0	0	0	0	0	0	0	0	0	0	0	0
667	2	19520111	2	60	147	100	103	0.12	0		1.25	-0.5	96	0.75	-1.25	3	31	2	0	0	0	0	0	0	0	0	0	0	0	0	0	10	0	0	0	0	0	0	0	0	0	0	0	0	0	0
668	1	19460907	1	75	157	108	106	0.14	0.62		0.75	-1.25	98	1.25	-2	84	15	2	0	0	0	0	0	0	0	0	0	0	0	0	0	10	0	0	0	0	0	0	0	0	0	0	0	0	0	0
669	2	19530401	6	77.5	163	109	104	0.52	0.22		-1.25	-1	89	-0.75	-0.5	73	15	2	0	0	0	0	0	0	0	0	0	0	0	0	0	10	0	0	0	0	0	0	0	0	0	0	0	0	0	0
670	2	19360123	5	68.5	150	107	102.5	0.24	0.2		3	-1.25	111	3	0	0	10	0	0	0	0	0	0	0	0	0	0	0	0	0	0	10	0	0	0	0	0	0	0	0	0	0	0	0	0	0
671	2	19400803	12	67	153	103	115	0.24	0.6		2.75	-1.5	97	2.25	-0.5	17	37	2	2	0	0	0	0	0	0	0	0	0	0	0	0	37	2	2	0	0	0	0	0	0	0	0	3	0	2	0
672	1	19561214	15	80	167	104	107	0.58	0.2		-0.5	-1	111	0	-1	82	47	5	2	0	0	0	0	0	0	0	0	7	0	0	0	53	2	2	0	2	0	3	0	0	0	0	2	0	0	0
673	2	19410510	8	52.5	148.5	93	95	0.34	0.22		3	-1.5	85	2.75	-1.5	113	10	0	0	0	0	0	0	0	0	0	0	0	0	0	0	31	2	0	0	0	0	0	0	0	0	0	0	0	0	0
674	1	19390528	2	70	161	97	100	0.14	0.32		0.75	-1.25	83	0	-1.5	84	20	2	0	0	0	0	0	0	0	0	0	0	0	0	0	10	0	0	0	0	0	0	0	0	0	0	0	0	0	0
675	2	19500430	14	65	153	100	102	0.24	0.34		3.75	-2.5	80	3.25	-1.5	101	31	2	1	0	0	0	0	0	0	0	0	0	0	0	0	43	3	0	1	1	0	0	0	0	0	0	0	0	0	0
676	2	19640305	4	65	155	94	97	0.18	0.22		-1.25	0	0	-1	-0.5	150	10	0	0	0	0	0	0	0	0	0	0	0	0	0	0	10	0	0	0	0	0	0	0	0	0	0	0	0	0	0
677	1	19460701	1	62.5	160	97	98	0.2	0.06		2.5	-1.25	85	2	-1.5	85	20	2	0	0	0	0	0	0	0	0	0	0	0	0	0	37	2	2	1	0	0	0	0	0	0	0	0	0	0	0
678	2	19540919	23	67.5	162	99	95	0.4	1.1		0.25	-1.25	94	0.25	-1	81	63	2	2	0	0	0	0	0	0	0	0	3	3	2	0	64	4	2	0	0	0	0	0	0	0	0	3	3	3	3
679	2	19460225	5	56	146	95	97	0	0.2		0.75	-1	93	0.75	-1.25	86	10	0	0	0	0	0	0	0	0	0	0	0	0	0	0	10	0	0	0	0	0	0	0	0	0	0	0	0	0	0
680	1	19690609	6	89.5	176	107	104	0.24	0.14		-0.5	-1.5	75	-0.5	-1	88	31	2	0	0	0	0	0	0	0	0	0	0	0	0	0	37	2	2	0	0	0	0	0	0	0	0	0	0	0	0
681	2	19510204	4	84	162	112	117	0.26	0.26		2	-2	105	3.25	-0.5	8	13	1	0	0	0	0	0	0	0	0	0	0	0	0	0	10	0	0	0	0	0	0	0	0	0	0	0	0	0	0
682	2	19430208	15	72	164.5	97	103	1.7	0.16		0.25	0	0	0.75	0	0																37	2	2	2	0	0	0	0	0	0	0	0	0	0	0
683	2	19421011	3	64	153	101	100	1.7	0.46		1.25	-1.25	60	1.75	-1.75	116	12	2	2	0	0	0	0	0	0	0	0	7	0	0	0	10	0	0	0	0	0	0	0	0	0	0	7	0	0	0
684	2	19460506	18	49	163	89	91	1.2	1.2	cataract	-7.25	-4.5	92	-4.75	-3.25	92	88	8	8	8	8	8	8	8	8	8	8	8	8	8	8	88	8	8	8	8	8	8	8	8	8	8	8	8	8	8
685	2	19530803	20	50	144.5	92	90	0.3	0.16		0.5	-0.5	153	1	-0.5	83	53	5	2	0	4	2	0	0	1	0	0	3	0	2	0	53	4	2	0	4	0	0	0	0	0	0	3	0	2	0
686	2	19480211	10	60	146	102	100	0.44	0.42		5	-1.5	70	5	-1.5	101	10	0	0	0	0	0	0	0	0	0	0	0	0	0	0	10	0	0	0	0	0	0	0	0	0	0	0	0	0	0
687	1	19530219	5	79	176	101	100	0	0.12		1.25	-1.5	87	1.5	-2	91	43	2	2	0	2	0	0	0	0	0	0	0	0	0	0	37	2	0	2	0	0	0	0	0	0	0	0	0	0	0
688	1	19401103	7	89	170.5	112	116	0.1	0.34		1.5	-1.5	82	0.75	-2.25	97	20	2	0	0	0	0	0	0	0	0	0	0	0	0	0	10	0	0	0	0	0	0	0	0	0	0	0	0	0	0
689	2	19490805	20	50	150	89.5	83	0.4	0.68		2	-0.25	109	5.25	-1.75	85	20	2	0	0	0	0	0	0	0	0	0	0	0	0	0	31	2	0	0	0	0	0	0	0	0	0	0	0	0	0
690	2	19380629	15	65	155	102	107	0.42	0.38		3.5	-1.5	82	4	-1.5	111	31	2	0	0	0	0	0	0	0	0	0	0	0	0	0	31	2	0	0	0	0	0	0	0	0	0	0	0	0	0
691	2	19420615	10	53	157	87	100	0.34	0.3		4.5	-1.5	89	4	-1.25	100	37	2	2	0	0	0	0	0	0	0	0	0	0	0	0	43	2	0	0	2	0	0	0	0	0	0	0	0	0	0
692	1	19420426	5	66	177	101	104	0.24	0.54		0.5	-1	97	-0.75	-2	88	31	2	0	0	0	0	0	0	0	0	0	0	0	0	0	31	2	0	0	0	0	0	0	0	0	0	0	0	0	0
693	2	19321107	5	50	146.5	93	101	0.3	0.3		2	-2	73	1.5	-1.25	102	31	2	0	0	0	0	0	0	0	0	0	0	0	0	0	31	2	0	0	0	0	0	0	0	0	0	0	0	0	0
694	1	19450201	12	63	168	95	91	0.26	0.12		1.75	-0.75	27	1.25	-0.5	159	20	2	0	0	0	0	0	0	0	0	0	0	0	0	0	10	0	0	0	0	0	0	0	0	0	0	0	0	0	0
695	2	19540518	5	61	153	96	96	0.2	0		1.25	-0.25	79	1	0	0	10	0	0	0	0	0	0	0	0	0	0	0	0	0	0	10	0	0	0	0	0	0	0	0	0	0	0	0	0	0
698	2	19430627	12	67	146.5	108	110	0.06	1.7		0.75	-0.75	95	-24.75	-2	64	20	2	0	0	0	0	0	0	0	0	0	0	0	0	0	10	0	0	0	0	0	0	0	0	0	0	0	0	0	0
699	2	19460123	12	68.5	162.5	103	104.5	0.36	1.2		2.5	-0.75	72	1.5	-1.75	84	47	5	2	0	0	0	0	0	0	0	0	3	0	2	0	47	3	2	0	2	0	0	0	0	0	0	3	0	2	0
700	2	19450704	2	61.5	163	99	104	0.28	0.36		2.5	-0.5	93	2.5	-0.5	73	31	2	0	0	0	0	0	0	0	0	0	0	0	0	0	10	0	0	0	0	0	0	0	0	0	0	0	0	0	0
701	1	19551213	15	68	160	95	91	0.2	0.08		1.75	-0.25	106	2	-0.5	100	43	4	2	2	0	0	0	0	0	0	0	0	0	0	0	43	4	2	2	0	0	0	0	0	0	0	0	0	0	0
702	2	19350429	1	67	157	103	105	0.54	0.4		3	-2.25	85	2	-2	100	10	0	0	0	0	0	0	0	0	0	0	0	0	0	0	10	0	0	0	0	0	0	0	0	0	0	0	0	0	0
703	2	19530819	3	63	158	97	93	0.32	1.1		0.5	-2	95	-7.75	-2.25	86	10	0	0	0	0	0	0	0	0	0	0	0	0	0	0	10	0	0	0	0	0	0	0	0	0	0	0	0	0	0
704	2	19501203	5	68	147	107	105	0.14	0.14		1	-1	85	0.75	-1	78	37	2	2	0	0	0	0	0	0	0	0	0	0	0	0	31	2	0	0	0	0	0	0	0	0	0	0	0	0	0
705	2	19620818	10	61	158	102	97	0.64	0.32		-0.25	-1.25	120	0	-1	81	37	2	2	2	0	0	0	0	0	0	0	0	0	0	0	37	2	2	2	0	0	0	0	0	0	0	0	0	0	0
706	1	19620422	2	74	165	101	97	-0.06	-0.1		-0.25	-0.25	138	-0.5	-0.75	15	53	6	2	2	0	0	0	0	0	0	0	1	0	0	0	47	5	2	2	0	0	0	0	0	0	0	2	0	0	0
707	2	19460918	22	53	144	96	93	0.42	1.7		2	-1	112				37	2	2	0	0	0	0	0	0	0	0	0	0	0	0
708	2	19510912	4	70	159	104.5	104	0.16	0.2		0.75	-1.5	80	1.25	-1.75	95	20	2	0	0	0	0	0	0	0	0	0	0	0	0	0	20	2	0	0	0	0	0	0	0	0	0	0	0	0	0
709	2	19331226	30	59	150	98	97	1.7	1.1	myopic				-2.5	-3.75	61																88	8	8	8	8	8	8	8	8	8	8	8	8	8	8
710	2	19530830	13	97	158	125	125	0.3	0.3		1.5	-0.25	102	1.25	0	0	20	2	0	0	0	0	0	0	0	0	0	0	0	0	0	20	2	0	0	0	0	0	0	0	0	0	0	0	0	0
711	1	19430518	15	99	180	110	111	0.16	0.22		0.75	-1	74	1	-0.75	103	53	4	2	0	4	0	0	0	0	0	0	3	0	2	0	53	6	2	2	4	0	2	0	0	0	0	2	0	0	0
712	2	19441203	13	71	165	100	106	0.5	0.48		-3.25	-1.5	72	-3.25	-1.25	88	31	2	0	0	0	0	0	0	0	0	0	0	0	0	0	31	2	0	0	0	0	0	0	0	0	0	0	0	0	0
713	2	19551111	13	55	153.5	91.5	95	0.58	0.58	myopic	-2.5	-0.25	40	-3.5	-0.25	16	43	2	0	2	2	0	0	0	0	0	0	0	0	0	0	43	2	0	0	2	0	0	0	0	0	0	0	0	0	0
714	1	19550905	5	75	168.5	104.5	102.5	0.2	0.18		0	-2.25	87	0.25	-1.25	90	20	2	0	0	0	0	0	0	0	0	0	0	0	0	0	20	2	0	0	0	0	0	0	0	0	0	0	0	0	0
715	1	19691214	6	68	164	97.5	98	0.02	0.16		-0.25	-0.5	52	-0.25	-0.75	151	43	3	2	2	0	0	0	0	0	0	0	0	0	0	0	37	2	2	2	0	0	0	0	0	0	0	0	0	0	0
716	2	19530827	5	54	155	96.5	99	-0.1	-0.1		0	-0.25	52	0	0	0	10	0	0	0	0	0	0	0	0	0	0	0	0	0	0	10	0	0	0	0	0	0	0	0	0	0	0	0	0	0
717	2	19570321	5	80	164	106	110	0.1	0.1		-0.5	-0.5	57	0.25	-0.5	81	20	2	0	0	0	0	0	0	0	0	0	0	0	0	0	10	0	0	0	0	0	0	0	0	0	0	0	0	0	0
718	1	19450128	13	69	161	98.5	100	0.2	0.1		3	-2	100	2.75	-1.75	85	37	2	2	0	0	0	0	0	0	0	0	0	0	0	0	37	2	2	0	0	0	0	0	0	0	0	0	0	0	0
719	1	19561001	14	70	169	97	99	-0.1	-0.06		0.5	-0.25	89	0.25	-0.75	94	53	6	2	2	0	0	0	0	0	0	0	0	0	0	0	53	3	2	2	0	0	0	0	0	0	0	2	0	0	0
720	2	19640921	6	49	155	88	91	0.48	0.58		-0.75	-2	95	-1.5	-1.5	85	65	3	0	2	0	0	0	2	0	0	0	0	0	0	0	71	2	2	2	0	0	0	3	0	0	0	1	0	0	0
721	2	19370406	5	57	151	103.5	100	0	0.14		-0.25	-0.75	106	0.25	-1	57	10	0	0	0	0	0	0	0	0	0	0	0	0	0	0	10	0	0	0	0	0	0	0	0	0	0	0	0	0	0
722	1	19490902	2	66	163	97	96	-0.04	-0.06		0.5	-0.5	78	0.25	-0.25	69	20	2	0	0	0	0	0	0	0	0	0	0	0	0	0	10	0	0	0	0	0	0	0	0	0	0	0	0	0	0
723	2	19741025	3	62	152.5	100	95	-0.1	-0.14		-0.25	-0.25	87	0	-0.25	89	20	2	0	0	0	0	0	0	0	0	0	0	0	0	0	10	0	0	0	0	0	0	0	0	0	0	0	0	0	0
724	1	19531023	5	71.5	164	96	98	0.2	-0.02		1.75	-1	104	1	-0.25	78	10	0	0	0	0	0	0	0	0	0	0	0	0	0	0	20	2	0	0	0	0	0	0	0	0	0	0	0	0	0
725	2	19490822	10	57	162	91	93	0.7	0.56	myopic	-4	-2.75	102	-3.75	-1.25	101	10	0	0	0	0	0	0	0	0	0	0	0	0	0	0	10	0	0	0	0	0	0	0	0	0	0	0	0	0	0
726	1	19360522	4	76	170	104.5	105	0.14	0.3		1.75	-0.75	94	2	-1	74	10	0	0	0	0	0	0	0	0	0	0	0	0	0	0	20	2	0	0	0	0	0	0	0	0	0	0	0	0	0
727	2	19480424	3	61	161	96	101	0.44	0.4		2.5	-0.25	130	2	-0.25	58	20	2	0	0	0	0	0	0	0	0	0	0	0	0	0	10	0	0	0	0	0	0	0	0	0	0	0	0	0	0
728	2	19481206	3	61	154.5	92.5	96	0.1	0.32		0	-1.5	78	0.75	-2.25	73	31	2	0	0	0	0	0	0	0	0	0	0	0	0	0	31	2	0	0	0	0	0	0	0	0	0	0	0	0	0
729	2	19380712	8	75	150	102	116	0.22	1.1		0.25	-11.25	84	-1.25	-10.25	166	37	2	2	0	0	0	0	0	0	0	0	0	0	0	0	88	8	8	8	8	8	8	8	8	8	8	8	8	8	8
730	2	19371112	18	73	156	102	114	0.24	0.1		2.75	-1.25	89	2	-0.75	99	37	2	0	2	0	0	0	0	0	0	0	0	0	0	0	31	2	0	0	0	0	0	0	0	0	0	0	0	0	0
731	1	19541120	1	68	170	94	83	-0.02	0		1.25	-0.25	61	0.75	-0.25	94	37	2	0	2	0	0	0	0	0	0	0	0	0	0	0	10	0	0	0	0	0	0	0	0	0	0	0	0	0	0
732	1	19490814	4	89	165	107	112	0.1	1.6		2.5	-3	89	0.75	-4.75	92	10	0	0	0	0	0	0	0	0	0	0	0	0	0	0
733	2	19470608	3	96.5	159.5	130	111	0.2	0.18		1.25	-1.25	80	1	-0.75	72	14	0	0	2	0	0	0	0	0	0	0	0	0	0	0	43	2	2	0	2	0	0	0	0	0	0	0	0	0	0
734	1	19531205	8	79	172	105	107	-0.12	-0.16		0.5	0	0	1	-0.5	86	10	0	0	0	0	0	0	0	0	0	0	0	0	0	0	10	0	0	0	0	0	0	0	0	0	0	0	0	0	0
735	2	19580724	3	85	170	103	110	0.02	-0.02		1	-1.5	23	1	-0.75	150	10	0	0	0	0	0	0	0	0	0	0	0	0	0	0	10	0	0	0	0	0	0	0	0	0	0	0	0	0	0
736	2	19531215	18	56	157	94	95	0	0		1	-1.5	89	0.5	-1	94	10	0	0	0	0	0	0	0	0	0	0	0	0	0	0	10	0	0	0	0	0	0	0	0	0	0	0	0	0	0
737	2	19361221	12	62	143	97	102	0.32	0.42		4	-1.25	90	4.25	-0.75	150	20	2	0	0	0	0	0	0	0	0	0	0	0	0	0	20	2	0	0	0	0	0	0	0	0	0	0	0	0	0
738	2	19521003	14	73	167	100	107	0.08	0.02		1.5	-0.5	94	1.5	-0.25	83	20	2	0	0	0	0	0	0	0	0	0	0	0	0	0	20	2	0	0	0	0	0	0	0	0	0	0	0	0	0
739	1	19571005	4	70	161	97	96	0.52	0.44		2.25	-3.75	94	1.75	-3	94	15	2	0	0	0	0	0	0	0	0	0	0	0	0	0	31	2	0	1	0	0	0	0	0	0	0	0	0	0	0
740	2	19500410	6	69.5	154	107	109	0.7	0.64	myopic	-5	-0.75	80	-1	-2.25	80	88	8	8	8	8	8	8	8	8	8	8	8	8	8	8	10	0	0	0	0	0	0	0	0	0	0	0	0	0	0
741	2	19410813	12	74.5	154.5	107	110	0.24	0.3		3	-1	87	3.5	-1	77	31	2	0	0	0	0	0	0	0	0	0	0	0	0	0	20	2	0	0	0	0	0	0	0	0	0	0	0	0	0
742	1	19440926	5	80	172.5	103	102	0.02	0		1.75	-0.25	93	1.25	-0.75	84	10	0	0	0	0	0	0	0	0	0	0	0	0	0	0	10	0	0	0	0	0	0	0	0	0	0	0	0	0	0
743	2	19450320	10	59	151	95	98	0.08	0.06		1.25	-1	87	0.75	-1	91	15	2	0	0	0	0	0	0	0	0	0	0	0	0	0	10	0	0	0	0	0	0	0	0	0	0	0	0	0	0
744	2	19380505	3	63.5	160	105	98	0.68	0.44		3.75	-1	87	3.5	-1.5	91	37	2	2	0	0	0	0	0	0	0	0	0	0	0	0	43	4	2	0	0	0	0	0	0	0	0	2	0	0	0
745	2	19440319	20	56	150	95	99	0.38	0.3		2	-2	83	1	-0.25	158	37	2	2	2	0	0	0	0	0	0	0	0	0	0	0	43	3	2	2	1	0	0	0	0	0	0	3	0	2	0
746	1	19380322	1	59	159.5	93	92	0.1	0.1		1	-1.25	96	1.25	-2	82	31	2	0	0	0	0	0	0	0	0	0	0	0	0	0	10	0	0	0	0	0	0	0	0	0	0	0	0	0	0
747	1	19690505	10	77.5	178	100	101.5	0.14	0.12		-0.25	-1.5	96	0	-1.5	88	20	2	0	0	0	0	0	0	0	0	0	0	0	0	0	10	0	0	0	0	0	0	0	0	0	0	0	0	0	0
748	1	19651022	1	92	174.5	105.5	101	0.06	-0.08		-0.25	-0.5	78	0	-0.25	24	10	0	0	0	0	0	0	0	0	0	0	0	0	0	0	10	0	0	0	0	0	0	0	0	0	0	0	0	0	0
749	2	19660424	2	69	165	95.5	96	-0.02	0.04		0.25	-0.25	29	0.25	-0.5	148	43	2	0	2	2	0	0	0	0	0	0	0	0	0	0	31	2	0	1	0	0	0	0	0	0	0	0	0	0	0
750	2	19620527	4	61	158	95.5	91	0.1	0		-0.75	-0.5	47	-0.5	-0.25	15	31	2	0	0	0	0	0	0	0	0	0	0	0	0	0	31	2	0	0	0	0	0	0	0	0	0	0	0	0	0
751	2	19530609	2	70	158.5	102	106	0.3	0.28		-1	-1.5	88	-1	-0.75	84	10	0	0	0	0	0	0	0	0	0	0	0	0	0	0	10	0	0	0	0	0	0	0	0	0	0	0	0	0	0
752	2	19610317	3	59	158	96	97	0.04	0.02		0.5	-1	87	0.75	-1.25	97	10	0	0	0	0	0	0	0	0	0	0	0	0	0	0	20	2	0	0	0	0	0	0	0	0	0	0	0	0	0
753	2	19540706	3	87	158	109	108.5	1.32	0.3		-10.5	-1.25	43	1.75	-2	80	88	8	8	8	8	8	8	8	8	8	8	8	8	8	8	47	5	2	2	0	0	0	0	0	0	0	3	0	2	0
754	2	19541011	4	63	160	95	93.5	0.1	0.06		0.25	-0.5	68	0	-0.25	101	10	0	0	0	0	0	0	0	0	0	0	0	0	0	0	20	2	0	0	0	0	0	0	0	0	0	0	0	0	0
755	2	19560611	9	75	160	100	105.5	0.16	0.1		0	-0.25	39	0.25	-0.25	129	37	2	2	2	0	0	0	0	0	0	0	0	0	0	0	20	2	0	0	0	0	0	0	0	0	0	0	0	0	0
756	2	19600311	8	50	165	88	88	0.3	0.14		1.25	-3	90	1	-2	88	20	2	0	0	0	0	0	0	0	0	0	0	0	0	0	10	0	0	0	0	0	0	0	0	0	0	0	0	0	0
757	1	19351224	3	71	157	103	102	0.56	0.7	myopic	-4.75	-1	83	-6	-0.5	124	10	0	0	0	0	0	0	0	0	0	0	0	0	0	0	10	0	0	0	0	0	0	0	0	0	0	0	0	0	0
758	2	19520610	2	72	155	102	109	0.54	0.42		-1.75	-0.5	148	-2.25	-0.25	50	88	8	8	8	8	8	8	8	8	8	8	8	8	8	8	20	2	0	0	0	0	0	0	0	0	0	0	0	0	0
759	2	19571108	7	81.5	160	119	111	-0.04	0.2		0.5	-0.25	100	1.25	-0.25	137	10	0	0	0	0	0	0	0	0	0	0	0	0	0	0	10	0	0	0	0	0	0	0	0	0	0	0	0	0	0
760	1	19641102	5	65	169	93	93	0	0.72		0.75	-0.25	122	3.25	0	0	31	2	0	0	0	0	0	0	0	0	0	0	0	0	0	37	2	2	0	0	0	0	0	0	0	0	0	0	0	0
761	2	19600531	3	60	152.5	98.5	99	0	0.06		0.25	-0.25	8	0.75	-0.25	164	13	1	0	0	0	0	0	0	0	0	0	0	0	0	0	10	0	0	0	0	0	0	0	0	0	0	0	0	0	0
762	2	19400705	1	66.5	155	100	103	0.3	0.3		1.5	-0.75	91	1	-0.25	167	88	8	8	8	8	8	8	8	8	8	8	8	8	8	8	88	8	8	8	8	8	8	8	8	8	8	8	8	8	8
763	2	19490716	2	68	160	102	105	0.1	0.04		1.5	-0.75	88	1.5	-1	85	20	2	0	0	0	0	0	0	0	0	0	0	0	0	0	37	2	2	0	0	0	0	0	0	0	0	0	0	0	0
764	2	19450803	2	59	151	96	98	0.1	1.4		0.75	-0.75	82	-16.5	-1.5	156	10	0	0	0	0	0	0	0	0	0	0	0	0	0	0	20	2	0	0	0	0	0	0	0	0	0	0	0	0	0
765	2	19490704	12	83	153	121	111	0.18	0.22		0.25	-2.75	71	0.75	-0.5	90	31	2	0	0	0	0	0	0	0	0	0	0	0	0	0	20	2	0	0	0	0	0	0	0	0	0	0	0	0	0
766	1	19680425	3	89	170	105	104	0	0		0.5	-0.5	52	0.5	0	0	10	0	0	0	0	0	0	0	0	0	0	0	0	0	0	10	0	0	0	0	0	0	0	0	0	0	0	0	0	0
767	1	19440722	13	75	177	97	98	0.6	0.4		3.5	-1	94	3.5	-1	81	37	2	0	2	0	0	0	0	0	0	0	0	0	0	0	37	2	0	2	0	0	0	0	0	0	0	0	0	0	0
768	2	19530117	12	70	156	105	112	0.4	0.62		-1.25	-0.5	84	-1.75	-2	80	20	2	0	0	0	0	0	0	0	0	0	0	0	0	0	31	2	0	0	0	0	0	0	0	0	0	0	0	0	0
769	2	19630421	13	53.5	163	90	89	0.26	0.3		0	-0.75	132	0	-0.25	39	43	3	2	0	0	0	0	0	0	0	0	3	0	2	0	43	3	2	2	1	0	0	0	0	0	0	2	0	0	0
770	1	19430115	13	61.5	168	93	91	0.1	0.2		1.75	-1.5	102	2.75	-1.25	78	10	0	0	0	0	0	0	0	0	0	0	0	0	0	0	31	2	0	0	0	0	0	0	0	0	0	0	0	0	0
771	2	19510807	10	66.5	157	99	106	0.48	0.52		0.25	-0.5	82	0.5	-0.5	100	88	8	8	8	8	8	8	8	8	8	8	8	8	8	8	88	8	8	8	8	8	8	8	8	8	8	8	8	8	8
772	1	19671006	4	79	184	104	108	0.2	1.6		-0.75	-3.5	2	-7	-3.5	6	10	0	0	0	0	0	0	0	0	0	0	0	0	0	0	10	0	0	0	0	0	0	0	0	0	0	0	0	0	0
773	2	19541105	0	60	158	96	98	0.04	0.06		1	-1.5	94	1	-1.5	86	10	0	0	0	0	0	0	0	0	0	0	0	0	0	0	10	0	0	0	0	0	0	0	0	0	0	0	0	0	0
774	2	19470924	8	81	163	106.5	110	-0.06	0.02		1.25	-0.75	81	1.75	-0.75	101	37	2	2	0	0	0	0	0	0	0	0	0	0	0	0	37	2	2	2	0	0	0	0	0	0	0	0	0	0	0
775	1	19510904	12	58	171	90	92	1.1	0.2		5	-3.5	89	2	-1.5	83	31	2	0	0	0	0	0	0	0	0	0	0	0	0	0	37	2	2	0	0	0	0	0	0	0	0	0	0	0	0
776	1	19580209	9	58	165	94	87	0.1	0.22		1	-1.25	91	1.25	-1.5	92	13	1	0	0	0	0	0	0	0	0	0	0	0	0	0	37	2	0	2	0	0	0	0	0	0	0	0	0	0	0
777	1	19511226	14	71	176.5	97	97	0.22	0.1		0	-1.75	93	0.25	-1.75	101	47	4	2	2	0	0	2	0	0	0	0	0	0	0	0	43	3	2	0	0	0	0	0	0	0	0	0	0	0	0
778	1	19360611	13	65	164	101	102	0.12	1.1		0.5	-0.25	17	-2	-0.5	58	31	2	0	0	0	0	0	0	0	0	0	0	0	0	0	88	8	8	8	8	8	8	8	8	8	8	8	8	8	8
779	1	19690207	13	71	173	102	100	0	0.1		0.75	-0.75	11	0.5	-0.25	174	31	2	0	0	0	0	0	0	0	0	0	0	0	0	0	65	2	1	0	0	0	0	2	0	0	0	0	0	0	0
780	1	19680121	10	93	177	109	108	0.1	0.62		-5	-0.75	179	-5	-0.75	173	37	2	0	2	0	0	0	0	0	0	0	0	0	0	0	37	2	2	0	0	0	0	0	0	0	0	0	0	0	0
781	2	19520205	1	49	153	89	86.5	-0.08	0.02		0.75	-0.75	57	0	-0.25	77	37	2	0	2	0	0	0	0	0	0	0	0	0	0	0	37	2	0	2	0	0	0	0	0	0	0	0	0	0	0
782	1	19511201	1	96.5	175	108	111	-0.02	0.06		1	-0.5	97	1	-0.25	87	10	0	0	0	0	0	0	0	0	0	0	0	0	0	0	20	2	0	0	0	0	0	0	0	0	0	0	0	0	0
783	2	19521117	2	64	158	94	100.5	-0.08	0.04		0.5	-0.5	98	0.5	-0.75	91	20	2	0	0	0	0	0	0	0	0	0	0	0	0	0	20	2	0	0	0	0	0	0	0	0	0	0	0	0	0
784	2	19511101	2	49	150	89.5	87	0.02	0.14		1.5	-1.75	75	1.25	-1.5	97	10	0	0	0	0	0	0	0	0	0	0	0	0	0	0	10	0	0	0	0	0	0	0	0	0	0	0	0	0	0
785	2	19441007	4	59	152.5	97	101	0.1	0.1		1.5	-1.25	88	1.5	-1.5	97	15	2	0	0	0	0	0	0	0	0	0	0	0	0	0	37	2	2	0	0	0	0	0	0	0	0	0	0	0	0
786	1	19550409	4	89	172	109	112	-0.08	-0.08		0.75	0	0	0.75	-0.25	35	10	0	0	0	0	0	0	0	0	0	0	0	0	0	0	20	2	0	0	0	0	0	0	0	0	0	0	0	0	0
787	1	19510625	10	87	165	108	111	-0.02	0.14		0.25	-1	75	0.25	-1	114	37	2	0	2	0	0	0	0	0	0	0	0	0	0	0	31	2	0	0	0	0	0	0	0	0	0	0	0	0	0
788	1	19480311	4	69	173	96	95	0.48	0.46		2.5	-1.75	78	0.75	0.25	178	37	2	0	2	0	0	0	0	0	0	0	0	0	0	0	37	2	0	2	0	0	0	0	0	0	0	0	0	0	0
789	1	19430522	1	85.5	159	113	109	0.32	0.1		1	-2.75	110	0.5	-2.5	88	10	0	0	0	0	0	0	0	0	0	0	0	0	0	0	12	2	0	0	0	0	0	0	0	0	0	0	0	0	0
790	2	19500630	13	70	154	104	107	0.58	0.52	myopic	0.75	-0.25	96	1	-0.75	99	47	5	2	0	2	0	0	0	0	0	0	0	0	0	0	53	6	2	2	0	0	0	0	0	0	0	0	0	0	0
791	2	19490510	5	53	160	91	91.5	0.04	0.06		0.75	-0.25	106	0	-0.25	68	10	0	0	0	0	0	0	0	0	0	0	0	0	0	0	20	2	0	0	0	0	0	0	0	0	0	0	0	0	0
792	1	19501127	16	77	171	101	100	0.04	0		1	0.5	174	1	3	173	53	5	2	2	2	0	2	0	0	0	0	0	0	0	0	47	5	2	2	1	0	0	0	0	0	0	3	0	3	0
793	2	19511219	12	63	157.5	99	102.5	0.38	0.4		1.25	-1.75	83	1.5	-2	93	47	5	2	2	0	0	0	0	0	0	0	3	0	0	0	47	5	2	2	0	0	0	0	0	0	0	3	0	2	0
794	2	19380827	3	66	157.5	103	111	0.04	0.06		1.25	-4	79	0.5	-1.5	98	20	2	0	0	0	0	0	0	0	0	0	0	0	0	0	10	0	0	0	0	0	0	0	0	0	0	0	0	0	0
795	2	19560106	10	76	154	113	116	0	0		1.25	-1.25	80	1.25	-1	108	47	5	2	2	0	0	0	0	0	0	0	3	0	2	0	53	5	2	2	4	0	0	0	0	0	0	1	0	0	0
796	1	19560206	6	80	167	106	103	0.04	0.04		1.5	-1.5	80	1.5	-1.25	92	37	2	2	2	0	0	0	0	0	0	0	0	0	0	0	37	2	2	2	1	0	0	0	0	0	0	0	0	0	0
797	2	19551219	2	58	153.5	95	94	0	-0.1		1.25	-0.75	81	0.5	-0.25	131	10	0	0	0	0	0	0	0	0	0	0	0	0	0	0	10	0	0	0	0	0	0	0	0	0	0	0	0	0	0
798	1	19490427	4	86	182	107	109	0.2	0.16		1.75	-2.25	85	1.5	-3	98	10	0	0	0	0	0	0	0	0	0	0	0	0	0	0	10	0	0	0	0	0	0	0	0	0	0	0	0	0	0
799	2	19450129	6	56.5	151	96	100	0.1	0.06		0.75	-0.5	82	0.25	-1.5	84	37	2	2	0	0	0	0	0	0	0	0	0	0	0	0	37	2	2	0	0	0	0	0	0	0	0	0	0	0	0
800	1	19260809	11	81	171	108	109	0.1	1.7		1.5	-1	118	2	-1.5	78	10	0	0	0	0	0	0	0	0	0	0	0	0	0	0	12	0	2	0	0	0	0	0	0	0	0	7	0	0	0
801	2	19550518	4	68.5	151	103	105	-0.04	0.04		1	-0.5	46	1	-0.25	163	10	0	0	0	0	0	0	0	0	0	0	0	0	0	0	15	2	0	0	0	0	0	0	0	0	0	0	0	0	0
802	2	19490121	17	72	158	106	106	1.7	0.3		0.75	-1.25	97	1.75	-2	95	63	2	2	0	0	0	0	0	0	0	0	3	3	2	3	62	2	0	0	0	0	0	0	0	0	0	0	3	0	0
803	2	19610701	16	53	157	92.5	93	1.2	1.2	myopic	-10.25	-1.25	65	-13	-2.25	119	47	5	2	0	0	0	1	0	0	0	0	3	0	2	0	43	3	2	0	0	0	0	0	0	0	0	3	0	2	0
804	1	19390917	7	71	168	103	103	0.06	0.12		1.75	-1.25	87	1.75	-0.75	93	10	0	0	0	0	0	0	0	0	0	0	0	0	0	0	13	1	0	0	0	0	0	0	0	0	0	0	0	0	0
805	2	19430503	2	71	154	105	107	0.1	0.1		1.75	-1.25	79	3.25	-0.75	93	15	2	0	0	0	0	0	0	0	0	0	0	0	0	0	31	2	0	0	0	0	0	0	0	0	0	0	0	0	0
806	2	19530315	22	68	158	104	102	0	0		0.5	-0.5	78	0.75	-1	76	10	0	0	0	0	0	0	0	0	0	0	0	0	0	0	10	0	0	0	0	0	0	0	0	0	0	0	0	0	0
807	1	19630728	0	62.5	158	98	98.5	0.32	0.1		0.25	-0.5	53	0.25	-2	78	10	0	0	0	0	0	0	0	0	0	0	0	0	0	0	10	0	0	0	0	0	0	0	0	0	0	0	0	0	0
808	2	19611224	7	50	152	86.5	85	0.8	0.52	myopic	-2	-1.75	96	-1.75	-1.75	87	65	2	2	0	0	0	0	0	0	0	2	1	0	0	0	60	2	2	2	0	0	0	0	0	3	0	3	0	2	0
809	2	19520223	19	56.5	152	89	99	0.14	0.1		-0.5	-1	26	0	0	0	20	2	0	0	0	0	0	0	0	0	0	0	0	0	0	10	0	0	0	0	0	0	0	0	0	0	0	0	0	0
810	2	19501104	1	64	157	96	104	0.1	0.06		2	-1.5	86	1.75	-1	99	37	2	2	0	1	0	0	0	0	0	0	0	0	0	0	37	2	2	0	1	0	0	0	0	0	0	0	0	0	0
811	2	19341018	13	57.5	150.5	100.5	90	0.26	0.14		1.75	-0.5	131	0.75	-1.25	97	88	8	8	8	8	8	8	8	8	8	8	8	8	8	8	10	0	0	0	0	0	0	0	0	0	0	0	0	0	0
812	2	19400401	4	49	155.5	91	96	0.1	0.1		0.25	-0.75	94	-0.25	-1	117	15	2	0	0	0	0	0	0	0	0	0	0	0	0	0	15	2	0	0	0	0	0	0	0	0	0	0	0	0	0
813	2	19400620	18	56	152.5	96	100	1.52	1.5	myopic	-6	-2.5	83	-7.5	-2.25	84	43	4	2	0	0	0	0	0	0	0	0	3	0	0	0	47	5	2	0	0	0	0	0	0	0	0	0	0	0	0
814	2	19440721	16	71	160	99.5	96.5	0	0.1		2.75	-2.5	89	1.25	-1	101	37	2	2	0	0	0	0	0	0	0	0	2	0	0	0	37	2	2	0	0	0	0	0	0	0	0	0	0	0	0
815	2	19310117	17	63	156.5	100	105	0.38	1.1		2	-2.25	99	-0.5	-0.5	97	37	2	2	0	0	0	0	0	0	0	0	1	0	0	0	43	4	2	0	0	0	0	0	0	0	0	3	0	2	0
816	1	19361116	4	78	172	104	103	0.1	1.7		-0.75	-0.75	90	1.5	-1.5	75	20	2	0	0	0	0	0	0	0	0	0	0	0	0	0	20	2	0	0	0	0	0	0	0	0	0	0	0	0	0
817	2	19561022	10	56	157	89	82	0.12	0.28		1.25	-2	85	0.5	-2.75	63	20	2	0	0	0	0	0	0	0	0	0	0	0	0	0	31	2	0	0	0	0	0	0	0	0	0	0	0	0	0
818	2	19710705	5	77	170	102.5	101	0.44	-0.04		-1.5	-0.5	107	-1	-1	87	15	2	0	0	0	0	0	0	0	0	0	0	0	0	0	20	2	0	0	0	0	0	0	0	0	0	0	0	0	0
819	2	19490509	22	74.5	162	110	108	0.5	0.48		0.5	-4.5	81	-0.25	-3	86	31	2	0	0	0	0	0	0	0	0	0	0	0	0	0	31	2	0	0	0	0	0	0	0	0	0	0	0	0	0
820	2	19590317	7	74	163	106	108	0.22	0.24		0.25	-1.75	88	-0.25	-1.25	88	43	3	2	2	0	0	0	0	0	0	0	0	0	0	0	53	4	2	2	4	0	0	0	0	0	0	3	0	2	0
821	2	19551028	5	66	152.5	98	103	0.1	0.1		1.25	-0.75	29	1	-0.25	129	37	2	2	0	0	0	0	0	0	0	0	0	0	0	0	37	2	2	0	0	0	0	0	0	0	0	0	0	0	0
822	2	19491212	11	47	154	89	89	0.02	0.08		-0.25	-1	91	-0.5	-1.5	99	10	0	0	0	0	0	0	0	0	0	0	0	0	0	0	10	0	0	0	0	0	0	0	0	0	0	0	0	0	0
823	1	19591025	10	72	170	96	98.5	0.1	0.32		0	-0.25	108	-0.5	-0.25	44	37	2	2	0	0	0	0	0	0	0	0	0	0	0	0	37	2	2	2	0	0	0	0	0	0	0	0	0	0	0
824	2	19321021	1	58	153	102	112	1.1	0.26		-3	-1.75	44	1.75	-1.5	94	31	2	0	0	0	0	0	0	0	0	0	0	0	0	0	37	2	0	2	0	0	0	0	0	0	0	0	0	0	0
825	1	19631022	2	74	166	94.5	97.5	-0.1	-0.04		0.5	0	0	0.5	0	0	10	0	0	0	0	0	0	0	0	0	0	0	0	0	0	10	0	0	0	0	0	0	0	0	0	0	0	0	0	0
826	2	19420731	10	55	151	89	89	0.1	0.1		2.5	-1.5	82	1.5	-0.5	95	10	0	0	0	0	0	0	0	0	0	0	0	0	0	0	14	0	2	0	0	0	0	0	0	0	0	0	0	0	0
827	1	19360213	1	81	164	103	100	0.2	0.2		-0.5	0	0	-0.25	-0.25	148	20	2	0	0	0	0	0	0	0	0	0	0	0	0	0	10	0	0	0	0	0	0	0	0	0	0	0	0	0	0
828	2	19531228	8	71	162	99	104	0.34	0.46		-0.75	-0.25	58	-1	-0.5	107	13	1	0	0	0	0	0	0	0	0	0	0	0	0	0	20	2	1	0	0	0	0	0	0	0	0	0	0	0	0
829	1	19551004	0	75	170	100	99	-0.08	-0.08		0.25	-1	102	0	-0.25	60	13	0	0	1	0	0	0	0	0	0	0	0	0	0	0	10	0	0	0	0	0	0	0	0	0	0	0	0	0	0
830	2	19480928	24	60.5	151	97	104	0.6	0.1		1.5	-2.75	92	1	-1.25	81	10	0	0	0	0	0	0	0	0	0	0	0	0	0	0	37	2	0	2	0	0	0	0	0	0	0	0	0	0	0
831	2	19561002	9	75.5	167	103	109	0.2	0.12		-0.25	-1.5	109	0	-1.5	78	37	2	2	0	0	0	0	0	0	0	0	0	0	0	0	43	2	2	2	2	0	0	0	0	0	0	1	0	0	0
832	2	19600920	15	76.5	159	109	101.5	0.08	0.18		1.5	-0.75	79	1.5	-0.25	107
833	2	19400622	12	55.5	155	94	95	0.42	0.52		-0.5	-1.75	91	0	-1.25	97	10	0	0	0	0	0	0	0	0	0	0	0	0	0	0	10	0	0	0	0	0	0	0	0	0	0	0	0	0	0
834	2	19561104	10	75	152.5	103	111	0.02	0		1	-1.25	66	0.5	-0.5	96	31	2	0	0	0	0	0	0	0	0	0	0	0	0	0	15	2	0	0	0	0	0	0	0	0	0	0	0	0	0
835	2	19620210	12	74.5	168	102	102	0.42	0.1		0	-0.5	177	-0.25	-0.25	58	53	5	2	2	4	0	0	0	0	0	0	3	0	2	0	53	6	2	2	0	0	0	0	0	0	0	0	0	0	0
836	1	19430626	3	79	169	103	103	0.1	0.3		1.5	-0.5	92	2	-0.75	101	10	0	0	0	0	0	0	0	0	0	0	0	0	0	0	20	2	0	0	0	0	0	0	0	0	0	0	0	0	0
837	2	19580329	11	66	159	99.5	99	0.22	0.3		0.75	-1	104	-2.75	-0.25	64	53	6	2	2	1	0	0	0	0	0	0	3	0	2	0	53	6	2	0	0	0	0	0	0	0	0	1	0	0	0
838	1	19520707	25	70	165	102	97	-0.06	-0.02		1	-0.75	92	0.5	0	0	53	5	2	2	0	0	2	0	0	0	0	0	0	0	0	47	5	2	0	0	0	0	0	0	0	0	0	0	0	0
840	2	19540208	6	70	164.5	104	100	0.4	1.22		-1	-1	63	-5.5	-1.75	111	43	4	2	2	0	0	0	0	0	0	0	0	0	0	0	37	2	2	0	0	0	0	0	0	0	0	0	0	0	0
841	1	19520111	2	90	169	112	116.5	0.1	0.1		1.75	0	0	1.75	0	0	13	1	0	0	0	0	0	0	0	0	0	0	0	0	0	20	2	0	0	0	0	0	0	0	0	0	0	0	0	0
842	1	19391017	12	61	160	99	102	0.1	0.2		1	-0.75	60	1	-0.25	108	10	0	0	0	0	0	0	0	0	0	0	0	0	0	0	10	0	0	0	0	0	0	0	0	0	0	0	0	0	0
843	2	19520605	8	61	148	102	100	1.1	1.1	myopic	-5.25	-2.75	109	-12.25	-3	88	13	1	0	0	0	0	0	0	0	0	0	0	0	0	0	10	0	0	0	0	0	0	0	0	0	0	0	0	0	0
844	2	19490211	6	84	159	105	114	0.32	0.42		2.25	-2.75	85	1	-3.5	114	10	0	0	0	0	0	0	0	0	0	0	0	0	0	0	10	0	0	0	0	0	0	0	0	0	0	0	0	0	0
845	1	19520101	4	63	167	91	95	0.1	0		1	-1	83	0.25	0	0	10	0	0	0	0	0	0	0	0	0	0	0	0	0	0	20	2	0	0	0	0	0	0	0	0	0	0	0	0	0
846	2	19410214	2	50	156	94	94	0.3	0.34		1.75	-0.25	111	1.5	-0.5	18	20	2	0	0	0	0	0	0	0	0	0	0	0	0	0	20	2	0	0	0	0	0	0	0	0	0	0	0	0	0
847	2	19490122	10	64.5	152	103	99	0.1	0.1		0.75	-0.5	62	1	-0.75	115	10	0	0	0	0	0	0	0	0	0	0	0	0	0	0	10	0	0	0	0	0	0	0	0	0	0	0	0	0	0
848	2	19570426	12	63	159	99.5	102	-0.04	0.02		1	-1	69	0.75	-1	77	37	2	2	0	0	0	0	0	0	0	0	0	0	0	0	37	2	0	2	0	0	0	0	0	0	0	0	0	0	0
849	2	19410921	9	55.5	149	101	102	0.1	0.14		2.5	-1.25	82	2.25	-0.75	88	37	2	0	2	0	0	0	0	0	0	0	0	0	0	0	37	2	0	2	0	0	0	0	0	0	0	0	0	0	0
850	2	19501219	13	67.5	168	97	97	0.1	0.1		1.25	-1	93	0.75	-0.5	105	31	2	0	1	0	0	0	0	0	0	0	0	0	0	0	20	2	0	0	0	0	0	0	0	0	0	0	0	0	0
851	1	19290620	5	65	169	98	96	0.42	0.28		3.75	-1.5	98	3.75	-1.5	83	15	2	0	0	0	0	0	0	0	0	0	0	0	0	0	88	8	8	8	8	8	8	8	8	8	8	8	8	8	8
852	1	19450120	4	92	171	110	104.5	-0.04	0.02		1.25	-0.75	77	1.5	-1	99	31	2	0	0	0	0	0	0	0	0	0	0	0	0	0	10	0	0	0	0	0	0	0	0	0	0	0	0	0	0
853	2	19370515	40	63	145	101	100	1.22	0.4		1.5	-2	80	0.75	-1.5	103	37	2	2	0	0	0	0	0	0	0	0	3	0	2	3	37	2	2	0	0	0	0	0	0	0	0	3	0	2	3
854	1	19640315	1	67	166	98	95	-0.02	-0.04		0.5	-0.5	87	0.25	0	0	10	0	0	0	0	0	0	0	0	0	0	0	0	0	0	31	2	0	0	0	0	0	0	0	0	0	0	0	0	0
855	2	19510628	2	57	148	94	94	0.1	0.26		1.25	-1.5	90	1.25	-1.75	96	31	2	0	0	0	0	0	0	0	0	0	0	0	0	0	10	0	0	0	0	0	0	0	0	0	0	0	0	0	0
856	1	19620205	10	74	172	100	101	1.3	0.48		-9.25	-1.75	102	-1.25	-1.5	90	37	2	2	0	0	0	0	0	0	0	0	0	0	0	0	43	3	2	2	0	0	0	0	0	0	0	2	0	0	0
857	1	19600414	0	79	178	100	102	0.1	0.2		-0.75	-1	60	-0.75	-0.75	99	10	0	0	0	0	0	0	0	0	0	0	0	0	0	0	20	2	0	0	0	0	0	0	0	0	0	0	0	0	0
858	2	19551212	2	53	162	89.5	92	0.34	0.32		-1	-1.5	64	-1.5	-1.25	109	37	2	2	2	0	0	0	0	0	0	0	0	0	0	0	37	2	0	2	0	0	0	0	0	0	0	0	0	0	0
859	2	19610114	1	65	156	93.5	93	1.1	1.2	myopic	-7.75	-0.25	108	-13.5	-1.5	91	10	0	0	0	0	0	0	0	0	0	0	0	0	0	0	20	2	0	0	0	0	0	0	0	0	0	0	0	0	0
860	2	19420416	6	58	163	96	98	0.3	0.4		-0.5	-1.5	74	-0.75	-1.5	97	20	2	0	0	0	0	0	0	0	0	0	0	0	0	0	31	2	0	0	0	0	0	0	0	0	0	0	0	0	0
861	2	19381227	21	61	153.5	97	97	0.34	0.32		-1.25	-0.25	94	-0.5	-2	89	20	2	0	0	0	0	0	0	0	0	0	0	0	0	0	31	2	0	0	0	0	0	0	0	0	0	0	0	0	0
862	2	19470504	10	53.5	150	96	102	0.1	0.16		1.25	-1	121	1.5	-0.75	89	20	2	0	0	0	0	0	0	0	0	0	0	0	0	0	37	2	2	2	0	0	0	0	0	0	0	0	0	0	0
863	1	19561209	1	90	170	104	103	1.1	1.1	myopic	-5.25	-0.25	61	-2.5	-1	12	47	5	2	2	0	0	0	0	0	0	0	2	0	0	0	53	6	2	0	4	0	0	0	1	0	0	1	0	0	0
864	2	19531117	0	49	139	95	89	0.4	0.34		-0.75	-2	67	-0.75	-2	103	20	2	0	0	0	0	0	0	0	0	0	0	0	0	0	10	0	0	0	0	0	0	0	0	0	0	0	0	0	0
865	2	19670226	10	83	160	110	110	0.1	0.6		-0.75	0	0	-0.5	-0.25	165	71	2	2	2	4	0	0	3	3	2	0	3	0	2	0	71	2	2	2	4	2	0	3	3	4	0	0	0	0	0
866	1	19450403	16	64	161	98	92	0.6	0.36		8.25	-4.25	119	4.75	-2	53	43	4	0	2	0	0	0	0	0	0	0	0	0	0	0	37	2	0	2	0	0	0	0	0	0	0	0	0	0	0
867	1	19430315	14	65	163	99	98	0.4	1.1		1.25	-1	162	-5.5	-3.5	35	31	2	0	0	0	0	0	0	0	0	0	0	0	0	0	88	8	8	8	8	8	8	8	8	8	8	8	8	8	8
868	2	19541215	3	73.5	157	107	106	0.04	0.06		1.25	-1	93	0.75	0	0	10	0	0	0	0	0	0	0	0	0	0	0	0	0	0	10	0	0	0	0	0	0	0	0	0	0	0	0	0	0
869	2	19500126	11	74	159	104	105	0.38	0.42		-2.25	-0.5	85	-2.25	-0.5	95	37	2	2	0	0	0	0	0	0	0	0	0	0	0	0	37	2	2	0	0	0	0	0	0	0	0	0	0	0	0
870	2	19530502	12	65	158	103	102	0.1	0.24		1.75	-1.25	2	1.75	-0.75	5	20	2	0	0	0	0	0	0	0	0	0	0	0	0	0	10	0	0	0	0	0	0	0	0	0	0	0	0	0	0
871	1	19520306	10	72.5	163	99	97	-0.06	0.02		0.75	-0.75	84	0.75	-1	85	37	2	2	2	0	0	0	0	0	0	0	0	0	0	0	31	2	0	0	0	0	0	0	0	0	0	0	0	0	0
872	1	19511001	5	73	166	102	99.5	0.1	0.1		2	-0.5	63	2.75	-1.25	98	10	0	0	0	0	0	0	0	0	0	0	0	0	0	0	37	2	0	2	0	0	0	0	0	0	0	0	0	0	0
873	2	19570416	18	68	158	99	100	-0.06	0.04		0.75	-0.75	82	1	-0.75	84	37	2	2	2	0	0	0	0	0	0	0	0	0	0	0	37	3	1	0	1	0	0	0	0	0	0	0	0	0	0
874	2	19421229	8	55	152	97	95	0.02	0.2		0.5	-0.25	49	1	-1.5	102	20	2	0	0	0	0	0	0	0	0	0	0	0	0	0	20	2	0	0	0	0	0	0	0	0	0	0	0	0	0
875	2	19600827	1	58.5	163	94	95	0	0		0	-0.25	177	0.25	-0.25	15	10	0	0	0	0	0	0	0	0	0	0	0	0	0	0	10	0	0	0	0	0	0	0	0	0	0	0	0	0	0
876	1	19541214	15	79.5	171	104	97	0.1	0.02		0	-0.75	73	0	-0.5	86	31	2	0	0	0	0	0	0	0	0	0	0	0	0	0	31	2	0	0	0	0	0	0	0	0	0	0	0	0	0
877	2	19491015	6	67	158	106	98	0	0.48		0.25	-1.75	82	2.5	-2.25	134	31	2	0	0	0	0	0	0	0	0	0	0	0	0	0	20	2	0	0	0	0	0	0	0	0	0	0	0	0	0
878	2	19390301	8	64	157	111	111	0.02	0.42		0.5	-0.5	109	-1	-0.25	136	31	2	0	0	0	0	0	0	0	0	0	0	0	0	0	88	8	8	8	8	8	8	8	8	8	8	8	8	8	8
879	2	19600128	12	72	166	105.5	101	0.04	0.04		0.25	-0.5	93	0.5	-0.75	69	47	5	2	2	0	0	0	0	0	0	0	0	0	0	0	37	2	0	2	1	0	0	0	0	0	0	0	0	0	0
880	1	19630516	5	103	178	113	110	0	0		0.5	-0.25	93	0.25	-0.25	153	37	2	0	2	0	0	0	0	0	0	0	0	0	0	0	31	2	0	0	0	0	0	0	0	0	0	0	0	0	0
881	1	19490828	2	78	167	104.5	106	0.26	0.1		2.25	-0.5	67	1.75	0	0	20	2	0	0	0	0	0	0	0	0	0	0	0	0	0	20	2	0	0	0	0	0	0	0	0	0	0	0	0	0
882	2	19541215	0	80	162	111	106	1.1	1.1	myopic	-4.75	-3.5	81	-5.5	-3.5	83	10	0	0	0	0	0	0	0	0	0	0	0	0	0	0	13	1	0	0	0	0	0	0	0	0	0	0	0	0	0
883	1	19550208	7	80	171	102	102	0.6	0.3		-2.25	-1.5	67	-1.75	-1.25	113	12	2	0	0	2	0	0	0	0	0	0	0	2	0	0	10	0	0	0	0	0	0	0	0	0	0	0	0	0	0
884	2	19470114	4	63	151	103.5	106	1.1	1.1	myopic	-6.75	-2.75	72	-3	-1.25	102	10	0	0	0	0	0	0	0	0	0	0	0	0	0	0	10	0	0	0	0	0	0	0	0	0	0	0	0	0	0
885	2	19450715	8	59.5	151	100	99	0.32	0.38		0.75	-4.5	89	0.75	-4.25	92	15	2	0	0	0	0	0	0	0	0	0	0	0	0	0	88	8	8	8	8	8	8	8	8	8	8	8	8	8	8
886	2	19561123	3	68	151	101.5	108	0	0.02		1	-1	77	1	-0.5	97	20	2	0	0	0	0	0	0	0	0	0	0	0	0	0	20	2	0	0	0	0	0	0	0	0	0	0	0	0	0
887	1	19520506	3	63	163	97	92	-0.04	-0.02		0.5	0	0	0.75	-0.5	82	31	2	0	0	0	0	0	0	0	0	0	0	0	0	0	10	0	0	0	0	0	0	0	0	0	0	0	0	0	0
888	2	19620712	17	53	155	91.5	86	0.36	0.42		-1.75	-1.75	156	-1	-5.25	25	37	2	2	0	0	0	0	0	0	0	0	0	0	0	0	20	2	0	0	0	0	0	0	0	0	0	0	0	0	0
889	2	19561124	2	61	158	100	91	-0.02	0.08		2	-0.5	76	1.75	-0.75	120	31	2	0	0	0	0	0	0	0	0	0	0	0	0	0	31	2	0	0	0	0	0	0	0	0	0	0	0	0	0
890	2	19540720	4	50	153	90	82	0.04	-0.02		-0.25	-0.5	98	0.5	-0.5	83	20	2	0	0	0	0	0	0	0	0	0	0	0	0	0	37	2	0	2	0	0	0	0	0	0	0	0	0	0	0
891	2	19470426	9	70	146	111	113	1.14	1.1	myopic	-4.5	-2.75	77	-2.75	-2.25	93	31	2	0	0	0	0	0	0	0	0	0	0	0	0	0	31	2	0	0	0	0	0	0	0	0	0	0	0	0	0
892	1	19551117	11	75	174	97.5	96	0	-0.06		0.25	-0.5	78	0.25	-0.5	50	37	2	0	2	0	0	0	0	0	0	0	0	0	0	0	37	2	2	0	0	0	0	0	0	0	0	0	0	0	0
893	2	19510113	7	104	155	141	137	0.1	0		1.5	-1.75	83	1.25	-1	101	31	2	0	0	0	0	0	0	0	0	0	0	0	0	0	20	2	0	0	0	0	0	0	0	0	0	0	0	0	0
894	2	19561009	8	67	150	105	105	0.1	0.1		0.75	0	0	1.25	-0.5	88	37	2	2	0	0	0	0	0	0	0	0	0	0	0	0	31	2	0	0	0	0	0	0	0	0	0	0	0	0	0
895	2	19571101	1	49	155	92	88	0.9	0.66	myopic	-4.5	-1.5	85	-1.75	-1.5	91	37	2	0	2	0	0	0	0	0	0	0	8	0	8	0	37	2	0	2	0	0	0	0	0	0	0	3	0	0	0
896	2	19580612	10	63	155	101	97	0.02	0.18		0	-1	88	0.25	-1.75	103	53	6	2	2	2	0	0	0	0	0	0	3	0	2	0	53	6	2	2	0	0	0	0	0	0	0	0	0	0	0
897	1	19471207	3	72	170	105	104	0.2	0.1		1.25	-2	79	0.75	-1.25	97	10	0	0	0	0	0	0	0	0	0	0	0	0	0	0	10	0	0	0	0	0	0	0	0	0	0	0	0	0	0
898	2	19440905	3	64	154	107.5	104	1.1	1.1	cataract	8.75	-5.25	158	8.75	-4.75	22	88	8	8	8	8	8	8	8	8	8	8	8	8	8	8	88	8	8	8	8	8	8	8	8	8	8	8	8	8	8
899	2	19580530	20	49	159	92	89	0.1	0.06		0.75	-0.75	95	1	-0.75	84	31	2	0	0	0	0	0	0	0	0	0	0	0	0	0	31	2	0	0	0	0	0	0	0	0	0	0	0	0	0
900	2	19531102	5	60	153	96	95	-0.08	0.04		0.5	0	0	0.75	-0.75	105	31	2	0	0	0	0	0	0	0	0	0	0	0	0	0	31	2	0	0	0	0	0	0	0	0	0	0	0	0	0
901	2	19641130	4	77	163	105	105	-0.06	0		0.5	-0.5	92	0.25	-0.25	75	31	2	0	0	0	0	0	0	0	0	0	0	0	0	0	10	0	0	0	0	0	0	0	0	0	0	0	0	0	0
902	1	19531204	3	82	169	110	106	0.02	0.04		0.75	-1.25	90	0.75	-1	92	10	0	0	0	0	0	0	0	0	0	0	0	0	0	0	10	0	0	0	0	0	0	0	0	0	0	0	0	0	0
903	2	19470527	1	95	152	138	128	0.1	0.1		0.25	0	0	1	-0.75	106	88	8	8	8	8	8	8	8	8	8	8	8	8	8	8	88	8	8	8	8	8	8	8	8	8	8	8	8	8	8
904	1	19480826	7	72	167	109	107	-0.06	-0.06		1	-0.75	78	1.25	-0.75	85	31	2	0	0	0	0	0	0	0	0	0	0	0	0	0	31	2	0	0	0	0	0	0	0	0	0	0	0	0	0
905	2	19660607	0	78	162	112	99	0	0.04		0.75	0	0	1	-0.75	109	10	0	0	0	0	0	0	0	0	0	0	0	0	0	0	10	0	0	0	0	0	0	0	0	0	0	0	0	0	0
906	1	19461007	6	63	162	101	97	-0.06	-0.04		0.5	-1.25	79	1.5	-1.75	102	10	0	0	0	0	0	0	0	0	0	0	0	0	0	0	10	0	0	0	0	0	0	0	0	0	0	0	0	0	0
907	2	19690814	5	72	160	104	106	0.52	0.2		-1.25	-1.75	80	-1.25	-0.25	96	20	2	0	0	0	0	0	0	0	0	0	0	0	0	0	31	2	0	0	0	0	0	0	0	0	0	0	0	0	0
908	2	19690814	3	74	165	104	102	0.1	0.1		-1.25	-0.5	82	-1.25	-0.5	79	10	0	0	0	0	0	0	0	0	0	0	0	0	0	0	10	0	0	0	0	0	0	0	0	0	0	0	0	0	0
909	1	19570310	10	84	166	105	101	0.1	0		-0.75	-0.75	85	0	-0.75	99	37	2	2	2	0	0	0	0	0	0	0	0	0	0	0	37	2	0	2	0	0	0	0	0	0	0	0	0	0	0
910	1	19511202	0	63	161	99	92	1.1	0.7	myopic	-6	-2.25	73	-4.25	-2	102	10	0	0	0	0	0	0	0	0	0	0	0	0	0	0	15	2	0	0	0	0	0	0	0	0	0	0	0	0	0
911	2	19510403	11	67	154	106	104	0.1	0.1		0.75	-1.5	87	1	-1.75	100	10	0	0	0	0	0	0	0	0	0	0	0	0	0	0	13	1	0	0	0	0	0	0	0	0	0	0	0	0	0
912	1	19540401	3	83	166	109	112	0.4	0.32		2	-0.25	34	2.25	-0.5	170	10	0	0	0	0	0	0	0	0	0	0	0	0	0	0	20	2	0	0	0	0	0	0	0	0	0	0	0	0	0
913	2	19401019	13	67.5	158	109	109	0.14	0.1		1.75	-1.25	86	0.75	-0.25	80	20	2	0	0	0	0	0	0	0	0	0	0	0	0	0	15	2	0	0	0	0	0	0	0	0	0	0	0	0	0
914	1	19490905	4	65	163	101	97	0.04	0.1		0.5	-1.5	12	0.5	-1.5	176	10	0	0	0	0	0	0	0	0	0	0	0	0	0	0	10	0	0	0	0	0	0	0	0	0	0	0	0	0	0
915	2	19530108	15	65	168	103	102	1.24	1.1	myopic	-5	-0.5	93	0	-0.5	100	64	4	2	0	0	0	0	0	0	0	0	3	3	2	0	64	4	2	0	0	0	0	0	0	0	0	3	3	3	0
916	1	19471130	2	83	170	108	105	0.1	0.28		1	-2	78	1	-1.5	109	10	0	0	0	0	0	0	0	0	0	0	0	0	0	0	20	2	0	0	0	0	0	0	0	0	0	0	0	0	0
917	2	19441103	4	91	159	116.5	104	0.1	0.02		1.5	-0.5	90	1.5	-0.75	82	20	2	0	0	0	0	0	0	0	0	0	0	0	0	0	20	2	0	0	0	0	0	0	0	0	0	0	0	0	0
918	2	19430203	10	57	153	101	98	0.1	0.1		0.25	-1.25	94	-0.25	-0.75	98	10	0	0	0	0	0	0	0	0	0	0	0	0	0	0	31	2	0	0	0	0	0	0	0	0	0	0	0	0	0
919	2	19441005	10	54	152.5	93	88	0.34	0.1		1	-0.75	178	2	-1	94	31	2	0	0	0	0	0	0	0	0	0	0	0	0	0	31	2	0	0	0	0	0	0	0	0	0	0	0	0	0
920	2	19551004	6	70	160	100.5	105	0.1	0.04		1.5	-0.5	177	1.75	-0.25	153	20	2	0	0	0	0	0	0	0	0	0	0	0	0	0	37	2	0	2	0	0	0	0	0	0	0	0	0	0	0
921	1	19530802	3	77	165	105.5	103	-0.08	-0.08		0.5	-0.25	17	0.5	0	0	10	0	0	0	0	0	0	0	0	0	0	0	0	0	0	31	2	0	0	0	0	0	0	0	0	0	0	0	0	0
922	1	19760505	6	84	171	104	95	0.8	0.8	myopic	-4.5	-0.5	44	-4.25	-0.25	146	62	2	0	0	0	0	0	0	0	0	0	0	3	0	0	63	2	0	0	0	0	0	0	0	0	0	0	3	0	0
923	2	19530606	10	55	156	95	89	0	0.4		1.25	-0.5	85	1	-0.75	78	20	2	0	0	0	0	0	0	0	0	0	0	0	0	0	10	0	0	0	0	0	0	0	0	0	0	0	0	0	0
924	1	19530610	7	65	163	98.5	98	0.1	0.4		1.5	-0.25	33	0.5	-0.25	122	10	0	0	0	0	0	0	0	0	0	0	0	0	0	0	15	2	0	0	0	0	0	0	0	0	0	0	0	0	0
925	2	19550722	4	75	166	110	107	1.12	1.1	myopic	-10	-1.75	114	-9.75	-0.75	81	10	0	0	0	0	0	0	0	0	0	0	0	0	0	0	10	0	0	0	0	0	0	0	0	0	0	0	0	0	0
926	1	19360110	18	75	164.5	110	109	0.4	0.4		2.5	-0.75	65	2.25	-0.5	107	88	8	8	8	8	8	8	8	8	8	8	8	8	8	8	88	8	8	8	8	8	8	8	8	8	8	8	8	8	8
927	1	19570127	7	91	179	112	115	0	0.1		1	0	0	1.25	-0.25	141
928	1	19761224	2	80	172	103.5	100	-0.14	-0.16		0.5	-0.25	91	0	-0.25	81	10	0	0	0	0	0	0	0	0	0	0	0	0	0	0	10	0	0	0	0	0	0	0	0	0	0	0	0	0	0
929	2	19550808	3	65	160	106	105	0.42	0.66		-0.75	-0.75	161	-0.75	-2.25	27	10	0	0	0	0	0	0	0	0	0	0	0	0	0	0	10	0	0	0	0	0	0	0	0	0	0	0	0	0	0
930	2	19560408	2	69	160	97	100	0.2	0.1		-0.5	-0.75	95	-0.5	-0.25	65	10	0	0	0	0	0	0	0	0	0	0	0	0	0	0	20	2	0	0	0	0	0	0	0	0	0	0	0	0	0
931	2	19510112	8	50	151	97	93	0.1	0		0.25	-1.5	8	0.25	-0.25	175	37	2	2	0	0	0	0	0	0	0	0	0	0	0	0	37	2	2	0	0	0	0	0	0	0	0	1	0	0	0
932	2	19360809	1	77	151	110	113	0.42	0.1		3	-1.5	78	2.5	-0.5	116	10	0	0	0	0	0	0	0	0	0	0	0	0	0	0	10	0	0	0	0	0	0	0	0	0	0	0	0	0	0
933	1	19470912	3	75	162	112	105	0.06	0.1		0.5	-0.75	128	1.5	-0.25	49	10	0	0	0	0	0	0	0	0	0	0	0	0	0	0	20	2	0	0	0	0	0	0	0	0	0	0	0	0	0
934	2	19541011	3	58	160	99	93	0.24	0.22		1.25	-1.75	90	2	-1	76	10	0	0	0	0	0	0	0	0	0	0	0	0	0	0	10	0	0	0	0	0	0	0	0	0	0	0	0	0	0
935	2	19310610	9	62	153	100	94	0.3	0.7		-0.25	-1	85	-2	-2	107	10	0	0	0	0	0	0	0	0	0	0	0	0	0	0	15	2	0	0	0	0	0	0	0	0	0	0	0	0	0
936	2	19501112	4	76	149	111	109	0.06	0.1		2.5	-1.25	88	2.25	-1.25	93	31	2	0	0	0	0	0	0	0	0	0	0	0	0	0	31	2	0	0	0	0	0	0	0	0	0	0	0	0	0
937	1	19500301	20	63	164	99	95	0	0.62		1.25	-0.75	89	-2.5	-1.25	88	10	0	0	0	0	0	0	0	0	0	0	0	0	0	0	10	0	0	0	0	0	0	0	0	0	0	0	0	0	0
938	2	19440112	18	62	151	106	103	0.1	0.1		1.75	-0.75	90	1.25	-0.75	85	37	2	2	0	0	0	0	0	0	0	0	1	0	0	0	37	2	2	0	0	0	0	0	0	0	0	3	0	2	0
939	1	19621119	17	79	172	102	101	0.3	0.6		2	-0.25	65	1.25	-0.5	177	64	2	2	0	0	0	0	0	1	0	0	3	3	2	0	63	2	0	0	0	0	0	1	0	4	0	0	3	0	0
940	1	19490123	2	84	171	107.5	110	0.46	0.4		-3	0	0	-2.5	-0.5	112	10	0	0	0	0	0	0	0	0	0	0	0	0	0	0	10	0	0	0	0	0	0	0	0	0	0	0	0	0	0
941	2	19500624	6	74	160	111.5	107	0.1	0.32		0.5	-1.25	100	0.5	-1.5	85	37	2	2	0	0	0	0	0	0	0	0	0	0	0	0	20	2	0	0	0	0	0	0	0	0	0	0	0	0	0
942	1	19641230	14	65	171	101	94	0.4	0.4		0.25	-0.5	86	0.5	-1	100	20	2	0	0	0	0	0	0	0	0	0	0	0	0	0	20	2	0	0	0	0	0	0	0	0	0	0	0	0	0
943	1	19650412	8	65	167	96.5	92	1.48	1.44	myopic	-14.5	-0.75	95	-14.25	-0.5	5	10	0	0	0	0	0	0	0	0	0	0	0	0	0	0	20	2	0	0	0	0	0	0	0	0	0	0	0	0	0
944	2	19450712	18	62	164	93	95	1.1	1.1	cataract	-8.5	-1.5	69	-12.75	-1	62	88	8	8	8	8	8	8	8	8	8	8	8	8	8	8	88	8	8	8	8	8	8	8	8	8	8	8	8	8	8
945	2	19651124	10	75	160	103.5	106	0.1	0.06		-0.75	-0.25	20	-0.5	-0.75	164	20	2	0	0	0	0	0	0	0	0	0	0	0	0	0	20	2	0	0	0	0	0	0	0	0	0	0	0	0	0
946	2	19370303	20	80	155	118	116	0.4	0.4		2	-0.5	64	2.25	-1.25	101	53	6	0	2	0	0	0	0	0	0	0	2	0	0	0	47	5	2	2	0	0	0	0	0	0	0	0	0	0	0
947	1	19600723	8	72	168	103	100	1.1	1.1	myopic	-4	-1.25	140	-5.5	-2	44	43	2	0	0	2	0	0	0	0	0	0	0	0	0	0	31	2	0	0	0	0	0	0	0	0	0	0	0	0	0
948	1	19611125	2	75	159	105	106.5	0.1	0.1		2.25	-0.5	83	2	-0.5	94	15	2	0	0	0	0	0	0	0	0	0	0	0	0	0	20	2	0	0	0	0	0	0	0	0	0	0	0	0	0
949	1	19610522	1	71	171	107	102	0.36	-0.12		-1	-1	66	0	-0.5	147	10	0	0	0	0	0	0	0	0	0	0	0	0	0	0	10	0	0	0	0	0	0	0	0	0	0	0	0	0	0
950	1	19491213	12	79	169	105	104	0.1	0.04		0.75	-0.75	95	1.25	-1.25	89	53	5	2	2	0	0	2	0	0	0	0	0	0	0	0	53	2	0	0	4	0	0	0	0	0	0	0	0	0	0
951	1	19570527	10	91	184	116	107	0.2	0.24		-1.5	-0.75	66	-1.25	-0.75	110	10	0	0	0	0	0	0	0	0	0	0	0	0	0	0	10	0	0	0	0	0	0	0	0	0	0	0	0	0	0
952	2	19460902	8	66	152.5	97	102	0.1	1.1		0.75	-0.75	90	-6	-0.75	39	31	2	0	0	0	0	0	0	0	0	0	0	0	0	0	10	0	0	0	0	0	0	0	0	0	0	0	0	0	0
953	2	19481112	9	59	153.5	103	102	0.1	0.1		-0.25	-1	93	-0.75	-0.5	75	53	2	2	2	4	0	3	0	0	0	0	0	0	0	0	37	2	2	0	0	0	0	0	0	0	0	2	0	0	0
954	1	19521101	5	76	174	101	102.5	0.04	0		0	-0.5	6	0.25	0	0	15	2	0	0	0	0	0	0	0	0	0	0	0	0	0	10	0	0	0	0	0	0	0	0	0	0	0	0	0	0
955	1	19520429	6	84	168	110	111	0.1	0.1		0.75	-1	73	0.75	-1	95	20	2	0	0	0	0	0	0	0	0	0	0	0	0	0	15	2	0	0	0	0	0	0	0	0	0	0	0	0	0
956	1	19391212	26	87	169.5	109	114	1.7	1.2	cataract				-6.75	0	0	88	8	8	8	8	8	8	8	8	8	8	8	8	8	8	88	8	8	8	8	8	8	8	8	8	8	8	8	8	8
957	2	19290128	12	46	144.5	94	95	0.22	1.7		1	-1.25	81				31	2	0	0	0	0	0	0	0	0	0	0	0	0	0
958	2	19531014	27	62	158	100	103	0.64	1.34	myopic	4	-0.75	93	5.75	-0.5	90	64	2	0	0	2	0	0	0	0	0	0	3	3	2	0	63	2	0	0	0	0	0	0	0	0	0	1	3	0	3
959	1	19520617	3	78	170.5	103	99	0.2	0.1		3	-1.25	74	1.75	-0.75	92	53	6	2	2	2	0	2	0	0	0	0	2	0	0	0	53	5	2	2	4	0	0	0	0	0	0	3	0	2	0
960	1	19441012	1	75	166	105	104	0.06	0.16		0.25	-1.25	88	0	-1.25	90	20	2	0	0	0	0	0	0	0	0	0	0	0	0	0	13	0	1	0	0	0	0	0	0	0	0	0	0	0	0
961	2	19570225	15	79	160	108	105	0.2	1.7		0.75	-1.5	79				53	2	2	0	4	0	0	0	1	0	0	0	0	0	0	88	8	8	8	8	8	8	8	8	8	8	8	8	8	8
962	2	19471019	2	54	152.5	96	94	0.06	1.1		0.25	-0.75	66	-10.5	-0.25	119	10	0	0	0	0	0	0	0	0	0	0	0	0	0	0	10	0	0	0	0	0	0	0	0	0	0	0	0	0	0
963	1	19410804	10	76	169	100	106	0.1	0.3		-0.25	-0.5	20	-1.5	-1	69	37	2	2	0	0	0	0	0	0	0	0	0	0	0	0	63	2	0	0	0	0	0	0	0	0	0	0	3	0	0
964	1	19520225	0	86	172	108	107.5	0.04	0.8		1.75	-1.75	92	1.5	-1.5	96	10	0	0	0	0	0	0	0	0	0	0	0	0	0	0	10	0	0	0	0	0	0	0	0	0	0	0	0	0	0
965	1	19540827	6	84	170	106.5	101	0.2	0.2		1.5	-0.75	26	0.5	-0.5	145	20	2	0	0	0	0	0	0	0	0	0	0	0	0	0	10	0	0	0	0	0	0	0	0	0	0	0	0	0	0
966	2	19650809	10	69.5	162	97	101	-0.06	0.04		0.75	-1	72	-0.25	-0.25	92	64	6	2	2	2	0	3	0	0	0	0	3	3	2	0	64	6	2	0	2	0	0	0	0	0	0	3	3	2	0
967	1	19451012	15	77	166	103	101	1.1	1.1	myopic	3.5	-2.25	96	-2	-1.5	93	37	2	2	0	0	0	0	0	0	0	0	0	0	0	0	20	2	0	0	0	0	0	0	0	3	0	0	0	0	0
968	1	19551019	15	85	181	112	112	0.1	0.7		0.75	-0.25	50	0.25	-0.25	103	64	2	0	0	0	2	2	0	0	0	0	3	7	2	0	65	2	2	0	2	0	0	0	2	2	0	3	7	2	0
969	1	19210223	30	57	161.5	96	98	0.4	1.7		1.75	-2.5	92				53	3	2	0	4	0	2	0	0	0	0	3	0	0	0
970	1	19600828	20	92	174	109	106	-0.06	0.02		0.5	-0.25	20	0.5	-0.25	131	53	4	2	2	4	0	0	0	0	0	0	0	0	0	0	37	2	2	2	0	0	0	0	0	0	0	0	0	0	0
971	1	19491031	18	66	170	98.5	97.5	1.1	0.34		-14	-3	60	0	-1.25	122	88	8	8	8	8	8	8	8	8	8	8	8	8	8	8	31	2	0	0	0	0	0	0	0	0	0	0	0	0	0
972	2	19501024	0	65	153.5	99	102	0.06	0		1.5	-1.25	81	1	-0.75	122	20	2	0	0	0	0	0	0	0	0	0	0	0	0	0	10	0	0	0	0	0	0	0	0	0	0	0	0	0	0
973	1	19421130	15	67	153.5	103	103	0.1	0.1		0.25	-1	84	-0.25	-1.5	81	31	2	0	0	0	0	0	0	0	0	0	0	0	0	0	63	2	0	0	0	0	0	0	0	0	0	0	7	0	3
975	2	19560812	10	55	153	97	95	1.54	1.3	myopic maculopathy	-15.5	-2	131	-5.75	-0.25	125	10	0	0	0	0	0	0	0	0	0	0	0	0	0	0	10	0	0	0	0	0	0	0	0	0	0	0	0	0	0
977	2	19500912	5	75	154.5	100.5	106	0.02	-0.06		1.25	-1.25	67	1	-0.75	123	10	0	0	0	0	0	0	0	0	0	0	0	0	0	0	12	2	0	0	0	0	0	0	0	0	0	0	0	0	0
978	2	19630814	4	58	158	96	90	0.6	0.34		-3	0	0	-3.25	-0.5	146	31	2	0	0	0	0	0	0	0	0	0	0	0	0	0	20	2	0	0	0	0	0	0	0	0	0	0	0	0	0
979	2	19431107	5	74	151	114	114	1.7	0.1					1	-1.5	101																10	0	0	0	0	0	0	0	0	0	0	0	0	0	0
980	2	19531002	14	48	151	95	94.5	0.16	0.14		2.75	-3	82	2.5	-3.25	91	20	2	0	0	0	0	0	0	0	0	0	0	0	0	0	20	2	0	0	0	0	0	0	0	0	0	0	0	0	0
981	2	19550616	0	75	161	112	113	0.2	0		1.5	-0.25	44	1	-0.75	95	10	0	0	0	0	0	0	0	0	0	0	0	0	0	0	10	0	0	0	0	0	0	0	0	0	0	0	0	0	0
982	2	19640904	2	69.5	157	103	103	1.1	0.6	myopic	-9.75	-1.5	70	-6	-0.5	150	15	2	0	0	0	0	0	0	0	0	0	0	0	0	0	10	0	0	0	0	0	0	0	0	0	0	0	0	0	0
984	1	19471114	4	89.5	176.5	108.5	107	-0.08	-0.2		0.75	-0.5	56	0.75	-0.25	90	10	0	0	0	0	0	0	0	0	0	0	0	0	0	0	10	0	0	0	0	0	0	0	0	0	0	0	0	0	0
985	2	19580226	8	61	151	98.5	96	0.1	0.02		0.75	-1.5	77	0	-0.5	98	31	2	0	0	0	0	0	0	0	0	0	0	0	0	0	20	2	0	0	0	0	0	0	0	0	0	0	0	0	0
986	2	19620526	10	66	162	100	95	0.2	0.18		0.5	-2	18	-0.5	-1.5	19	63	2	2	0	0	0	0	0	0	0	0	3	7	2	3	63	2	2	0	0	0	0	0	0	0	0	0	7	0	0
987	1	19520426	10	63	163.5	98	90.5	-0.06	-0.06		0.25	0.5	157	0.25	0.75	6	10	0	0	0	0	0	0	0	0	0	0	0	0	0	0	10	0	0	0	0	0	0	0	0	0	0	0	0	0	0
988	2	19560515	10	50	148	92	94.5	0.6	0.7	myopic	-3.75	-1	92	-3.5	-1	91	53	6	2	0	0	0	0	0	0	0	0	3	0	2	0	47	4	2	0	2	0	0	0	0	0	0	3	0	2	0
989	2	19530208	4	80	152	116	111	0	0		1.5	-1.25	82	1.75	-1.25	92	10	0	0	0	0	0	0	0	0	0	0	0	0	0	0	20	2	0	0	0	0	0	0	0	0	0	0	0	0	0
990	2	19530620	4	69	158.5	104	106	0.2	0		0.5	-2	92	0.5	-1	88	13	1	0	0	0	0	0	0	0	0	0	0	0	0	0	20	2	0	0	0	0	0	0	0	0	0	0	0	0	0
991	2	19511223	1	52	154	95	93.5	0.1	0.04		1.25	-0.75	3	1	-0.75	3	10	0	0	0	0	0	0	0	0	0	0	0	0	0	0	10	0	0	0	0	0	0	0	0	0	0	0	0	0	0
992	2	19500120	5	64	156	102	100	1.7	0.2		-6.75	-2	91	3.75	-3.5	75	88	8	8	8	8	8	8	8	8	8	8	8	8	8	8	10	0	0	0	0	0	0	0	0	0	0	0	0	0	0
993	2	19620916	14	55	159	93.5	87	0.1	0.16		1	-1	84	1.75	-1.75	92	47	5	0	0	0	0	0	0	0	0	0	0	0	0	0	47	5	0	0	0	0	0	0	0	0	0	0	0	0	0
994	1	19461111	8	77	171	105	107.5	0.46	0.14		1	-0.5	101	1	-1.25	90	53	6	2	0	0	0	0	0	0	0	0	3	0	2	0	47	5	2	0	0	0	0	0	0	0	0	3	0	2	0
995	2	19630223	13	59	155.5	99	102	1.1	1.7	PDR	0	-1.75	102	-2.25	-4	135	85	2	0	0	0	0	0	3	3	3	3	8	7	8	8	88	8	8	8	8	8	8	8	8	8	8	8	8	8	8
996	1	19631020	4	65	165	100	97	0.44	0		-1.25	-0.75	57	0.25	-1	93	20	2	0	0	0	0	0	0	0	0	0	0	0	0	0	20	2	0	0	0	0	0	0	0	0	0	0	0	0	0
997	2	19640315	6	57	162	96.5	97	0.32	0.1		-0.5	-2	95	-0.25	-1.75	97	53	4	2	2	4	0	0	0	0	0	0	0	0	0	0	65	6	2	2	2	0	0	0	2	0	0	2	0	0	0
998	1	19520501	6	68	171	104	102	-0.1	-0.02		0.75	-0.5	71	1.25	-0.5	105	10	0	0	0	0	0	0	0	0	0	0	0	0	0	0	10	0	0	0	0	0	0	0	0	0	0	0	0	0	0
999	2	19701202	7	74	159	106.5	105	0.42	0.12		-1.75	-0.5	98	-1.25	-0.5	83	10	0	0	0	0	0	0	0	0	0	0	0	0	0	0	10	0	0	0	0	0	0	0	0	0	0	0	0	0	0
1000	2	19770501	3	66	156	101	100	-0.08	0		0.25	0	0	0	-0.25	167	15	2	0	0	0	0	0	0	0	0	0	0	0	0	0	15	2	0	0	0	0	0	0	0	0	0	0	0	0	0
1001	1	19540602	3	87	172	113	105	-0.08	-0.08		0	0	0	0	-0.25	48	20	2	0	0	0	0	0	0	0	0	0	0	0	0	0	10	0	0	0	0	0	0	0	0	0	0	0	0	0	0
1002	1	19530509	0	71	167	103	100	0.52	0.64	myopic	-1.5	-0.25	40	-2	-0.25	155	10	0	0	0	0	0	0	0	0	0	0	0	0	0	0	20	2	0	0	0	0	0	0	0	0	0	0	0	0	0
1003	2	19520921	15	64	164	101	93	0.1	0.16		2	-2.25	80	1.75	-1.75	106	37	2	2	0	0	0	0	0	0	0	0	0	0	0	0	37	2	2	0	0	0	0	0	0	0	0	0	0	0	0
1004	2	19451201	2	62	163	102	97.5	0.2	0.2		1.75	-0.25	75	-1.75	-0.5	113	31	2	0	0	0	0	0	0	0	0	0	0	0	0	0	31	2	0	0	0	0	0	0	0	0	0	0	0	0	0
1005	2	19520802	3	59	155	98	91	0.04	-0.06		1.5	-2	93	0.25	-0.25	70	37	2	2	0	1	0	0	0	0	0	0	0	0	0	0	37	2	2	0	0	0	0	0	0	0	0	0	0	0	0
1006	1	19550919	1	95	167.5	117	115	0.3	0.2		2.75	-3.5	155	2	-0.75	40	65	2	2	0	4	0	0	0	3	0	0	3	0	0	0	65	6	2	2	4	0	3	0	3	0	0	3	0	2	0
1007	2	19460205	16	61	150	103	103	0.2	0.02		-0.75	-0.5	79	0.75	-1.25	86	63	2	2	0	0	0	0	0	0	0	0	3	7	2	0	63	2	2	0	0	0	0	0	0	0	0	3	7	2	0
1008	1	19490930	2	65	154	103	95	0.02	0.1		0.5	-0.5	100	1	-1	116	20	2	0	0	0	0	0	0	0	0	0	0	0	0	0	10	0	0	0	0	0	0	0	0	0	0	0	0	0	0
1009	2	19510320	10	67	150	105	108	0.1	0.02		1.75	-0.5	61	1.25	-0.5	106	10	0	0	0	0	0	0	0	0	0	0	0	0	0	0	10	0	0	0	0	0	0	0	0	0	0	0	0	0	0
1010	2	19560902	8	59	157.5	96	100	0.1	0.1		0	-0.75	60	0	-1	105	20	2	0	0	0	0	0	0	0	0	0	0	0	0	0	20	2	0	0	0	0	0	0	0	0	0	0	0	0	0
1011	1	19570903	2	58	173	91	91	0.08	0		1.25	-1.5	92	1	-0.75	75	10	0	0	0	0	0	0	0	0	0	0	0	0	0	0	10	0	0	0	0	0	0	0	0	0	0	0	0	0	0
1012	2	19440101	10	64	151	103	104	0.18	0.08		1	-1.75	82	0.75	-1.25	93	37	2	0	2	0	0	0	0	0	0	0	0	0	0	0	31	2	0	0	0	0	0	0	0	0	0	0	0	0	0
1013	1	19581019	1	74	169	103	98	-0.1	-0.16		0.75	-0.25	142	0.75	-0.25	53	20	2	0	0	0	0	0	0	0	0	0	0	0	0	0	20	2	0	0	0	0	0	0	0	0	0	0	0	0	0
1014	2	19361106	5	51	152	96	95	1.1	1.1	cataract	-4.25	-1.75	99	-2.25	-1.75	87	88	8	8	8	8	8	8	8	8	8	8	8	8	8	8	88	8	8	8	8	8	8	8	8	8	8	8	8	8	8
1015	1	19580923	0	63	155	100	99	-0.08	-0.02		1.5	-0.75	91	0.5	0	0	37	2	0	2	0	0	0	0	0	0	0	0	0	0	0	47	4	2	2	2	0	0	0	0	0	0	0	0	0	0
1016	1	19471122	1	78	168	106	105	0	0.1		0.25	-0.5	80	0.5	-0.75	92	20	2	0	0	0	0	0	0	0	0	0	0	0	0	0	10	0	0	0	0	0	0	0	0	0	0	0	0	0	0
1017	1	19631005	10	90	179.5	111	109	0.48	0.42		-1.75	-1.25	90	-1.25	-1	95	37	2	2	0	0	0	0	0	0	0	0	0	0	0	0	37	2	2	0	0	0	0	0	0	0	0	0	0	0	0
1018	2	19470302	12	77	159	113	119	1.7	0		-22	-4	82	1.25	-1.25	86	20	2	0	0	0	0	0	0	0	0	0	0	2	0	0	20	2	0	0	0	0	0	0	0	0	0	0	0	0	0
1019	2	19501021	19	72	163	105.5	103	0.08	0.16		0	-0.25	94	1.5	-1.75	87	20	2	0	0	0	0	0	0	0	0	0	0	0	0	0	13	1	0	0	0	0	0	0	0	0	0	0	0	0	0
1020	1	19710412	3	69	160.5	105	99	0	0.22		-1	0	0	-1	-1	107	20	2	0	0	0	0	0	0	0	0	0	0	0	0	0	20	2	0	0	0	0	0	0	0	0	0	0	0	0	0
1021	1	19540901	15	77	170	103	96	0.1	0		1	-0.5	85	1.25	-0.75	98	37	2	2	2	0	0	0	0	0	0	0	0	0	0	0	37	2	0	2	0	0	0	0	0	0	0	0	0	0	0
1022	2	19360401	5	72	150	108	113	0.4	0.4		1.5	-2.25	76	0.75	-2.25	140	20	2	0	0	0	0	0	0	0	0	0	0	0	0	0	10	0	0	0	0	0	0	0	0	0	0	0	0	0	0
1023	2	19590320	2	69	168.5	101	102.5	0.2	0.22		0.75	-1.25	88	0.75	-1.25	88	10	0	0	0	0	0	0	0	0	0	0	0	0	0	0	10	0	0	0	0	0	0	0	0	0	0	0	0	0	0
1024	1	19450608	10	71	164	102	105	1.1	0.08		-3.5	-2	85	0.5	-0.75	106	88	8	8	8	8	8	8	8	8	8	8	8	8	8	8	10	0	0	0	0	0	0	0	0	0	0	0	0	0	0
1025	1	19580420	1	80	183	107.5	107	0.46	0.1		0.5	-2.25	84	0	-0.5	66	10	0	0	0	0	0	0	0	0	0	0	0	0	0	0	10	0	0	0	0	0	0	0	0	0	0	0	0	0	0
1026	1	19541203	1	90	172.5	111	102.5	0	0.2		0.5	0.25	59	0.25	1.5	95	20	2	0	0	0	0	0	0	0	0	0	0	0	0	0	10	0	0	0	0	0	0	0	0	0	0	0	0	0	0
1027	2	19451113	6	84	151	115	119	0.1	0.22		2	-1.75	89	1.75	-0.75	80	20	2	0	0	0	0	0	0	0	0	0	0	0	0	0	20	2	0	0	0	0	0	0	0	0	0	0	0	0	0
1028	1	19490727	8	75	173	103	85	0.7	0.36		0.5	-3.75	90	-0.75	-3.5	84	10	0	0	0	0	0	0	0	0	0	0	0	0	0	0	13	1	0	0	0	0	0	0	0	0	0	0	0	0	0
1029	1	19470703	1	91	165	114	115	0.1	0.1		1.25	-1	95	1	-1.25	87	15	2	0	0	0	0	0	0	0	0	0	0	0	0	0	20	2	0	0	0	0	0	0	0	0	0	7	0	0	0
1030	2	19470628	9	51	159	95	95	0.4	0.2		0.75	-2	81	1	-1.75	100	20	2	0	0	0	0	0	0	0	0	0	0	0	0	0	10	0	0	0	0	0	0	0	0	0	0	0	0	0	0
1031	2	19540422	11	75	156	108	102	0.22	0.22		-0.5	-2.5	81	-1.25	-1.5	93	31	2	0	0	0	0	0	0	0	0	0	0	0	0	0	20	2	0	0	0	0	0	0	0	0	0	0	0	0	0
1032	2	19520720	10	48	156	92	87.5	0.06	0.04		0.75	0	0	0.75	0	0	10	0	0	0	0	0	0	0	0	0	0	0	0	0	0	10	0	0	0	0	0	0	0	0	0	0	0	0	0	0
1033	2	19350618	12	59	160	99	97	0.44	0.24		3	0.75	160	0.5	0.25	1	20	2	0	0	0	0	0	0	0	0	0	0	0	0	0	88	8	8	8	8	8	8	8	8	8	8	8	8	8	8
1034	1	19420327	12	72	170	102	91	0.44	0.38		1.75	-2.5	81	2	-2.5	100	31	2	0	0	0	0	0	0	0	0	0	0	0	0	0	31	2	1	0	0	0	0	0	0	0	0	0	0	0	0
1035	1	19630603	10	88	175.5	110	109	1.1	1.1	myopic	-2.25	-2.25	91	-2.75	-1.75	91	43	2	2	0	2	0	0	0	0	0	0	0	0	0	0	43	2	2	0	2	0	0	0	0	0	0	2	0	0	0
1036	1	19660522	4	72	165	103	97	-0.1	-0.08		-0.25	0	0	-0.75	-0.25	101	10	0	0	0	0	0	0	0	0	0	0	0	0	0	0	10	0	0	0	0	0	0	0	0	0	0	0	0	0	0
1037	1	19580528	5	80	166	103	101	1.16	0.32		-5.25	-3	102	0.5	-1.75	98	20	2	0	0	0	0	0	0	0	0	0	0	0	0	0	10	0	0	0	0	0	0	0	0	0	0	0	0	0	0
1038	1	19530203	2	66.5	161	100	96	-0.08	0		0.5	1	8	0.25	0.5	164	88	8	8	8	8	8	8	8	8	8	8	8	8	8	8	10	0	0	0	0	0	0	0	0	0	0	0	0	0	0
1039	1	19571113	5	58.5	160.5	98	93	0.02	0.18		0.75	-1	84	0	-0.25	110	20	2	0	0	0	0	0	0	0	0	0	0	0	0	0	20	2	0	0	0	0	0	0	0	0	0	0	0	0	0
1040	2	19491221	1	69.5	155.5	107	106	0.44	0.4		-1	-1.25	74	-0.75	-0.75	109	10	0	0	0	0	0	0	0	0	0	0	0	0	0	0	10	0	0	0	0	0	0	0	0	0	0	0	0	0	0
1041	1	19640424	12	90	175	110	105	-0.02	0.22		0.25	-0.75	180	0	1.25	4	37	2	0	2	1	0	0	0	0	0	0	0	0	0	0	37	2	2	0	0	0	0	0	0	0	0	0	0	0	0
1042	1	19740501	2	99	175	104	102.5	0.02	-0.08		0	0.75	8	0.5	-0.75	81	10	0	0	0	0	0	0	0	0	0	0	0	0	0	0	20	2	0	0	0	0	0	0	0	0	0	0	0	0	0
1043	2	19400209	1	73	159	113	99	0.1	0.5		-1	-0.5	79	-2.75	-0.75	83	20	2	0	0	0	0	0	0	0	0	0	0	0	0	0	13	0	1	0	0	0	0	0	0	0	0	0	0	0	0
1044	1	19540213	11	75	165	104	100	-0.04	0.16		0	-1	85	0	-1	97	31	2	0	0	0	0	0	0	0	0	0	0	0	0	0	31	2	0	0	0	0	0	0	0	0	0	0	0	0	0
1045	1	19490609	3	88	170	112.5	112	-0.08	-0.08		0.5	-0.25	95	1	-0.75	78	20	2	0	0	0	0	0	0	0	0	0	0	0	0	0	10	0	0	0	0	0	0	0	0	0	0	0	0	0	0
1046	2	19500807	5	57	154.5	94.5	93	0.04	0.04		0.75	0.25	174	0.25	0.25	18	20	2	0	0	0	0	0	0	0	0	0	0	0	0	0	10	0	0	0	0	0	0	0	0	0	0	0	0	0	0
1047	1	19670831	1	83	173	106	102	0.08	-0.06		0	0.75	168	0.75	-1	93	20	2	0	0	0	0	0	0	0	0	0	0	0	0	0	31	2	0	0	0	0	0	0	0	0	0	0	0	0	0
1048	2	19560730	2	69	164.5	105	102	1.1	1.1	myopic	-2.75	-1	105	-2.75	-0.5	60	10	0	0	0	0	0	0	0	0	0	0	0	0	0	0	10	0	0	0	0	0	0	0	0	0	0	0	0	0	0
1049	2	19430916	21	70	158.5	107	104.5	0.22	0.12		0.75	-2.5	77	1.25	-2.5	101	43	4	2	0	0	0	0	0	0	0	0	0	0	0	0	43	4	2	0	0	0	0	0	0	0	0	0	0	0	0
1050	1	19560306	0	67	157	97	95	0.04	0.1		1	-1.5	92	1.25	-1.75	86	10	0	0	0	0	0	0	0	0	0	0	0	0	0	0	14	0	0	0	0	0	2	0	0	0	0	0	0	0	0
1051	2	19560418	4	54	154	88.5	93.5	0.1	0.24		0.5	-1.25	79	0.25	-0.75	89	10	0	0	0	0	0	0	0	0	0	0	0	0	0	0	10	0	0	0	0	0	0	0	0	0	0	0	0	0	0
1052	1	19650216	4	86.5	167.5	110	103	0.18	0.1		-1	0	0	0	-1.25	100	20	2	0	0	0	0	0	0	0	0	0	0	0	0	0	20	2	0	0	0	0	0	0	0	0	0	0	0	0	0
1053	2	19370323	21	47	151	92	94	1.7	0.66	cataract	0.5	2.75	171	0.5	2.75	170																85	2	0	0	0	0	0	0	0	2	0	8	0	8	0
1054	1	19541214	3	63	162	103	88	0	-0.1		0.25	0.25	158	0.5	0	0	10	0	0	0	0	0	0	0	0	0	0	0	0	0	0	10	0	0	0	0	0	0	0	0	0	0	0	0	0	0
1055	1	19540318	15	44	160	93	89.5	0.2	0.2		0.25	-1.25	86	0.5	-1.75	72	37	2	0	2	0	0	0	0	0	0	0	0	0	0	0	37	2	0	2	0	0	0	0	0	0	0	0	0	0	0
1056	2	19450703	16	66	156	103	99	0.1	1.1		-0.25	-0.25	44	-3.5	0	0	10	0	0	0	0	0	0	0	0	0	0	0	0	0	0	88	8	8	8	8	8	8	8	8	8	8	8	8	8	8
1057	2	19480719	6	51.5	150.5	92	96	0.32	0.64		-0.75	-0.5	145	-0.5	-0.75	92	63	2	2	0	0	0	0	0	0	0	0	3	3	2	3	63	2	2	0	0	0	0	0	0	0	0	3	3	2	0
1058	1	19630213	6	94	170	113	106	-0.1	0.1		1	0.25	155	1	0.25	20	10	0	0	0	0	0	0	0	0	0	0	0	0	0	0	20	2	0	0	0	0	0	0	0	0	0	0	0	0	0
1059	2	19581208	13	63	156	100	93	0.2	0		1	0.5	139	0.5	0.5	17	10	0	0	0	0	0	0	0	0	0	0	0	0	0	0	10	0	0	0	0	0	0	0	0	0	0	0	0	0	0
1061	1	19481026	1	64	165.5	105	93	0.6	0.6	myopic	-2.5	0.75	89	-4	1	83	15	2	0	0	0	0	0	0	0	0	0	0	0	0	0	15	2	0	0	0	0	0	0	0	0	0	0	0	0	0
1062	2	19631024	3	58	164	95.5	91	0.1	0		-0.75	0.75	5	-0.5	0.75	3	20	2	0	0	0	0	0	0	0	0	0	0	0	0	0	10	0	0	0	0	0	0	0	0	0	0	0	0	0	0
1063	2	19481102	1	68	157	98	97	0.52	0.06		0.75	4	159	1.25	0.25	176	10	0	0	0	0	0	0	0	0	0	0	0	0	0	0	15	2	0	0	0	0	0	0	0	0	0	0	0	0	0
1064	1	19510408	28	83	173.5	111	109	0.6	1.24	myopic	-1.5	1.25	11	-7.25	0.25	17	64	2	0	0	4	2	0	0	0	0	0	3	7	2	3	63	2	0	0	0	0	0	0	0	0	0	3	3	2	3
1065	1	19690916	4	86	171.5	107	106	0.2	0.3		-0.25	-0.25	172	-0.5	0	0	20	2	0	0	0	0	0	0	0	0	0	0	0	0	0	20	2	0	0	0	0	0	0	0	0	0	0	0	0	0
1066	1	19391101	2	74	173	104	98	0.02	-0.08		0	1.5	8	0	1.25	1	20	2	0	1	0	0	0	0	0	0	0	0	0	0	0	10	0	0	0	0	0	0	0	0	0	0	0	0	0	0
1067	1	19600208	6	65	161	97	94	0.3	0.2		-0.25	-1.25	4	0	-0.5	83	37	2	2	2	0	0	0	0	0	0	0	0	0	0	0	37	2	1	2	0	0	0	0	0	0	0	0	0	0	0
1068	1	19510721	8	66	166.5	99	91.5	-0.04	-0.1		0	0.25	163	0.25	0.5	22	37	2	2	0	0	0	0	0	0	0	0	3	0	2	0	20	2	0	0	0	0	0	0	0	0	0	0	0	0	0
1069	2	19450907	3	74	163	105.5	109	0.24	0.2		1	2.5	173	1	2.25	172	15	2	0	0	0	0	0	0	0	0	0	0	0	0	0	88	8	8	8	8	8	8	8	8	8	8	8	8	8	8
1070	2	19290619	12	59	149	100	104	0.36	0.24		1.25	1	26	1	1	161	37	2	2	0	0	0	0	0	0	0	0	0	0	0	0	15	2	8	8	8	8	8	8	8	8	8	8	0	8	8
1071	1	19590330	4	79	163.5	105	102	-0.1	-0.1		0.5	-0.5	176	0.5	-0.25	167	10	0	0	0	0	0	0	0	0	0	0	0	0	0	0	10	0	0	0	0	0	0	0	0	0	0	0	0	0	0
1072	2	19670704	3	62	167	92	88	0.06	-0.08		-0.75	1	172	-0.5	0.5	10	10	0	0	0	0	0	0	0	0	0	0	0	0	0	0	10	0	0	0	0	0	0	0	0	0	0	0	0	0	0
1073	2	19540502	5	60	158	103	91	-0.1	0.2		0.25	0	0	-1	-1.25	73	10	0	0	0	0	0	0	0	0	0	0	0	0	0	0	10	0	0	0	0	0	0	0	0	0	0	0	0	0	0
1074	2	19640317	2	60	157	101	95	-0.02	0.04		0.25	0.5	156	0	1	24	20	2	0	0	0	0	0	0	0	0	0	0	0	0	0	20	2	0	0	0	0	0	0	0	0	0	0	0	0	0
1076	2	19391123	2	62	158.5	105	93	0.3	0.1		1	0.5	25	1	1	179	47	5	2	2	0	0	0	0	0	0	0	3	0	2	0	53	6	2	2	1	0	2	0	0	0	0	2	0	0	0
1077	1	19551021	8	78	168	112	110	0.1	0		0.75	0.5	164	0.75	0	0	37	2	2	0	0	0	0	0	0	0	0	0	0	0	0	37	2	2	0	0	0	0	0	0	0	0	0	0	0	0
1078	2	19570331	0	64	162	101.5	98	-0.08	-0.1		0.5	0.25	166	0.25	0.5	19	10	0	0	0	0	0	0	0	0	0	0	0	0	0	0	10	0	0	0	0	0	0	0	0	0	0	0	0	0	0
1079	1	19520724	14	66.5	161	97	93.5	0.1	0.1		0	-0.25	55	0.75	-1.5	100	53	6	2	0	0	0	0	0	0	0	0	3	0	2	0	63	6	2	0	0	0	0	0	0	0	0	3	0	2	0
1080	1	19440827	14	67	166	101	94	0.38	1.22		0	-1.5	95	-6	-0.25	113	53	6	2	0	0	0	0	0	0	0	0	3	0	2	0	47	5	2	0	0	0	0	0	0	0	0	3	0	2	0
1081	1	19450401	3	66	167.5	98.5	95	0.3	0.1		1.25	1.5	178	0.5	1.5	159	53	6	2	2	0	0	0	0	0	0	0	3	0	2	0	53	6	0	2	0	0	0	0	0	0	0	3	0	2	0
1082	2	19600329	9	69.5	162.5	97.5	97	0.1	0.1		1	1.25	123	1.25	0.5	44	10	0	0	0	0	0	0	0	0	0	0	0	0	0	0	20	2	0	0	0	0	0	0	0	0	0	0	0	0	0
1083	1	19460224	8	71	170.5	100	95	0.64	0.36		2.5	0.5	18	2.25	0.25	165	20	2	0	0	0	0	0	0	0	0	0	0	0	0	0	20	2	0	0	0	0	0	0	0	0	0	0	0	0	0
1084	2	19440319	5	70	161	110	109	0.1	0		0.5	1.5	171	0.5	0.5	171	13	1	0	0	0	0	0	0	0	0	0	0	0	0	0	15	2	0	0	0	0	0	0	0	0	0	0	0	0	0
1085	1	19411003	10	71.5	167.5	107.5	106	0.1	0.08		1	0.5	149	1	0.5	12	88	8	8	8	8	8	8	8	8	8	8	8	8	8	8	15	2	0	0	0	0	0	0	0	0	0	0	0	0	0
1086	2	19540317	3	64	161	96	92	0.06	0.04		0.75	-1	90	0.25	-0.75	89	20	2	0	0	0	0	0	0	0	0	0	0	0	0	0	20	2	0	0	0	0	0	0	0	0	0	0	0	0	0
1087	2	19490707	0	75	163	111	101	1.1	1.4	myopic	-11.25	-2.5	89	-14.5	-1.5	84	31	2	0	0	0	0	0	0	0	0	0	0	0	0	0	15	2	0	0	0	0	0	0	0	0	0	0	0	0	0
1088	2	19510129	2	67	157	104.5	104.5	0.04	0.1		1	-1.25	79	0.5	-0.75	87	10	0	0	0	0	0	0	0	0	0	0	0	0	0	0	20	2	0	0	0	0	0	0	0	0	0	0	0	0	0
1089	1	19640202	2	68	169.5	103	87	0.38	0.04		0.25	0.5	151	-0.5	-0.5	86	10	0	0	0	0	0	0	0	0	0	0	0	0	0	0	10	0	0	0	0	0	0	0	0	0	0	0	0	0	0
1090	1	19411115	3	65	160	107	105	0.62	0.6	myopic	2	0	0	1.25	0.75	177	10	0	0	0	0	0	0	0	0	0	0	0	0	0	0	20	2	0	0	0	0	0	0	0	0	0	0	0	0	0
1091	1	19620823	6	90	173	114	107	0.42	-0.1		1.25	-2	78	0	0.75	1	20	2	0	0	0	0	0	0	0	0	0	0	0	0	0	20	2	0	0	0	0	0	0	0	0	0	0	0	0	0
1092	2	19470402	7	63	152	108	102	0.42	0.4		1.25	1.25	160	1.5	1	21	10	0	0	0	0	0	0	0	0	0	0	0	0	0	0	10	0	0	0	0	0	0	0	0	0	0	0	0	0	0
1093	2	19631203	0	63	143.5	103	101	0.18	0.2		-0.5	-0.75	60	-0.25	-0.75	110	20	2	0	0	0	0	0	0	0	0	0	0	0	0	0	31	2	0	0	0	0	0	0	0	0	0	0	0	0	0
1094	2	19630728	7	54	152	101	95	0.2	0.7		-1.5	-1	134	-4	-1	40	37	2	2	2	0	0	0	0	0	0	0	1	0	0	0	37	2	2	2	0	0	0	0	0	0	0	3	0	2	0
1095	2	19650325	18	74	155.5	110.5	106	0.7	0.44		-3.25	-1.5	121	-1	-1	88	10	0	0	0	0	0	0	0	0	0	0	0	0	0	0	10	0	0	0	0	0	0	0	0	0	0	0	0	0	0
1096	1	19511218	20	84	171	106	102	0.04	0.1		0.25	-0.75	83	0	1.75	5	20	2	0	0	0	0	0	0	0	0	0	0	0	0	0	10	0	0	0	0	0	0	0	0	0	0	0	0	0	0
1097	1	19510720	5	64	159.5	98.5	93	0.66	0.62	PDR	0.5	-2.75	85	2	-2.25	85	75	2	0	0	0	0	0	3	3	4	2	8	0	8	0	71	2	2	0	0	0	0	3	3	4	0	8	0	8	0
1098	2	19360102	7	59.5	157	100	104	0.6	0.6	myopic	-0.5	-3.5	91	0.5	-4.5	96	10	0	0	0	0	0	0	0	0	0	0	0	0	0	0	31	2	0	0	0	0	0	0	0	0	0	0	0	0	0
1099	1	19331028	1	77	165	107	107	0.02	0.14		1	-1.5	83	0.75	0.75	174	88	8	8	8	8	8	8	8	8	8	8	8	8	8	8	88	8	8	8	8	8	8	8	8	8	8	8	8	8	8
1100	1	19590927	7	83	183	105.5	106	0.24	0.1		-0.25	-1	103	-0.5	-1	84	31	2	0	0	0	0	0	0	0	0	0	0	0	0	0	37	2	0	2	0	0	0	0	0	0	0	0	0	0	0
1101	2	19461127	5	52.5	148.5	103	84	1.5	0.3		2.5	0	0	-0.5	-0.5	96	88	8	8	8	8	8	8	8	8	8	8	8	8	8	8	10	0	0	0	0	0	0	0	0	0	0	0	0	0	0
1102	1	19480506	5	72	159	104	99	0.7	0.42		-3.5	-1	98	-0.75	-2.25	86	88	8	8	8	8	8	8	8	8	8	8	8	8	8	8	20	2	0	0	0	0	0	0	0	0	0	0	0	0	0
1103	2	19450226	8	74	161.5	106	102	0.1	0.06		0.5	-1.25	75	0	-1.25	94	10	0	0	0	0	0	0	0	0	0	0	0	0	0	0	10	0	0	0	0	0	0	0	0	0	0	0	0	0	0
1104	1	19580822	3	62	163.5	97.5	97	0.14	0.1		0	0.75	168	0.25	-0.75	96	37	2	2	2	0	0	0	0	0	0	0	0	0	0	0	37	2	2	0	0	0	0	0	0	0	0	2	0	0	0
1105	1	19700206	15	86	179	105.5	103	1.1	1.1	myopic	-8	-1	8	-9.5	-0.25	153	10	0	0	0	0	0	0	0	0	0	0	0	0	0	0	20	2	0	0	0	0	0	0	0	0	0	0	0	0	0
1106	1	19631213	9	58	161.5	94	94	0	0		0.25	-0.5	84	0	1	180	20	2	0	0	0	0	0	0	0	0	0	0	0	0	0	37	2	2	0	0	0	0	0	0	0	0	0	0	0	0
1107	2	19590104	1	61	155.5	102	84	0.04	0.12		-0.25	-1	76	-0.25	-1.25	97	10	0	0	0	0	0	0	0	0	0	0	0	0	0	0	10	0	0	0	0	0	0	0	0	0	0	0	0	0	0
1108	2	19560519	1	65	165	100	97	-0.06	-0.04		0.25	-1	78	0.25	-0.75	80	10	0	0	0	0	0	0	0	0	0	0	0	0	0	0	10	0	0	0	0	0	0	0	0	0	0	0	0	0	0
1109	2	19690626	6	55	163	94	90	0.14	0.02		0.25	-1.75	161	0	-1.25	27	31	2	0	0	0	0	0	0	0	0	0	0	0	0	0	13	1	0	0	0	0	0	0	0	0	0	0	0	0	0
1110	2	19640204	14	60	162	97	88	0	0		1.25	0	0	1.25	0.25	5	14	0	0	2	0	0	0	0	0	0	0	0	0	0	0	14	0	0	2	0	0	0	0	0	0	0	0	0	0	0
1111	2	19491101	5	70	150.5	109	109	0.6	0.3		1.5	3	105	1.75	0.5	60	20	2	0	0	0	0	0	0	0	0	0	0	0	0	0	37	2	2	0	0	0	0	0	0	0	0	0	0	0	0
1112	2	19550512	20	88	169	111.5	112.5	0.1	0		0	-1	66	-0.25	-0.75	94	65	3	2	0	0	0	0	0	3	0	0	3	0	2	0	43	3	2	0	0	0	0	0	0	0	0	2	0	0	0
1113	2	19520820	8	77	161	106	110	0.14	0		0.25	1.5	173	0.5	1	3	20	2	0	0	0	0	0	0	0	0	0	0	0	0	0	10	0	0	0	0	0	0	0	0	0	0	0	0	0	0
1114	2	19450415	5	51	143.5	95	96	1.48	0.48		5	1.5	164	5.25	1	14	37	2	2	0	0	0	0	0	0	0	0	1	0	0	0	37	2	2	0	0	0	0	0	0	0	0	0	0	0	0
1115	2	19620627	19	60	155.5	95.5	95	-0.08	0.1		0	0.5	176	-0.25	-0.25	78	37	2	2	0	0	0	0	0	0	0	0	0	0	0	0	37	2	2	0	0	0	0	0	0	0	0	0	0	0	0
1116	2	19420429	12	57	161	99	95	0.1	0.62		1	-1.5	91	-2	-1.5	75	10	0	0	0	0	0	0	0	0	0	0	0	0	0	0	88	8	8	8	8	8	8	8	8	8	8	8	8	8	8
1117	2	19431012	12	68	155	105	106	1.7	1.7	myopic maculopathy	-18.75	-1.5	64	-17	-1.5	172	63	2	0	0	0	0	0	0	0	0	0	0	7	0	0	61	0	0	0	0	0	0	0	0	0	0	0	7	0	0
1118	1	19460427	3	64	169.5	100	98	0.1	0.64		-0.5	-0.75	105	-8	-1.25	36	31	2	0	0	0	0	0	0	0	0	0	0	0	0	0	88	8	8	8	8	8	8	8	8	8	8	8	8	8	8
1119	1	19531021	7	70	161	107	105	0.48	0.6		-0.25	-2	80	-1.25	-1	113	37	2	2	2	0	0	0	0	0	0	0	0	0	0	0	37	2	2	2	0	0	1	0	0	0	0	0	0	0	0
1120	2	19561005	10	74	162.5	105.5	99	1.14	0.6	myopic	-9.5	-0.75	167	-3.25	-0.5	116	31	2	0	0	0	0	0	0	0	0	0	0	0	0	0	20	2	0	0	0	0	0	0	0	0	0	0	0	0	0
1121	1	19700814	10	88	171	108	107	-0.1	-0.1		0.5	0	0	0	0	0	37	2	0	2	0	0	0	0	0	0	0	0	0	0	0	20	2	0	0	0	0	0	0	0	0	0	0	0	0	0
1122	2	19641122	1	67	160.5	101	97	0.5	0.3		-2.5	-0.25	67	-2	0	0	20	2	0	0	0	0	0	0	0	0	0	0	0	0	0	15	2	0	0	0	0	0	0	0	0	0	0	0	0	0
1123	2	19650415	3	50	156	92.5	88	0	1.16		0.25	0.25	14	-10.5	-3	123	10	0	0	0	0	0	0	0	0	0	0	0	0	0	0	10	0	0	0	0	0	0	0	0	0	0	0	0	0	0
1124	2	19550420	3	67	158.5	106	87	0	0		0.5	0	0	0.25	0.25	151	10	0	0	0	0	0	0	0	0	0	0	0	0	0	0	15	2	0	0	0	0	0	0	0	0	0	0	0	0	0
1125	2	19440209	1	62	150.5	99	98	0.1	0.06		0	-0.5	134	0	-0.5	11	20	2	0	0	0	0	0	1	0	0	0	0	0	0	0	10	0	0	0	0	0	0	0	0	0	0	0	0	0	0
1126	1	19591205	6	87.5	176.5	112	107	-0.04	0		0	0.5	6	0	0.5	170	10	0	0	0	0	0	0	0	0	0	0	0	0	0	0	10	0	0	0	0	0	0	0	0	0	0	0	0	0	0
1127	1	19450207	16	85	171.5	117	111	0.1	0		0.5	-0.75	87	0	0	0	20	2	0	0	0	0	0	0	0	0	0	0	0	0	0	10	0	0	0	0	0	0	0	0	0	0	0	0	0	0
1128	1	19590113	12	84	174	103	106	0.24	0.1		-0.25	-0.25	74	-0.25	0	0	10	0	0	0	0	0	0	0	0	0	0	0	0	0	0	10	0	0	0	0	0	0	0	0	0	0	0	0	0	0
1129	1	19400421	30	65	164	104	100	0.1	0.04		0.5	1	6	0.25	0.75	170	20	2	0	0	0	0	0	0	0	0	0	0	0	0	0	37	2	2	0	0	0	0	0	0	0	0	0	0	0	0
1130	2	19440328	25	61	153	105	97	0.04	0.1		1	0.5	167	0.25	1	23	88	8	8	8	8	8	8	8	8	8	8	8	8	8	8	88	8	8	8	8	8	8	8	8	8	8	8	8	8	8
1131	1	19490913	6	78.5	168.5	112	104	0.7	0.42		0.25	-2.25	91	0.5	-2.5	100	20	2	0	0	0	0	0	0	0	0	0	0	0	0	0	10	0	0	0	0	0	0	0	0	0	0	8	0	8	0
1132	2	19510226	5	60	155	108	103	0.1	0.04		0	0.5	169	0.5	-1	95	20	2	0	0	0	0	0	0	0	0	0	0	0	0	0	20	2	0	0	0	0	0	0	0	0	0	0	0	0	0
1133	2	19390820	1	78	151	109	112	0.04	0		0	0	0	0.25	0.5	175	20	2	0	0	0	0	0	0	0	0	0	0	0	0	0	10	0	0	0	0	0	0	0	0	0	0	0	0	0	0
1134	2	19630310	12	60	160	95	94.5	0.2	0.2		1	1.25	168	0.75	1.5	11	10	0	0	0	0	0	0	0	0	0	0	0	0	0	0	10	0	0	0	0	0	0	0	0	0	0	0	0	0	0
1135	1	19470917	15	56	166	96	86	0.34	0.36		1.25	1.25	163	1.25	0.75	19	10	0	0	0	0	0	0	0	0	0	0	0	0	0	0	10	0	0	0	0	0	0	0	0	0	0	0	0	0	0
1136	1	19490922	3	74	170	100	94	0.06	0.02		1	0.75	164	0.5	1	175	10	0	0	0	0	0	0	0	0	0	0	0	0	0	0	10	0	0	0	0	0	0	0	0	0	0	0	0	0	0
1137	2	19620902	1	67	162	104.5	93	0.14	0.18		-0.75	-1.5	81	-0.75	-1.25	85	20	2	0	0	0	0	0	0	0	0	0	0	0	0	0	20	2	0	0	0	0	0	0	0	0	0	0	0	0	0
1138	2	19480521	17	72	150	113	107	0.02	0		1	0.25	12	0.25	0.25	172	10	0	0	0	0	0	0	0	0	0	0	0	0	0	0	31	2	0	0	0	0	0	0	0	0	0	0	0	0	0
1139	2	19570814	6	57	150	94.5	99	-0.08	-0.02		0.25	0.75	174	0.5	0.25	164	10	0	0	0	0	0	0	0	0	0	0	0	0	0	0	20	2	0	0	0	0	0	0	0	0	0	0	0	0	0
1140	2	19370813	7	63.5	159	117	100	0.48	0.64		0	3.5	178	2.5	-3	93	10	0	0	0	0	0	0	0	0	0	0	0	0	0	0	10	0	0	0	0	0	0	0	0	0	0	0	0	0	0
1141	2	19481013	15	78	163	110	111	0.2	0.54		0	0.5	163	0.25	-1.25	179	10	0	0	0	0	0	0	0	0	0	0	0	0	0	0	10	0	0	0	0	0	0	0	0	0	0	0	0	0	0
1142	1	19481114	10	80	167	106	103	0.16	0.02		1	0.25	142	0.75	0.25	34	10	0	0	0	0	0	0	0	0	0	0	0	0	0	0	20	2	0	0	0	0	0	0	0	0	0	0	0	0	0
1143	2	19500319	5	60	160.5	95.5	90	0.1	0.4		1.25	-1.5	80	1.25	-2.5	94	20	2	0	0	0	0	0	0	0	0	0	0	0	0	0	88	8	8	8	8	8	8	8	8	8	8	8	8	8	8
1144	1	19660217	1	77	168	98.5	99	0	0.1		0.25	-0.75	86	0.25	-1.25	94	53	6	2	2	0	0	0	0	0	0	0	3	0	0	0	53	6	2	2	1	0	0	0	0	0	0	2	0	0	0
1145	1	19561108	4	69	162	98	96	0.12	0.12		0	-1.25	78	-0.75	-0.5	95	10	0	0	0	0	0	0	0	0	0	0	0	0	0	0	10	0	0	0	0	0	0	0	0	0	0	0	0	0	0
1146	2	19680927	1	52	157.5	93	88	0.48	0.52		-2.25	-1.25	77	-3	-0.75	143	10	0	0	0	0	0	0	0	0	0	0	0	0	0	0	15	2	0	0	0	0	0	0	0	0	0	0	0	0	0
1147	1	19561124	1	88.5	166.5	108	103	0.22	0.2		-1	-2	71	0.25	3.5	169	20	2	0	0	0	0	0	0	0	0	0	0	0	0	0
1148	2	19630402	12	58	158.5	92	87	0.04	0.1		0	0.5	97	0.25	0.5	83	37	2	0	2	0	0	0	0	0	0	0	0	0	0	0	20	2	0	0	0	0	0	0	0	0	0	0	0	0	0
1149	1	19550115	2	57	163	94	89	0.26	0.5		0.75	-1.5	83	1	-2	82	47	2	2	2	0	0	0	0	0	0	0	1	0	0	0	43	3	2	0	0	0	0	0	0	0	0	2	0	0	0
1150	1	19400706	6	75	165	111.5	108	0.04	0.06		1	0.75	174	0.75	1	177	20	2	0	0	0	0	0	0	0	0	0	0	0	0	0	31	2	0	0	0	0	0	0	0	0	0	0	0	0	0
1151	1	19330512	2	64	159	107	84	0.7	0.7	cataract	-3.25	-1	96	-2.75	-2.25	71	88	8	8	8	8	8	8	8	8	8	8	8	8	8	8	88	8	8	8	8	8	8	8	8	8	8	8	8	8	8
1152	1	19620917	2	67	157	103	97	0.4	0.4		0.25	-0.75	49	0	-0.5	144	37	2	2	2	0	0	0	0	0	0	0	0	0	0	0	37	2	2	1	0	0	0	0	0	0	0	0	0	0	0
1153	1	19630501	2	81	167	111	104	-0.1	0		0.5	0.25	81	0.75	-1	177	14	0	0	2	0	0	0	0	0	0	0	0	0	0	0	37	2	2	0	0	0	0	0	0	0	0	0	0	0	0
1154	2	19460729	20	68	157.5	107	103	0.24	0.18		0.5	0.75	168	0	1	20	10	0	0	0	0	0	0	0	0	0	0	0	0	0	0	15	2	0	0	0	0	0	0	0	0	0	0	0	0	0
1155	2	19411219	13	52	150	90	94	0.16	0.2		1.25	-2	86	1	-1.5	82	31	2	0	0	0	0	0	0	0	0	0	0	0	0	0	31	2	0	0	0	0	0	0	0	0	0	0	0	0	0
1156	1	19530201	11	80	170.5	105	110	-0.08	-0.1		0	0.5	123	0.25	0.25	5	10	0	0	0	0	0	0	0	0	0	0	0	0	0	0	10	0	0	0	0	0	0	0	0	0	0	0	0	0	0
1157	1	19561203	1	82	171	110	93	0.44	0.22		0	-3.25	95	0.75	-2.75	81	37	2	0	2	0	0	0	0	0	0	0	0	0	0	0	37	2	2	0	0	0	0	0	0	0	0	0	0	0	0
1158	2	19620112	2	50	148	96	90	1.1	1.7	myopic maculopathy	-15	-2.5	143	-16.75	-2.5	35	20	2	0	0	0	0	0	0	0	0	0	0	0	0	0	10	0	0	0	0	0	0	0	0	0	0	0	0	0	0
1159	2	19330410	3	64	156	108	109	0.7	0.68	myopic	-3.75	-2	121	-0.5	-2.75	77	88	8	8	8	8	8	8	8	8	8	8	8	8	8	8	10	0	0	0	0	0	0	0	0	0	0	0	0	0	0
1160	1	19331211	3	57	153	98	91	0.22	1.1		-1	-3	158	-6.5	-0.5	113	31	2	0	0	0	0	0	0	0	0	0	0	0	0	0	31	2	0	0	0	0	0	0	0	0	0	0	0	0	0
1163	1	19380110	10	69	164.5	104	103	0.4	1.3		2.5	0	0	6	1.25	101	14	0	0	2	0	0	0	0	0	0	0	0	0	0	0	14	0	0	2	0	0	0	0	0	0	0	0	0	0	0
1164	2	19540504	4	78	155.5	114	110.5	0.1	0		-0.5	-1	82	-0.25	-0.5	90	10	0	0	0	0	0	0	0	0	0	0	0	0	0	0	10	0	0	0	0	0	0	0	0	0	0	0	0	0	0
1165	1	19481021	2	76	172	99	94	0.22	1.7		0.5	-1.25	80				37	2	0	2	0	0	0	0	0	0	0	0	0	0	0	88	8	8	8	8	8	8	8	8	8	8	8	8	8	8
1166	2	19500911	5	58	159	98	96	0	0		0.25	0.25	129	0.25	0.25	4	10	0	0	0	0	0	0	0	0	0	0	0	0	0	0	10	0	0	0	0	0	0	0	0	0	0	0	0	0	0
1167	2	19441001	3	65	163	102	99	0	1.1		0.5	1.25	4	-7.25	-3.5	69	10	0	0	0	0	0	0	0	0	0	0	0	0	0	0	10	0	0	0	0	0	0	0	0	0	0	0	0	0	0
1168	2	19521106	3	71.5	155	105	101	0.52	0.54	myopic	-1.25	-0.5	81	-1	-0.25	82	20	2	0	0	0	0	0	0	0	0	0	0	0	0	0	20	2	0	0	0	0	0	0	0	0	0	0	0	0	0
1169	1	19690506	4	75	169	102	91.5	-0.2	-0.2		0.75	0.5	169	0.75	0.25	22	10	0	0	0	0	0	0	0	0	0	0	0	0	0	0	10	0	0	0	0	0	0	0	0	0	0	0	0	0	0
1170	1	19540206	22	69	167	101	97	0	0		0.5	0.25	159	0.5	0.25	55	10	0	0	0	0	0	0	0	0	0	0	0	0	0	0	10	0	0	0	0	0	0	0	0	0	0	0	0	0	0
1171	2	19461204	5	61	153	97	102	0	0.1		0	0.75	140	0.5	0.75	2	20	2	0	0	0	0	0	0	0	0	0	0	0	0	0	10	0	0	0	0	0	0	0	0	0	0	0	0	0	0
1172	2	19320201	3	70	154	114	115	0.1	0.22		0.75	-1	102	0.75	-1.25	83	37	2	2	0	0	0	0	0	0	0	0	0	0	0	0	20	2	0	0	0	0	0	0	0	0	0	0	0	0	0
1173	1	19551128	5	67	161	100	93	0.1	0.32		0.75	-1	63	0.75	-2	88	20	2	0	0	0	0	0	0	0	0	0	0	0	0	0	37	2	2	0	0	0	0	0	0	0	0	3	0	2	0
1174	1	19590219	1	76	174.5	103	101	0.02	0.28		0.25	0.5	166	0.25	-1.25	104	37	2	2	2	0	0	0	0	0	0	0	1	0	0	0	37	2	0	2	0	0	0	0	0	0	0	0	0	0	0
1176	1	19441009	11	79	163	109	107	0.3	0.2		0.25	-1.75	79	-0.25	-0.75	82	37	2	2	0	0	0	0	0	0	0	0	0	0	0	0	37	2	0	2	0	0	0	0	0	0	0	0	0	0	0
1177	2	19491129	8	60	157	97.5	95.5	0.1	1.1		0.5	0.25	57	-10.25	-2	29	10	0	0	0	0	0	0	0	0	0	0	0	0	0	0	88	8	8	8	8	8	8	8	8	8	8	8	8	8	8
1178	2	19420910	15	60	145	100	101	0.14	0.18		1.25	1.25	5	1	1.5	16	20	2	0	0	0	0	0	0	0	0	0	0	0	0	0	20	2	0	0	0	0	0	0	0	0	0	0	0	0	0
1179	1	19680207	4	79	173.5	101	95	-0.06	0		-0.75	-0.5	35	-0.5	-0.25	116	20	2	0	0	0	0	0	0	0	0	0	0	0	0	0	37	2	0	2	1	0	0	0	0	0	0	0	0	0	0
1180	2	19350924	6	61	152.5	102	98	1.7	0.48		-0.75	-1.25	80	2	2.25	9	88	8	8	8	8	8	8	8	8	8	8	8	8	8	8	20	2	0	0	0	0	0	0	0	0	0	0	0	0	0
1181	2	19551105	8	69	161.5	103	104	0.24	0.2		-0.25	-1.75	90	-0.5	-0.75	85	10	0	0	0	0	0	0	0	0	0	0	0	0	0	0	10	0	0	0	0	0	0	0	0	0	0	0	0	0	0
1182	1	19500901	34	74	167.5	102.5	90	0.02	0.3		-0.25	-0.5	56	-1.5	-0.75	117	10	0	0	0	0	0	0	0	0	0	0	0	0	0	0	10	0	0	0	0	0	0	0	0	0	0	0	0	0	0
1183	2	19510430	10	57	160.5	99	99	0.08	0.1		0.75	-1.5	87	1	-1.5	89	10	0	0	0	0	0	0	0	0	0	0	0	0	0	0	10	0	0	0	0	0	0	0	0	0	0	0	0	0	0
1186	2	19450527	8	60	157.5	99	89	0.1	0.1		2	1.5	3	1.5	1	11	10	0	0	0	0	0	0	0	0	0	0	0	0	0	0	10	0	0	0	0	0	0	0	0	0	0	0	0	0	0
1187	2	19471127	3	56	153	99	98.5	1.1	1.1	myopic	-5.5	-0.75	97	-5.5	-0.75	93	15	2	0	0	0	0	0	0	0	0	0	0	0	0	0	10	0	0	0	0	0	0	0	0	0	0	0	0	0	0
1188	1	19501028	18	77	166	109	101	1.1	1.1	myopic	-1	-1.25	89	1.75	0.25	35	31	2	0	0	0	0	0	0	0	0	0	0	0	0	0	31	2	0	0	0	0	0	0	0	0	0	0	0	0	0
1189	2	19480229	4	73	156.5	112	107	0.3	0.2		-0.75	-2	96	-0.25	-1.5	87	10	0	0	0	0	0	0	0	0	0	0	0	0	0	0	15	2	0	0	0	0	0	0	0	0	0	0	0	0	0
1190	1	19640829	8	79	181.5	105	103	1.7	1.7	cataract				-5.5	-1.5	103																60	8	8	8	8	8	8	8	8	4	8	8	8	8	8
1192	2	19311221	3	67	145	118	114	0.1	1.7		-0.75	-1.5	103	-8	0	0	10	0	0	0	0	0	0	0	0	0	0	0	0	0	0
1193	2	19512923	14	68	154	111	103	-0.02	-0.08		0.5	0.75	156	0.75	0.5	23	31	2	0	0	0	0	0	0	0	0	0	0	0	0	0	10	0	0	0	0	0	0	0	0	0	0	0	0	0	0
1194	2	19510421	16	56	159.5	105	95	0.1	0.14		-0.25	-0.75	112	0.5	-1.25	81	13	1	0	0	0	0	0	0	0	0	0	0	0	0	0	10	0	0	0	0	0	0	0	0	0	0	0	0	0	0
1195	2	19621120	0	63	153.5	102	98	0.3	0.2		0	-1.5	82	0.25	-2.5	93	10	0	0	0	0	0	0	0	0	0	0	0	0	0	0	20	2	0	0	0	0	0	0	0	0	0	0	0	0	0
1196	1	19560712	1	82	164	112	108	0.04	0		-0.25	-0.75	53	0.25	-1.25	142	10	0	0	0	0	0	0	0	0	0	0	0	0	0	0	10	0	0	0	0	0	0	0	0	0	0	0	0	0	0
1197	1	19590102	5	72	167.5	100	104	-0.02	-0.02		0.5	1.25	10	0	1.25	162	53	6	2	2	2	0	2	0	0	0	0	3	0	2	0	65	6	2	2	4	0	0	0	3	0	0	3	0	2	0
1198	1	19520209	3	85	172	110	106	0	0.2		0.75	0.5	26	1.75	0.25	136	10	0	0	0	0	0	0	0	0	0	0	0	0	0	0	37	2	0	2	0	0	0	0	0	0	0	0	0	0	0
1199	2	19500224	4	55	147	98	94	0.1	0.2		0.5	1	143	0.75	0.5	40	20	2	0	0	0	0	0	0	0	0	0	0	0	0	0	31	2	0	0	0	0	0	0	0	0	0	0	0	0	0
1200	2	19540808	4	69	153.5	110	104	0	0.1		0	0.5	14	0	-0.25	49	20	2	0	0	0	0	0	0	0	0	0	0	0	0	0	10	0	0	0	0	0	0	0	0	0	0	0	0	0	0
1201	2	19570722	1	57.5	145	104	100	0.08	0.22		0	0.5	167	0	-0.5	100	20	2	0	0	0	0	0	0	0	0	0	0	0	0	0	10	0	0	0	0	0	0	0	0	0	0	0	0	0	0
1202	1	19440707	3	67	158	111	104	0.3	0.3		1.25	0	0	0	1	120	10	0	0	0	0	0	0	0	0	0	0	0	0	0	0	10	0	0	0	0	0	0	0	0	0	0	0	0	0	0
1203	2	19450604	1	68	153	107	102	0.1	0.1		0	1.5	177	0.25	1.75	180	10	0	0	0	0	0	0	0	0	0	0	0	0	0	0	10	0	0	0	0	0	0	0	0	0	0	0	0	0	0
1204	2	19401119	18	63	150	103	97.5	0.54	0.54	myopic	2	0.75	116	2.5	0.25	98	31	2	0	0	0	0	0	0	0	0	0	0	0	0	0	31	2	0	0	0	0	0	0	0	0	0	0	0	0	0
1205	1	19691224	1	83	170	105	99	-0.04	-0.1		-0.5	-1	88	-1	-1	93	10	0	0	0	0	0	0	0	0	0	0	0	0	0	0	10	0	0	0	0	0	0	0	0	0	0	0	0	0	0
1206	2	19520812	2	72	155	106	99	0.44	0.32		-1.75	-0.25	92	-1.5	0	0	10	0	0	0	0	0	0	0	0	0	0	0	0	0	0	10	0	0	0	0	0	0	0	0	0	0	0	0	0	0
1207	2	19570703	6	78	160	109	114	0.1	0.2		0.25	0.25	18	0.5	-0.75	117	37	2	2	0	0	0	0	0	0	0	0	0	0	0	0	37	2	2	2	0	0	0	0	0	0	0	0	0	0	0
1208	1	19410602	10	51	160	98	98	0.66	0.66	myopic	-1.75	-2.5	85	-2.25	-2.25	84	10	0	0	0	0	0	0	0	0	0	0	0	0	0	0	10	0	0	0	0	0	0	0	0	0	0	0	0	0	0
1209	1	19610610	6	70	178	106	104	0.42	0.4		-3.5	-1	101	-2.75	-2	63	10	0	0	0	0	0	0	0	0	0	0	0	0	0	0	10	0	0	0	0	0	0	0	0	0	0	0	0	0	0
1210	2	19510623	1	76	164	111	107	0.34	0.06		-1.5	-0.25	92	-0.5	-0.25	161	20	2	0	0	0	0	0	0	0	0	0	0	0	0	0	10	0	0	0	0	0	0	0	0	0	0	0	0	0	0
1211	2	19490814	5	69	164	111	108	0.16	0.1		1	-1.25	85	1.5	-2	87	20	2	0	0	0	0	0	0	0	0	0	0	0	0	0	10	0	0	0	0	0	0	0	0	0	0	0	0	0	0
1212	2	19530821	10	70	153.5	109	95.5	0.48	0.5		-4.5	-1.5	87	-5.25	-2	93	20	2	0	0	0	0	0	0	0	0	0	0	0	0	0	10	0	0	0	0	0	0	0	0	0	0	0	0	0	0
1213	2	19400117	7	77	160	111	104	0.28	0.56		-1.75	-1	55	-1.5	0	0
1214	2	19590225	2	60	159.5	100	91	0.22	0.2		0	1.5	9	0	0.75	176	10	0	0	0	0	0	0	0	0	0	0	0	0	0	0	10	0	0	0	0	0	0	0	0	0	0	0	0	0	0
1215	1	19431225	10	60	161	99	99	1.7	0.06		3	1.25	171	0.25	1.75	8	37	2	0	2	0	0	0	0	0	0	0	7	0	0	0	37	2	0	2	0	0	0	0	0	0	0	0	0	0	0
1216	1	19330213	1	87.5	169	117	116	1.1	0.6	myopic	-3.5	-3	100	-2.5	-2	95	88	8	8	8	8	8	8	8	8	8	8	8	8	8	8	14	0	2	0	0	0	0	0	0	0	0	0	0	0	0
1217	2	19340215	3	79	153	118	121	0.24	0.38		-1	-1.5	75	-2.25	-1.5	97	88	8	8	8	8	8	8	8	8	8	8	8	8	8	8	88	8	8	8	8	8	8	8	8	8	8	8	8	8	8
1218	1	19551127	7	60	166	98	89	1.1	1.52	myopic	-1	-1.25	153	-2.25	-1.5	30	37	2	2	0	0	0	0	0	0	0	0	8	0	8	0	88	8	8	8	8	8	8	8	8	8	8	8	8	8	8
1219	1	19641210	3	64	172.5	99	92.5	0.1	0.2		0	1	2	0.25	1.25	3	75	5	2	0	4	0	0	3	3	0	3	3	0	2	0	71	5	2	2	2	0	0	3	0	0	0	3	0	2	0
1220	2	19540429	3	71	157	102	91.5	1.46	0.1		-13.25	-1.5	79	-0.25	-1.25	93	88	8	8	8	8	8	8	8	8	8	8	8	8	8	8	20	2	0	0	0	0	0	0	0	0	0	0	0	0	0
1221	1	19530802	17	76	172	104	101	0.02	-0.1		0.25	0.75	4	0.25	-1.25	101	10	0	0	0	0	0	0	0	0	0	0	0	0	0	0	10	0	0	0	0	0	0	0	0	0	0	0	0	0	0
1223	2	19520528	0	63	154	106	101	1.1	0.7	myopic	-12	-6	73	-5.75	-5	111	10	0	0	0	0	0	0	0	0	0	0	0	0	0	0	10	0	0	0	0	0	0	0	0	0	0	0	0	0	0
1224	1	19560908	16	70	163	103	98	0.1	0		0.5	-0.75	101	0.25	0.5	166	37	2	0	2	1	0	0	0	0	0	0	0	0	0	0	37	2	2	2	0	0	0	0	0	0	0	0	0	0	0
1225	2	19501020	2	69	152.5	106	92	0.1	0.06		-0.5	-0.5	27	0.25	-0.75	161	10	0	0	0	0	0	0	0	0	0	0	0	0	0	0	10	0	0	0	0	0	0	0	0	0	0	0	0	0	0
1226	1	19530602	2	72	168	103	97	0.1	0.02		1.5	-1.75	88	1	-1.5	88	20	2	0	0	0	0	0	0	0	0	0	0	0	0	0	10	0	0	0	0	0	0	0	0	0	0	0	0	0	0
1228	2	19550112	2	65	151	101	96	0.54	0.6	myopic	-2.5	0	0	-2.75	0.25	93	10	0	0	0	0	0	0	0	0	0	0	0	0	0	0	10	0	0	0	0	0	0	0	0	0	0	0	0	0	0
1229	1	19450108	12	63	167	105	97	0.2	0.1		1	1.75	89	0	1.5	174	10	0	0	0	0	0	0	0	0	0	0	0	0	0	0	37	2	0	2	0	0	0	0	0	0	0	0	0	0	0
1230	2	19450701	4	59	159.5	103	97	0.3	0.24		0	-2.5	48	0.75	-1.5	111	10	0	0	0	0	0	0	0	0	0	0	0	0	0	0	10	0	0	0	0	0	0	0	0	0	0	0	0	0	0
1231	1	19470102	0	72	162.5	101	107.5	0.1	0.1		-0.25	-0.75	62	0	-1	98	10	0	0	0	0	0	0	0	0	0	0	0	0	0	0	10	0	0	0	0	0	0	0	0	0	0	0	0	0	0
1232	2	19460913	4	62	146.5	102	100	0.64	-0.1		3	0.25	84	-0.5	-0.75	89	10	0	0	0	0	0	0	0	0	0	0	0	0	0	0	10	0	0	0	0	0	0	0	0	0	0	0	0	0	0
1233	1	19460211	4	71	159	107	94	0.62	0.46		5	1.75	153	4.75	1	12	20	2	0	0	0	0	0	0	0	0	0	0	0	0	0	20	2	0	0	0	0	0	0	0	0	0	0	0	0	0
1234	2	19751124	1	92	160	118	121	0.3	0.34		-1.25	-0.75	94	-1	-1.25	83	10	0	0	0	0	0	0	0	0	0	0	0	0	0	0	10	0	0	0	0	0	0	0	0	0	0	0	0	0	0
1235	1	19550323	4	60	160	106	98	0.46	0.56		-1	-0.25	56	-1	-0.5	160	10	0	0	0	0	0	0	0	0	0	0	0	0	0	0	15	2	0	0	0	0	0	0	0	0	0	0	0	0	0
1236	1	19500219	1	86	166.5	110	114	0.06	0.04		0.75	-1.25	169	0	1	104	20	2	0	0	0	0	0	0	0	0	0	0	0	0	0	20	2	0	0	0	0	0	0	0	0	0	0	0	0	0
1237	1	19570916	4	85	173	112	109	-0.06	0		0.25	0.75	166	0.25	0.75	40	20	2	0	0	0	0	0	0	0	0	0	0	0	0	0	31	2	0	0	0	0	0	0	0	0	0	0	0	0	0
1238	1	19621223	8	72	160.5	105	101	0.4	0.2		-0.25	-0.25	24	0.25	-0.5	132	10	0	0	0	0	0	0	0	0	0	0	0	0	0	0	20	2	0	0	0	0	0	0	0	0	0	0	0	0	0
1239	2	19550919	20	74	167	104	95	1.7	0.12		-5.75	-2.25	87	-3.5	-2.25	92																62	2	0	0	0	0	0	0	0	0	0	8	3	8	8
1240	2	19540320	6	67	160	101	97	1.1	1.1	myopic	-12.5	-1.25	62	-10	-1.25	86	37	2	2	1	0	0	0	0	0	0	0	0	0	0	0	37	2	2	0	0	0	0	0	0	0	0	0	0	0	0
1241	1	19640424	7	80	175	102	102	0.2	0.2		-0.5	-1.5	65	-0.75	-1	112	47	5	2	2	0	0	0	0	0	0	0	2	0	0	0	53	6	2	2	0	0	0	0	0	0	0	2	0	0	0
1242	1	19500119	3	84	172.5	104	96	0.1	0.06		0	0.75	3	-0.75	0.5	39	20	2	0	0	0	0	0	0	0	0	0	0	0	0	0	20	2	0	0	0	0	0	0	0	0	0	0	0	0	0
1243	1	19450501	7	71	166.5	105	100	0.5	0.48		-2.5	0	0	-2	-0.25	167	20	2	0	0	0	0	0	0	0	0	0	0	0	0	0	20	2	0	0	0	0	0	0	0	0	0	0	0	0	0
1244	1	19561201	17	77	176.5	109	104	0.06	0		0.25	0.75	60	0.25	0	0	37	2	2	2	0	0	0	0	0	0	0	0	0	0	0	37	2	2	2	0	0	0	0	0	0	0	0	0	0	0
1245	2	19510309	0	53	152	93.5	87	0.36	0.34		1.5	2	180	1.5	1.75	9	31	2	0	0	0	0	0	0	0	0	0	0	0	0	0	31	2	0	0	1	0	0	0	0	0	0	0	0	0	0
1246	2	19310403	20	57	148	99.5	92	1.7	0.4		-3.5	5	85	2	-1.5	90	88	8	8	8	8	8	8	8	8	8	8	8	8	8	8	88	8	8	8	8	8	8	8	8	8	8	8	8	8	8
1247	1	19601221	14	78	164	103	100	0.02	0.06		1.5	-1.75	80	0	1.5	15	47	3	2	2	2	0	0	0	0	0	0	1	0	0	0	53	3	2	2	4	0	0	0	0	0	0	2	0	0	0
1248	1	19330127	1	65	162	93	95.5	1.7	0.7	myopic	-6.5	0	0	1.5	-2	90	88	8	8	8	8	8	8	8	8	8	8	8	8	8	8	37	2	0	2	0	0	0	0	0	0	0	0	0	0	0
1249	2	19660103	9	58	143	100	93	0.7	0.4		4.5	0.75	4	2.5	1	179	64	2	2	2	0	0	2	0	0	0	0	3	7	2	0	64	2	2	0	4	0	0	0	0	0	0	3	7	2	0
1250	2	19340210	6	46	148	97	92	1.1	0.8	uncertain	11			11			10	0	0	0	0	0	0	0	0	0	0	0	0	0	0	88	8	8	8	8	8	8	8	8	8	8	8	8	8	8
1251	1	19521223	10	74	169.5	106	95	0.26	0.54		-0.5	-1	81	-2.5	-0.25	109	37	2	2	0	0	0	0	0	0	0	0	0	0	0	0	37	2	0	2	0	0	0	0	0	0	0	0	0	0	0
1252	1	19550208	2	91	176	119	113	-0.08	0.1		1	0	0	1.25	0.5	180	20	2	0	0	0	0	0	0	0	0	0	0	0	0	0	20	2	0	0	0	0	0	0	0	0	0	0	0	0	0
1253	1	19480210	0	64	166.5	105	89	-0.08	0.2		0.75	0.75	17	1	1	178	37	2	0	2	0	0	0	0	0	0	0	0	0	0	0	37	2	0	2	0	0	0	0	0	0	0	0	0	0	0
1254	2	19580818	10	53.5	153	93	87.5	0.1	0.3		0	1	176	0.25	1.5	8	20	2	0	0	0	0	0	0	0	0	0	0	0	0	0	31	2	0	0	0	0	0	0	0	0	0	0	0	0	0
1255	2	19400102	13	64	156	101	91	0.62	0.38		-3.75	2.25	15	-3.5	2	168	10	0	0	0	0	0	0	0	0	0	0	0	0	0	0	10	0	0	0	0	0	0	0	0	0	0	0	0	0	0
1256	2	19470826	15	66	155	106	108.5	0.32	0.24		2	1	151	2.75	1	12	31	2	0	0	0	0	0	0	0	0	0	0	0	0	0	31	2	0	0	0	0	0	0	0	0	0	0	0	0	0
1257	2	19540712	9	75	167	106	105	0.62	0.46		4.5	0.5	156	4.25	0.5	34	31	2	0	0	0	0	0	0	0	0	0	0	0	0	0	37	2	2	0	0	0	0	0	0	0	0	0	0	0	0
1258	2	19540603	2	62	154	100	100	0.2	0.1		0	1	170	0.25	0.75	22	20	2	0	0	0	0	0	0	0	0	0	0	0	0	0	10	0	0	0	0	0	0	0	0	0	0	0	0	0	0
1259	2	19420525	11	66	152	110	104	0.1	0.1		-0.75	1.5	171	0	1.5	14	20	2	0	0	0	0	0	0	0	0	0	0	0	0	0	20	2	0	0	0	0	0	0	0	0	0	0	0	0	0
1261	1	19440929	3	72	161	108	102	0.3	0.3		0.5	-1.25	89	0.25	-1.5	106	20	2	0	0	0	0	0	0	0	0	0	0	0	0	0	20	2	0	0	0	0	0	0	0	0	0	0	0	0	0
1262	1	19390202	5	78	162.5	108.5	105	0.1	0.1		0.25	1.25	162	0.5	1	7	10	0	0	0	0	0	0	0	0	0	0	0	0	0	0	15	2	0	0	0	0	0	0	0	0	0	0	0	0	0
1263	2	19521222	5	80	161.5	112	96	0.06	0.06		1.5	0.5	163	1	0.5	15	15	2	0	0	0	0	0	0	0	0	0	0	0	0	0	31	2	0	0	0	0	0	0	0	0	0	0	0	0	0
1265	2	19331211	10	42	143	89	94	0.04	0.04		0	-0.25	70	0.5	-1	89	20	2	0	0	0	0	0	0	0	0	0	0	0	0	0	20	2	0	0	0	0	0	0	0	0	0	0	0	0	0
1266	2	19540427	28	61	156	101.5	100	1.52	1.7	PDR	3.75	8.5	32				61	0	0	0	0	0	0	0	0	4	0	8	3	8	8
1267	1	19600120	3	55	161	99	76	0.3	0.1		0.25	-1.75	80	0	-1.5	89	10	0	0	0	0	0	0	0	0	0	0	0	0	0	0	10	0	0	0	0	0	0	0	0	0	0	0	0	0	0
1268	2	19630724	10	70	159.5	110	99.5	0.36	0.1		0.75	-1.25	50	0.25	1	25	37	2	0	2	0	0	0	0	0	0	0	0	0	0	0	47	5	2	2	0	0	0	0	0	0	0	0	0	0	0
1269	2	19371223	7	81	153	112	114	0.1	0.1		0.5	-1.5	98	2.5	-2.75	94	31	2	0	0	0	0	0	0	0	0	0	0	0	0	0	31	2	0	0	0	0	0	0	0	0	0	0	0	0	0
1270	2	19540210	2	56	161	95	89.5	0.32	0.3		-0.75	-0.25	87	-0.75	-0.75	172	10	0	0	0	0	0	0	0	0	0	0	0	0	0	0	15	2	0	0	0	0	0	0	0	0	0	0	0	0	0
1271	1	19550127	1	57	167.5	98	83	0.36	0.32		-0.75	-1.25	89	-1	-1.25	86	10	0	0	0	0	0	0	0	0	0	0	0	0	0	0	20	2	0	0	0	0	0	0	0	0	0	0	0	0	0
1272	1	19620216	5	69	171	98	83	0.48	0.6		-0.75	-2.25	77	-1	-2	114	37	2	1	2	0	0	0	0	0	0	0	0	0	0	0	88	8	8	8	8	8	8	8	8	8	8	8	8	8	8
1273	2	19540115	12	57	155	98	91	0.3	0.3		0.75	0.25	148	0.75	0.75	4	37	2	0	2	0	0	0	0	0	0	0	0	0	0	0	37	2	2	0	0	0	0	0	0	0	0	0	0	0	0
1274	1	19380515	5	81	165	113	105	0.1	0.1		1	0.75	22	1	0.75	4	20	2	0	0	0	0	0	0	0	0	0	0	0	0	0	20	2	0	0	0	0	0	0	0	0	0	0	0	0	0
1275	1	19600501	20	59	166.5	98	85	0	0		-0.25	-0.5	21	-0.25	-0.5	164	65	3	2	2	4	1	0	0	3	2	0	0	0	0	0	65	3	2	2	2	0	0	0	3	1	0	0	0	0	0
1276	1	19620918	7	84.5	162	108	102	0.16	0.1		1.5	0.75	149	1	0.5	67	53	3	2	2	4	0	0	0	0	0	0	2	0	0	0	47	4	2	0	2	0	0	0	0	0	0	0	0	0	0
1277	1	19510906	24	68	164.5	97	89	0.44	0.92		-1.5	-1.5	95	-4	-1	78	63	2	2	0	0	0	0	0	0	0	0	0	3	0	3	62	2	0	0	0	0	0	0	0	0	0	0	3	0	3
1278	1	19500427	2	77	169	102	91	-0.02	0.02		0	-0.5	99	0.25	-0.75	90	10	0	0	0	0	0	0	0	0	0	0	0	0	0	0	10	0	0	0	0	0	0	0	0	0	0	0	0	0	0
1279	1	19570516	12	69	169	101	89	-0.1	-0.1		0	0.25	18	0	0	0	43	4	0	2	0	0	0	0	0	0	0	0	0	0	0	37	2	0	2	0	0	0	0	0	0	0	0	0	0	0
1281	2	19480602	0	84	160.5	119	117	0.1	0.08		0	-0.5	98	0	-0.5	85	20	2	0	0	0	0	0	0	0	0	0	0	0	0	0	20	2	0	0	0	0	0	0	0	0	0	0	0	0	0
1282	1	19600601	2	74	172	107	101	-0.06	-0.02		0.75	-1.5	83	0	0.5	2	37	2	2	2	0	0	0	0	0	0	0	0	0	0	0	37	2	0	2	0	0	0	0	0	0	0	0	0	0	0
1283	2	19580620	1	66	152	102	99	-0.1	-0.1		0.75	0.25	14	0.25	0.25	1	10	0	0	0	0	0	0	0	0	0	0	0	0	0	0	20	2	0	0	0	0	0	0	0	0	0	0	0	0	0
1284	2	19470901	6	64.5	154	106	98	0.32	0.18		1.5	1.25	4	0.75	2	2	10	0	0	0	0	0	0	0	0	0	0	0	0	0	0	10	0	0	0	0	0	0	0	0	0	0	0	0	0	0
1285	2	19460327	3	55	152	86	98	0.54	0.54	myopic	2.5	3.25	93	4.25	1.25	49	31	2	0	0	0	0	0	0	0	0	0	0	0	0	0	31	2	0	0	0	0	0	0	0	0	0	0	0	0	0
1286	1	19460829	14	75	173	107	91	1.1	1.1	myopic	-2.5	-1.25	87	-3.75	-5	155	15	2	0	0	0	0	0	0	0	0	0	0	0	0	0	20	2	0	0	0	0	0	0	0	0	0	0	0	0	0
1288	2	19531110	2	52	158.5	96	82	0.1	0.1		0.75	0.25	121	0.25	1.5	16	10	0	0	0	0	0	0	0	0	0	0	0	0	0	0	10	0	0	0	0	0	0	0	0	0	0	0	0	0	0
1289	2	19640116	10	58	154	98	90	0	0.1		0.25	0.25	152	0	0.75	13	20	2	0	0	0	0	0	0	0	0	0	0	0	0	0	31	2	1	0	0	0	0	0	0	0	0	0	0	0	0
1290	2	19621225	6	78	162	103	102	0	0		0.25	-1	85	0.25	-0.5	90	10	0	0	0	0	0	0	0	0	0	0	0	0	0	0	10	0	0	0	0	0	0	0	0	0	0	0	0	0	0
1291	2	19520709	6	56	154.5	102	90	0.22	0.22		-1.75	-0.5	113	-1.75	-0.5	73	37	2	2	0	0	0	0	0	0	0	0	0	0	0	0	37	2	2	0	0	0	0	0	0	0	0	0	0	0	0
1292	2	19431005	5	53	153.5	100	93	-0.08	-0.08		0.25	0.5	179	0.5	0	0	10	0	0	0	0	0	0	0	0	0	0	7	0	7	0	20	2	0	0	0	0	0	0	0	0	0	0	0	0	0
1293	2	19520504	10	66	152.5	106	95	0.1	0		1.25	0.5	6	1.25	0.25	2	20	2	0	0	0	0	0	0	0	0	0	0	0	0	0	20	2	0	0	0	0	0	0	0	0	0	0	0	0	0
1294	2	19430228	6	70	162	111	100	0.1	0.1		0.25	0.75	158	0	1.5	168	37	2	2	0	0	0	0	0	0	0	0	0	0	0	0	37	2	2	0	0	0	0	0	0	0	0	0	0	0	0
1295	2	19500514	11	67	152	100	97	0.6	0.08		1	-3	80	1	-2.5	93	15	2	0	0	0	0	0	0	0	0	0	0	0	0	0	10	0	0	0	0	0	0	0	0	0	0	0	0	0	0
1296	2	19450522	18	65	151	110	102	0.3	0.3		1.25	-1.75	80	0.75	-1.25	121	37	2	2	0	0	0	0	0	0	0	0	0	0	0	0	20	2	1	0	0	0	0	0	0	0	0	0	0	0	0
1297	2	19570819	11	63.5	151	94	90	-0.04	-0.02		0	0.25	165	-0.25	0	0	10	0	0	0	0	0	0	0	0	0	0	0	0	0	0	20	2	0	0	1	0	0	0	0	0	0	0	0	0	0
1298	2	19561111	2	65	164.5	96	95	1.1	0.66	myopic	-10	-0.5	153	-5.25	-1.75	165	10	0	0	0	0	0	0	0	0	0	0	0	0	0	0	10	0	0	0	0	0	0	0	0	0	0	0	0	0	0
1299	2	19550801	2	51	150	90	93	0	0		0.25	-0.5	24	0	0.75	12	10	0	0	0	0	0	0	0	0	0	0	0	0	0	0	10	0	0	0	0	0	0	0	0	0	0	0	0	0	0
1300	2	19490909	16	70	156	105	93	1.1	1.1	myopic	-4.75	-1.25	76	-3.75	-0.75	100	20	2	0	0	0	0	0	0	0	0	0	0	0	0	0	37	2	2	0	0	0	0	0	0	0	0	0	0	0	0
1301	1	19540524	2	74.5	162.5	93.5	94	0.1	0.1		0	0.5	169	0	-0.25	118	10	0	0	0	0	0	0	0	0	0	0	0	0	0	0	20	2	0	0	0	0	0	0	0	0	0	0	0	0	0
1302	1	19311218	4	57	155	95	91	0.54	0.48		-2.25	0	0	0	-1.5	100	88	8	8	8	8	8	8	8	8	8	8	8	8	8	8	88	8	8	8	8	8	8	8	8	8	8	8	8	8	8
1303	1	19560417	7	79	176.5	95	96	-0.12	-0.06		-0.25	-0.25	146	0	-0.25	164	20	2	0	0	0	0	0	0	0	0	0	0	0	0	0	15	2	0	0	0	0	0	0	0	0	0	0	0	0	0
1304	1	19380224	1	67	167.5	108	108	1.4	0.2		1	-1.25	66	1	-1.25	90	88	8	8	8	8	8	8	8	8	8	8	8	8	8	8	10	0	0	0	0	0	0	0	0	0	0	0	0	0	0
1305	2	19570130	0	63	153	101	92	0	-0.04		0.25	-0.5	65	0.25	-0.75	100	15	2	0	0	0	0	0	0	0	0	0	0	0	0	0	10	0	0	0	0	0	0	0	0	0	0	0	0	0	0
1306	2	19540312	3	68.5	155.5	101	103	0.4	0.1		2	0.25	144	0.75	0.75	24	10	0	0	0	0	0	0	0	0	0	0	0	0	0	0	10	0	0	0	0	0	0	0	0	0	0	0	0	0	0
1307	2	19551126	9	90	157	115	112	0.16	0.1		1.25	0.25	1	1.25	0.25	6	10	0	0	0	0	0	0	0	0	0	0	0	0	0	0	20	2	0	0	0	0	0	0	0	0	0	0	0	0	0
1308	2	19320628	3	57	152	100	89.5	0.62	0.48		-5	-0.5	22	-4.75	0.75	130	10	0	0	0	0	0	0	0	0	0	0	0	0	0	0	10	0	0	0	0	0	0	0	0	0	0	0	0	0	0
1309	2	19580228	2	71	156.5	111	98	0.2	0		-1.25	-1	100	-0.25	-0.5	80	20	2	0	0	0	0	0	0	0	0	0	0	0	0	0	10	0	0	0	0	0	0	0	0	0	0	0	0	0	0
1310	2	19431106	4	71	159	112	109	0.2	0.16		1.5	0	0	0.5	0.25	100	10	0	0	0	0	0	0	0	0	0	0	0	0	0	0	10	0	0	0	0	0	0	0	0	0	0	0	0	0	0
1311	1	19360304	3	71	160	112	109	1.1	0.32		-2	-2	92	0.5	-2.75	74	88	8	8	8	8	8	8	8	8	8	8	8	8	8	8	10	0	0	0	0	0	0	0	0	0	0	0	0	0	0
1312	1	19610805	5	112	169	128	118	0.2	0.14		0	-0.75	87	-0.5	-0.75	89	20	2	0	0	0	0	0	0	0	0	0	0	0	0	0	10	0	0	0	0	0	0	0	0	0	0	0	0	0	0
1313	2	19540317	6	55	152	98	82	-0.06	0.04		0.25	1	177	0.25	1.75	12	10	0	0	0	0	0	0	0	0	0	0	0	0	0	0	10	0	0	0	0	0	0	0	0	0	0	0	0	0	0
1315	1	19590930	3	101	175	111	104	0.4	0.32		-0.5	-1.75	66	-0.25	-1.75	4	53	2	2	2	4	0	0	0	0	0	0	1	0	0	0	53	2	0	1	4	0	0	0	0	0	0	0	0	0	0
1316	1	19630113	4	66	166	102	92	0.02	-0.02		0.5	0.25	107	0.25	-0.75	4	37	2	2	0	0	0	0	0	0	0	0	0	0	0	0	37	2	2	0	0	0	0	0	0	0	0	0	0	0	0
1317	1	19630331	9	82	175	109	92	0	-0.1		0.25	-1	59	0	-0.5	97	10	0	0	0	0	0	0	0	0	0	0	0	0	0	0	20	2	0	0	0	0	0	0	0	0	0	0	0	0	0
1318	2	19440925	4	52	150	95	85	0.06	0.2		0.5	1.25	174	1.25	0.5	16	37	2	2	0	0	0	0	0	0	0	0	0	0	0	0	37	2	2	0	0	0	0	0	0	0	0	0	0	0	0
1319	1	19640822	13	94	167	115	110	0.5	0.44		-2.5	-0.5	26	-2	-1	123	20	2	0	0	0	0	0	0	0	0	0	0	0	0	0	20	2	1	0	0	0	0	0	0	0	0	0	0	0	0
1320	1	19620831	3	77	170	109	96	0.1	0.1		0.25	0.25	171	1	0	0	20	2	0	0	0	0	0	0	0	0	0	0	0	0	0	10	0	0	0	0	0	0	0	0	0	0	0	0	0	0
1321	1	19671107	9	71	172.5	97.5	86	0.02	0.12		-0.25	-1.25	171	0.25	-0.75	98	20	2	0	0	0	0	0	0	0	0	0	0	0	0	0	31	2	0	0	0	0	0	0	0	0	0	0	0	0	0
1322	2	19460605	21	78	150	113	104	0.2	0.2		-0.25	1.25	172	1.25	0.5	17	37	2	2	2	0	0	0	0	0	0	0	0	0	0	0	37	2	2	0	0	0	0	0	0	0	0	1	0	0	0
1323	2	19440127	21	68	156	107	98	0.28	0.22		0.5	1.75	179	0.25	2	8	20	2	0	0	0	0	0	0	0	0	0	0	0	0	0	31	2	0	0	0	0	0	0	0	0	0	0	0	0	0
1324	1	19481112	6	55	161	101	84.5	0.1	0.06		1	1	4	1.25	0.5	149	20	2	0	0	0	0	0	0	0	0	0	0	0	0	0	10	0	0	0	0	0	0	0	0	0	0	0	0	0	0
1325	2	19621115	2	55	156.5	92.5	85	1.1	1.34	myopic maculopathy	-12.25	2	12	-14.5	3.25	177	20	2	0	0	0	0	0	0	0	0	0	0	0	0	0	20	2	0	0	0	0	0	0	0	0	0	0	0	0	0
1326	1	19531219	7	79	164.5	105	97	0.06	0		-0.5	1	73	0	0.25	82	10	0	0	0	0	0	0	0	0	0	0	0	0	0	0	31	2	0	0	0	0	0	0	0	0	0	0	0	0	0
1327	1	19680816	1	87	175	109	95	-0.02	0.5		0	0.5	81	-5.5	5.5	85	88	8	8	8	8	8	8	8	8	8	8	8	8	8	8	10	0	0	0	0	0	0	0	0	0	0	0	0	0	0
1328	2	19460409	10	64	161	104	94	0.2	0.1		1.25	0.25	57	0.5	1	24	10	0	0	0	0	0	0	0	0	0	0	0	0	0	0	13	1	0	0	0	0	0	0	0	0	0	0	0	0	0
1329	2	19520316	0	62	161.5	103.5	90	0.48	0.5		-1.5	3	174	-1.75	2.25	14	88	8	8	8	8	8	8	8	8	8	8	8	8	8	8	10	0	0	0	0	0	0	0	0	0	0	0	0	0	0
1330	2	19600417	0	54	150	90	92	0.2	0.26		-1	0.25	162	-1.25	0.75	7	10	0	0	0	0	0	0	0	0	0	0	0	0	0	0	10	0	0	0	0	0	0	0	0	0	0	0	0	0	0
1331	1	19440213	8	76	172	109	92	1.7	0.32					-2.25	2.5	14																20	2	0	0	0	0	0	0	0	0	0	0	0	0	0
1332	2	19430401	6	73	159	104	107	0.1	0.2		1.5	0.25	61	0.5	0.5	127	10	0	0	0	0	0	0	0	0	0	0	0	0	0	0	31	2	0	0	0	0	0	0	0	0	0	0	0	0	0
1333	2	19540707	6	78	159	109	99	0.42	0.24		-3	2	169	-2	1.25	10	31	2	0	0	0	0	0	0	0	0	0	0	0	0	0	31	2	0	0	0	0	0	0	0	0	0	0	0	0	0
1334	1	19370201	26	82.5	162.5	117	115	0.4	0.54		2.5	0.5	14	2.75	0	0	31	2	1	0	0	0	0	0	0	0	0	0	0	0	0	37	2	2	0	0	0	0	0	0	0	0	0	0	0	0
1335	2	19410706	8	69	155	109	105	0.3	0.3		1	1.75	1	1.5	1.5	175	37	2	0	2	0	0	0	0	0	0	0	0	0	0	0	20	2	1	0	0	0	0	0	0	0	0	0	0	0	0
1336	1	19640613	10	61	173	96	92	1.1	1.7	cataract	-5.25	0.75	117	-5	0	0	88	8	8	8	8	8	8	8	8	8	8	8	8	8	8
1337	1	19381219	27	73	162.5	110	92.5	0	0		-1.5	1.5	179	-0.5	1.25	5	10	0	0	0	0	0	0	0	0	0	0	0	0	0	0	31	2	0	0	0	0	0	0	0	0	0	0	0	0	0
1338	1	19420331	2	67	165.5	110	94	0.26	0		0.25	1.5	175	0	1.5	175	10	0	0	0	0	0	0	0	0	0	0	0	0	0	0	20	2	0	0	0	0	0	0	0	0	0	0	0	0	0
1339	2	19451116	10	53	156	93.5	84	1.1	1.1	myopic	-6.75	2	165	-4.75	1.5	16	31	2	0	0	0	0	0	0	0	0	0	0	0	0	0	37	2	2	0	0	0	0	0	0	0	0	0	0	0	0
1340	1	19491005	0	75	163.5	110	89	-0.06	-0.02		0.75	0.5	160	0.75	0.5	178	12	2	0	0	0	0	0	0	0	0	0	0	0	0	0	13	1	0	0	0	0	0	0	0	0	0	0	0	0	0
1341	1	19530103	10	81	181	109	95	0.06	0.08		0.5	0.75	179	0.5	0	0	20	2	0	0	0	0	0	0	0	0	0	0	0	0	0	20	2	0	0	0	0	0	0	0	0	0	0	0	0	0
1342	2	19600714	5	66	157	99	95	0.22	0.3		1.25	1.25	172	-1.5	1.5	9	10	0	0	0	0	0	0	0	0	0	0	0	0	0	0	10	0	0	0	0	0	0	0	0	0	0	0	0	0	0
1344	2	19540705	13	86	158	111	109	0.48	0.5		-0.75	1	177	-0.75	1.25	176	63	2	2	0	0	0	0	0	0	0	0	3	3	2	0	62	2	0	0	0	0	0	0	0	1	0	3	7	2	0
1345	1	19561220	8	65	164	92	89.5	0.3	0.3		-1.75	2.25	6	-1	2	1	43	2	0	0	2	0	0	0	0	0	0	0	0	0	0	43	2	2	0	2	0	0	0	0	0	0	0	0	0	0
1346	2	19511228	4	71	159	102	99.5	0.6	0.6	myopic	-3	0.75	165	-3	1.25	180	10	0	0	0	0	0	0	0	0	0	0	0	0	0	0	10	0	0	0	0	0	0	0	0	0	0	0	0	0	0
1347	1	19600201	3	72	171	108	92	0.34	0.54		-3.75	2.75	171	-5.5	4.5	9	10	0	0	0	0	0	0	0	0	0	0	0	0	0	0	13	1	1	0	0	0	0	0	0	0	0	0	0	0	0
1348	1	19391214	11	79	171	109	97	0.4	0.4		-1.75	1.75	4	-3.5	2	180	37	2	2	0	0	0	0	0	0	0	0	0	0	0	0	88	8	8	8	8	8	8	8	8	8	8	8	8	8	8
1349	2	19470923	9	47	164	96	87	0.1	0.1		1.75	0.25	6	1.5	1	24	20	2	0	0	0	0	0	0	0	0	0	0	0	0	0	10	0	0	0	0	0	0	0	0	0	0	0	0	0	0
1350	1	19461014	14	67	169	101	88	0.1	0.58		1	1.25	172	2	0.75	13	37	2	2	0	0	0	0	0	0	0	0	0	0	0	0	37	2	2	0	0	0	0	0	0	0	0	0	0	0	0
1351	2	19540604	5	82	156	115	109	0.14	0.1		-1.25	1.75	13	-1	1.25	178	65	5	0	2	2	0	0	0	3	0	0	1	0	0	0	53	6	0	2	2	0	0	0	0	0	0	2	0	0	0
1352	1	19381203	16	68	175	97	105	0.64	1.1	myopic	-3.5	0.75	42	-7.5	0.75	107	10	0	0	0	0	0	0	0	0	0	0	0	0	0	0	20	2	0	0	0	0	0	0	0	0	0	0	0	0	0
1353	2	19430722	14	61	158	99	97	0.42	0.4		0.75	0.75	91	0.25	1	75	31	2	0	0	0	0	0	0	0	0	0	0	0	0	0	20	2	0	0	0	0	0	0	0	0	0	0	0	0	0
1355	1	19361129	4	87	160	117	106	0.26	0.3		1.5	0.25	70	2	0.75	160	20	2	0	0	0	0	0	0	0	0	0	0	0	0	0	37	2	0	2	0	0	0	0	0	0	0	0	0	0	0
1356	2	19570516	2	75	162	103	93	0.06	0.1		-0.5	1	176	0.25	0.5	176	10	0	0	0	0	0	0	0	0	0	0	0	0	0	0	10	0	0	0	0	0	0	0	0	0	0	0	0	0	0
1357	2	19350903	6	52	145	99	87	0.2	0.4		-4.25	4.25	89	1.25	1.25	17	88	8	8	8	8	8	8	8	8	8	8	8	8	8	8	31	2	0	0	0	0	0	0	0	0	0	0	0	0	0
1358	1	19481011	12	65	163	103	86	0.48	0.5		0	1.5	115	1.25	1	21	20	2	0	0	0	0	0	0	0	0	0	0	0	0	0	10	0	0	0	0	0	0	0	0	0	0	0	0	0	0
1359	2	19330503	20	54	150.5	101	90	0.7	1.7	cataract	-7.5	2	160				88	8	8	8	8	8	8	8	8	8	8	8	8	8	8	85	8	8	8	8	8	8	8	8	8	3	8	8	8	8
1360	1	19590203	20	63	169	102	83	0.26	0.3		-1	1.75	177	-0.75	1.25	169	37	2	2	0	0	0	0	0	0	0	0	0	0	0	0	37	2	2	0	0	0	0	0	0	0	0	0	0	0	0
1362	2	19451219	1	74	155	112	107	0.1	0.1		0.75	1	159	0.75	1.25	19	10	0	0	0	0	0	0	0	0	0	0	0	0	0	0	10	0	0	0	0	0	0	0	0	0	0	0	0	0	0
1363	2	19490808	12	72	157.5	104	100	0.2	0.2		1	1	175	1	2.5	180	15	2	0	0	0	0	0	0	0	0	0	0	0	0	0	10	0	0	0	0	0	0	0	0	0	0	0	0	0	0
1364	2	19340226	10	55	141	104	94	1.7	0.1		0.25	1.5	170	-10.5	0.75	37	53	2	2	2	0	0	3	0	0	0	0	7	0	7	0	37	2	2	0	0	0	0	0	0	0	0	0	0	0	0
1365	1	19570105	6	82	164	106	96	0.02	0		-0.25	1	170	-0.25	0.5	6	10	0	0	0	0	0	0	0	0	0	0	0	0	0	0	10	0	0	0	0	0	0	0	0	0	0	0	0	0	0
1366	2	19660617	9	61	154.5	99	94	0.06	0.1		-1	1	2	-1.25	0.25	40	37	2	2	2	0	0	0	0	0	0	0	0	0	0	0	43	4	2	2	0	0	0	0	0	0	0	3	0	2	0
1367	1	19570118	12	71	165	105	83	0.6	0.56	myopic	-1	1.25	180	0	1.25	170	37	2	2	0	0	0	0	0	0	0	0	0	0	0	0	20	2	1	0	0	0	0	0	0	0	0	0	0	0	0
1368	2	19370825	26	60	148	108	101	0.2	0.14		0.25	1.5	173	0.5	0.75	13	88	8	8	8	8	8	8	8	8	8	8	8	8	8	8	10	0	0	0	0	0	0	0	0	0	0	0	0	0	0
1369	2	19680418	10	60.5	156.5	90.5	88	1.1	1.1	myopic	-6.5	0	0	-5.5	0.25	161	37	2	1	2	0	0	0	0	0	0	0	0	0	0	0	31	2	1	0	0	0	0	0	0	0	0	0	0	0	0
1370	2	19570220	3	77	162.5	105	106.5	0	0.02		0.5	0	0	0.75	0.75	4	10	0	0	0	0	0	0	0	0	0	0	0	0	0	0	10	0	0	0	0	0	0	0	0	0	0	0	0	0	0
1371	2	19461023	3	89	152.5	127	114	0	0		1	1	174	0.5	0.5	174	10	0	0	0	0	0	0	0	0	0	0	0	0	0	0	10	0	0	0	0	0	0	0	0	0	0	0	0	0	0
1372	1	19390525	7	72	166	111	99	0.1	1.5		-1.25	1.75	9	-2	0	0	20	2	0	0	0	0	0	0	0	0	0	0	0	0	0	85	8	8	8	8	8	8	8	8	8	2	8	8	8	8
1373	2	19540624	6	70	158	101	102	-0.1	-0.08		0	0.5	167	-0.25	0.5	7	15	2	0	0	0	0	0	0	0	0	0	0	0	0	0	37	2	0	2	0	0	0	0	0	0	0	0	0	0	0
1374	1	19390828	2	47	160	97	74	1.1	1.1	amblyopia	7.5	1.5	180	7.5	1.5	25	10	0	0	0	0	0	0	0	0	0	0	0	0	0	0	10	0	0	0	0	0	0	0	0	0	0	0	0	0	0
1375	2	19480625	0	77	149	113	110	0.1	0.1		-0.25	1	173	0.5	0.5	174	20	2	0	0	0	0	0	0	0	0	0	0	0	0	0	10	0	0	0	0	0	0	0	0	0	0	0	0	0	0
1376	1	19570805	7	90	182	103	99	0.24	0.52		-0.75	0.25	1	-1.25	0.5	175	10	0	0	0	0	0	0	0	0	0	0	0	0	0	0	37	2	0	2	0	0	0	0	0	0	0	0	0	0	0
1377	1	19691117	3	78	166	103	96.5	0.3	0.22		-2	0.25	133	-2.25	0.5	47	31	2	0	0	0	0	0	0	0	0	0	0	0	0	0	20	2	0	0	0	0	0	0	0	0	0	0	0	0	0
1378	2	19530429	10	57	153.5	98	93	0.52	1.52	myopic	-4	2.25	178	-5	0	0	37	2	0	2	0	0	0	0	0	0	0	2	0	0	0	88	8	8	8	8	8	8	8	8	8	8	8	8	8	8
1379	1	19270921	3	67	168	105.5	91	1.4	0.1		-2.75	5.5	1	0.25	1.75	12	12	2	0	0	0	0	0	0	0	0	0	0	0	0	0	20	2	0	0	0	0	0	0	0	0	0	0	0	0	0
1380	2	19520404	13	62.5	168.5	101.5	90	0.38	0.2		-1.25	2	6	-0.25	0.5	19	37	2	2	0	0	0	0	0	0	0	0	0	0	0	0	37	2	2	0	0	0	0	0	0	0	0	0	0	0	0
1381	2	19521208	4	77	161	110	106	0.1	0		0.75	0.5	7	0	0.5	15	10	0	0	0	0	0	0	0	0	0	0	0	0	0	0	10	0	0	0	0	0	0	0	0	0	0	0	0	0	0
1382	2	19511004	5	67	157.5	103	101.5	0.46	0.34		-3.5	2.5	119	-4	1.5	103	20	2	0	0	0	0	0	0	0	0	0	0	0	0	0	88	8	8	8	8	8	8	8	8	8	8	8	8	8	8
1383	1	19411202	6	88	169	119	106	0.1	0.06		0	0.75	179	0.25	1.5	31	88	8	8	8	8	8	8	8	8	8	8	8	8	8	8	88	8	8	8	8	8	8	8	8	8	8	8	8	8	8
1384	1	19520417	6	78	173.5	105	91	-0.06	1.1		0.75	0	0	1	0.25	82	10	0	0	0	0	0	0	0	0	0	0	0	0	0	0	10	0	0	0	0	0	0	0	0	0	0	0	0	0	0
1385	1	19630211	10	58	163	96	80	1.1	0.46		-2	1.25	178	-0.75	0	0	43	2	2	2	2	0	0	0	0	0	0	1	0	0	0	47	5	2	2	0	0	0	0	0	0	0	2	0	0	0
1386	1	19621223	17	68	176	95	83	-0.04	-0.02		0.25	0.25	5	0	0.25	49	53	4	2	2	4	0	0	0	0	0	0	0	0	0	0	47	4	2	2	2	0	0	0	0	0	0	3	0	2	0
1387	1	19440308	7	66	166.5	105	88	0.2	0.2		1	0.25	82	1.25	0.5	126	13	1	0	0	0	0	0	0	0	0	0	0	0	0	0	10	0	0	0	0	0	0	0	0	0	0	0	0	0	0
1388	2	19500722	3	72	152	111	105	0.1	0.1		0.5	0.5	149	0.25	0.75	30	20	2	0	0	0	0	0	0	0	0	0	0	0	0	0	10	0	0	0	0	0	0	0	0	0	0	0	0	0	0
1389	2	19460427	3	72	160	107	98	0.1	0.34		0.25	2.75	180	-0.5	4.5	4	10	0	0	0	0	0	0	0	0	0	0	0	0	0	0	10	0	0	0	0	0	0	0	0	0	0	0	0	0	0
1390	1	19440310	4	61.5	165	100	80	0.2	0		-1	3	172	0	1.25	2	10	0	0	0	0	0	0	0	0	0	0	0	0	0	0	20	2	0	0	0	0	0	0	0	0	0	0	0	0	0
1392	1	19561001	5	81	169	100	101	0	0		0	0.75	180	0.25	0.5	25	20	2	0	0	0	0	0	0	0	0	0	0	0	0	0	20	2	0	0	0	0	0	0	0	0	0	0	0	0	0
1393	1	19571030	6	70	162.5	105	100	0.28	0.3		2.75	0.5	86	3.25	0.25	95	20	2	0	0	0	0	0	0	0	0	0	0	0	0	0	20	2	0	0	0	0	0	0	0	0	0	0	0	0	0
1394	2	19401123	6	60	149	105	91	0.22	0.22		2	1	168	2.5	0.25	29	15	2	0	0	0	0	0	0	0	0	0	0	0	0	0	31	2	0	0	0	0	0	0	0	0	0	0	0	0	0
1395	1	19401016	3	77	170	108	98	0.32	0.1		-1.25	0.75	175	-0.5	0.5	179	20	2	0	0	0	0	0	0	0	0	0	0	0	0	0	10	0	0	0	0	0	0	0	0	0	0	0	0	0	0
1396	2	19431024	8	67	147	106	103.5	0.1	0.02		1.5	0.75	140	-0.25	0.5	19	10	0	0	0	0	0	0	0	0	0	0	0	0	0	0	10	0	0	0	0	0	0	0	0	0	0	0	0	0	0
1397	2	19390822	7	69	147	111	105	0.02	0.42		0	0.5	169	1	0.5	23	10	0	0	0	0	0	0	0	0	0	0	0	0	0	0	20	2	0	0	0	0	0	0	0	0	0	0	0	0	0
1398	2	19570802	2	65	153	96	95	0.42	0.6		-1.5	0.25	3	-3.25	0.25	163	10	0	0	0	0	0	0	0	0	0	0	0	0	0	0	10	0	0	0	0	0	0	0	0	0	0	0	0	0	0
1399	2	19430909	15	82	164	110	108	0.14	0.2		0.25	0.5	26	-0.25	0.25	170	10	0	0	0	0	0	0	0	0	0	0	0	0	0	0	37	2	2	0	0	0	0	0	0	0	0	0	0	0	0
1400	2	19500721	5	63	143	107	104	0.04	0.02		0	0.5	167	0	0.75	8	20	2	0	0	0	0	0	0	0	0	0	0	0	0	0	10	0	0	0	0	0	0	0	0	0	0	0	0	0	0
1402	1	19530630	6	75	165	104	85	0.04	0		0.25	0.25	7	0	1.25	18	31	2	0	0	0	0	0	0	0	0	0	0	0	0	0	31	2	0	0	0	0	0	0	0	0	0	0	0	0	0
1403	1	19500616	8	64	161	101	91	0.2	0.64		-1.25	1.75	177	-5.75	2.5	13	31	2	0	0	0	0	0	0	0	0	0	0	0	0	0	37	2	0	2	0	0	0	0	0	0	0	0	0	0	0
1404	2	19560409	10	72	172	106.5	102.5	0.32	0.22		-0.75	-1.5	88	-0.5	-1.75	82	37	2	2	2	0	0	0	0	0	0	0	0	0	0	0	37	2	2	2	0	0	0	0	0	0	0	0	0	0	0
1405	2	19460419	3	82	163	113.5	111	0.18	0.28		-0.75	1	112	-0.75	1.5	60	37	2	2	0	0	0	0	0	0	0	0	0	0	0	0	15	2	0	0	0	0	0	0	0	0	0	0	0	0	0
1406	1	19521003	3	67	164	102	84.5	0.08	1.1		0	0.5	174	-1	1.25	171	10	0	0	0	0	0	0	0	0	0	0	0	0	0	0	10	0	0	0	0	0	0	0	0	0	0	0	0	0	0
1407	2	19490213	0	68	157	102	95.5	0.38	0.38		-2.75	0.5	168	-2.25	0.25	111	10	0	0	0	0	0	0	0	0	0	0	0	0	0	0	10	0	0	0	0	0	0	0	0	0	0	0	0	0	0
1408	2	19480126	5	82	158.5	114	113	0	0.06		0.75	0.75	161	0.25	1.25	4	37	2	2	0	0	0	0	0	0	0	0	0	0	0	0	31	2	0	0	0	0	0	0	0	0	0	0	0	0	0
1409	1	19680928	10	96	180	113	102	0.2	0.32		-2	0.25	119	-2	0.25	124	10	0	0	0	0	0	0	0	0	0	0	0	0	0	0	10	0	0	0	0	0	0	0	0	0	0	0	0	0	0
1410	1	19470209	5	72	170	104	92.5	0.02	0.02		0.25	0.5	33	-0.25	1	173	10	0	0	0	0	0	0	0	0	0	0	0	0	0	0	10	0	0	0	0	0	0	0	0	0	0	0	0	0	0
1411	2	19590718	6	66	161	103	87	0.04	0.08		-1.25	0.5	96	-1	0.25	176	31	2	0	0	0	0	0	0	0	0	0	0	0	0	0	10	0	0	0	0	0	0	0	0	0	0	0	0	0	0
1412	2	19490317	2	81	155	119	116	1.24	1.1	myopic	-6.5	1.75	173	-6	1.25	1	10	0	0	0	0	0	0	0	0	0	0	0	0	0	0	10	0	0	0	0	0	0	0	0	0	0	0	0	0	0
1413	2	19511111	6	64	154	101.5	94	0	0.1		1	0.25	173	1.25	0	0	13	1	0	0	0	0	0	0	0	0	0	0	0	0	0	31	2	0	0	0	0	0	0	0	0	0	0	0	0	0
1414	2	19540815	18	70	167.5	103.5	95	0.3	0.22		-1.25	0.25	143	-0.5	0.25	42	47	5	2	2	0	0	1	0	0	0	0	1	0	0	0	53	3	2	2	4	0	2	0	0	0	0	3	0	2	0
1415	2	19570405	15	67	159	99	98	0.2	0.28		-1.25	0.25	35	-1.5	0.25	29	53	6	2	2	0	0	0	0	0	0	0	3	0	2	0	47	5	2	2	2	0	0	0	0	0	0	3	0	2	0
1416	1	19600221	13	81	162	106	98	1.1	1.1	myopic	-5.25	0.5	158	-9	0.5	175	10	0	0	0	0	0	0	0	0	0	0	0	0	0	0	20	2	0	0	0	0	0	0	0	0	0	0	0	0	0
1417	1	19590112	7	57	159.5	91	84	0.02	0.04		0.5	0.25	32	0.75	0	0	20	2	0	0	0	0	0	0	0	0	0	0	0	0	0	10	0	0	0	0	0	0	0	0	0	0	0	0	0	0
1418	2	19531210	10	54	149	90.5	95.5	0.1	1.1		-1	0.5	173	-4	0.5	31	31	2	0	0	0	0	0	0	0	0	0	0	0	0	0	13	1	0	0	0	0	0	0	0	0	0	0	0	0	0
1419	2	19500930	10	85	155	116	114	0.26	0.1		0	1.75	8	1.5	-2.25	90	37	2	2	0	0	0	0	0	0	0	0	0	0	0	0	10	0	0	0	0	0	0	0	0	0	0	0	0	0	0
1420	2	19621124	4	69	158	100	94	0.1	0.1		-1.25	0.25	43	-1.75	0.75	93	20	2	0	0	0	0	0	0	0	0	0	0	0	0	0	10	0	0	0	0	0	0	0	0	0	0	0	0	0	0
1421	1	19581030	5	70	159.5	106	91	0.2	0.22		0.5	1.25	177	1.75	0.5	168	53	5	2	2	4	0	0	0	0	0	0	0	0	0	0	53	6	2	2	3	0	0	0	0	0	0	0	0	0	0
1422	1	19440204	4	73	165	105	97	0.2	0.26		-1	0.75	106	-0.75	1	54	10	0	0	0	0	0	0	0	0	0	0	0	0	0	0	10	0	0	0	0	0	0	0	0	0	0	0	0	0	0
1423	2	19491013	4	80	159	111	111	0.1	0.02		-0.75	0.5	178	-0.5	0.75	9	37	2	2	0	0	0	0	0	0	0	0	0	0	0	0	37	2	2	0	0	0	0	0	0	0	0	0	0	0	0
1424	2	19620227	7	60	152.5	100	87	0.1	0.08		0	0.5	19	-0.25	0.75	155	10	0	0	0	0	0	0	0	0	0	0	0	0	0	0	10	0	0	0	0	0	0	0	0	0	0	0	0	0	0
1425	1	19420909	2	74	170	99	93	0.1	0.1		1	0.5	16	-0.5	0.5	131	10	0	0	0	0	0	0	0	0	0	0	0	0	0	0	10	0	0	0	0	0	0	0	0	0	0	0	0	0	0
1426	2	19430516	7	82	155	116	115	0.08	0.06		0.25	0.25	19	0.25	0.5	169	10	0	0	0	0	0	0	0	0	0	0	0	0	0	0	15	2	0	0	0	0	0	0	0	0	0	0	0	0	0
1427	2	19470202	13	56	151	99	91	0.1	0.22		-0.75	1.25	6	-1.75	2.25	4	20	2	0	0	0	0	0	0	0	0	0	0	0	0	0	10	0	0	0	0	0	0	0	0	0	0	0	0	0	0
1428	1	19531102	10	78	166	105	89	-0.06	-0.08		0.5	-0.5	90	0.5	-0.25	90	15	2	0	0	0	0	0	0	0	0	0	0	0	0	0	10	0	0	0	0	0	0	0	0	0	0	0	0	0	0
1429	2	19360111	14	57	148	99	99	0.4	0.3		-1	1.75	11	0.5	1	12	10	0	0	0	0	0	0	0	0	0	0	0	0	0	0	10	0	0	0	0	0	0	0	0	0	0	0	0	0	0
1430	2	19500904	13	73	162.5	100	99	0.42	0.18		0.5	0.5	47	1	0.25	164	12	6	0	0	0	0	0	0	0	0	0	7	0	7	0	31	2	0	0	0	0	0	0	0	0	0	0	0	0	0
1431	2	19341004	3	65	151.5	104	101	0.24	0.26		1	2	169	0.75	2.5	173	37	2	2	0	0	0	0	0	0	0	0	0	0	0	0	37	2	2	0	0	0	0	0	0	0	0	0	0	0	0
1432	2	19380806	11	52	147.5	109	92	0.58	0.46		3	1	9	2.5	1.75	4	10	0	0	0	0	0	0	0	0	0	0	0	0	0	0	20	2	0	0	0	0	0	0	0	0	0	0	0	0	0
1433	1	19540402	20	88	184.5	107	101	0.1	0.06		0.5	1.5	171	0.75	1.25	175	20	2	0	0	0	0	0	0	0	0	0	0	0	0	0	37	2	2	0	0	0	0	0	0	0	0	0	0	0	0
1434	1	19480603	2	65	170	97	86	0.7	0.7	diabetic maculopathy	-0.75	3	1	-0.5	1.5	160	65	2	2	0	0	0	0	0	2	0	0	3	0	2	0	65	6	2	2	0	0	2	2	2	0	0	3	0	2	0
1435	2	19400728	8	61	148	109	104	0.42	0.46		-1.75	3.25	2	-0.75	2.5	9	10	0	0	0	0	0	0	0	0	0	0	0	0	0	0	10	0	0	0	0	0	0	0	0	0	0	0	0	0	0
1436	1	19601207	11	69	166	99	89	0.48	0.7		3	0	0	1.25	2.75	81	53	6	2	2	2	0	0	0	0	0	0	3	0	3	0	43	3	2	2	0	0	0	0	0	0	0	3	0	2	0
1437	2	19361004	27	53	154	97	92	0.4	0.38		1.5	1	40	1.5	1.5	100	88	8	8	8	8	8	8	8	8	8	8	8	8	8	8	88	8	8	8	8	8	8	8	8	8	8	8	8	8	8
1438	1	19550926	8	82	174	109	94	0.02	-0.04		0.25	1.25	177	0	0.75	20	31	2	0	0	0	0	0	0	0	0	0	0	0	0	0	20	2	0	0	0	0	0	0	0	0	0	0	0	0	0
1439	2	19380708	20	54	142	96	89	0.48	1.32		1.25	1.5	100	2	2	48	37	2	2	0	0	0	0	0	0	0	0	0	0	0	0	88	8	8	8	8	8	8	8	8	8	8	8	8	8	8
1440	2	19460222	12	56	158	91.5	89	0.1	0.1		-0.5	1	13	-1	1.25	171	37	2	0	2	0	0	0	0	0	0	0	0	0	0	0	43	4	0	2	0	0	0	0	0	0	0	0	0	0	0
1441	1	19490615	6	68	165.5	106.5	93	0.28	0.22		-2.75	2.25	179	-2.75	2.25	178	31	2	0	0	0	0	0	0	0	0	0	0	0	0	0	37	2	2	0	0	0	0	0	0	0	0	0	0	0	0
1443	2	19401112	12	71	158	103	102	0.1	0.1		1	1	12	1	1	4	37	2	1	2	0	0	0	0	0	0	0	0	0	0	0	37	2	2	0	0	0	0	0	0	0	0	0	0	0	0
1444	1	19290302	10	78	171.5	116	94	1.1	0.6	myopic	-3.5	1.75	165	-4.25	2	15
1445	2	19350418	10	60	147	106	100	0.44	0.48		1.75	1.25	175	1.25	0.75	14	53	2	0	2	4	0	0	0	0	0	0	0	0	0	0	53	2	2	0	4	0	0	0	0	0	0	0	0	0	0
1446	1	19690808	1	70	170.5	100	90	0	-0.04		0.25	0.5	1	0	0.25	1	10	0	0	0	0	0	0	0	0	0	0	0	0	0	0	20	2	0	0	0	0	0	0	0	0	0	0	0	0	0
1447	2	19300716	10	58	142	102	95	0.8	0.48		-5.25	2.75	5	-3.25	3.25	175	88	8	8	8	8	8	8	8	8	8	8	8	8	8	8	37	2	2	0	0	0	0	0	0	0	0	0	0	0	0
1448	1	19500124	7	75	169.5	101	99.5	0.2	0.2		-3	3	2	-2.25	2	176	20	2	0	0	0	0	0	0	0	0	0	0	0	0	0	10	0	0	0	0	0	0	0	0	0	0	0	0	0	0
1449	1	19640228	7	79	164	108	88	0.5	-0.02		-2	0.25	156	-1	0.25	117	10	0	0	0	0	0	0	0	0	0	0	0	0	0	0	37	2	2	0	0	0	0	0	0	0	0	0	0	0	0
1450	2	19560118	0	75	157	110	104.5	0.38	0.54		-0.5	-0.75	73	-0.5	-1.5	85	20	2	0	0	0	0	0	0	0	0	0	0	0	0	0	20	0	0	0	0	0	0	0	0	0	0	0	0	0	0
1451	1	19560105	10	76	167	107	92	-0.08	-0.04		-0.25	0.75	173	-0.25	0.75	3	37	2	0	2	0	0	0	0	0	0	0	0	0	0	0	37	2	0	2	0	0	0	0	0	0	0	0	0	0	0
1452	2	19590920	0	60	158	99	93	0.7	0.7	myopic	-5.5	0.75	152	-6.25	0.5	81	20	2	0	0	0	0	0	0	0	0	0	0	0	0	0	20	2	0	0	0	0	0	0	0	0	0	0	0	0	0
1453	2	19721105	3	60	162.5	95	91	0.18	0.06		-0.75	0	0	-0.75	0	0	10	0	0	0	0	0	0	0	0	0	0	0	0	0	0	20	2	0	0	0	0	0	0	0	0	0	0	0	0	0
1454	2	19470406	0	61	157.5	102	93	0.52	0.54	myopic	-1.25	-1.75	99	-2.25	-1.75	88	10	0	0	0	0	0	0	0	0	0	0	0	0	0	0	10	0	0	0	0	0	0	0	0	0	0	0	0	0	0
1455	1	19710802	6	75	167	108	95	0.8	0.8	myopic	-5.25	-0.75	59	-5.5	-0.5	106	10	0	0	0	0	0	0	0	0	0	0	0	0	0	0	10	0	0	0	0	0	0	0	0	0	0	0	0	0	0
1456	2	19541012	1	68	154	101	100	0.2	0.14		2	-1.25	95	1	-1.5	75	10	0	0	0	0	0	0	0	0	0	0	0	0	0	0	10	0	0	0	0	0	0	0	0	0	0	0	0	0	0
1457	1	19530424	0	80	175	106	91	0.12	0.1		0.75	-0.5	76	0.75	-1.25	118	10	0	0	0	0	0	0	0	0	0	0	0	0	0	0	10	0	0	0	0	0	0	0	0	0	0	0	0	0	0
1458	1	19491126	5	64	167	103	91	0.56	0.04		1.5	-3	77	1.75	-2.5	101	88	8	8	8	8	8	8	8	8	8	8	8	8	8	8	88	8	8	8	8	8	8	8	8	8	8	8	8	8	8
1459	1	19571110	17	75	168	101	89	0.34	0.34		2.5	0.75	174	1.5	0.5	5	37	2	0	2	1	0	0	0	0	0	0	0	0	0	0	37	2	2	0	0	0	0	0	0	0	0	0	0	0	0
1460	2	19521001	5	74	164	109	105	0.1	0.1		0.5	-0.25	76	0.75	-0.5	119	20	2	0	0	0	0	0	0	0	0	0	0	0	0	0	10	0	0	0	0	0	0	0	0	0	0	0	0	0	0
1461	2	19470428	17	67	155	105	97	0.14	0.22		2.5	-1.25	99	2.5	-1	87	37	2	2	0	0	0	0	0	0	0	0	0	0	0	0	37	2	2	0	0	0	0	0	0	0	0	0	0	0	0
1462	2	19530104	7	54	147.5	101	91	0.56	1.26	diabetic maculopathy	0	-2.25	86	0.25	-3.5	85	53	6	2	0	0	0	0	0	0	0	0	3	0	3	0	53	6	2	0	0	0	0	0	0	0	0	3	0	2	0
1463	1	19560826	10	87	171	112	106.5	0.38	-0.04		0	-0.5	95	0	-0.25	9	71	2	2	0	0	0	0	3	3	4	0	3	0	2	0	65	2	2	2	4	0	0	0	2	0	0	2	0	0	0
1464	1	19560603	3	66	170	105	86	0.26	0.36		0	-2	77	-1	-0.75	111	10	0	0	0	0	0	0	0	0	0	0	0	0	0	0	20	2	0	0	0	0	0	0	0	0	0	0	0	0	0
1465	2	19631210	4	62	154.5	94	95	-0.1	-0.1		0.5	-0.5	100	0.5	-0.25	57	10	0	0	0	0	0	0	0	0	0	0	0	0	0	0	20	2	0	0	0	0	0	0	0	0	0	0	0	0	0
1466	2	19550702	2	63	150.5	105	98	0.24	0.3		1.5	0	0	2.25	-0.5	99	10	0	0	0	0	0	0	0	0	0	0	0	0	0	0	10	0	0	0	0	0	0	0	0	0	0	0	0	0	0
1467	2	19590314	3	65	165.5	96.5	96	0	0		0.5	-0.75	42	0.75	-0.75	117	31	2	0	0	0	0	0	0	0	0	0	0	0	0	0	15	2	0	0	0	0	0	0	0	0	0	0	0	0	0
1468	1	19440124	25	79	163	107	96	0.32	1.54		1.25	-3.25	88	0.75	-2	64	37	2	2	2	0	0	0	0	0	0	0	0	0	0	0	53	6	2	2	2	0	0	0	0	0	0	3	0	2	0
1470	2	19510430	5	73	147	110.5	105	1.1	1.1	myopic	-5.5	-0.75	105	-7	-0.25	179	10	0	0	0	0	0	0	0	0	0	0	0	0	0	0	13	1	0	0	0	0	0	0	0	0	0	0	0	0	0
1471	1	19490924	6	80	169.5	109	98	0.1	0.06		0.5	-0.75	64	0.5	-0.5	150	10	0	0	0	0	0	0	0	0	0	0	0	0	0	0	37	2	0	2	0	0	0	0	0	0	0	0	0	0	0
1472	2	19521202	7	63	161.5	102.5	92	1.1	1.1	myopic	-8.25	-1	84	-10.25	-1	56	15	2	0	0	0	0	0	0	0	0	0	0	0	0	0	20	2	0	0	0	0	0	0	0	0	0	0	0	0	0
1473	2	19610803	4	71	159	107	91	0.1	0.32		0.5	-1	87	0.5	-2	85	43	3	2	2	1	0	0	0	0	0	0	0	0	0	0	37	2	2	2	0	0	0	0	0	0	0	0	0	0	0
1474	1	19471122	8	67	163	102.5	89.5	1.1	1.1	myopic maculopathy	-16.5	-2.5	91	-10.75	-2	101	10	0	0	0	0	0	0	0	0	0	0	0	0	0	0	10	0	0	0	0	0	0	0	0	0	0	0	0	0	0
1475	2	19500308	1	78	163.5	107	99	0.6	0		0	-1.25	75	0	-0.75	90	12	2	0	0	0	0	0	0	0	0	0	0	2	0	0	10	0	0	0	0	0	0	0	0	0	0	0	0	0	0
1476	2	19500909	2	88	165	117	107	1.1	1.1	myopic	-3.5	-1.5	110	-2	-1.25	84	10	0	0	0	0	0	0	0	0	0	0	0	0	0	0	15	2	0	0	0	0	0	0	0	0	0	0	0	0	0
1477	2	19520924	2	62	161	101	89.5	0.12	0.2		-0.5	0	0	-0.5	-0.25	121	37	2	2	2	0	0	0	0	0	0	0	0	0	0	0	31	2	0	0	0	0	0	0	0	0	0	0	0	0	0
1478	2	19320310	6	59	148.5	102	95	0.62	1.1	myopic	3.25	-1.25	71	0.25	-1.25	108	37	2	2	0	0	0	0	0	0	0	0	0	0	0	0	88	8	8	8	8	8	8	8	8	8	8	8	8	8	8
1479	1	19500520	25	81	169.5	109	95	0.2	0.2		0.5	-2.75	87	0	-2.5	96	64	2	2	0	4	2	0	0	0	0	0	0	7	0	0	64	2	2	0	0	0	0	0	0	0	0	3	7	2	2
1480	1	19340102	5	72	153.5	106	106	0.32	0.32		2.5	-3.5	93	2.5	-2.75	92	88	8	8	8	8	8	8	8	8	8	8	8	8	8	8	10	0	0	0	0	0	0	0	0	0	0	0	0	0	0
1481	1	19520224	10	72	169	96	90	0.2	0.24		2.75	-1.25	90	2.25	-1	90	43	4	2	2	1	0	0	0	0	0	0	3	0	2	0	47	3	2	2	0	0	0	0	0	0	0	3	0	3	0
1482	2	19440223	19	41	153	82.5	81.5	1.1	0.7	cataract	-4.25	-5.25	71	-2.5	-1.75	158	88	8	8	8	8	8	8	8	8	8	8	8	8	8	8	88	8	8	8	8	8	8	8	8	8	8	8	8	8	8
1483	2	19400724	0	58	149.5	93.5	97.5	0.26	0.36		3.25	-1.5	89	3.25	-1.25	94	31	2	0	0	0	0	0	0	0	0	0	0	0	0	0	10	0	0	0	0	0	0	0	0	0	0	0	0	0	0
1484	1	19530610	4	87	172	105	107	0.04	0.12		2	-2	96	2	-2	96	31	2	0	0	0	0	0	0	0	0	0	0	0	0	0	15	2	0	0	0	0	0	0	0	0	0	0	0	0	0
1485	2	19361225	9	63	149	102.5	99.5	0.48	0.08		0.75	-1.75	97	1.5	-1.75	92	47	3	2	0	0	0	2	0	0	0	0	3	0	2	0	43	4	2	0	0	0	0	0	0	0	0	2	0	0	0
1486	2	19640608	6	55	154	89	81	0.1	0.22		0	-1	95	-0.75	-0.75	17	37	2	2	0	0	0	0	0	0	0	0	0	0	0	0	31	2	0	0	0	0	0	0	0	0	0	0	0	0	0
1487	1	19331128	10	67	159	108	99	0.36	0.2		-0.5	-1	14	0	0.75	179	15	2	0	0	0	0	0	0	0	0	0	0	0	0	0	31	2	0	0	0	0	0	0	0	0	0	0	0	0	0
1488	2	19451023	15	50	151	98	90	1.7	1.7	myopic	-10.75	-2.75	83	-3.25	-0.25	59	88	8	8	8	8	8	8	8	8	8	8	8	8	8	8	88	8	8	8	8	8	8	8	8	8	8	8	8	8	8
1489	2	19520728	2	65	163	100	92	-0.08	-0.1		1.25	-1	55	1	-0.75	106	10	0	0	0	0	0	0	0	0	0	0	0	0	0	0	10	0	0	0	0	0	0	0	0	0	0	0	0	0	0
1490	1	19630115	2	91	176	113	107	0	1.7		0	-0.5	177	6	-1.25	3	10	0	0	0	0	0	0	0	0	0	0	0	0	0	0	10	0	0	0	0	0	0	0	0	0	0	0	0	0	0
1491	1	19670408	11	74	166.5	101	90	1.7	1.7	myopic	-3.5	0	0	-4	0	0	15	2	0	0	0	0	0	0	0	0	0	0	0	0	0	20	2	0	0	0	0	0	0	0	0	0	0	0	0	0
1492	2	19480119	20	51	152	95.5	94.5	0.6	0.4		1	-2.25	70	0	-1.75	109	71	2	8	8	8	8	8	0	8	2	3	8	0	8	0	65	2	2	0	0	0	0	0	0	0	0	0	0	0	0
1493	2	19580202	12	62	154	97	94	0.42	0.52		-0.5	-1.5	75	0.25	-3.25	90	10	0	0	0	0	0	0	0	0	0	0	0	0	0	0	10	0	0	0	0	0	0	0	0	0	0	0	0	0	0
1494	1	19600819	7	78	172	107	89	0.66	0.64	myopic	-1	-4	93	-1.75	-4	107	10	0	0	0	0	0	0	0	0	0	0	0	0	0	0	10	0	0	0	0	0	0	0	0	0	0	0	0	0	0
1495	2	19350427	2	56	155	104	88.5	1.7	0.3					1.25	-1.75	82	88	8	8	8	8	8	8	8	8	8	8	8	8	8	8	37	2	2	0	0	0	0	0	0	0	0	0	0	0	0
1496	2	19520704	4	60.5	151	93	91	0.52	0.46		1	-5	92	1	-4.75	97	10	0	0	0	0	0	0	0	0	0	0	0	0	0	0	10	0	0	0	0	0	0	0	0	0	0	0	0	0	0
1497	2	19470426	16	63	153	104	98.5	0.18	0.86		-1.75	0	0	-3.75	-2	71	88	8	8	8	8	8	8	8	8	8	8	8	8	8	8	88	8	8	8	8	8	8	8	8	8	8	8	8	8	8
1498	2	19500320	21	55	146	98	93	0.5	0.4		-1	-0.75	109	-0.75	-0.5	84	88	8	8	8	8	8	8	8	8	8	8	8	8	8	8	88	8	8	8	8	8	8	8	8	8	8	8	8	8	8
1499	1	19560510	20	81	176	108	91	0.66	0.16		0	-0.5	127	1.25	1	171	43	4	2	2	8	0	8	0	0	0	0	3	0	2	0	47	5	2	2	0	0	0	0	0	0	0	1	0	0	0
1500	1	19760620	2	105	183	115	108	-0.1	-0.1		-0.75	-0.75	74	-0.5	-0.5	91	15	2	0	0	0	0	0	0	0	0	0	0	0	0	0	10	0	0	0	0	0	0	0	0	0	0	0	0	0	0
1501	2	19360103	5	69	154	102	110	1.7	0.7	myopic	-6	-2.75	95	-5	-2.25	75	10	0	0	0	0	0	0	0	0	0	0	0	0	0	0	20	2	0	0	0	0	0	0	0	0	0	0	0	0	0
1502	1	19530809	13	90	175	106	104	0	0		0.75	0.25	149	0.25	0.5	67	37	2	2	0	0	0	0	0	0	0	0	0	0	0	0	37	2	2	0	0	0	0	0	0	0	0	0	0	0	0
1503	2	19530317	3	71	157.5	102	95	0.06	0.06		0.5	0.5	155	0.5	0.25	17	10	0	0	0	0	0	0	0	0	0	0	0	0	0	0	10	0	0	0	0	0	0	0	0	0	0	0	0	0	0
1504	2	19530728	0	71	157.5	106.5	104	0.08	0.22		1.25	0.75	170	1	1.25	2	10	0	0	0	0	0	0	0	0	0	0	0	0	0	0	31	2	0	0	0	0	0	0	0	0	0	0	0	0	0
1505	1	19621204	7	83.5	167	109	98	0.1	0.4		0	-0.5	8	-2	-0.75	1	31	2	0	0	0	0	0	0	0	0	0	0	0	0	0	20	2	0	0	0	0	0	0	0	0	0	0	0	0	0
1506	1	19430529	8	68	157	106	96	0.66	0.58	myopic	-2.25	-0.75	64	-2.5	-1.25	122	20	2	0	0	0	0	0	0	0	0	0	0	0	0	0	20	2	0	0	0	0	0	0	0	0	0	0	0	0	0
1507	1	19511222	6	64	167	105	87	0.12	0.1		0	0.5	77	0.25	0.75	173	20	2	0	0	0	0	0	0	0	0	0	0	0	0	0	20	2	0	0	0	0	0	0	0	0	0	0	0	0	0
1508	2	19330514	12	62	151	107	105	0.32	0.1		1.5	-2.25	104	0	-0.25	80	37	2	2	0	0	0	0	0	0	0	0	0	0	0	0	43	3	2	0	0	0	0	0	0	0	0	3	0	2	0
1509	2	19480814	5	80	158	113	110	0.1	0.1		0	0.5	167	0	0.75	178	20	2	0	0	0	0	0	0	0	0	0	0	0	0	0	20	2	0	0	0	0	0	0	0	0	0	0	0	0	0
1510	1	19420117	5	67	161	102	95	1.7	0.4		-5	0	0	-2.25	-1.5	118	88	8	8	8	8	8	8	8	8	8	8	8	8	8	8	20	2	0	0	0	0	0	0	0	0	0	0	0	0	0
1511	2	19600823	1	73	162	105	106	0.2	0.1		-0.75	-0.75	50	-0.25	-0.75	98	20	2	0	0	0	0	0	0	0	0	0	0	0	0	0	31	2	0	0	0	0	0	0	0	0	0	0	0	0	0
1512	2	19520623	11	68	158	103	99	0.18	0.16		0	1.5	173	0	1.25	13	37	2	0	2	0	0	0	0	0	0	0	0	0	0	0	37	2	2	0	0	0	0	0	0	0	0	3	0	2	0
1513	1	19540602	9	80	167.5	111	103	0.24	0.2		0.5	-2	89	0	-1.25	85	43	2	0	2	2	0	0	0	0	0	0	1	0	0	0	43	2	0	2	2	0	0	0	0	0	0	0	0	0	0
1514	2	19530504	1	66	151	101	93	0.06	0.1		1	0.25	121	1.25	0.25	36	20	2	0	0	0	0	0	0	0	0	0	0	0	0	0	20	2	0	0	0	0	0	0	0	0	0	0	0	0	0
1515	2	19480827	7	68	151.5	101	97	0.46	0.3		1.25	-3	85	0	-1.75	89	20	2	0	0	0	0	0	0	0	0	0	0	0	0	0	20	2	0	0	0	0	0	0	0	0	0	0	0	0	0
1516	2	19601013	3	66	168	97	95.5	1.7	0.98	myopic	-10.5	-2.25	161	-7.25	-1.5	49	10	0	0	0	0	0	0	0	0	0	0	0	0	0	0	20	2	0	0	0	0	0	0	0	0	0	0	0	0	0
1517	2	19411213	10	64	153.5	96	99	0.2	0.5		1.25	1.25	175	0.75	2.25	17	37	2	2	0	0	0	0	0	0	0	0	0	0	0	0	37	2	2	0	0	0	0	0	0	0	0	0	0	0	0
1518	1	19540315	2	96	174	111	103	0.02	-0.08		0.25	0.75	179	0.5	0.5	1	10	0	0	0	0	0	0	0	0	0	0	0	0	0	0	31	2	0	0	0	0	0	0	0	0	0	0	0	0	0
1519	1	19610806	14	58	165	99.5	88	0.24	0.6		-3.25	-1	171	-5.75	-0.25	18	37	2	0	2	0	0	0	0	0	0	0	0	0	0	0	15	2	0	0	0	0	0	0	0	0	0	0	0	0	0
1520	2	19561204	5	55	157	92	80	0.1	0.1		1	1	7	1	1.25	11	31	2	0	0	0	0	0	0	0	0	0	0	0	0	0	37	2	2	0	1	0	0	0	0	0	0	0	0	0	0
1521	1	19561215	1	65	162.5	101	86	0.1	0		0.25	0.5	38	0.5	0.25	135	10	0	0	0	0	0	0	0	0	0	0	0	0	0	0	10	0	0	0	0	0	0	0	0	0	0	0	0	0	0
1522	1	19411202	7	74	170.5	109.5	99	0.1	0.1		0.5	0.75	11	0.5	1	162	15	2	0	0	0	0	0	0	0	0	0	0	0	0	0	15	2	0	0	0	0	0	0	0	0	0	0	0	0	0
1523	2	19441022	7	81	165	111	106	1.7	0.2					0.75	-2.25	86																20	2	0	0	0	0	0	0	0	0	0	0	0	0	0
1524	2	19571205	3	65	161	100	97	0.08	0		0.25	-1.25	14	0	0.5	85	10	0	0	0	0	0	0	0	0	0	0	0	0	0	0	20	2	0	0	0	0	0	0	0	0	0	0	0	0	0
1525	1	19590518	4	74	171	105	91	0.1	0.1		0	-1.25	82	0.5	-1.5	83	20	2	0	0	0	0	0	0	0	0	0	0	0	0	0	10	0	0	0	0	0	0	0	0	0	0	0	0	0	0
1526	1	19580201	0	70	173.5	106	88.5	0	0.02		0.25	-0.5	78	-0.25	-0.25	69	20	2	0	0	0	0	0	0	0	0	0	0	0	0	0	10	0	0	0	0	0	0	0	0	0	0	0	0	0	0
1527	2	19581218	4	98	153	115	117	0.38	0.22		0.25	1.25	155	0.5	1.25	18	10	0	0	0	0	0	0	0	0	0	0	0	0	0	0	10	0	0	0	0	0	0	0	0	0	0	0	0	0	0
1528	1	19581218	7	66	170	97.5	91	0.12	0		0.5	-1.5	83	0.75	-1.5	104	20	2	0	0	0	0	0	0	0	0	0	0	0	0	0	20	2	0	0	0	0	0	0	0	0	0	0	0	0	0
1529	2	19520916	12	56	154	95.5	94	0	0		0	0.5	179	0.25	0.5	10	10	0	0	0	0	0	0	0	0	0	0	0	0	0	0	20	2	0	0	0	0	0	0	0	0	0	0	0	0	0
1530	2	19530604	10	53	156	99	82	1.14	0.28		0.75	-2.25	89	1.25	-1.75	84	43	2	2	0	2	0	0	0	0	0	0	0	0	0	0	37	2	2	0	0	0	0	0	0	0	0	0	0	0	0
1531	2	19350224	10	78	162	108	109	0.44	0.3		-0.25	-1.25	93	0.75	-1.75	109	88	8	8	8	8	8	8	8	8	8	8	8	8	8	8	31	2	0	0	0	0	0	0	0	0	0	0	0	0	0
1533	2	19390419	5	72.5	157	103.5	106.5	0.46	0.4		2.25	1.75	178	2.25	1.75	1	10	0	0	0	0	0	0	0	0	0	0	0	0	0	0	10	0	0	0	0	0	0	0	0	0	0	0	0	0	0
1534	2	19370803	1	67	151	109	100	0.42	0.58		1	0.75	179	2	1	157	12	2	2	0	0	0	0	0	0	0	0	7	2	7	0	12	2	2	0	0	0	0	0	0	0	0	7	2	7	0
1535	2	19451123	8	51	146	97	85	0.38	0.32		1	1.75	173	1	1.75	11	31	2	0	0	0	0	0	0	0	0	0	0	0	0	0	20	2	0	0	0	0	0	0	0	0	0	0	0	0	0
1536	2	19510715	2	71	153	102	104	0.1	0.3		0.5	-1	95	0.5	-1.5	98	20	2	0	0	0	0	0	0	0	0	0	0	0	0	0	10	0	0	0	0	0	0	0	0	0	0	0	0	0	0
1537	1	19541004	2	71	166.5	97	87	0.2	0.3		1.75	0.25	149	1.5	0.5	5	37	2	2	0	0	0	0	0	0	0	0	0	0	0	0	31	2	0	0	0	0	0	0	0	0	0	0	0	0	0
1538	1	19470703	1	68	164.5	107	93	0.14	0.02		1	1.25	2	0.25	1.25	180	20	2	0	0	0	0	0	0	0	0	0	0	0	0	0	10	0	0	0	0	0	0	0	0	0	0	0	0	0	0
1539	2	19540411	4	70	164	103	97	0.1	0.08		0.25	-1.25	75	1.75	-2.25	99	20	2	0	0	0	0	0	0	0	0	0	0	0	0	0
1540	1	19380908	1	64	151.5	105	95	0.32	1.7		0.75	0.5	12	-5.25	-1	96	88	8	8	8	8	8	8	8	8	8	8	8	8	8	8	88	8	8	8	8	8	8	8	8	8	8	8	8	8	8
1541	1	19570203	3	77	165	105	90	0.4	0.2		-0.25	-0.5	137	-0.25	-0.25	68	53	6	2	2	4	0	0	0	0	0	0	3	0	2	0	53	5	2	2	2	0	2	0	0	0	0	3	0	2	0
1542	1	19630106	5	73	156	110	90	1.1	1.1	myopic	0.75	-1.5	78	0.25	-1	95	37	2	2	0	1	0	0	0	0	0	0	0	0	0	0	43	2	0	0	2	0	0	0	0	0	0	0	0	0	0
1543	1	19630519	1	53	167.5	95	85.5	-0.06	-0.1		0	0.5	3	0	0.75	167	13	1	0	0	0	0	0	0	0	0	0	0	0	0	0	10	0	0	0	0	0	0	0	0	0	0	0	0	0	0
1544	1	19440830	17	80	160	116	106	0.36	0		-0.5	-0.5	118	0.25	-0.75	73	31	2	0	0	0	0	0	0	0	0	0	0	0	0	0	37	2	0	2	0	0	0	0	0	0	0	0	0	0	0
1545	1	19571016	1	75	174	110	94	-0.06	-0.1		0.25	-0.75	75	0	0.25	55	13	1	0	0	0	0	0	0	0	0	0	0	0	0	0	31	2	0	0	0	0	0	0	0	0	0	0	0	0	0
1546	1	19530213	11	65	165.5	95.5	90.5	0	0.04		0.25	1	2	0.25	0.75	168	10	0	0	0	0	0	0	0	0	0	0	0	0	0	0	10	0	0	0	0	0	0	0	0	0	0	0	0	0	0
1547	1	19720416	6	86	168	105	95.5	0.4	0.42		-2.5	-0.25	98	-1.75	-0.75	69	37	2	0	2	0	0	0	0	0	0	0	0	0	0	0	43	2	0	2	2	0	0	0	0	0	0	0	0	0	0
1548	2	19350328	4	73	163	113	104	0.2	0.22		1.25	0.25	13	0	2.75	178	10	0	0	0	0	0	0	0	0	0	0	0	0	0	0	10	0	0	0	0	0	0	0	0	0	0	0	0	0	0
1549	2	19460629	8	70	155.5	108.5	102	0.4	0.4		3	1	7	2.5	0.75	180	10	0	0	0	0	0	0	0	0	0	0	0	0	0	0	10	0	0	0	0	0	0	0	0	0	0	0	0	0	0
1550	2	19340222	20	70	150	112	106	0.46	0.84		0.25	1.5	112	0.75	-1	123	37	2	2	0	0	0	0	0	0	0	0	1	0	0	0	37	2	2	0	0	0	0	0	0	0	0	3	0	2	0
1551	2	19340510	4	63	147	109	95	0.3	0.42		0	0.5	21	2	-2.5	102	10	0	0	0	0	0	0	0	0	0	0	0	0	0	0	10	0	0	0	0	0	0	0	0	0	0	0	0	0	0
1552	1	19561111	3	76	160	110	101	0.02	0.1		0.5	0.25	172	0	1.5	28	13	0	1	0	0	0	0	0	0	0	0	0	0	0	0	13	0	1	0	0	0	0	0	0	0	0	0	0	0	0
1553	2	19470724	7	78	153	114	106	0.3	0.2		1	1.75	169	1	1.25	178	10	0	0	0	0	0	0	0	0	0	0	0	0	0	0	10	0	0	0	0	0	0	0	0	0	0	0	0	0	0
1554	1	19460128	7	92	170	112	119	-0.1	-0.06		0	0.75	175	0.25	0	0	20	2	0	0	0	0	0	0	0	0	0	0	0	0	0	10	0	0	0	0	0	0	0	0	0	0	0	0	0	0
1555	2	19441105	15	64	155	100	95	0.4	0.5		0.75	0.25	145	0.25	1.25	39	15	2	0	0	0	0	0	0	0	0	0	0	0	0	0	88	8	8	8	8	8	8	8	8	8	8	8	8	8	8
1556	2	19350117	20	59	161.5	102	97	0.5	0.1		-0.75	-0.75	79	1	-1.25	112	15	2	0	0	0	0	0	0	0	0	0	0	0	0	0	37	2	2	0	0	0	0	0	0	0	0	0	0	0	0
1557	2	19610708	6	73	156	112	97	0.1	0.1		-0.5	-0.75	78	0	-1.25	101
1558	1	19460419	21	84	163	108	112	0.08	0.4		0.25	-0.75	102	1.5	-2.75	86	37	2	2	0	0	0	0	0	0	0	0	0	0	0	0	37	2	2	0	0	0	0	0	0	0	0	0	0	0	0
1559	1	19391209	2	67	165.5	105.5	91	0.52	0.96	cataract	-1	-1	83	0	-7.25	95	88	8	8	8	8	8	8	8	8	8	8	8	8	8	8	88	8	8	8	8	8	8	8	8	8	8	8	8	8	8
1560	1	19630115	14	76	170	103	92	0.3	0.02		-1.5	-1	11	0.5	-0.75	99	37	2	2	0	0	0	0	0	0	0	0	0	0	0	0	53	6	2	0	0	0	0	0	0	0	0	0	0	0	0
1561	1	19500617	5	67	163	94	90	0.22	0.2		0.75	-2	81	1	-2	99	10	0	0	0	0	0	0	0	0	0	0	0	0	0	0	14	0	0	2	0	0	0	0	0	0	0	0	0	0	0
1562	2	19500216	2	73	149	111	109	0	0		0	-0.5	76	0	-0.25	131	88	8	8	8	8	8	8	8	8	8	8	8	8	8	8	88	8	8	8	8	8	8	8	8	8	8	8	8	8	8
1563	1	19511128	1	86	165	110	104	0.1	0.22		0.25	-1.5	85	0.25	-2.5	121	10	0	0	0	0	0	0	0	0	0	0	0	0	0	0	12	2	0	0	0	0	0	0	0	0	0	0	0	0	0
1564	1	19530811	14	67	166	99.5	88	0.1	0		0.25	-1	86	0	-0.5	126	37	2	2	2	0	0	0	0	0	0	0	0	0	0	0	43	2	0	2	2	0	0	0	0	0	0	0	0	0	0
1565	1	19500222	1	67	168.5	99	92	0	0.3		0	0.25	116	1.25	-5.5	20	10	0	0	0	0	0	0	0	0	0	0	0	0	0	0	10	0	0	0	0	0	0	0	0	0	0	0	0	0	0
1566	2	19450512	3	66	159.5	104.5	85.5	-0.04	0.02		0.75	0.5	96	1	0.25	13	10	0	0	0	0	0	0	0	0	0	0	0	0	0	0	10	0	0	0	0	0	0	0	0	0	0	0	0	0	0
1567	1	19540123	0	93	171.5	105.5	104.5	-0.02	-0.1		1	-1	87	0.75	-0.75	90	10	0	0	0	0	0	0	0	0	0	0	0	0	0	0	10	0	0	0	0	0	0	0	0	0	0	0	0	0	0
1568	1	19481224	10	85	165	117	98.5	-0.02	-0.06		0	0.75	65	0.5	0.25	20	10	0	0	0	0	0	0	0	0	0	0	0	0	0	0	10	0	0	0	0	0	0	0	0	0	0	0	0	0	0
1569	1	19401108	10	86	176.5	112	100	0.3	0.04		0.75	3	10	0.75	1.25	177	10	0	0	0	0	0	0	0	0	0	0	0	0	0	0	20	2	0	0	0	0	0	0	0	0	0	0	0	0	0
1570	2	19530326	6	75	161.5	111	105	0	-0.06		0.5	0.5	147	0.5	0.5	11	20	2	0	0	0	0	0	0	0	0	0	0	0	0	0	37	2	2	0	0	0	0	0	0	0	0	0	0	0	0
1571	1	19580315	7	89	174	111	99	0.12	0.1		0.5	1.75	3	0.75	0.75	8	10	0	0	0	0	0	0	0	0	0	0	0	0	0	0	20	2	0	0	0	0	0	0	0	0	0	0	0	0	0
1572	1	19400903	10	57	157	103	89	0	0.04		0.5	1.75	3	0.25	2	175	20	2	0	0	0	0	0	0	0	0	0	0	0	0	0	15	2	0	0	0	0	0	0	0	0	0	0	0	0	0
1573	1	19540831	17	66	159.5	101	94.5	0.3	0.22		-0.75	-0.5	82	-0.75	-0.5	112	37	2	2	0	0	0	0	0	0	0	0	0	0	0	0	37	2	2	0	0	0	0	0	0	0	0	0	0	0	0
1574	2	19271129	2	56	140	103	93	0.46	0.56		1.25	-2.25	47	0.25	0.5	58	88	8	8	8	8	8	8	8	8	8	8	8	8	8	8	88	8	8	8	8	8	8	8	8	8	8	8	8	8	8
1575	2	19571105	1	64	156.5	105	91	0.02	0.02		0.5	-0.75	88	0.75	-1	101	20	2	0	0	0	0	0	0	0	0	0	0	0	0	0	10	0	0	0	0	0	0	0	0	0	0	0	0	0	0
1576	2	19491207	1	60	156	104	92	0.62	0.62	myopic	-2.5	-0.25	52	-2	-0.75	22	10	0	0	0	0	0	0	0	0	0	0	0	0	0	0	10	0	0	0	0	0	0	0	0	0	0	0	0	0	0
1577	2	19570221	6	101	150	131	129	0.2	0.2		1.5	1.25	173	1.25	1.25	3	31	2	0	0	0	0	0	0	0	0	0	0	0	0	0	37	2	2	0	0	0	0	0	0	0	0	0	0	0	0
1578	2	19440222	2	60	154	100	98	0.6	0.62	myopic	1.5	1.5	179	1.5	2.25	170	10	0	0	0	0	0	0	0	0	0	0	0	0	0	0	10	0	0	0	0	0	0	0	0	0	0	0	0	0	0
1579	2	19490610	5	46	150.5	98	83	0.4	0.3		2	1.25	8	1	1.5	165	10	0	0	0	0	0	0	0	0	0	0	0	0	0	0	10	0	0	0	0	0	0	0	0	0	0	0	0	0	0
1580	1	19540105	6	76	161	117	109	0.04	0		0	1	174	0.25	-0.75	88	10	0	0	0	0	0	0	0	0	0	0	0	0	0	0	10	0	0	0	0	0	0	0	0	0	0	0	0	0	0
1581	1	19640506	1	52	153	93	79.5	0.32	0.26		1.25	-2.25	66	0	-1.25	143	53	6	2	2	0	0	0	0	0	0	0	3	0	2	0	53	6	2	2	1	0	0	0	0	0	0	3	0	2	0
1582	2	19481207	5	74	163	100	103	0	1.7		0.25	1.25	170	-1	-1.75	109	47	2	0	0	0	0	2	0	0	0	0	0	0	0	0	88	8	8	8	8	8	8	8	8	8	8	8	8	8	8
1583	1	19710710	0	69	172	99.5	89	0.08	0		-0.75	-0.5	168	-0.75	-0.25	20	10	0	0	0	0	0	0	0	0	0	0	0	0	0	0	15	2	0	0	0	0	0	0	0	0	0	0	0	0	0
1584	1	19531016	7	73	170	101	90.5	0	0		0.25	-0.5	4	0.75	0.25	30	20	2	0	0	0	0	0	0	0	0	0	0	0	0	0	20	2	0	0	0	0	0	0	0	0	0	0	0	0	0
1585	2	19550823	1	55.5	161.5	99	86	0.44	0.46		-1.25	-1.25	72	-1.75	-0.5	136	15	2	0	0	0	0	0	0	0	0	0	0	0	0	0	10	0	0	0	0	0	0	0	0	0	0	0	0	0	0
1586	2	19341005	17	53	141	109	104	0.1	0.7		3.25	-3.5	82	-2	-1.5	83	10	0	0	0	0	0	0	0	0	0	0	0	0	0	0	88	8	8	8	8	8	8	8	8	8	8	8	8	8	8
1587	2	19581214	5	52	160.5	95	83	0.62	0.2		-0.25	-0.75	54	0.25	-0.75	87	20	2	0	0	0	0	0	0	0	0	0	0	0	0	0	20	2	0	0	0	0	0	0	0	0	0	0	0	0	0
1588	1	19561023	12	76	171	104	92	0	0		0	0.25	170	0	0.5	25	47	5	2	2	0	0	1	0	0	0	0	1	0	0	0	37	2	2	2	0	0	0	0	0	0	0	1	0	0	0
1589	1	19500802	6	78	175	103	91	0.92	0.38		-5.5	-2	75	1	-1.5	105	10	0	0	0	0	0	0	0	0	0	0	0	0	0	0	20	2	0	0	0	0	0	0	0	0	0	0	0	0	0
1590	2	19400214	2	61	156.5	104.5	98.5	0.44	0.34		3	1.5	179	2	1.75	3	10	0	0	0	0	0	0	0	0	0	0	0	0	0	0	10	0	0	0	0	0	0	0	0	0	0	0	0	0	0
1591	2	19580217	2	57	162	95	91.5	-0.04	0		0.5	0	0	0.75	0	0	31	2	0	0	0	0	0	0	0	0	0	0	0	0	0	31	2	0	0	0	0	0	0	0	0	0	0	0	0	0
1592	1	19620304	15	85	172.5	106	96	-0.2	0.9		0.25	0.25	44	-1.25	-0.25	39	31	2	0	0	0	0	0	0	0	0	0	0	0	0	0	31	2	0	0	0	0	0	0	0	0	0	7	2	7	0
1593	1	19560502	10	91	167	119	106	0.1	0.12		0.75	0.75	165	0.5	1	24	37	2	0	2	0	0	0	0	0	0	0	0	0	0	0	14	0	0	2	0	0	0	0	0	0	0	0	0	0	0
1594	2	19440508	0	51	151.5	104	88	0.3	0.36		1.75	0.75	113	2	0	0	88	8	8	8	8	8	8	8	8	8	8	8	8	8	8	10	0	0	0	0	0	0	0	0	0	0	0	0	0	0
1595	2	19460109	15	80	156	105	108	0.4	0.56		1.25	1	166	1.75	1.75	177	31	2	0	0	0	0	0	0	0	0	0	0	0	0	0	15	2	0	0	0	0	0	0	0	0	0	0	0	0	0
1596	2	19680415	12	82	163	110	111	0.1	1		0	-0.5	72	-3.5	-1.25	88	71	2	0	0	0	0	0	1	0	0	3	8	3	8	0	63	2	2	0	0	0	0	0	0	0	0	3	3	2	0
1597	1	19470421	12	74	173.5	101	92	0.02	0.08		0.25	-1	83	0	-0.5	103	10	0	0	0	0	0	0	0	0	0	0	0	0	0	0	12	2	2	0	0	0	0	0	0	0	0	0	0	0	0
1598	2	19430110	3	80	163	111	101	0.2	0.18		0.5	-1.75	86	0.75	-1.5	103	10	0	0	0	0	0	0	0	0	0	0	0	0	0	0	10	0	0	0	0	0	0	0	0	0	0	0	0	0	0
1599	1	19610225	5	76	174.5	105	93	0	0		0	-0.5	86	0.25	-1	99	20	2	0	0	0	0	0	0	0	0	0	0	0	0	0	31	2	0	0	0	0	0	0	0	0	0	0	0	0	0
1600	1	19660512	12	81	171	107.5	97	0.2	0.1		-0.25	-0.5	27	-0.5	-0.75	171	63	2	2	0	0	0	0	0	0	0	0	0	7	0	0	75	2	2	0	0	0	0	3	0	0	3	3	7	2	2
1601	2	19620118	0	77	161	109	107	0.02	-0.1		0	0.75	14	0.5	0.75	4	10	0	0	0	0	0	0	0	0	0	0	0	0	0	0	20	2	0	0	0	0	0	0	0	0	0	0	0	0	0
1602	2	19541009	12	79	153	104	111	0.5	0.4		-1.75	-1	117	-0.5	-2.75	82	31	2	0	0	0	0	0	0	0	0	0	0	0	0	0	37	2	0	2	0	0	0	0	0	0	0	0	0	0	0
1603	2	19380214	4	53.5	149.5	95	90	0.24	0.24		0	2.75	177	0.5	-1	89	10	0	0	0	0	0	0	0	0	0	0	0	0	0	0	10	0	0	0	0	0	0	0	0	0	0	0	0	0	0
1604	1	19400306	5	64	168	101	86	0.32	0.14		1.5	-2.25	79	1.5	-2	87	10	0	0	0	0	0	0	0	0	0	0	0	0	0	0	10	0	0	0	0	0	0	0	0	0	0	0	0	0	0
1605	2	19570307	7	52	151	93	86	0.08	0.04		0.25	1	175	0.25	1	3	20	2	1	0	0	0	0	0	0	0	0	0	0	0	0	20	2	0	0	0	0	0	0	0	0	0	0	0	0	0
1606	2	19510811	3	83	160	116	113	1.7	0.6	myopic maculopathy	-23.75	-6.5	82	0.25	1.5	52	15	2	0	0	0	0	0	0	0	0	0	0	0	0	0	10	0	0	0	0	0	0	0	0	0	0	0	0	0	0
1607	2	19590228	13	61	151.5	98	92	0	0.1		0.25	0.5	1	1	0	0	31	2	0	0	0	0	0	0	0	0	0	0	0	0	0	20	2	0	0	0	0	0	0	0	0	0	0	0	0	0
1608	2	19420813	3	51	154	98.5	85	0.92	0.8	myopic	-1.5	-1.25	65	-1.75	-2.25	106	37	2	2	0	0	0	0	0	0	0	0	8	0	8	0	37	2	2	0	0	0	0	0	0	0	0	1	0	0	0
1609	2	19511213	3	48	154.5	92.5	79	0.36	0.46		1.25	0.5	173	1.25	0.75	12	20	2	0	0	0	0	0	0	0	0	0	0	0	0	0	20	2	0	0	0	0	0	0	0	0	0	0	0	0	0
1610	1	19520828	7	67	170	102	91	0.1	0.06		1	0.5	153	0.75	0.75	15	10	0	0	0	0	0	0	0	0	0	0	0	0	0	0	10	0	0	0	0	0	0	0	0	0	0	0	0	0	0
1611	2	19490615	4	58	159	94	91	0.22	0		0	1.25	168	1	-1.5	90	20	2	0	0	0	0	0	0	0	0	0	0	0	0	0	10	0	0	0	0	0	0	0	0	0	0	0	0	0	0
1612	1	19551016	4	78	166	108	107	0.18	0.06		-0.25	-1	46	0.75	-1	146	10	0	0	0	0	0	0	0	0	0	0	0	0	0	0	10	0	0	0	0	0	0	0	0	0	0	0	0	0	0
1613	2	19391110	13	60	148	99	95	1.3	1.7	myopic	-3	-1.5	66	-6.75	0	0	10	0	0	0	0	0	0	0	0	0	0	0	0	0	0	88	8	8	8	8	8	8	8	8	8	8	8	8	8	8
1614	2	19580605	8	54	150	95.5	96	0.56	0.42		-0.75	-1.75	175	-0.5	-1.5	21	10	0	0	0	0	0	0	0	0	0	0	0	0	0	0	10	0	0	0	0	0	0	0	0	0	0	0	0	0	0
1615	2	19381209	3	55	152	102.5	95	0.6	0.4		-1	-2	91	-0.25	-3	92	10	0	0	0	0	0	0	0	0	0	0	0	0	0	0	10	0	0	0	0	0	0	0	0	0	0	0	0	0	0
1616	2	19521001	21	40	148	94	80	0.82	0.54	myopic	-3.5	-1.5	56	-1.75	-1	94	10	0	0	0	0	0	0	0	0	0	0	0	0	0	0	10	0	0	0	0	0	0	0	0	0	0	0	0	0	0
1617	2	19520830	11	59	152	93.5	93	0	0		0	0.75	162	0.75	0.25	36	37	2	0	2	0	0	0	0	0	0	0	0	0	0	0	31	2	0	0	0	0	0	0	0	0	0	0	0	0	0
1618	2	19470721	7	56	155.5	105	85	0.3	0.3		0	1.75	179	1.75	-2.75	96	37	2	2	0	0	0	0	0	0	0	0	0	0	0	0	31	2	0	0	0	0	0	0	0	0	0	0	0	0	0
1619	2	19401028	10	54	138.5	111	97.5	0.28	0.2		0.75	-1	91	0.5	0.5	23	88	8	8	8	8	8	8	8	8	8	8	8	8	8	8	37	2	2	0	0	0	0	0	0	0	0	0	0	0	0
1620	2	19380413	3	60	155.5	98	90	1.32	0.44		-9.5	-3.75	87	-2.25	-1.5	77	13	1	0	0	0	0	0	0	0	0	0	0	0	0	0	10	0	0	0	0	0	0	0	0	0	0	0	0	0	0
1621	1	19420711	1	80	165	108	105	0.1	0.18		1.75	0.5	160	1.5	2	180	31	2	0	0	0	0	0	0	0	0	0	0	0	0	0	10	0	0	0	0	0	0	0	0	0	0	0	0	0	0
1622	1	19430115	20	70	162	101	98	-0.1	-0.1		2.5	-1	59	2	-0.5	2
1623	1	19420707	6	70	172	106	86	0.64	0.68	Glaucoma	9.25	2.5	16	8.25	3.25	162	10	0	0	0	0	0	0	0	0	0	0	0	0	0	0	10	0	0	0	0	0	0	0	0	0	0	0	0	0	0
1624	2	19441220	3	48	158.5	92	82.5	0.18	0.22		0.75	2	4	1	0.75	169	10	0	0	0	0	0	0	0	0	0	0	0	0	0	0	10	0	0	0	0	0	0	0	0	0	0	0	0	0	0
1625	2	19420713	18	78	158	111	107	0.2	0.1		0.5	1	137	0.75	0.5	180	10	0	0	0	0	0	0	0	0	0	0	0	0	0	0	10	0	0	0	0	0	0	0	0	0	0	0	0	0	0
1626	1	19530226	17	74	165	110.5	94	1.1	0.4		1	1	175	0.75	1.25	172	47	5	2	0	1	0	0	0	0	0	0	3	0	2	0	47	5	2	0	0	0	0	0	0	0	0	3	0	2	0
1627	2	19370601	8	74	155	110	109	0.22	0.64		1.75	-2	87	1	1.25	175	10	0	0	0	0	0	0	0	0	0	0	0	0	0	0	10	0	0	0	0	0	0	0	0	0	0	0	0	0	0
1628	2	19361216	1	53	154.5	103	88	0.7	1.7	myopic	-0.25	-2.5	87	-1	-2	96	10	0	0	0	0	0	0	0	0	0	0	0	0	0	0	10	0	0	0	0	0	0	0	0	0	0	0	0	0	0
1629	2	19431229	1	58.5	147	96	92	1.7	0.32		0.75	-0.75	97	2.25	-0.5	93																88	8	8	8	8	8	8	8	8	8	8	8	8	8	8
1630	2	19620305	1	73	153	106	100	0.06	0.08		0.25	-0.5	75	1	-1.25	111	10	0	0	0	0	0	0	0	0	0	0	0	0	0	0	10	0	0	0	0	0	0	0	0	0	0	0	0	0	0
1631	2	19381122	15	64	156	104.5	92	0.14	0.22		0.75	1.25	164	0.75	-1	97	10	0	0	0	0	0	0	0	0	0	0	0	0	0	0	10	0	0	0	0	0	0	0	0	0	0	0	0	0	0
1632	2	19570415	11	54	147	95	89.5	0.1	0		0	-0.5	69	0.5	-0.75	109	47	2	0	0	0	0	2	0	0	0	0	0	0	0	0	37	2	2	0	0	0	0	0	0	0	0	0	0	0	0
1633	1	19491107	3	73	162	102.5	95	-0.08	1.1		0.25	0.75	31	-1	-7	78	20	2	0	0	0	0	0	0	0	0	0	0	0	0	0	10	0	0	0	0	0	0	0	0	0	0	0	0	0	0
1634	2	19370607	4	56	153.5	94.5	92	0.1	0.36		0.5	-1.75	114	0.25	-2.25	89	10	0	0	0	0	0	0	0	0	0	0	0	0	0	0	31	2	0	0	0	0	0	0	0	0	0	0	0	0	0
1635	2	19451029	2	64.5	157	104	92	0.24	0.24		0.75	-3	83	1	-3	91	20	2	0	0	0	0	0	0	0	0	0	0	0	0	0	20	2	0	0	0	0	0	0	0	0	0	0	0	0	0
1636	1	19410613	17	64	164.5	106	85	0.34	0.24		0.25	-1.75	90	0.5	-1.5	95	10	0	0	0	0	0	0	0	0	0	0	0	0	0	0	15	2	0	0	0	0	0	0	0	0	0	0	0	0	0
1637	1	19340219	17	68	158.5	106	89	0.16	0.16		1	1.5	3	1.5	1.5	2	15	2	0	0	0	0	0	0	0	0	0	0	0	0	0	37	2	2	0	0	0	0	0	0	0	0	0	0	0	0
1638	1	19521024	18	65	168.5	98.5	89.5	0.48	1.7		-1.25	-1.25	15	0	-1	2	53	6	2	2	0	0	0	0	0	0	0	3	0	2	0	53	6	2	2	0	0	0	0	0	0	0	3	0	2	0
1639	2	19380211	10	60	141.5	97.5	98	0.7	0.4		1.5	2.25	180	2	1.25	6	88	8	8	8	8	8	8	8	8	8	8	8	8	8	8	10	0	0	0	0	0	0	0	0	0	0	0	0	0	0
1640	2	19371109	0	61	150	97	96.5	0.06	0.1		0	1	157	0.5	0.5	20	10	0	0	0	0	0	0	0	0	0	0	0	0	0	0	10	0	0	0	0	0	0	0	0	0	0	0	0	0	0
1641	2	19571015	3	73	154.5	103	102.5	0.24	0.24		0.5	-1.5	91	0.25	-1	72	37	2	2	0	0	0	0	0	0	0	0	0	0	0	0	31	2	0	0	0	0	0	0	0	0	0	0	0	0	0
1642	1	19480610	20	91	168.5	116	115	0.06	0.26		0.25	-1	74	0.5	-1.25	96	47	4	2	0	0	0	0	0	0	0	0	0	0	0	0	37	2	2	2	0	0	0	0	0	0	0	0	0	0	0
1643	1	19660702	3	80	161.5	109	98	-0.1	-0.04		-0.5	-0.75	89	-0.25	-1	94	10	0	0	0	0	0	0	0	0	0	0	0	0	0	0	10	0	0	0	0	0	0	0	0	0	0	0	0	0	0
1644	2	19461112	8	78.5	160.5	117	108	0.38	0.24		0.25	-0.75	180	1.5	-1.75	127	88	8	8	8	8	8	8	8	8	8	8	8	8	8	8	88	8	8	8	8	8	8	8	8	8	8	8	8	8	8
1645	2	19480922	6	65	159	96	93	0	0.1		-1	-0.25	116	0.75	-1	104	10	0	0	0	0	0	0	0	0	0	0	0	0	0	0	31	2	0	0	0	0	0	0	0	0	0	0	0	0	0
1646	1	19421230	8	65	165.5	107.5	91	0.44	0.1		2.75	0.5	125	1.5	0.25	166	31	2	0	0	0	0	0	0	0	0	0	0	0	0	0	31	2	0	0	0	0	0	0	0	0	0	0	0	0	0
1647	1	19430421	1	90	171	116	112	0	0.1		0.5	0.75	176	1	0.25	53	10	0	0	0	0	0	0	0	0	0	0	0	0	0	0	10	0	0	0	0	0	0	0	0	0	0	0	0	0	0
1648	1	19661107	2	100	171	118	108	0.06	0.16		-0.25	-1.75	94	-0.5	-2.5	84	13	1	0	0	0	0	0	0	0	0	0	0	0	0	0	10	0	0	0	0	0	0	0	0	0	0	0	0	0	0
1649	2	19391114	8	67	150	105	106	0.4	0.36		0.5	-2.5	94	1.25	-1.5	93	10	0	0	0	0	0	0	0	0	0	0	0	0	0	0	10	0	0	0	0	0	0	0	0	0	0	0	0	0	0
1650	2	19580620	5	54	156	101	89	0.04	-0.04		0	-0.5	79	0.25	-0.5	111	10	0	0	0	0	0	0	0	0	0	0	0	0	0	0	13	1	0	0	0	0	0	0	0	0	0	0	0	0	0
1651	2	19421202	15	53	156.5	97	92	0.1	0.06		0	1.5	170	0	1.25	12	37	2	2	0	0	0	0	0	0	0	0	0	0	0	0	37	2	2	2	0	0	0	0	0	0	0	0	0	0	0
1652	1	19491122	6	79	165.5	101	96.5	0.1	0.06		1.25	-1.5	25	0.5	0.5	42	10	0	0	0	0	0	0	0	0	0	0	0	0	0	0	10	0	0	0	0	0	0	0	0	0	0	0	0	0	0
1653	1	19380517	2	81	168	105	98	0.06	0.16		1.25	0	0	1	0.75	18	20	2	0	0	0	0	0	0	0	0	0	0	0	0	0	37	2	2	0	0	0	0	0	0	0	0	0	0	0	0
1654	2	19480521	3	72	153	106	102	0	0		1	0.5	27	0.75	0.25	178	20	2	0	0	0	0	0	0	0	0	0	0	0	0	0	20	2	0	0	0	0	0	0	0	0	0	0	0	0	0
1655	2	19650805	9	67	152	101	99	0	-0.04		0	-0.75	102	0	-0.25	138	10	0	0	0	0	0	0	0	0	0	0	0	0	0	0	10	0	0	0	0	0	0	0	0	0	0	0	0	0	0
1656	1	19560731	17	83	176	106.5	96.5	0.2	0.2		1	-1.5	10	0.5	-1	177	47	3	2	0	2	0	0	0	0	0	0	2	0	0	0	37	2	2	2	1	0	0	0	0	0	0	0	0	0	0
1657	2	19380818	16	57	153	93	97	1.7	0.9	cataract	0.5	-2.75	83	2.25	-3.25	89	88	8	8	8	8	8	8	8	8	8	8	8	8	8	8	88	8	8	8	8	8	8	8	8	8	8	8	8	8	8
1658	2	19550631	1	69.5	159	101	94	0.02	0.1		-0.25	-1	88	-0.5	-0.75	109	37	2	0	2	0	0	0	0	0	0	0	0	0	0	0	37	2	0	2	0	0	0	0	0	0	0	0	0	0	0
1659	2	19560301	8	71	161	100	96	-0.08	0.12		0.5	-0.75	81	0.5	-0.75	96	37	2	2	0	0	0	0	0	0	0	0	0	0	0	0	20	2	0	0	0	0	0	0	0	0	0	0	0	0	0
1660	2	19481106	9	58	156	104	89	0	0		0.75	0.5	14	0.5	0.25	29	10	0	0	0	0	0	0	0	0	0	0	0	0	0	0	15	2	0	0	0	0	0	0	0	0	0	0	0	0	0
1661	2	19511120	2	74	147.5	114.5	115	1.7	1	myopic	-11.25	-3.75	26	-8.75	-2	171	88	8	8	8	8	8	8	8	8	8	8	8	8	8	8	15	2	0	0	0	0	0	0	0	0	0	0	0	0	0
1662	2	19550330	3	65.5	165.5	100	87	0	0		0	0.75	163	0.25	1	6	10	0	0	0	0	0	0	0	0	0	0	0	0	0	0	10	0	0	0	0	0	0	0	0	0	0	0	0	0	0
1663	1	19530613	18	81	170.5	110	102	0.28	0.22		-0.5	-1.75	94	0	-1.5	90	43	3	2	0	0	0	0	0	0	0	0	0	0	0	0	37	2	0	2	0	0	0	0	0	0	0	0	0	0	0
1664	2	19800523	1	65	157	98.5	89	0.54	0.54	myopic	-6.25	-1	179	-6.5	-2.25	24	10	0	0	0	0	0	0	0	0	0	0	0	0	0	0	10	0	0	0	0	0	0	0	0	0	0	0	0	0	0
1665	1	19661216	2	84	164	109	100	0	0		0	-0.75	5	0	0.25	1	20	2	0	0	0	0	0	0	0	0	0	0	0	0	0	10	0	0	0	0	0	0	0	0	0	0	0	0	0	0
1666	2	19481012	8	67	156.5	104	100	0.1	0.38		-0.5	-1	91	-1	-1	76	20	2	0	0	0	0	0	0	0	0	0	0	0	0	0	10	0	0	0	0	0	0	0	0	0	0	0	0	0	0
1667	2	19561221	3	84	160.5	109.5	111	1.7	1.7	myopic	-20	0	0	-23.25	-1.5	163	10	0	0	0	0	0	0	0	0	0	0	0	0	0	0	14	0	2	0	0	0	0	0	0	0	0	0	0	0	0
1668	2	19631123	5	94	170.5	109	104.5	0.3	0.26		-1	-1	30	-1.25	-0.5	136	37	2	2	0	0	0	0	0	0	0	0	0	0	0	0	37	2	2	2	0	0	0	0	0	0	0	0	0	0	0
1669	2	19471024	6	77	154	115	112.5	1.7	1.7	cataract																						88	8	8	8	8	8	8	8	8	8	8	8	8	8	8
1670	2	19410310	11	55	147	93	88	0.62	0.6	myopic	0.5	0.5	169	0.25	1.75	164	15	2	0	0	0	0	0	0	0	0	0	0	0	0	0	37	2	2	0	0	0	0	0	0	0	0	0	0	0	0
1672	1	19490917	5	63	159.5	100	88	0.08	0		0.5	-1	78	0.75	0	0	37	2	0	2	0	0	0	0	0	0	0	0	0	0	0	37	2	0	2	0	0	0	0	0	0	0	0	0	0	0
1673	1	19540320	10	74	170	104	90	-0.06	-0.06		1	0.25	165	0.75	0	0	37	2	2	0	0	0	0	0	0	0	0	0	0	0	0	20	2	0	0	0	0	0	0	0	0	0	0	0	0	0
1674	2	19571017	10	57	154	94	94.5	0.2	0.2		-1.75	-0.5	133	-2.75	-2.25	89	53	6	2	2	2	0	0	0	0	0	0	3	0	2	0	37	2	0	2	0	0	0	0	0	0	0	1	0	0	0
1675	2	19560707	3	65	157	99	98	-0.1	-0.1		0	0.25	108	0	-0.5	97	10	0	0	0	0	0	0	0	0	0	0	0	0	0	0	10	0	0	0	0	0	0	0	0	0	0	0	0	0	0
1676	1	19601021	18	68	170	102	90	0.22	0.12		-0.5	-1	62	0.5	-1.25	91	43	2	2	2	2	0	0	0	0	0	0	2	0	0	0	43	4	2	2	2	0	0	0	0	0	0	3	0	2	0
1677	2	19310610	9	60	153.5	94	97.5	0.3	0.68		-0.75	-1	89	-3	-1.25	106	88															88
1678	1	19580528	7	80	171	107	95.5	0.1	0.1		-0.25	-0.75	69	-0.25	-1	93	10	0	0	0	0	0	0	0	0	0	0	0	0	0	0	10	0	0	0	0	0	0	0	0	0	0	0	0	0	0
1679	2	19471001	4	60	154.5	97	90	0.16	0.58		1.25	-1.5	86	1	4.25	2	53	6	2	0	0	0	0	0	0	0	0	0	0	0	0	53	6	2	0	0	0	0	0	0	0	0	2	0	0	0
1680	1	19601010	5	67	165.5	99	91	0	-0.04		0	0.25	6	0.5	0.5	173	10	0	0	0	0	0	0	0	0	0	0	0	0	0	0	10	0	0	0	0	0	0	0	0	0	0	0	0	0	0
1681	1	19500301	12	75	163	102	101	0.1	0.02		0.25	-1.5	84	-0.25	-1	103	10	0	0	0	0	0	0	0	0	0	0	0	0	0	0	10	0	0	0	0	0	0	0	0	0	0	0	0	0	0
1682	2	19660605	0	73.5	163	99	99	-0.04	0		0.5	0.5	174	0.5	0.75	12	10	0	0	0	0	0	0	0	0	0	0	0	0	0	0	10	0	0	0	0	0	0	0	0	0	0	0	0	0	0
1684	1	19501025	10	71	172	102	87	0	0		0	1.25	172	1	-1.75	99	20	2	0	0	0	0	0	0	0	0	0	0	0	0	0	37	2	1	2	0	0	0	0	0	0	0	0	0	0	0
1685	1	19520108	1	87	177	111	100	0	0		-0.5	-0.25	32	-0.75	-0.25	131	31	2	0	0	0	0	0	0	0	0	0	0	0	0	0	20	2	0	0	0	0	0	0	0	0	0	0	0	0	0
1686	1	19570913	18	84	166	110	98	0.36	0.44		-1.75	-0.75	101	-0.75	-1.25	98	37	2	0	2	0	0	0	0	0	0	0	0	0	0	0	37	2	0	2	0	0	0	0	0	0	0	0	0	0	0
1687	1	19510701	20	60	158	97	86	0.28	0.16		-1	-0.5	48	-1.25	-0.75	176	20	2	0	0	0	0	0	0	0	0	0	0	0	0	0	31	2	0	0	0	0	0	0	0	0	0	0	0	0	0
1688	2	19451015	15	69	160	104	103	0.3	0.26		3	0.25	180	2.5	0	0	10	0	0	0	0	0	0	0	0	0	0	0	0	0	0	10	0	0	0	0	0	0	0	0	0	0	0	0	0	0
1689	1	19500729	10	80	167	109	95	0	-0.1		0	-0.25	53	0	0.25	18	31	2	0	0	0	0	0	0	0	0	0	0	0	0	0	20	2	0	0	0	0	0	0	0	0	0	0	0	0	0
1691	2	19330609	5	55	146	94	93	1.1	1.1	cataract	4	2.25	5	4.25	1.75	20	88	8	8	8	8	8	8	8	8	8	8	8	8	8	8	88	8	8	8	8	8	8	8	8	8	8	8	8	8	8
1692	2	19370911	20	78	158.5	115.5	114	1.7	1	cataract				0.5	-0.75	116	88	8	8	8	8	8	8	8	8	8	8	8	8	8	8	61	1	0	0	0	0	0	0	0	0	0	0	3	0	0
1693	2	19520219	0	62	163	93.5	82	0.48	0.5		-3.25	-1.5	93	-3	-1	88	10	0	0	0	0	0	0	0	0	0	0	0	0	0	0	10	0	0	0	0	0	0	0	0	0	0	0	0	0	0
1694	2	19380109	8	45	150	92	80	0.2	0.2		0.25	-1	92	-0.75	-0.75	71	31	2	0	0	0	0	0	0	0	0	0	0	0	0	0	31	2	0	0	0	0	0	0	0	0	0	0	0	0	0
1695	1	19491205	4	85	176.5	113	99	0.7	0.7	myopic	-2.5	-1.5	79	-3	-0.5	100	10	0	0	0	0	0	0	0	0	0	0	0	0	0	0	10	0	0	0	0	0	0	0	0	0	0	0	0	0	0
1696	2	19620415	12	62	165	97.5	89	0.2	0.54		0	0.25	4	-1.25	-1.5	14	43	2	2	2	2	0	0	0	0	0	0	3	0	2	0	43	4	2	2	0	0	0	0	0	0	0	3	0	3	0
1697	1	19391217	5	81	162.5	122	103.5	0.1	0.1		0.25	1.5	7	0.25	1.25	170	10	0	0	0	0	0	0	0	0	0	0	0	0	0	0	20	2	0	0	0	0	0	0	0	0	0	0	0	0	0
1698	2	19491120	3	62	161	100	93.5	0.44	0.72		-1	-1.5	82	-2.5	-1.75	110	15	2	0	0	0	0	0	0	0	0	0	0	0	0	0	10	0	0	0	0	0	0	0	0	0	0	0	0	0	0
1699	2	19570115	5	55	156.5	96	87	0.14	0.16		0.5	-1.75	87	0.25	-1.5	99	20	2	0	0	0	0	0	0	0	0	0	0	0	0	0	10	0	0	0	0	0	0	0	0	0	0	0	0	0	0
1700	2	19531015	10	63	158	99	93	0.46	0.4		-0.75	-1.5	96	-0.5	-2	87	37	2	2	0	0	0	0	0	0	0	0	0	0	0	0	37	2	2	0	0	0	0	0	0	0	0	0	0	0	0
1701	1	19420404	4	78	167.5	105	102	0.28	0.22		-2.25	-0.5	3	-1	-1.25	175	10	0	0	0	0	0	0	0	0	0	0	0	0	0	0	31	2	0	0	0	0	0	0	0	0	0	0	0	0	0
1702	2	19630704	10	71.5	156	107	101	-0.04	-0.04		0	0.5	164	0	0	0	20	2	0	0	0	0	0	0	0	0	0	0	0	0	0	37	2	2	2	0	0	0	0	0	0	0	0	0	0	0
1703	2	19610313	4	58	160.5	99	91	0.1	0		0.75	1	173	1	0.25	147	37	2	2	0	0	0	0	0	0	0	0	0	0	0	0	10	0	0	0	0	0	0	0	0	0	0	0	0	0	0
1704	1	19580301	8	78.5	168	104	102	0.18	0.14		-0.75	0	0	-0.75	-0.25	96	10	0	0	0	0	0	0	0	0	0	0	0	0	0	0	10	0	0	0	0	0	0	0	0	0	0	0	0	0	0
1705	2	19530109	7	67	159.5	108	94	0.1	0.2		0	0.25	36	0	1	180	10	0	0	0	0	0	0	0	0	0	0	0	0	0	0	10	0	0	0	0	0	0	0	0	0	0	0	0	0	0
1706	2	19510503	20	64	161	99	92	0.08	0.04		0.25	0.75	35	0.25	0.5	15	20	2	0	0	0	0	0	0	0	0	0	0	0	0	0	31	2	0	0	0	0	0	0	0	0	0	0	0	0	0
1707	2	19490714	14	72	157	107	100	0.16	0.1		1.25	-2.25	82	0	-1.5	102	37	2	2	0	0	0	0	0	0	0	0	0	0	0	0	15	2	0	0	0	0	0	0	0	0	0	0	0	0	0
1708	2	19590821	4	74	158	109	104	0.12	0.1		0.75	-1.75	78	0.75	-1	108	20	2	0	0	0	0	0	0	0	0	0	0	0	0	0	10	0	0	0	0	0	0	0	0	0	0	0	0	0	0
1709	1	19440314	3	77	165	106	98	-0.02	0		0.25	-0.75	113	0	0	0	20	2	0	0	0	0	0	0	0	0	0	0	0	0	0	37	2	2	0	0	0	0	0	0	0	0	0	0	0	0
1710	2	19450625	15	62	152	101	96	0.06	0.12		1.5	1.25	164	1.5	0.75	14	31	2	0	0	0	0	0	0	0	0	0	0	0	0	0	37	2	2	0	0	0	0	0	0	0	0	0	0	0	0
1711	1	19510719	7	74	165	103	97	0	0		1.25	-1.75	68	0	1.5	19	10	0	0	0	0	0	0	0	0	0	0	0	0	0	0	10	0	0	0	0	0	0	0	0	0	0	0	0	0	0
1712	2	19421003	8	77	158.5	115	107	0.02	0.1		0.5	0.25	161	0	0.5	52	15	2	0	0	0	0	0	0	0	0	0	0	0	0	0	10	0	0	0	0	0	0	0	0	0	0	0	0	0	0
1713	1	19500720	20	89	170	105	101	0.1	0.14		-0.5	-0.75	85	-1	-0.75	115	20	2	0	0	0	0	0	0	0	0	0	0	0	0	0	31	2	0	0	0	0	0	0	0	0	0	0	0	0	0
1714	2	19570224	4	66	158	102	96	-0.1	-0.02		0.5	0	0	0.5	0	0	20	2	0	0	0	0	0	0	0	0	0	0	0	0	0	20	2	0	0	0	0	0	0	0	0	0	0	0	0	0
1715	2	19440216	12	59	160	93	92	0.2	0.12		0	2.25	167	0.75	-1.25	114	15	2	0	0	0	0	0	0	0	0	0	0	0	0	0	10	0	0	0	0	0	0	0	0	0	0	0	0	0	0
1716	2	19520604	0	76	159	106	107	0.2	0.1		-0.5	-0.75	88	0.25	-1.25	102	13	0	1	0	0	0	0	0	0	0	0	0	0	0	0	10	0	0	0	0	0	0	0	0	0	0	0	0	0	0
1717	1	19420102	13	64	169	102	84	0.1	0.2		-0.25	-1	72	-2.25	-1.75	105	47	5	2	0	0	0	0	0	0	0	0	0	0	0	0	43	4	2	1	0	0	0	0	0	0	0	0	0	0	0
1718	2	19651216	5	64	159	101	96	-0.1	-0.08		0	0.25	95	0	-0.25	147	37	2	0	2	0	0	0	0	0	0	0	0	0	0	0	37	2	2	0	0	0	0	0	0	0	0	0	0	0	0
1719	2	19560906	9	60	150	92	89	0	0		0	-0.5	70	-0.25	0	0	10	0	0	0	0	0	0	0	0	0	0	0	0	0	0	15	2	0	0	0	0	0	0	0	0	0	0	0	0	0
1720	1	19610109	5	90	176	106	106	0	-0.02		-0.5	0	0	0	-0.5	84	10	0	0	0	0	0	0	0	0	0	0	0	0	0	0	10	0	0	0	0	0	0	0	0	0	0	0	0	0	0
1721	2	19620207	1	59	155	95	91	0.1	-0.1		0.5	-1.25	62	0.25	0.25	47	10	0	0	0	0	0	0	0	0	0	0	0	0	0	0	10	0	0	0	0	0	0	0	0	0	0	0	0	0	0
1722	2	19390119	1	64	157	105	101	0.2	0.7		0	0.75	133	-4	-2.25	102	88	8	8	8	8	8	8	8	8	8	8	8	8	8	8	88	8	8	8	8	8	8	8	8	8	8	8	8	8	8
1723	1	19571011	12	68	160	97	92	0.12	0.16		-0.25	-0.75	169	-0.25	-0.5	144	37	2	0	2	0	0	0	0	0	0	0	0	0	0	0	20	2	0	0	0	0	0	0	0	0	0	0	0	0	0
1724	1	19720220	3	80	179	102	97	0	-0.08		0.5	-0.75	135	0.25	-0.75	142	10	0	0	0	0	0	0	0	0	0	0	0	0	0	0	10	0	0	0	0	0	0	0	0	0	0	0	0	0	0
1725	2	19421017	1	68.5	147.5	105	110	0.26	0.1		2.25	-3	88	2	-2.25	88	10	0	0	0	0	0	0	0	0	0	0	0	0	0	0	10	0	0	0	0	0	0	0	0	0	0	0	0	0	0
1726	2	19430329	0	77	157	108	103	0.4	0.4		1.5	0.5	155	3	0.5	9	88	8	8	8	8	8	8	8	8	8	8	8	8	8	8	10	0	0	0	0	0	0	0	0	0	0	0	0	0	0
1727	2	19550810	0	41	149	83	84	0.7	0.7	myopic	9	1.25	52	8.75	1.75	112	20	2	0	0	0	0	0	0	0	0	0	0	0	0	0	10	0	0	0	0	0	0	0	0	0	0	0	0	0	0
1728	1	19491009	5	84	165	107	102	0.1	-0.02		0.5	-1	94	0	1	172	10	0	0	0	0	0	0	0	0	0	0	0	0	0	0	10	0	0	0	0	0	0	0	0	0	0	0	0	0	0
1729	1	19490327	10	81	172.5	103	100	0.2	0.1		-0.75	-0.75	29	0.5	-1	103	37	2	0	2	0	0	0	0	0	0	0	0	0	0	0	37	2	0	2	0	0	0	0	0	0	0	0	0	0	0
1730	2	19610127	14	54	156	98	90.5	0.08	0.06		0	0.75	172	0.5	0.25	19	37	2	2	0	0	0	0	0	0	0	0	0	0	0	0	20	2	0	0	0	0	0	0	0	0	0	0	0	0	0
1731	2	19361217	4	75	157	110	103	0.2	0.24		1.5	1	4	1.5	1	3	37	2	2	0	0	0	0	0	0	0	0	0	0	0	0	37	2	2	0	0	0	0	0	0	0	0	0	0	0	0
1732	2	19630616	11	65	156.5	96	97	0.52	0.52	myopic	-2.5	-1	91	-2.75	0.25	99	53	6	2	2	0	0	2	0	0	0	0	0	0	0	0	53	6	2	2	2	0	0	0	0	0	0	2	0	0	0
1733	1	19501108	23	77	178	105	92	0.3	0.4		-1	-0.5	85	-1.5	-0.75	119	37	2	2	0	0	0	0	0	0	0	0	0	0	0	0	37	2	2	0	0	0	0	0	0	0	0	0	0	0	0
1734	1	19540218	0	62	160	100	88	0.1	0.12		1	1	179	1.5	1.5	163	31	2	0	0	0	0	0	0	0	0	0	0	0	0	0	31	2	0	0	0	0	0	0	0	0	0	0	0	0	0
1735	2	19570618	1	68	156	102	100	0.8	0.74	myopic	-6.5	-0.25	153	-4.75	-1	40	31	2	0	0	0	0	0	0	0	0	0	0	0	0	0	37	2	0	2	0	0	0	0	0	0	0	0	0	0	0
1736	1	19550310	8	83	173	106	100	0.3	0.3		0.5	-1.75	92	0.25	-1.75	98	20	2	0	0	0	0	0	0	0	0	0	0	0	0	0	12	2	0	0	0	0	0	0	0	0	0	0	0	0	0
1737	2	19580711	13	54	153	99	95.5	0.1	0.1		0	0.75	152	0.5	-0.75	100	37	2	2	0	0	0	0	0	0	0	0	0	0	0	0	37	2	2	0	0	0	0	0	0	0	0	0	0	0	0
1738	1	19591221	1	71	165	102	89	0	0.02		1	-1.25	83	0.25	-0.75	95	10	0	0	0	0	0	0	0	0	0	0	0	0	0	0	10	0	0	0	0	0	0	0	0	0	0	0	0	0	0
1739	2	19600921	3	61	155	97	94	0.1	0.1		1.25	0.25	178	1.25	0.25	12	20	2	0	0	0	0	0	0	0	0	0	0	0	0	0	10	0	0	0	0	0	0	0	0	0	0	0	0	0	0
1740	1	19550328	1	66	160	99	85	0.2	0.22		2	-3	88	2	-3.25	84	10	0	0	0	0	0	0	0	0	0	0	0	0	0	0	14	0	0	2	0	0	0	0	0	0	0	0	0	0	0
1741	2	19461220	3	60	155	97.5	92	0.96	1.6	myopic	-4.5	-3	13	-15	-3.25	108	10	0	0	0	0	0	0	0	0	0	0	0	0	0	0	88	8	8	8	8	8	8	8	8	8	8	8	8	8	8
1742	2	19680318	2	62	157.5	92.5	91	0.4	0.56		-2.25	-1.25	93	-2.5	-1.5	84	43	4	2	2	0	0	0	0	0	0	0	0	0	0	0	43	4	2	2	0	0	0	0	0	0	0	0	0	0	0
1743	1	19421222	30	83	174	110	105	1.7	1	cataract	-6.5	-0.25	16	0	-0.75	45	88	8	8	8	8	8	8	8	8	8	8	8	8	8	8	88	8	8	8	8	8	8	8	8	8	8	8	8	8	8
1744	2	19630203	3	65	161	105	96	0.02	0		0	0.25	114	0	-0.25	22	10	0	0	0	0	0	0	0	0	0	0	0	0	0	0	20	2	0	0	0	0	0	0	0	0	0	0	0	0	0
1745	2	19440318	3	71	155	115	107	0.24	0.26		-0.5	-2	69	-0.5	-1.75	110	10	0	0	0	0	0	0	0	0	0	0	0	0	0	0	10	0	0	0	0	0	0	0	0	0	0	0	0	0	0
1746	1	19361019	8	72	157	96	95	0.4	0.3		1.25	-1.75	92	0	-1	107	20	2	0	0	0	0	0	0	0	0	0	0	0	0	0	10	0	0	0	0	0	0	0	0	0	0	0	0	0	0
1747	2	19460309	10	68.5	152	107	102	0.12	0.06		0.75	-2.25	109	1.25	-2.75	84	37	2	2	0	0	0	0	0	0	0	0	0	0	0	0	10	0	0	0	0	0	0	0	0	0	0	0	0	0	0
1748	2	19450411	14	57	163.5	97.5	93	0.62	0.4		-1.75	-1.75	59	0.25	-2.5	94	88	8	8	8	8	8	8	8	8	8	8	8	8	8	8	88	8	8	8	8	8	8	8	8	8	8	8	8	8	8
1749	2	19371210	5	59	148	100	96	0.52	0.32		4.25	1	129	3.25	0.25	18	10	0	0	0	0	0	0	0	0	0	0	0	0	0	0	10	0	0	0	0	0	0	0	0	0	0	0	0	0	0
1750	2	19630816	14	64	160	100	90	0.04	0.02		0.25	-0.5	56	-0.25	-0.25	100	31	2	0	0	0	0	0	0	0	0	0	0	0	0	0	20	2	0	0	0	0	0	0	0	0	0	0	0	0	0
1751	2	19600324	0	67	154.5	98	99.5	0.06	0.04		0.75	-1.25	85	0	-0.5	67	37	2	2	2	0	0	0	0	0	0	0	0	0	0	0	31	2	0	0	0	0	0	0	0	0	0	0	0	0	0
1752	1	19541109	0	75	168	100.5	95	-0.06	-0.02		0	0.5	4	0	0	0	20	2	0	0	0	0	0	0	0	0	0	0	0	0	0	20	2	0	0	0	0	0	0	0	0	0	0	0	0	0
1753	1	19491226	4	64	158	100	90	0.12	0.22		-0.75	-0.5	81	0	-2	86	31	2	0	0	0	0	0	0	0	0	0	3	0	2	0	31	2	0	0	0	0	0	0	0	0	0	0	0	0	0
1754	2	19610404	17	57	155	95	94	0.04	0.06		0.25	0.25	34	0.25	0.25	123	37	2	2	0	0	0	0	0	0	0	0	0	0	0	0	37	2	2	0	0	0	0	0	0	0	0	0	0	0	0
1755	2	19450405	13	62	159.5	97	93.5	0.56	0.48		0	1.25	11	0	-1.75	103	43	4	2	0	0	0	0	0	0	0	0	3	0	3	0	43	4	2	0	0	0	0	0	0	0	0	3	0	2	0
1756	1	19680330	4	77	168	107	100	0	0		0.25	0.75	145	0.25	0.5	33	20	2	0	0	0	0	0	0	0	0	0	0	0	0	0	15	2	0	0	0	0	0	0	0	0	0	0	0	0	0
1758	1	19421010	10	88	165	112	108	0.1	1.7		1.25	0.25	149	5.75	2.25	99	31	2	0	0	0	0	0	0	0	0	0	0	0	0	0	15	2	0	0	0	0	0	0	0	0	0	0	0	0	0
1759	2	19441201	13	70	156.5	104	97	0.1	0.1		0	1.75	163	0.5	1.5	14	37	2	2	0	0	0	0	0	0	0	0	0	0	0	0	15	2	0	0	0	0	0	0	0	0	0	0	0	0	0
1760	2	19410717	8	84	160	110	114	0.84	1.7	myopic	-5.5	-2.25	81	-9	-4.75	80	10	0	0	0	0	0	0	0	0	0	0	0	0	0	0	31	2	0	0	0	0	0	0	0	0	0	0	0	0	0
1761	1	19630916	5	61	162	97	87	0.12	0.24		2.5	-1.75	78	2.25	-2	92
1762	2	19311217	9	75	153.5	107	109	0.4	0.5		1.75	-3.25	85	1.75	-2.75	95	10	0	0	0	0	0	0	0	0	0	0	0	0	0	0	10	0	0	0	0	0	0	0	0	0	0	0	0	0	0
1763	2	19441119	3	66	151	114	95	0.48	1.1		3.75	0.75	174	4.5	2.25	15	10	0	0	0	0	0	0	0	0	0	0	0	0	0	0	20	2	0	0	0	0	0	0	0	0	0	0	0	0	0
1764	2	19440929	16	67	148	106	101	1.7	1	PDR				0.5	0.75	173	85	8	8	8	8	8	8	8	8	8	3	8	8	8	8	71	2	0	0	0	0	0	3	0	4	0	3	7	2	3
1765	2	19590319	5	84	170	100	107	0.1	0.1		0.5	-1	87	1	-1.5	99	13	1	0	0	0	0	0	0	0	0	0	0	0	0	0	10	0	0	0	0	0	0	0	0	0	0	0	0	0	0
1766	1	19580422	7	85	174	111	94	0	1.7		1.5	0.75	25	3.25	1.25	174	20	2	0	0	0	0	0	0	0	0	0	0	0	0	0	12	2	0	0	0	0	0	3	3	4	3	7	0	7	0
1767	1	19561217	0	76	172.5	100.5	94	0	0		0	-0.25	54	0	-0.5	109	10	0	0	0	0	0	0	0	0	0	0	0	0	0	0	10	0	0	0	0	0	0	0	0	0	0	0	0	0	0
1768	2	19751011	5	60	156	96	92	0.1	0.1		-4	-0.25	65	-3.25	-0.5	93	20	2	0	0	0	0	0	0	0	0	0	0	0	0	0	10	0	0	0	0	0	0	0	0	0	0	0	0	0	0
1769	1	19480622	7	70	172	105	83	0.1	0.14		1	-1.25	81	1	-1.25	91	10	0	0	0	0	0	0	0	0	0	0	0	0	0	0	10	0	0	0	0	0	0	0	0	0	0	0	0	0	0
1770	1	19650121	4	78	176	107	112	0.24	0.2		-0.5	-0.75	36	-0.5	-0.75	121	20	2	0	0	0	0	0	0	0	0	0	0	0	0	0	10	0	0	0	0	0	0	0	0	0	0	0	0	0	0
1771	1	19520524	2	70	159.5	101	93	0.46	0.54		0.25	-1.5	78	-0.75	-1.25	127	37	2	0	2	0	0	0	0	0	0	0	0	0	0	0	37	2	0	2	0	0	0	0	0	0	0	0	0	0	0
1772	1	19530301	3	81.5	172	101	96	0	0		1	0.75	176	1.25	0.5	9	20	2	0	0	0	0	0	0	0	0	0	0	0	0	0	31	2	0	0	0	0	0	0	0	0	0	0	0	0	0
1773	1	19461226	12	80	170	106	103	0.14	0.08		0.25	-1.25	102	1	-1.25	83	20	2	0	0	0	0	0	0	0	0	0	0	0	0	0	10	0	0	0	0	0	0	0	0	0	0	0	0	0	0
1774	2	19541119	7	67	158	102	100	1.7	0.9	myopic	0	-5	180	-6.75	-5.75	180	10	0	0	0	0	0	0	0	0	0	0	0	0	0	0	31	2	0	0	0	0	0	0	0	0	0	0	0	0	0
1775	2	19580930	3	54	151	93	83	0.1	0.1		0.5	-0.75	79	0	1	19	13	1	0	0	0	0	0	0	0	0	0	0	0	0	0	37	2	2	0	0	0	0	0	0	0	0	0	0	0	0
1776	1	19470902	7	66	170.5	96	92.5	1.7	1.7	cataract	2.25	-1.75	79	3	-2	100																88	8	8	8	8	8	8	8	8	8	8	8	8	8	8
1777	1	19770510	1	73	165	106	83	0.16	0.18		-1.25	-0.75	170	-1.25	-0.25	26	20	2	0	0	0	0	0	0	0	0	0	0	0	0	0	13	1	0	0	0	0	0	0	0	0	0	0	0	0	0
1778	2	19570313	3	67	155	103	100	0.14	0.1		0	1.5	8	0.25	0.75	1	10	0	0	0	0	0	0	0	0	0	0	0	0	0	0	10	0	0	0	0	0	0	0	0	0	0	0	0	0	0
1779	2	19550422	5	64	164	101	95	0.3	0.32		-0.75	-0.5	96	-0.75	-0.75	56	10	0	0	0	0	0	0	0	0	0	0	0	0	0	0	10	0	0	0	0	0	0	0	0	0	0	0	0	0	0
1780	1	19360303	3	71	166	103	94	0.2	0.14		0.5	1.75	2	0.25	1.75	5	10	0	0	0	0	0	0	0	0	0	0	0	0	0	0	10	0	0	0	0	0	0	0	0	0	0	0	0	0	0
1781	2	19380511	10	81	153	114	115	0.5	0.2		0.75	-1.25	57	0	1	12	88	8	8	8	8	8	8	8	8	8	8	8	8	8	8	13	1	0	0	0	0	0	0	0	0	0	0	0	0	0
1782	2	19380629	8	48	149	99	86	0.4	0.58		-0.5	-2.25	76	-0.75	-1.5	125	88	8	8	8	8	8	8	8	8	8	8	8	8	8	8	88	8	8	8	8	8	8	8	8	8	8	8	8	8	8
1783	2	19460126	9	56	155	97	91	0.1	0		0.75	1.75	177	0.5	0.5	5	20	2	0	0	0	0	0	0	0	0	0	0	0	0	0	10	0	0	0	0	0	0	0	0	0	0	0	0	0	0
1784	1	19410228	3	91	179.5	107	105	0.28	0.26		0.25	1.75	177	0	1.25	177	10	0	0	0	0	0	0	0	0	0	0	0	0	0	0	15	2	0	0	0	0	0	0	0	0	0	0	0	0	0
1785	2	19420608	4	63	150	102.5	97	0.1	0.1		1	0.75	155	1	1	17	10	0	0	0	0	0	0	0	0	0	0	0	0	0	0	10	0	0	0	0	0	0	0	0	0	0	0	0	0	0
1786	2	19550609	10	60	147	96	93	0.6	0.6	diabetic maculopathy	-0.5	-2	99	-0.75	-1.25	108	37	2	2	0	0	0	0	0	0	0	0	0	0	0	0	37	2	2	0	0	0	0	0	0	0	0	3	0	2	0
1787	2	19470727	15	43	148.5	89	74	0.64	0.62	myopic	1	-2	84	0.75	-1	94	37	2	2	8	8	8	8	8	8	8	8	8	8	8	8	37	2	2	8	8	8	8	8	8	8	8	8	8	8	8
1788	1	19470224	13	61	157	100	85	1.7	0.4		-5	-3	94	0.75	-2.5	85	88	8	8	8	8	8	8	8	8	8	8	8	8	8	8	10	0	0	0	0	0	0	0	0	0	0	0	0	0	0
1789	1	19561012	6	78	168	103	89	0	0		0.25	0.25	9	0.25	0.5	18	10	0	0	0	0	0	0	0	0	0	0	0	0	0	0	10	0	0	0	0	0	0	0	0	0	0	0	0	0	0
1790	1	19420802	1	58	158	100	85	0.3	0.3		0	2	180	0.5	2	2	10	0	0	0	0	0	0	0	0	0	0	0	0	0	0	10	0	0	0	0	0	0	0	0	0	0	0	0	0	0
1791	1	19470113	15	70	173	93.5	94	0.04	0		0.25	1.25	168	0.5	1	5	10	0	0	0	0	0	0	0	0	0	0	0	0	0	0	10	0	0	0	0	0	0	0	0	0	0	0	0	0	0
1792	1	19540804	1	82	167.5	106	102	0.08	0.2		0.75	1.5	177	0.75	1	179	10	0	0	0	0	0	0	0	0	0	0	0	0	0	0	10	0	0	0	0	0	0	0	0	0	0	0	0	0	0
1793	2	19500717	8	62	148	97	95	0.1	0.1		0	-0.5	54	0.5	-0.75	106	31	2	0	0	0	0	0	0	0	0	0	0	0	0	0	20	2	0	0	0	0	0	0	0	0	0	0	0	0	0
1794	2	19570816	0	63	152	98.5	92	0.1	0.04		1.5	-2	70	1.75	-2	90	15	2	0	0	0	0	0	0	0	0	0	0	0	0	0	10	0	0	0	0	0	0	0	0	0	0	0	0	0	0
1795	2	19490123	10	74	154	100	107	0.2	0.2		1.25	-1.5	84	0.25	-0.5	115	37	2	0	2	0	0	0	0	0	0	0	0	0	0	0	31	2	0	0	0	0	0	0	0	0	0	0	0	0	0
1796	1	19640325	3	88	178	104	101	0.24	0.2		2	1	116	0.5	1	73	20	2	0	0	0	0	0	0	0	0	0	0	0	0	0	20	2	0	0	0	0	0	0	0	0	0	0	0	0	0
1797	1	19310118	8	84	166	115	105	0.22	0.24		1	-1.25	83	1.5	-2	100	20	2	0	0	0	0	0	0	0	0	0	0	0	0	0	20	2	0	0	0	0	0	0	0	0	0	0	0	0	0
1798	1	19371224	1	64	152	103	95	0.18	0.06		0.25	2.25	177	1	-2.75	83	10	0	0	0	0	0	0	0	0	0	0	0	0	0	0	10	0	0	0	0	0	0	0	0	0	0	0	0	0	0
1799	1	19590827	8	78	170	106	96	0	0.1		0.25	0	0	0	0.5	29	31	2	0	0	0	0	0	0	0	0	0	0	0	0	0	37	2	0	2	0	0	0	0	0	0	0	0	0	0	0
1800	1	19521103	8	65	161.5	95	93	0.1	0.12		1.75	1.5	173	2.25	0.75	25	31	2	0	0	0	0	0	0	0	0	0	0	0	0	0	31	2	0	0	0	0	0	0	0	0	0	0	0	0	0
1801	1	19600802	14	88	165	113	117	0.1	0.04		-0.25	-0.5	82	-0.75	-0.25	74	53	2	2	2	4	0	0	0	0	0	0	0	0	0	0	53	2	2	2	4	0	0	0	0	0	0	0	0	0	0
1802	1	19540806	6	59	171	97	81	0.06	0.1		0.5	1	172	1	0.5	24	43	2	2	0	2	0	0	0	0	0	0	0	0	0	0	43	3	2	2	0	0	0	0	0	0	0	0	0	0	0
1803	2	19460812	1	66	161	102	94	0.48	1.7		-6.5	-1.5	5	0.25	-0.5	71	15	2	0	0	0	0	0	0	0	0	0	0	0	0	0	31	2	0	0	0	0	0	0	0	0	0	0	0	0	0
1804	2	19440220	1	61	152	100	99	0.1	0.2		0.25	1.5	2	0.75	-2	91	15	2	0	0	0	0	0	0	0	0	0	0	0	0	0	10	0	0	0	0	0	0	0	0	0	0	0	0	0	0
1805	2	19621026	1	52	160	97	89	-0.1	-0.1		-4.75	-0.75	75	-4.75	-0.5	96	10	0	0	0	0	0	0	0	0	0	0	0	0	0	0	10	0	0	0	0	0	0	0	0	0	0	0	0	0	0
1806	2	19640410	9	60	154	94	84	0.1	0		-6.5	0	0	-4.25	0	0	20	2	0	0	0	0	0	0	0	0	0	0	0	0	0	10	0	0	0	0	0	0	0	0	0	0	0	0	0	0
1807	2	19580908	7	64	156	102	98.5	1.7	1.7	myopic	-19	-2.5	107	-18	0	0	10	0	0	0	0	0	0	0	0	0	0	0	0	0	0	10	0	0	0	0	0	0	0	0	0	0	0	0	0	0
1808	2	19361021	8	58	153	101	95	0	0		0.25	-0.5	33	0.25	0.25	64	88	8	8	8	8	8	8	8	8	8	8	8	8	8	8	88	8	8	8	8	8	8	8	8	8	8	8	8	8	8
1809	2	19590630	4	79.5	155	98	91	0	0		-0.25	-0.25	100	-0.25	0	0	20	2	0	0	0	0	0	0	0	0	0	0	0	0	0	20	2	0	0	0	0	0	0	0	0	0	0	0	0	0
1810	1	19481203	0	51	154.5	89.5	84	0.32	0.2		0.75	1.25	179	1	1.5	2	14	0	2	0	0	0	0	0	0	0	0	0	0	0	0	20	2	0	0	0	0	0	0	0	0	0	0	0	0	0
1811	1	19721209	3	73	173	100	92.5	-0.1	-0.1		0.25	0	0	0	0.25	91	10	0	0	0	0	0	0	0	0	0	0	0	0	0	0	10	0	0	0	0	0	0	0	0	0	0	0	0	0	0
1812	1	19601205	7	64	171	97	91	0	0.1		0.25	0	0	0.25	0.25	152	37	2	2	1	0	0	0	0	0	0	0	0	0	0	0	37	2	2	0	0	0	0	0	0	0	0	0	0	0	0
1813	1	19521128	20	86	176	111	100	0	0		0.25	0.5	125	0.5	0.25	82	10	0	0	0	0	0	0	0	0	0	0	0	0	0	0	10	0	0	0	0	0	0	0	0	0	0	0	0	0	0
1814	1	19610414	10	92	185	110	98	0.1	0.1		-0.25	-0.25	82	-0.25	-0.5	95	37	2	0	2	0	0	0	0	0	0	0	0	0	0	0	10	0	0	0	0	0	0	0	0	0	0	0	0	0	0
1815	2	19460307	16	56	150	98	90	0.06	0.1		1	1.75	180	0.5	1.75	180	10	0	0	0	0	0	0	0	0	0	0	0	0	0	0	20	2	0	0	0	0	0	0	0	0	0	0	0	0	0
1816	1	19520513	3	68	165	98	81	0.2	0.2		1.25	0.75	163	1.5	0.75	15	20	2	0	0	0	0	0	0	0	0	0	0	0	0	0	10	0	0	0	0	0	0	0	0	0	0	0	0	0	0
1817	1	19461115	5	82	170	111	107	0.96	0.82	myopic	-4.75	-2.75	70	-2.25	-2.75	94	15	2	0	0	0	0	0	0	0	0	0	0	0	0	0	10	0	0	0	0	0	0	0	0	0	0	0	0	0	0
1818	1	19470815	0	62	160	93	89	0.12	0.66		-0.25	-1	78	-2.5	-1	82	10	0	0	0	0	0	0	0	0	0	0	0	0	0	0	10	0	0	0	0	0	0	0	0	0	0	0	0	0	0
1819	1	19591110	0	61	156	98	96	0	0		0	-0.25	51	0	-0.5	141	20	2	0	0	0	0	0	0	0	0	0	0	0	0	0	20	2	0	0	0	0	0	0	0	0	0	0	0	0	0
1820	1	19490211	13	70	170	102	95	1.7	0.4		-7	-1.75	55	0	-2	96	88	8	8	8	8	8	8	8	8	8	8	8	8	8	8	37	2	2	0	0	0	0	0	0	0	0	0	0	0	0
1821	2	19521022	9	64	144	111	108	0.1	0.2		-0.5	-0.25	70	0	-1.25	94	20	2	0	0	0	0	0	0	0	0	0	0	0	0	0	10	0	0	0	0	0	0	0	0	0	0	0	0	0	0
1822	2	19490120	12	51	152.5	94	82	0.4	0.3		0.75	-1.25	168	0	0.75	91	88	8	8	8	8	8	8	8	8	8	8	8	8	8	8	88	8	8	8	8	8	8	8	8	8	8	8	8	8	8
1823	1	19660221	8	67	167	97	90	0.04	0		0.5	-0.75	90	0.75	-1.25	92	10	0	0	0	0	0	0	0	0	0	0	0	0	0	0	20	2	0	0	0	0	0	0	0	0	0	0	0	0	0
1824	2	19550714	5	57	151.5	93	86	0.04	0		0.25	1.25	15	0.5	1	170	37	2	2	0	0	0	0	0	0	0	0	0	0	0	0	47	5	2	2	0	0	0	0	0	0	0	3	0	2	0
1825	2	19430406	9	60	150	99	92	0.34	0.3		1.5	-1.75	27	0.25	0.5	9	15	2	0	0	0	0	0	0	0	0	0	0	0	0	0	15	2	0	0	0	0	0	0	0	0	0	0	0	0	0
1826	2	19390127	15	63	158	103	98	0.5	0.46		-0.25	-0.75	90	0.25	-1.25	83	88	8	8	8	8	8	8	8	8	8	8	8	8	8	8	88	8	8	8	8	8	8	8	8	8	8	8	8	8	8
1827	1	19630329	5	95	169.5	108.5	104	-0.02	-0.02		1	-1.25	88	0.25	0.75	2
1828	1	19501017	2	88.5	182	108	98	0.04	0.02		0.5	-0.75	76	0	-0.5	96	10	0	0	0	0	0	0	0	0	0	0	0	0	0	0	10	0	0	0	0	0	0	0	0	0	0	0	0	0	0
1829	1	19511005	5	64	172	100	98	1.22	0.54	myopic	0.5	-2.5	91	-1	-3.25	75	10	0	0	0	0	0	0	0	0	0	0	0	0	0	0	10	0	0	0	0	0	0	0	0	0	0	0	0	0	0
1830	1	19771004	4	90	172	110	103	1.1	1.1	myopic	-5	-0.5	67	-5	-0.5	78	20	2	0	0	0	0	0	0	0	0	0	0	0	0	0	20	2	0	0	0	0	0	0	0	0	0	0	0	0	0
1831	1	19520529	5	97	175	114	106	0.22	0.06		0.75	-2	81	0.25	-1	109	10	0	0	0	0	0	0	0	0	0	0	0	0	0	0	10	0	0	0	0	0	0	0	0	0	0	0	0	0	0
1832	2	19460401	20	50	149	96	92	0.3	1.16		0.5	2.5	173	0.75	2.25	178	37	2	2	2	0	0	0	0	0	0	0	0	0	0	0	53	2	2	0	4	0	0	0	0	0	0	3	0	2	0
1833	2	19491124	13	61	159	100	90	0.1	0.1		0.5	0.5	172	0.5	0.25	10	15	2	0	0	0	0	0	0	0	0	0	0	0	0	0	20	2	0	0	0	0	0	0	0	0	0	0	0	0	0
1834	2	19460325	3	65	150	104	85	0.1	0.1		1.5	0.75	164	1.25	0.5	16	10	0	0	0	0	0	0	0	0	0	0	0	0	0	0	10	0	0	0	0	0	0	0	0	0	0	0	0	0	0
1835	2	19480314	3	70	166	100	100.5	1.1	0.14		2.5	0.25	119	1	0.5	21	20	2	0	0	0	0	0	0	0	0	0	0	0	0	0	14	0	0	2	0	0	0	0	0	0	0	0	0	0	0
1836	2	19380814	11	75	152	110	104	0.24	0.32		1.5	-2.5	71	1.75	-2.25	100	10	0	0	0	0	0	0	0	0	0	0	0	0	0	0	15	2	0	0	0	0	0	0	0	0	0	0	0	0	0
1837	1	19480316	12	58	167	96	88	1.1	1.1	PDR	-1.5	-1	92	-0.75	-1.25	74	65	6	2	2	2	0	3	0	2	0	0	3	0	2	0	75	4	2	0	4	0	0	3	3	0	3	1	0	0	0
1838	1	19420625	10	70	169.5	99	88.5	0.48	0.5		-3	-2.5	78	-1	-2.25	90	10	0	0	0	0	0	0	0	0	0	0	0	0	0	0	10	0	0	0	0	0	0	0	0	0	0	0	0	0	0
1839	2	19571228	3	46	149	82	87	0.48	0.66		-5	-0.75	50	-0.25	-0.5	79	10	0	0	0	0	0	0	0	0	0	0	0	0	0	0	88	8	8	8	8	8	8	8	8	8	8	8	8	8	8
1840	1	19490820	15	74	170	101	92	1.1	0.48		-3	-1.25	86	-1.75	-1	75	37	2	2	0	0	0	0	0	0	0	0	0	0	0	0	37	2	2	0	0	0	0	0	0	0	0	0	0	0	0
1841	2	19500726	4	67	158	103	92	0.46	0.42		-2.25	-1	78	-1.75	-1.25	98	10	0	0	0	0	0	0	0	0	0	0	0	0	0	0	10	0	0	0	0	0	0	0	0	0	0	0	0	0	0
1842	1	19540202	1	64	167.5	97	88	1.7	0.7	myopic maculopathy	-22	-0.5	159	-20	0	0	10	0	0	0	0	0	0	0	0	0	0	0	0	0	0	88	8	8	8	8	8	8	8	8	8	8	8	8	8	8
1843	2	19521121	15	61	157	93	90	0.16	0.2		0.5	-1.75	99	0.5	-1.5	104	37	2	2	0	1	0	0	0	0	0	0	0	0	0	0	37	2	2	0	0	0	0	0	0	0	0	0	0	0	0
1844	2	19501121	3	55	161	97	92	0	0		0.5	-1.25	95	0	-0.75	85	10	0	0	0	0	0	0	0	0	0	0	0	0	0	0	10	0	0	0	0	0	0	0	0	0	0	0	0	0	0
1845	2	19481022	4	60	150	101	89	0.32	0.5		2.75	2.5	173	2.75	2.25	6	20	2	0	0	0	0	0	0	0	0	0	0	0	0	0	20	2	0	0	0	0	0	0	0	0	0	0	0	0	0
1847	2	19621025	20	58	163	92	84	0.1	0.36		0.75	0.25	158	0.5	0.5	30	63	2	2	0	0	0	0	0	0	0	0	0	7	0	0	63	2	0	0	0	0	0	0	0	0	0	0	7	0	0
1848	2	19520731	7	60	159	97.5	91	0.1	0.1		0.75	0.25	158	0.5	0.25	30	10	0	0	0	0	0	0	0	0	0	0	0	0	0	0	10	0	0	0	0	0	0	0	0	0	0	0	0	0	0
1849	1	19431015	1	72	167	99	88	0.4	0.3		1.75	1.25	10	1.25	1.75	171	20	2	0	0	0	0	0	0	0	0	0	0	0	0	0	20	2	0	0	0	0	0	0	0	0	0	0	0	0	0
1850	2	19580927	10	54	159	93	86	0	0.2		0	0.75	7	0.25	1.25	180	10	0	0	0	0	0	0	0	0	0	0	0	0	0	0	20	2	0	0	0	0	0	0	0	0	0	0	0	0	0
1851	2	19581028	8	54	148	92	83	0	0		0.25	0	0	0	0.5	89	20	2	0	0	0	0	0	0	0	0	0	0	0	0	0	20	2	0	0	0	0	0	0	0	0	0	0	0	0	0
1852	1	19331209	6	65	161	99	96	0.48	1.3		-2.5	-1.25	176	-10.25	-4	177	88	8	8	8	8	8	8	8	8	8	8	8	8	8	8	88	8	8	8	8	8	8	8	8	8	8	8	8	8	8
1853	1	19420831	1	67	156	104	107	0	0.04		0.25	-0.5	96	0	-0.75	72	10	0	0	0	0	0	0	0	0	0	0	0	0	0	0	10	0	0	0	0	0	0	0	0	0	0	0	0	0	0
1854	2	19610126	1	52	156	94	79	0.2	0.1		0	0.25	31	0	-0.25	72	37	2	2	0	0	0	0	0	0	0	0	3	0	2	0	20	2	0	0	0	0	0	0	0	0	0	0	0	0	0
1855	1	19600926	6	82	164	103	100	0.1	0.1		0	-1.25	89	0.25	-0.75	106	37	2	0	2	0	0	0	0	0	0	0	0	0	0	0	37	2	0	2	1	0	0	0	0	0	0	0	0	0	0
1856	2	19490712	5	80	161	111	112	0.44	0.4		0.5	-2.75	83	0.75	-2.25	99	37	2	0	2	0	0	0	0	0	0	0	0	0	0	0	15	2	0	0	0	0	0	0	0	0	0	0	0	0	0
1857	1	19471202	5	60	163.5	96	89	0.22	0.2		1	0.5	131	1.5	0.25	47	10	0	0	0	0	0	0	0	0	0	0	0	0	0	0	10	0	0	0	0	0	0	0	0	0	0	0	0	0	0
1858	1	19490626	5	50	165	86	85	0.1	0		-0.25	-0.5	87	-0.25	-0.25	132	10	0	0	0	0	0	0	0	0	0	0	0	0	0	0	10	0	0	0	0	0	0	0	0	0	0	0	0	0	0
1859	1	19430509	5	78	172	103	98	0.5	0.24		3.5	0	0	2.25	0.75	162	20	2	0	0	0	0	0	0	0	0	0	0	0	0	0	10	0	0	0	0	0	0	0	0	0	0	0	0	0	0
1861	1	19440402	1	73	166	102	94	0.36	0.34		1.25	0.75	172	1.25	1	171	10	0	0	0	0	0	0	0	0	0	0	0	0	0	0	10	0	0	0	0	0	0	0	0	0	0	0	0	0	0
1862	1	19630106	2	103	174	115	108	0.3	0.1		-0.75	-0.5	95	-0.25	-0.25	71	10	0	0	0	0	0	0	0	0	0	0	0	0	0	0	10	0	0	0	0	0	0	0	0	0	0	0	0	0	0
1863	2	19511107	0	64	151	107	102	0.14	0.1		0.75	0.75	160	1.25	1.25	4	10	0	0	0	0	0	0	0	0	0	0	0	0	0	0	10	0	0	0	0	0	0	0	0	0	0	0	0	0	0
1864	2	19500913	9	55	156.5	102	89	0.48	0.56		-4.25	-1.25	146	-4.5	-1	52	10	0	0	0	0	0	0	0	0	0	0	0	0	0	0	10	0	0	0	0	0	0	0	0	0	0	0	0	0	0
1865	1	19510113	2	60	166	92	87	0.1	0.12		0.25	-0.5	65	0.25	-0.75	91	37	2	0	2	0	0	0	0	0	0	0	0	0	0	0	20	2	0	0	0	0	0	0	0	0	0	0	0	0	0
1866	1	19510328	0	70	170	103	95	0.1	0.1		0.25	1.5	180	0.5	0.75	176	10	0	0	0	0	0	0	0	0	0	0	0	0	0	0	10	0	0	0	0	0	0	0	0	0	0	0	0	0	0
1867	1	19520109	3	71	163	99	94	0.6	0.82	myopic	-4.25	-1	3	-8.25	0	0	10	0	0	0	0	0	0	0	0	0	0	0	0	0	0	10	0	0	0	0	0	0	0	0	0	0	0	0	0	0
1868	2	19370719	6	63	145	106	106	0.6	0.26		-0.25	-2	95	2	-2.25	86	10	0	0	0	0	0	0	0	0	0	0	0	0	0	0	10	0	0	0	0	0	0	0	0	0	0	0	0	0	0
1869	1	19470109	4	62	153	96	96	0.1	0.2		0.5	-0.75	67	0	1.25	21	10	0	0	0	0	0	0	0	0	0	0	0	0	0	0	10	0	0	0	0	0	0	0	0	0	0	0	0	0	0
1870	2	19480604	2	60	151	101	99	0.6	0.88	myopic	5.75	2	11	4.5	2.25	175	10	0	0	0	0	0	0	0	0	0	0	0	0	0	0	10	0	0	0	0	0	0	0	0	0	0	0	0	0	0
1871	2	19400501	7	58	141	106	94	0.7	0.68	AMD	-0.5	-1.75	103	0	-1.5	88	31	2	0	0	0	0	0	0	0	0	0	0	0	0	0	37	2	0	2	0	0	0	0	0	0	0	8	0	8	0
1872	2	19490128	2	79	155.5	115	109.5	0.34	0.3		2.5	2.5	178	3.25	3	3	31	2	0	0	0	0	0	0	0	0	0	0	0	0	0	20	2	0	0	0	0	0	0	0	0	0	0	0	0	0
1873	2	19561123	5	45.5	156.5	85	80	1.1	0.48		-5	-1.5	95	-2.25	-0.75	93	13	1	0	0	0	0	0	0	0	0	0	0	0	0	0	10	0	0	0	0	0	0	0	0	0	0	0	0	0	0
1874	1	19370107	5	69	174	100	86	0	0.3		1.5	-2	83	-1.5	-2.5	102	37	2	2	0	0	0	0	0	0	0	0	0	0	0	0	37	2	0	2	0	0	0	0	0	0	0	0	0	0	0
1875	2	19611004	3	50	158	95	86	-0.1	0		-0.25	-0.5	73	-0.25	-0.5	96	10	0	0	0	0	0	0	0	0	0	0	0	0	0	0	20	2	0	0	0	0	0	0	0	0	0	0	0	0	0
1876	2	19450410	3	57.5	152	97	81	0.18	0.1		-1	-0.5	93	-1	-0.5	148	10	0	0	0	0	0	0	0	0	0	0	0	0	0	0	10	0	0	0	0	0	0	0	0	0	0	0	0	0	0
1877	1	19500405	8	64	172	100	103	0.18	0.1		1.25	0.5	164	1	0.25	22	10	0	0	0	0	0	0	0	0	0	0	0	0	0	0	10	0	0	0	0	0	0	0	0	0	0	0	0	0	0
1879	1	19631018	13	87	172			0.3	0.3		-0.75	-0.5	92	-1	-1	0	14	0	0	2	0	0	0	0	0	0	0	0	0	0	0	20	2	0	0	0	0	0	0	0	0	0	0	0	0	0
1880	2	19511101	6	70	162			0.22	0.1		1.5	0.75	15	1	0.25	174	10	0	0	0	0	0	0	0	0	0	0	0	0	0	0	10	0	0	0	0	0	0	0	0	0	0	0	0	0	0
1881	2	19600510	10	60.5	158			0.1	0.02		0.75	-1.25	94	0.5	-1	107	53	4	2	0	0	0	3	0	0	0	0	0	0	0	0	43	3	2	0	0	0	0	0	0	0	0	0	0	0	0
1882	2	19441111	1	67	158			0.6	0.6	myopic	-2.75	-0.5	166	-2.75	-0.75	165	10	0	0	0	0	0	0	0	0	0	0	0	0	0	0	10	0	0	0	0	0	0	0	0	0	0	0	0	0	0
1883	2	19500211	23	55	163	96	93	0.7	1.1	diabetic maculopathy	1.5	0.75	15	1	0.25	174	63	2	2	0	0	0	0	0	0	0	0	0	3	0	0	63	2	2	0	0	0	0	0	0	0	0	3	7	0	0
1884	2	19630512	7	49	159	90	110	0.04	0.02		0.25	-0.75	61	0.5	-1.25	97	37	2	0	2	0	0	0	0	0	0	0	0	0	0	0	10	0	0	0	0	0	0	0	0	0	0	0	0	0	0
1885	2	19380520	1	57	160	94	160	0.3	0.3		1.75	-2.5	89	-0.25	-1.5	107	15	2	0	0	0	0	0	0	0	0	0	0	0	0	0	10	0	0	0	0	0	0	0	0	0	0	0	0	0	0
1886	1	19410910	8	52	152	84	97	0.4	1.6		1	1.25	168	-12.75	-0.5	97	10	0	0	0	0	0	0	0	0	0	0	0	0	0	0	88	8	8	8	8	8	8	8	8	8	8	8	8	8	8
1887	1	19361120	0	68	163	95	100	0.3	0.5		1	1.25	163	1.75	0	0	10	0	0	0	0	0	0	0	0	0	0	0	0	0	0	10	0	0	0	0	0	0	0	0	0	0	0	0	0	0
1888	2	19480118	2	71.5	170	100	87	0.4	0.3		1	2	172	1	1	179	10	0	0	0	0	0	0	0	0	0	0	0	0	0	0	10	0	0	0	0	0	0	0	0	0	0	0	0	0	0
1889	1	19440418	0	67.5	173	98	103	0.5	0.3		2.75	2.75	100	2.25	0.75	153	10	0	0	0	0	0	0	0	0	0	0	0	0	0	0	10	0	0	0	0	0	0	0	0	0	0	0	0	0	0
1890	2	19731227	5	78.5	165	113	81	0.6	0.24		-1.25	1	115	-2	0	0	65	2	2	2	2	0	0	0	3	0	0	0	0	0	0	53	2	0	2	4	0	0	0	0	0	0	0	0	0	0
1891	2	19551105	11	64	160	104	94	0.1	0.1		0.25	-0.75	83	0.5	-0.75	109	20	2	0	0	0	0	0	0	0	0	0	0	0	0	0	10	0	0	0	0	0	0	0	0	0	0	0	0	0	0
1892	1	19421215	1	79	168	102	85	0.3	0.2		1.5	1	178	1.25	0.5	10	10	0	0	0	0	0	0	0	0	0	0	0	0	0	0	10	0	0	0	0	0	0	0	0	0	0	0	0	0	0
1893	1	19561223	18	73	170	96	92	0.1	0.1		1.5	-1.75	84	0	1	10	43	3	2	2	0	0	0	0	0	0	0	0	0	0	0	43	3	2	2	0	0	0	0	0	0	0	0	0	0	0
1894	1	19511103	1	83.5	165	110	112	0.4	0.3		-2.25	-1.75	98	-2.75	-0.75	89	12	2	2	0	0	0	0	0	0	0	0	0	0	0	0	10	0	0	0	0	0	0	0	0	0	0	0	0	0	0
1895	1	19351215	0	68	168	97	94	0.12	0.32		-0.25	-1	94	-1.25	0	0	10	0	0	0	0	0	0	0	0	0	0	0	0	0	0	10	0	0	0	0	0	0	0	0	0	0	0	0	0	0
1896	1	19491213	4	67	170	94	83	0.1	0.1		0.5	0.25	98	0.5	0.75	164	20	2	0	0	0	0	0	0	0	0	0	0	0	0	0	10	0	0	0	0	0	0	0	0	0	0	0	0	0	0
1897	1	19520531	0	79	172	104	92	0.48	1		-1.75	-3.75	88	-9.75	-3.75	85	37	2	0	2	0	0	0	0	0	0	0	0	0	0	0	31	2	0	0	0	0	0	0	0	0	0	0	0	0	0
1898	1	19440511	1	82	157	108	93	0.1	0.1		1	-1.5	116	0.5	1.5	172	10	0	0	0	0	0	0	0	0	0	0	0	0	0	0	10	0	0	0	0	0	0	0	0	0	0	0	0	0	0
1899	1	19720719	4	56	154	94	95	-0.1	-0.1		-1.75	-0.25	151	-2	-0.25	78	10	0	0	0	0	0	0	0	0	0	0	0	0	0	0	20	2	0	0	0	0	0	0	0	0	0	0	0	0	0
1900	1	19541227	20	56	161	91	94	0.1	0.1		0.25	-0.5	105	0.75	-1	93	31	2	0	0	0	0	0	0	0	0	0	0	0	0	0	31	2	0	0	0	0	0	0	0	0	0	0	0	0	0
1901	2	19581115	8	70	168	98	98	1.7	1	diabetic maculopathy	1.5	-3.5	66	1.25	-3.25	95	85	0	0	0	0	0	0	0	0	4	0	8	0	8	0	71	4	2	0	0	0	0	3	0	4	0	3	0	3	0
1902	2	19490521	1	61.5	154	102	92	0.2	0.2		0.25	1	172	0	1.25	5	14	0	2	0	0	0	0	0	0	0	0	0	0	0	0	10	0	0	0	0	0	0	0	0	0	0	0	0	0	0
1903	2	19430503	2	62	155	99	89	0.2	0.2		-8.5	-2.5	90	-8.5	-1	84	10	0	0	0	0	0	0	0	0	0	0	0	0	0	0	10	0	0	0	0	0	0	0	0	0	0	0	0	0	0
1904	2	19590104	5	63	163.5	95	98	0.1	0.1		0.25	-0.5	107	0.25	-0.75	77	10	0	0	0	0	0	0	0	0	0	0	0	0	0	0	15	2	0	0	0	0	0	0	0	0	0	0	0	0	0
1905	2	19530924	5	66	158	97	110	0.94	1.2	myopic	-2.75	-1	111	-6.25	-1	81	10	0	0	0	0	0	0	0	0	0	0	0	0	0	0	10	0	0	0	0	0	0	0	0	0	0	0	0	0	0
1906	2	19500219	3	65	161	94	92	0.14	0.2		1	1.75	175	1.25	1.75	13	10	0	0	0	0	0	0	0	0	0	0	0	0	0	0	10	0	0	0	0	0	0	0	0	0	0	0	0	0	0
1907	2	19570831	10	61	165	89	105	0.1	0.3		-0.5	-2.5	85	0.75	-2.5	94	31	2	0	0	0	0	0	0	0	0	0	0	0	0	0	10	0	0	0	0	0	0	0	0	0	0	0	0	0	0
1908	1	19580725	6	83	173	105	102	0.48	0.5		0	1.25	1	3.5	-5	25	10	0	0	0	0	0	0	0	0	0	0	0	0	0	0	10	0	0	0	0	0	0	0	0	0	0	0	0	0	0
1909	2	19580322	1	69	166	105	87	0.4	0.2		0.25	-2.5	95	0	-1.25	107	10	0	0	0	0	0	0	0	0	0	0	0	0	0	0	10	0	0	0	0	0	0	0	0	0	0	0	0	0	0
1910	1	19470223	10	76.5	179	102	103	0.3	0.2		1	-1.25	76	0	-0.75	81	37	2	2	2	0	0	0	0	0	0	0	0	0	0	0	53	5	2	2	0	0	3	0	0	0	0	0	0	0	0
1911	1	19350503	0	55	158	90	88	1.6	0.7	cataract	0	-1.75	99	-2.5	-0.75	82	88	8	8	8	8	8	8	8	8	8	8	8	8	8	8	88	8	8	8	8	8	8	8	8	8	8	8	8	8	8
1912	2	19600504	1	62	158	98	100	0.5	0.1		0.5	-2.25	71	-0.25	-0.75	65	10	0	0	0	0	0	0	0	0	0	0	0	0	0	0	10	0	0	0	0	0	0	0	0	0	0	0	0	0	0
1913	2	19490816	4	79	177	104	82	0.1	0.1		2	-2.25	98	1.25	-2	86	10	0	0	0	0	0	0	0	0	0	0	0	0	0	0	10	0	0	0	0	0	0	0	0	0	0	0	0	0	0
1914	1	19520528	3	69	158	105	90	0.1	0.3		1.25	1	178	1.25	1	13	10	0	0	0	0	0	0	0	0	0	0	0	0	0	0	10	0	0	0	0	0	0	0	0	0	0	0	0	0	0
1915	2	19430819	15	59	156	95	94	0.1	0.1		0.5	0.75	2	0.75	0.75	167	37	2	2	0	0	0	0	0	0	0	0	0	0	0	0	15	2	0	0	0	0	0	0	0	0	0	0	0	0	0
1916	2	19441111	3	82.5	168	97	102	0.8	0.2		2.5	0.5	180	2.25	0.25	42	10	0	0	0	0	0	0	0	0	0	0	0	0	0	0	13	1	0	0	0	0	0	0	0	0	0	0	0	0	0
1917	2	19550531	10	65	166	94	102	0.3	0.3		1.75	0.75	171	1.75	0.25	64	15	2	0	0	0	0	0	0	0	0	0	0	0	0	0	31	2	0	0	0	0	0	0	0	0	0	0	0	0	0
1918	1	19531208	7	67	165	93	90	0.4	0.1		-5.75	-1.75	87	-4.5	-0.5	83	10	0	0	0	0	0	0	0	0	0	0	0	0	0	0	10	0	0	0	0	0	0	0	0	0	0	0	0	0	0
1919	2	19361225	10	78	175	103	90	0.5	0.4		0	-2.5	67	0.5	-1.75	96	10	0	0	0	0	0	0	0	0	0	0	0	0	0	0	10	0	0	0	0	0	0	0	0	0	0	0	0	0	0
1920	1	19560909	3	79.5	175	107	94	0.3	0.34		0.25	1.25	169	1.75	-2	102	12	2	0	0	0	0	0	0	0	0	0	7	0	0	0	13	1	0	0	0	0	0	0	0	0	0	0	0	0	0
1921	1	19500328	14	68	169	97	88	0.1	0.1		0.75	-1.25	85	0	0.25	178	31	2	0	0	0	0	0	0	0	0	0	0	0	0	0	15	2	0	0	0	0	0	0	0	0	0	0	0	0	0
1922	1	19460409	0	86	180	101	103	0.14	0.3		-1	-1	28	-1.5	-0.75	148	13	0	0	0	1	0	0	0	0	0	0	0	0	0	0	10	0	0	0	0	0	0	0	0	0	0	0	0	0	0
1923	1	19460805	2	88	165	112	122	0.1	0.2		0.5	-0.75	91	-1.25	-1	56	10	0	0	0	0	0	0	0	0	0	0	0	0	0	0	10	0	0	0	0	0	0	0	0	0	0	0	0	0	0
1924	1	19540906	0	73	170	96	100	0.1	0.1		0.5	-1	99	0.75	-1	65	10	0	0	0	0	0	0	0	0	0	0	0	0	0	0	10	0	0	0	0	0	0	0	0	0	0	0	0	0	0
1925	2	19530716	2	83	173	105	94	0	0.1		0	0.25	160	0	-0.75	104	37	2	2	0	0	0	0	0	0	0	0	0	0	0	0	10	0	0	0	0	0	0	0	0	0	0	0	0	0	0
1926	2	19650922	0	54	162	94	101	0	-0.08		0.5	-1	8	0.5	-1	2	10	0	0	0	0	0	0	0	0	0	0	0	0	0	0	10	0	0	0	0	0	0	0	0	0	0	0	0	0	0
1928	2	19410623	11	69	159	106	94	0.4	0.6		1	1	154	1.75	0.25	63	10	0	0	0	0	0	0	0	0	0	0	0	0	0	0	10	0	0	0	0	0	0	0	0	0	0	0	0	0	0
1929	1	19700720	4	68	158	101	100	0	0.1		0	0.5	175	0	0.75	19	37	2	0	2	0	0	0	0	0	0	0	0	0	0	0	37	2	0	2	0	0	0	0	0	0	0	0	0	0	0
1930	2	19500924	10	97	174	112	102	0.5	0.1		-4	-1.5	112	-3.5	-1.5	75	10	0	0	0	0	0	0	0	0	0	0	0	0	0	0	10	0	0	0	0	0	0	0	0	0	0	0	0	0	0
1931	1	19550421	2	65	157	108	94	0.3	0.1		1	-2.5	77	0.5	0.5	10	15	2	0	0	0	0	0	0	0	0	0	0	0	0	0	14	2	2	0	0	0	0	0	0	0	0	0	0	0	0
1932	2	19460603	3	52	157	91	107	0.1	0.2		1	-1.75	93	1.5	-2.25	94	15	2	0	0	0	0	0	0	0	0	0	0	0	0	0	15	2	0	0	0	0	0	0	0	0	0	0	0	0	0
1933	1	19670129	12	64	153	98	90	0	0.1		0.25	1.25	7	0	1.5	174	31	2	0	0	0	0	0	0	0	0	0	0	0	0	0	43	2	2	2	2	0	0	0	0	0	0	0	0	0	0
1934	1	19561031	16	73	174	98	105	1.7	1.7	cataract							88	8	8	8	8	8	8	8	8	8	8	8	8	8	8	88	8	8	8	8	8	8	8	8	8	8	8	8	8	8
1935	1	19480709	0	60	151	99	97	0.14	0.16		1.5	1.25	173	1	2	1	10	0	0	0	0	0	0	0	0	0	0	0	0	0	0	10	0	0	0	0	0	0	0	0	0	0	0	0	0	0
1936	2	19560905	12	60	152	97	98	0.8	0.9	myopic	-1.75	-1.25	89	-2.25	-1.75	84	31	2	0	0	0	0	0	0	0	0	0	0	0	0	0	31	2	0	0	0	0	0	0	0	0	0	0	0	0	0
1937	2	19570406	2	67	171	98	93	0.2	0.2		1.25	-3	37	0.75	-1	136	13	1	0	0	0	0	0	0	0	0	0	0	0	0	0	10	0	0	0	0	0	0	0	0	0	0	0	0	0	0
1938	2	19440411	0	65	165	101	109	0.4	0.2		0.25	1.75	175	0	1.25	13	12	2	2	0	0	0	0	0	0	0	0	7	0	0	0	10	0	0	0	0	0	0	0	0	0	0	0	0	0	0
1939	2	19580128	7	70	173	100	103	0	0		0.25	0.75	116	0.5	0.25	55	10	0	0	0	0	0	0	0	0	0	0	0	0	0	0	10	0	0	0	0	0	0	0	0	0	0	0	0	0	0
1940	2	19540714	8	76	159	108	81	0.6	0.6	myopic	1	-1.25	98	1	-3.25	89	71	4	2	0	0	0	0	3	0	4	0	0	0	0	0	53	2	2	0	4	0	2	0	0	0	0	0	0	0	0
1941	1	19640623	7	68	169	97	101	1.6	1.6	myopic maculopathy	-22.25	-1.5	64	-21	-1	90	10	0	0	0	0	0	0	0	0	0	0	0	0	0	0	10	0	0	0	0	0	0	0	0	0	0	0	0	0	0
1942	1	19380610	10	82	167	104	94	0.3	0.28		2	0.5	155	1	0.25	167	10	0	0	0	0	0	0	0	0	0	0	0	0	0	0	10	0	0	0	0	0	0	0	0	0	0	0	0	0	0
1943	1	19570625	20	72	163	105	100	0.4	0.3		1.25	-2	87	1.75	-2.25	87	53	6	2	2	0	0	0	0	0	0	0	3	0	3	0	53	6	2	2	2	0	0	0	0	0	0	3	0	3	0
1945	1	19351220	4					0.3	0.5		0	1.25	12	1	-1.25	90	10	0	0	0	0	0	0	0	0	0	0	0	0	0	0	10	0	0	0	0	0	0	0	0	0	0	0	0	0	0
1946	1	19491027	1	79	173	104	97	0	0.1		1	-1.25	83	0.25	0.5	163	10	0	0	0	0	0	0	0	0	0	0	0	0	0	0	10	0	0	0	0	0	0	0	0	0	0	0	0	0	0
1948	1	19551114	10					0.5	0.48		0	1.25	140	1	0.5	1	10	0	0	0	0	0	0	0	0	0	0	0	0	0	0	10	0	0	0	0	0	0	0	0	0	0	0	0	0	0
1949	2	19390928	12	72	168	102	96	0.8	0.92	myopic	-5.25	-0.5	109	-4.75	-1	139	15	2	2	0	0	0	0	0	0	0	0	0	0	0	0	10	0	0	0	0	0	0	0	0	0	0	0	0	0	0
1950	1	19321114	10	60	153	103	98	0.6	0.2		2	-3.25	75	0	1.75	1	10	0	0	0	0	0	0	0	0	0	0	0	0	0	0	15	2	0	0	0	0	0	0	0	0	0	0	0	0	0
1951	2	19350428	9	71.5	181	102	96	0.8	0.7	cataract				1	2.5	171	88	8	8	8	8	8	8	8	8	8	8	8	8	8	8	88	8	8	8	8	8	8	8	8	8	8	8	8	8	8
1952	1	19401227	10	65	155	105	94	0.3	0.4		0	-0.5	73	0.5	-0.75	99	10	0	0	0	0	0	0	0	0	0	0	0	0	0	0	10	0	0	0	0	0	0	0	0	0	0	0	0	0	0
1953	1	19470321	3	49	152	90	96	0.1	0.1		0	-0.25	17	-0.25	-0.25	100	10	0	0	0	0	0	0	0	0	0	0	0	0	0	0	10	0	0	0	0	0	0	0	0	0	0	0	0	0	0
1955	1	19490809	28	65	160	100	97	0.2	0.2		0.75	0.75	1	0.75	-1	136	31	2	0	0	0	0	0	0	0	0	0	0	0	0	0	31	2	0	0	0	0	0	0	0	0	0	0	0	0	0
1956	2	19590420	0	63.5	168	100	93	0.48	0.6		2.5	1.75	3	2.5	1.25	172	10	0	0	0	0	0	0	0	0	0	0	0	0	0	0	10	0	0	0	0	0	0	0	0	0	0	0	0	0	0
1957	1	19520116	3	65	151	100	88	0.2	0.2		-1	-1	87	-0.5	-1	67	10	0	0	0	0	0	0	0	0	0	0	0	0	0	0	15	2	0	0	0	0	0	0	0	0	0	0	0	0	0
1958	1	19521228	1	77	155	109	106	0.1	0.1		0.25	0.5	157	0	0.75	1	10	0	0	0	0	0	0	0	0	0	0	0	0	0	0	10	0	0	0	0	0	0	0	0	0	0	0	0	0	0
1960	1	19540910	3	43	144	99	104	0.1	0.1		0.25	0.75	108	0.5	0.25	112	20	2	0	0	0	0	0	0	0	0	0	0	0	0	0	10	0	0	0	0	0	0	0	0	0	0	0	0	0	0
1961	1	19370915	10	50	169	94	93	0.3	0.82		0.75	0.75	36	1.5	1	10	10	0	0	0	0	0	0	0	0	0	0	0	0	0	0	10	0	0	0	0	0	0	0	0	0	0	0	0	0	0
1962	1	19501008	0	66	145	98	95	0	0		0.5	-0.75	96	0.5	0.25	6	10	0	0	0	0	0	0	0	0	0	0	0	0	0	0	10	0	0	0	0	0	0	0	0	0	0	0	0	0	0
1963	1	19510130	10	71.5	164	105	96	0.1	0.1		0.75	-1.5	69	0.25	-1.25	76	31	2	0	0	0	0	0	0	0	0	0	0	0	0	0	13	1	0	0	0	0	0	0	0	0	0	0	0	0	0
1964	2	19440423	20	67	167	96	113	1.7	0.48					0	-2	136	10	0	0	0	0	0	0	0	0	0	0	0	0	0	0	10	0	0	0	0	0	0	0	0	0	0	0	0	0	0
1965	2	19560126	20	52	171	93	87	0	-0.1		0.75	0.25	141	0.5	0.25	88	37	2	0	2	0	0	0	0	0	0	0	0	0	0	0	37	2	2	0	0	0	0	0	0	0	0	0	0	0	0
1966	2	19560909	16	64	163	102	96	0.4	0		-1.5	-0.25	52	0.25	0.25	72	10	0	0	0	0	0	0	0	0	0	0	0	0	0	0	10	0	0	0	0	0	0	0	0	0	0	0	0	0	0
1967	2	19550613	2	73	174	93	79	0	0		0	0	0	0	0.25	108	10	0	0	0	0	0	0	0	0	0	0	0	0	0	0	10	0	0	0	0	0	0	0	0	0	0	0	0	0	0
1968	2	19640112	2	63	164	99	82	0	0.1		1	0.25	44	1	0	0	10	0	0	0	0	0	0	0	0	0	0	0	0	0	0	10	0	0	0	0	0	0	0	0	0	0	0	0	0	0
1969	2	19450303	22	79	173	104	110	1	0.8	myopic	-1.75	-2	124	-0.75	-1.5	64	63	2	2	0	0	0	0	0	0	0	0	0	3	0	0	63	2	2	0	0	0	0	0	0	0	0	2	3	0	0
1970	1	19521006	3	69	165	101	108	0.3	0.2		1.75	0.5	175	1.75	0.25	90	15	2	0	0	0	0	0	0	0	0	0	0	0	0	0	10	0	0	0	0	0	0	0	0	0	0	0	0	0	0
1971	1	19481011	14	76	180	106	96	0.2	0.2		0.5	1.5	166	0.75	1.25	1	10	0	0	0	0	0	0	0	0	0	0	0	0	0	0	10	0	0	0	0	0	0	0	0	0	0	0	0	0	0
1972	2	19520916	13	61.5	166	101	77	0.4	0.4		1	0.75	175	1.5	0	0	37	2	2	2	0	0	0	0	0	0	0	0	0	0	0	37	2	2	0	0	0	0	0	0	0	0	0	0	0	0
1973	2	19561219	18	92	168	117	92	1	0.7	cataract	0.75	-3	79	-0.5	-2.75	95	71	2	2	0	0	0	0	0	3	2	0	3	3	3	0	65	2	2	0	0	0	0	0	0	0	0	0	3	0	0
1974	2	19450405	10	87	182	104	93	0.1	1		-0.75	-0.75	73	1	0.25	38	37	2	2	0	0	0	0	0	0	0	0	0	0	0	0	37	2	2	0	0	0	0	0	0	0	0	3	0	3	0
1975	2	19400626	10	68.5	169	94	102	0.8	0.48		1	-2	89	0.5	-1.75	73	10	0	0	0	0	0	0	0	0	0	0	0	0	0	0	10	0	0	0	0	0	0	0	0	0	0	0	0	0	0
1976	2	19501112	12	83	168	103	80	0.3	0.3		0.75	-1	16	1	-1.5	126	10	0	0	0	0	0	0	0	0	0	0	0	0	0	0	15	2	0	0	0	0	0	0	0	0	0	0	0	0	0
1978	2	19500517	6	57	160	94	95	0.1	0.1		0.5	0.25	107	0.75	0.25	41	10	0	0	0	0	0	0	0	0	0	0	0	0	0	0	31	2	0	0	0	0	0	0	0	0	0	0	0	0	0
1979	2	19490816	2	62	157	97	86	0.1	0.1		0.25	0.5	163	0.5	0.25	10	15	2	0	0	0	0	0	0	0	0	0	0	0	0	0	10	0	0	0	0	0	0	0	0	0	0	0	0	0	0
1980	2	19560823	4	78	175	104	94	1	0.9	myopic maculopathy	-19.25	-0.5	60	-21.25	-0.75	83	10	0	0	0	0	0	0	0	0	0	0	0	0	0	0	10	0	0	0	0	0	0	0	0	0	0	0	0	0	0
1982	2	19560228	0	74	160	109	96	0	0.1		0.25	1.5	165	1	0.75	168	10	0	0	0	0	0	0	0	0	0	0	0	0	0	0	10	0	0	0	0	0	0	0	0	0	0	0	0	0	0
1983	2	19580509	6					1.4	0.1		-13.5	-0.75	46	-0.5	-1.5	94	15	2	0	0	0	0	0	0	0	0	0	0	0	0	0	10	0	0	0	0	0	0	0	0	0	0	0	0	0	0
1984	1	19580305	3	71.5	181	102	90	-0.1	-0.1		0	0.5	6	0.25	0	0	10	0	0	0	0	0	0	0	0	0	0	0	0	0	0	15	2	0	0	0	0	0	0	0	0	0	0	0	0	0
1985	2	19690625	7	74	159	107	109	0.3	0.2		-0.5	-1.5	2	-1.5	-0.25	142	37	2	2	0	0	0	0	0	0	0	0	0	0	0	0	37	2	2	0	0	0	0	0	0	0	0	0	0	0	0
1986	1	19550523	5	72	162	108	101	0	0.1		0.25	0.75	50	0.75	0.25	108	20	2	0	0	0	0	0	0	0	0	0	0	0	0	0	20	2	0	0	0	0	0	0	0	0	0	0	0	0	0
1987	2	19460826	1	56	159	95	97	0.3	0.2		1.5	1.25	170	1.75	0.75	38	10	0	0	0	0	0	0	0	0	0	0	0	0	0	0	10	0	0	0	0	0	0	0	0	0	0	0	0	0	0
1988	1	19541029	3	75	176	118	112	0.6	0.6	myopic	-7.75	-0.5	81	-0.25	-0.5	20	10	0	0	0	0	0	0	0	0	0	0	0	0	0	0	10	0	0	0	0	0	0	0	0	0	0	0	0	0	0
1989	1	19410124	6	69	173	98	89	0.1	0.1		0.5	1.25	1	1.75	-2	92	10	0	0	0	0	0	0	0	0	0	0	0	0	0	0	13	1	0	0	0	0	0	0	0	0	0	0	0	0	0
1990	2	19420824	15	55	163	95	97	0.3	0.3		1.75	0	0	0	1	96	10	0	0	0	0	0	0	0	0	0	0	0	0	0	0	10	0	0	0	0	0	0	0	0	0	0	0	0	0	0
1992	2	19640505	20	67.5	164.5	99	97	0.06	0		0	1.25	171	0	1.25	180	15	2	0	0	0	0	0	0	0	0	0	0	0	0	0	31	2	0	0	0	0	0	0	0	0	0	0	0	0	0
1993	1	19690721	7	81	163	104	107	0.32	0.2		-1	-0.5	17	-0.75	-0.25	131	10	0	0	0	0	0	0	0	0	0	0	0	0	0	0	10	0	0	0	0	0	0	0	0	0	0	0	0	0	0
1994	2	19390504	2	98	181	114	98	0.3	0.36		2.5	1.5	178	2	1.75	10	15	2	0	0	0	0	0	0	0	0	0	0	0	0	0	10	0	0	0	0	0	0	0	0	0	0	0	0	0	0
1995	2	19441220	10	83	179	100	112	0.2	1.7		0.75	1.75	3	-17.75	-12	176	10	0	0	0	0	0	0	0	0	0	0	0	0	0	0	88	8	8	8	8	8	8	8	8	8	8	8	8	8	8
1996	1	19570324	0	68	158	104	95	0.3	0		-1.25	-0.75	76	0	-0.25	116	10	0	0	0	0	0	0	0	0	0	0	0	0	0	0	10	0	0	0	0	0	0	0	0	0	0	0	0	0	0
1997	1	19540721	5	74	170	104	102	0	0		0.25	-0.75	11	0.25	0.5	173	10	0	0	0	0	0	0	0	0	0	0	0	0	0	0	15	2	0	0	0	0	0	0	0	0	0	0	0	0	0
1998	2	19480106	3	71	162	104	94	0	0		0.25	0.5	10	0.25	0.25	173	31	2	0	0	0	0	0	0	0	0	0	0	0	0	0	31	2	0	0	0	0	0	0	0	0	0	0	0	0	0
1999	1	19491004	3	82	167.5			0.06	0		0.25	-0.5	104	0.25	0.25	165	13	1	0	0	0	0	0	0	0	0	0	0	0	0	0	14	0	0	2	0	0	0	0	0	0	0	0	0	0	0
2000	1	19601220	3	68	168	102	83	0	0.1		0.5	0	0	0.75	0.5	30	20	2	0	0	0	0	0	0	0	0	0	0	0	0	0	10	0	0	0	0	0	0	0	0	0	0	0	0	0	0
2001	2	19570226	10	82	158	112	85	0.1	0.1		-1	0.5	161	-0.5	0	0	20	2	0	0	0	0	0	0	0	0	0	0	0	0	0	20	2	0	0	0	0	0	0	0	0	0	0	0	0	0
2002	2	19471224	17	75	178	104	109	0.5	0.4		-1.25	-1	78	-1.5	-1.5	103	37	2	2	0	0	0	0	0	0	0	0	0	0	0	0	37	2	2	0	0	0	0	0	0	0	0	0	0	0	0
2003	2	19541224	7	79	166	105	90	0.1	0		0	1.5	178	0.25	1	175	10	0	0	0	0	0	0	0	0	0	0	0	0	0	0	10	0	0	0	0	0	0	0	0	0	0	0	0	0	0
2004	2	19451001	12	61.5	160	100	82	0.1	0.1		2	2.25	24	3.25	0.25	179	14	2	2	0	0	0	0	0	0	0	0	0	0	0	0	10	0	0	0	0	0	0	0	0	0	0	0	0	0	0
2005	2	19491013	20	61	165	94	103	0.48	1		-0.25	-2.25	92	-0.25	-2.25	79	63	2	2	0	0	0	0	0	0	0	0	3	3	0	0	63	2	2	0	0	0	0	0	0	0	0	0	3	0	0
2006	2	19531025	14	68	167	101	96	0	0.1		0.5	0.5	4	0.75	0.75	170	37	2	2	0	0	0	0	0	0	0	0	0	0	0	0	37	2	2	0	0	0	0	0	0	0	0	0	0	0	0
2007	1	19480602	6	90	168	108	112	0.18	0.5		1.25	0	0	1.75	0.75	111	15	2	0	0	0	0	0	0	0	0	0	0	0	0	0	10	0	0	0	0	0	0	0	0	0	0	0	0	0	0
2008	2	19570711	10	95	165	116	89	0	0		0.25	0.25	138	0	0	0	43	3	2	2	1	0	0	0	0	0	0	0	0	0	0	47	5	2	2	1	0	0	0	0	0	0	0	0	0	0
2009	2	19581028	3	77	175	98	97	0.1	0.1		-3.5	-0.5	25	-2.75	-1	138	10	0	0	0	0	0	0	0	0	0	0	0	0	0	0	10	0	0	0	0	0	0	0	0	0	0	0	0	0	0
2010	2	19451007	16	62	158	93	103	0.3	0.3		1	1	156	1.25	1.5	170	15	2	0	0	1	0	0	0	0	0	0	0	0	0	0	37	2	0	2	0	0	0	0	0	0	0	0	0	0	0
2011	2	19531003	10	63	158	102	90	0.1	0.1		0	1.25	174	1.25	-1.5	94	37	2	2	0	0	0	0	0	0	0	0	0	0	0	0	37	2	2	0	0	0	0	0	0	0	0	0	0	0	0
2012	2	19460815	6	56.5	155	97	100	0.3	0.3		0.25	2	163	0.25	1.75	15	10	0	0	0	0	0	0	0	0	0	0	0	0	0	0	10	0	0	0	0	0	0	0	0	0	0	0	0	0	0
2013	2	19500108	10	75	164	105	105	0.3	0.18		0.25	1	22	0.5	1	6	53	6	2	2	0	0	0	0	0	0	0	2	0	0	0	53	6	2	2	0	0	0	0	0	0	0	2	0	0	0
2014	1	19650907	5	95	168	114	95	0	0		0.5	-0.75	88	0	-0.5	94	10	0	0	0	0	0	0	0	0	0	0	0	0	0	0	10	0	0	0	0	0	0	0	0	0	0	0	0	0	0
2015	1	19520126	0	64	155	98	85	0	0.1		0.25	-0.75	63	0.5	-1	81	10	0	0	0	0	0	0	0	0	0	0	0	0	0	0	20	2	0	0	0	0	0	0	0	0	0	0	0	0	0
2016	2	19561117	3	80	165	114	93	1.6	0.3					0	-1	90	85	2	2	0	0	0	0	0	0	0	3	0	0	0	0	53	5	2	2	4	0	0	0	0	0	0	0	0	0	0
2017	2	19391217	20	48	155	90	105	0.5	0.3		-3.5	-1.25	79	-4	-1.25	105	10	0	0	0	0	0	0	0	0	0	0	0	0	0	0	10	0	0	0	0	0	0	0	0	0	0	0	0	0	0
2018	2	19540202	11	78	179	99	98	0.1	0		0.75	1	5	0.5	1.25	179	10	0	0	0	0	0	0	0	0	0	0	0	0	0	0	10	0	0	0	0	0	0	0	0	0	0	0	0	0	0
2019	1	19390527	12	65	172	101	103	1.7	0.1		1.25	1.5	3	2.5	0.25	5	31	2	0	0	0	0	0	0	0	0	0	0	0	0	0	31	2	0	0	0	0	0	0	0	0	0	0	0	0	0
2020	2	19590111	3	70	170	98	94	0.1	0.1		1.5	0.25	174	2	0	0	10	0	0	0	0	0	0	0	0	0	0	0	0	0	0	20	2	0	0	0	0	0	0	0	0	0	0	0	0	0
2021	2	19370612	10	76	170	98	90	0.14	0.16		0.75	0.5	0	0.75	0	0	37	2	2	0	0	0	0	0	0	0	0	0	0	0	0	37	2	2	0	1	0	0	0	0	0	0	0	0	0	0
2022	1	19560824	6	66	154	106	119	0.1	0		0.25	-1.5	1	0.25	0.25	66	10	0	0	0	0	0	0	0	0	0	0	0	0	0	0	10	0	0	0	0	0	0	0	0	0	0	0	0	0	0
2023	1	19400717	3	64	152	103	83	0.06	0.06		2.75	0.5	148	3.5	1.25	5	10	0	0	0	0	0	0	0	0	0	0	0	0	0	0	88	8	8	8	8	8	8	8	8	8	8	8	8	8	8
2024	1	19640826	10	62.5	170	96	89	0.3	0.2		0.5	-1.75	85	0	-0.75	109	37	2	2	0	2	0	0	0	0	0	0	0	0	0	0	31	2	0	0	0	0	0	0	0	0	0	0	0	0	0
2025	1	19600302	6	55.5	160	93	97	0	0		0.25	0.75	173	0.25	1.75	3	10	0	0	0	0	0	0	0	0	0	0	0	0	0	0	10	0	0	0	0	0	0	0	0	0	0	0	0	0	0
2026	1	19680117	2	89	174	106	99	0.2	0.3		-1	-0.75	18	-1.25	-0.75	159	31	2	0	0	0	0	0	0	0	0	0	0	0	0	0	15	2	0	0	0	0	0	0	0	0	0	0	0	0	0
2027	2	19510913	10	70.5	164	96	88	0.5	0.2		1	-2.5	83	2	-3.25	98	10	0	0	0	0	0	0	0	0	0	0	0	0	0	0	10	0	0	0	0	0	0	0	0	0	0	0	0	0	0
2028	2	19471208	18	85	176	106	94	0.9	1	myopic	2.25	2.75	65	4.75	1.25	83	31	2	0	0	0	0	0	0	0	0	0	0	0	0	0	31	2	0	0	0	0	0	0	0	0	0	0	0	0	0
2029	2	19511021	10	61	163	97	89	1.1	1.1	myopic	-7	-0.5	123	-7.5	-1.25	135	10	0	0	0	0	0	0	0	0	0	0	0	0	0	0	10	0	0	0	0	0	0	0	0	0	0	0	0	0	0
2030	1	19530317	6	69.5	165	97	98	0	0		0	0.5	158	0.25	-0.5	99	10	0	0	0	0	0	0	0	0	0	0	0	0	0	0	10	0	0	0	0	0	0	0	0	0	0	0	0	0	0
2031	2	19600301	2	81	172	105	89	0.1	0.1		1.75	0.25	168	2	0.25	39	13	1	0	0	0	0	0	0	0	0	0	0	0	0	0	10	0	0	0	0	0	0	0	0	0	0	0	0	0	0
2032	1	19560421	10	60	157	96	107	0	0		0.25	0.75	2	0.5	0.5	13	47	5	2	2	2	0	0	0	0	0	0	0	0	0	0	65	4	2	2	0	0	0	0	2	0	0	0	3	0	0
2033	1	19530906	8	60	157	96	103	0.2	0.2		-0.5	-0.25	114	-0.25	-0.5	92	10	0	0	0	0	0	0	0	0	0	0	0	0	0	0	10	0	0	0	0	0	0	0	0	0	0	0	0	0	0
2034	2	19440105	2	61	157	94	112	1.7	0.1					0.75	0.75	12	88	8	8	8	8	8	8	8	8	8	8	8	8	8	8	10	0	0	0	0	0	0	0	0	0	0	0	0	0	0
2035	1	19480711	2	55	165	93	105	0.2	0.3		0.5	1.5	166	0.5	2.25	7	10	0	0	0	0	0	0	0	0	0	0	0	0	0	0	10	0	0	0	0	0	0	0	0	0	0	0	0	0	0
2036	1	19540721	3	81	172	110	94	0.3	0.1		2	0.25	137	0	-0.25	175	10	0	0	0	0	0	0	0	0	0	0	0	0	0	0	10	0	0	0	0	0	0	0	0	0	0	0	0	0	0
2037	2	19580320	20	75	181	104	87	0.2	0.2		0	0.5	104	0	0	0	43	2	2	0	2	0	0	0	0	0	0	0	0	0	0	37	2	2	0	0	0	0	0	0	0	0	0	0	0	0
2038	1	19590207	6	55	153	94	97	0.1	0.1		0.25	1	2	0	1.25	7	20	2	0	0	0	0	0	0	0	0	0	0	0	0	0	15	2	0	0	0	0	0	0	0	0	0	0	0	0	0
2040	2	19560220	0	66	165	98	93	0.2	0.3		1.75	0.5	15	3	0.75	11	10	0	0	0	0	0	0	0	0	0	0	0	0	0	0	10	0	0	0	0	0	0	0	0	0	0	0	0	0	0
2041	1	19361109	3	73.5	157	106	100	0.4	0.3		0	-1.25	84	0.25	-1.75	95	10	0	0	0	0	0	0	0	0	0	0	0	0	0	0	10	0	0	0	0	0	0	0	0	0	0	0	0	0	0
2042	1	19401116	0	61	163	99	97	0.2	0.3		0.75	1.25	16	1	1.5	165	10	0	0	0	0	0	0	0	0	0	0	0	0	0	0	10	0	0	0	0	0	0	0	0	0	0	0	0	0	0
2043	2	19580319	4	65	151	100	96	0.4	0.9		1	1	2	-1.75	-2.5	96	37	2	2	0	0	0	0	0	0	0	0	0	0	0	0	31	2	1	0	0	0	0	0	0	0	0	0	0	0	0
2045	2	19480110	5					0.1	0.1		0.5	1.5	171	0.5	1.25	174	10	0	0	0	0	0	0	0	0	0	0	0	0	0	0	10	0	0	0	0	0	0	0	0	0	0	0	0	0	0
2046	2	19730206	4	102	174	124	102	0.48	0.7		0.75	1	155	-1.5	-1	29	13	0	1	0	0	0	0	0	0	0	0	0	0	0	0	88	8	8	8	8	8	8	8	8	8	8	8	8	8	8
2047	1	19430714	2	80	177	105	100	0.4	0.3		0	-0.25	89	0	0.75	6	10	0	0	0	0	0	0	0	0	0	0	0	0	0	0	10	0	0	0	0	0	0	0	0	0	0	0	0	0	0
2048	2	19570509	14	68.5	162.5	100	95	0.9	0.8	cataract	-0.75	-1.75	119	0	0.75	67	63	2	2	0	0	0	0	0	0	0	0	1	3	0	0	71	2	2	0	0	0	0	0	0	3	3	1	3	0	0
2049	1	19460420	19	52	161	89	109	1	0.1		-1.5	-1.25	88	1.5	-2	95	12	2	0	0	0	0	0	0	0	0	0	0	0	0	0	10	0	0	0	0	0	0	0	0	0	0	0	0	0	0
2050	1	19640522	17	82	171	107	98	0.48	0.1		-2	-2.25	131	-0.5	-1.75	166	37	2	0	2	0	0	0	0	0	0	0	0	0	0	0	37	2	0	2	0	0	0	0	0	0	0	0	0	0	0
2051	1	19501125	10	52	153	97	97	0.1	0.1		0.5	1.25	4	1	1.5	1	10	0	0	0	0	0	0	0	0	0	0	0	0	0	0	10	0	0	0	0	0	0	0	0	0	0	0	0	0	0
2052	2	19460223	11	76	172	104	89	0.8	0.3		1.75	3.75	162	0.5	4.5	1	10	0	0	0	0	0	0	0	0	0	0	0	0	0	0	10	0	0	0	0	0	0	0	0	0	0	0	0	0	0
2053	1	19620111	0	90	183	111	95	0.2	0.2		0	0.75	1	1	-1.75	84	10	0	0	0	0	0	0	0	0	0	0	0	0	0	0	10	0	0	0	0	0	0	0	0	0	0	0	0	0	0
2054	1	19520924	4	62	152	103	102	0.48	0.6		-11	-0.5	82	-12.25	-0.75	28	20	2	0	0	0	0	0	0	0	0	0	0	0	0	0	10	0	0	0	0	0	0	0	0	0	0	0	0	0	0
2055	2	19570426	14	69	156	97	99	0.48	1.4		0.25	2.75	3	0.5	2	13	64	4	2	0	0	0	0	0	0	0	0	3	3	3	0	64	4	2	0	0	0	0	0	0	0	0	3	3	3	0
2056	2	19540114	1	77	155	109	102	0.2	0.1		0	1.25	176	0.25	1	5	10	0	0	0	0	0	0	0	0	0	0	0	0	0	0	10	0	0	0	0	0	0	0	0	0	0	0	0	0	0

## Sheet: Sheet1
周桂荣	1246	2	19310403092	88	57	148	99.5	92	1.7	0.4	-3.5	5	85	2	-1.5	90	88	8	8	8	8	8	8	8	8	8	8	8	8	8	8	88	8	8	8	8	8	8	8	8	8	8	8	8	8	8
孙玉英	415	2	19310430152	55	66	151.5	108	108	1.18	1.1	0	1	8	0	-0.5	93	37	2	2	0	0	0	0	0	0	0	0	0	0	0	0	10	0	0	0	0	0	0	0	0	0	0	0	0	0	0
张相佐	99	1	19331126201	64	85	165	111	115	0.54	0.64	-2	-1.5	71	-2.5	-1	82	10	0	0	0	0	0	0	0	0	0	0	0	0	0	0	10	0	0	0	0	0	0	0	0	0	0	0	0	0	0
官森林	1487	1	19331128121	74	67	159	108	99	0.36	0.2	-0.5	-1	14	0	0.75	179	15	2	0	0	0	0	0	0	0	0	0	0	0	0	0	31	2	0	0	0	0	0	0	0	0	0	0	0	0	0
黄士好	1852	1	19331209353	72	65	161	99	96	0.5	1.3	-2.5	-1.25	176	-10.25	-4	177	88	8	8	8	8	8	8	8	8	8	8	8	8	8	8	88	8	8	8	8	8	8	8	8	8	8	8	8	8	8
张淑贤	709	2	19331226212	64	59	150	98	97	1.7	1.1				-2.5	-3.75	61																88	8	8	8	8	8	8	8	8	8	8	8	8	8	8
刘荣赞	548	1	19340623295	93	58	150	100	90	1.7	0.44				-0.5	-2.5	90																10	0	0	0	0	0	0	0	0	0	0	0	0	0	0
陈有花	1586	2	19341005094	54	53	141	109	104	0.1	0.7	3.25	-3.5	82	-2	-1.5	83	10	0	0	0	0	0	0	0	0	0	0	0	0	0	0	88	8	8	8	8	8	8	8	8	8	8	8	8	8	8
刘焕芹	60	2	19341024098	69	62	145	108.5	102	0.46	0.44	-5	-2.25	57	-9.75	-2.25	70	31	2	0	0	0	0	0	0	0	0	0	0	0	0	0	15	2	0	0	0	0	0	0	0	0	0	0	0	0	0
黄来云	451	2	19350815276	66	55	150	97	94	1.22	1.14	3	-0.75	53	3.75	-0.75	127	43	4	2	0	0	0	0	0	0	0	0	3	0	2	0	47	5	2	0	0	0	0	0	0	0	0	3	0	2	0
刘永山	1945	1	19351220091						0.3	0.5	0	1.25	12	1	-1.25	90	10	0	0	0	0	0	0	0	0	0	0	0	0	0	0	10	0	0	0	0	0	0	0	0	0	0	0	0	0	0
李春龙	117	1	19360325293	66	66	168	99	96	0.42	0.36	0.25	2.5	170	1.75	-2.25	84	37	2	2	0	0	0	0	0	0	0	0	0	0	0	0	37	2	2	0	0	0	0	0	0	0	0	0	0	0	0
侯玉兰	98	2	19360523202	74	61	153	98.5	96.3	0.36	0.16	0.75	1.25	154	-0.75	-1	80	31	2	0	0	0	0	0	0	0	0	0	0	0	0	0	53	6	0	2	0	0	1	0	0	0	0	0	0	0	0
许士林	1746	1	19361019411	73	72	157	96	95	0.4	0.3	1.25	-1.75	92	0	-1	107	20	2	0	0	0	0	0	0	0	0	0	0	0	0	0	10	0	0	0	0	0	0	0	0	0	0	0	0	0	0
王占顺	2041	1	19361109183	80	73.5	157	106	100	0.4	0.3	0	-1.25	84	0.25	-1.75	95	10	0	0	0	0	0	0	0	0	0	0	0	0	0	0	10	0	0	0	0	0	0	0	0	0	0	0	0	0	0
耿国友	578	1	19370302051	70	94	174	113	110	0.04	0	2	-1.75	67	1.25	-1.25	89	20	2	0	0	0	0	0	0	0	0	0	0	0	0	0	10	0	0	0	0	0	0	0	0	0	0	0	0	0	0
姜进瑞	105	1	19370714291	88	70	170	98.5	94	0.3	1.1	2	2	10	3	1.75	178	10	0	0	0	0	0	0	0	0	0	0	0	0	0	0	31	2	0	0	0	0	0	0	0	0	0	0	0	0	0
朱桂珍	730	2	19371112354	50	73	156	102	114	0.24	0.1	2.75	-1.25	89	2	-0.75	99	37	2	0	2	0	0	0	0	0	0	0	0	0	0	0	31	2	0	0	0	0	0	0	0	0	0	0	0	0	0
何起珍	403	2	19380205092	73	50	150	93	90	0.24	0.26	1.25	2.75	166	1.75	2.25	166	31	2	0	0	0	0	0	0	0	0	0	0	0	0	0	10	0	0	0	0	0	0	0	0	0	0	0	0	0	0
尹艾云	579	2	19391118052	73	66	150	102.5	104	0.4	0.4	2	-2.25	73	2.25	-2	91	37	2	2	8	8	8	8	8	8	8	8	8	8	8	8	31	2	0	0	0	0	0	0	0	0	0	0	0	0	0
柴凤霞	560	2	19401118352	67	74	148	115	112	0.2	0.3	1.5	-0.25	99	-0.5	-1	98	10	0	0	0	0	0	0	0	0	0	0	0	0	0	0	10	0	0	0	0	0	0	0	0	0	0	0	0	0	0
杜荣安	6	2	19401211297	54	71	165.8	95	92	0.16	0.12	0	2.25	14	1	-1.5	79	37	2	2	0	0	0	0	0	0	0	0	0	0	0	0	31	2	0	0	0	0	0	0	0	0	0	0	0	0	0
董恩顺	643	1	19410803271	75	90	178	106	104	0	0.04	2	-0.75	90	2	-0.75	75	31	2	0	1	0	0	0	0	0	0	0	0	0	0	0	20	2	0	0	0	0	0	0	0	0	0	0	0	0	0
李绍英	1259	2	19420525212	80	66	152	110	104	0.1	0.1	-0.75	1.5	171	0	1.5	14	20	2	0	0	0	0	0	0	0	0	0	0	0	0	0	20	2	0	0	0	0	0	0	0	0	0	0	0	0	0
徐秀芝	1726	2	19430329242	80	77	157	108	103	0.4	0.4	1.5	0.5	155	3	0.5	9	88	8	8	8	8	8	8	8	8	8	8	8	8	8	8	10	0	0	0	0	0	0	0	0	0	0	0	0	0	0
王明里	1859	1	19430509063	88	78	172	103	98	0.5	0.24	3.5	0	0	2.25	0.75	162	20	2	0	0	0	0	0	0	0	0	0	0	0	0	0	10	0	0	0	0	0	0	0	0	0	0	0	0	0	0
徐桂英	65	2	19430719052	76	67.5	158.5	99.5	98.5	1.56	0.48	0.5	0.75	142	1.25	0.25	152	10	0	0	0	0	0	0	0	0	0	0	0	0	0	0	10	0	0	0	0	0	0	0	0	0	0	0	0	0	0
刘桂芳	898	2	19440905152	51	64	154	107.5	104	1.1	1.1	8.75	-5.25	158	8.75	-4.75	22	88	8	8	8	8	8	8	8	8	8	8	8	8	8	8	88	8	8	8	8	8	8	8	8	8	8	8	8	8	8
王凤霞	596	2	19441009122	81	62	152.5	102	96	0.28	0.1	1.5	-1.5	40	0.75	-0.25	77	37	2	2	0	0	0	0	0	0	0	0	0	0	0	0	37	2	2	0	0	0	0	0	0	0	0	0	0	0	0
杨春荣	2052	2	19460223332	80	76	172	104	89	0.8	0.3	1.75	3.75	162	0.5	4.5	1	10	0	0	0	0	0	0	0	0	0	0	0	0	0	0	10	0	0	0	0	0	0	0	0	0	0	0	0	0	0
孙桂兰	1832	2	19460401362	65	50	149	96	92	0.3	1.16	0.5	2.5	173	0.75	2.25	178	37	2	2	2	0	0	0	0	0	0	0	0	0	0	0	53	2	2	0	4	0	0	0	0	0	0	3	0	2	0
王维珠	684	2	19460506294	70	49	163	89	91	1.2	1.2	-7.25	-4.5	92	-4.75	-3.25	92	88	8	8	8	8	8	8	8	8	8	8	8	8	8	8	88	8	8	8	8	8	8	8	8	8	8	8	8	8	8
孙振香	642	2	19470314222	68	70	162	108	106	0.04	0.1	1	-0.5	64	1.75	-1.5	111	13	1	0	0	0	0	0	0	0	0	0	0	0	0	0	10	0	0	0	0	0	0	0	0	0	0	0	0	0	0
刘淑臣	228	2	19470317292	82	66.5	150	97	98	0.2	0.18	-0.5	-1.25	90	-0.75	-1.5	96	37	2	0	2	0	0	0	0	0	0	0	0	0	0	0	37	2	0	2	0	0	0	0	0	0	0	0	0	0	0
阎会杰	953	2	19481112298	92	59	153.5	103	102	0.1	0.1	-0.25	-1	93	-0.75	-0.5	75	53	2	2	2	4	0	3	0	0	0	0	0	0	0	0	37	2	2	0	0	0	0	0	0	0	0	2	0	0	0
赵瑞	1576	2	19491207182	91	60	156	104	92	0.62	0.62	-2.5	-0.25	52	-2	-0.75	22	10	0	0	0	0	0	0	0	0	0	0	0	0	0	0	10	0	0	0	0	0	0	0	0	0	0	0	0	0	0
王素芳	869	2	19500126062	73	74	159	104	105	0.38	0.42	-2.25	-0.5	85	-2.25	-0.5	95	37	2	2	0	0	0	0	0	0	0	0	0	0	0	0	37	2	2	0	0	0	0	0	0	0	0	0	0	0	0
汤禹财	1236	1	19500219295	77	86	166.5	110	114	0.06	0.04	0.75	-1.25	169	0	1	104	20	2	0	0	0	0	0	0	0	0	0	0	0	0	0	20	2	0	0	0	0	0	0	0	0	0	0	0	0	0
常金福	1403	1	19500616291	91	64	161	101	91	0.2	0.64	-1.25	1.75	177	-5.75	2.5	13	31	2	0	0	0	0	0	0	0	0	0	0	0	0	0	37	2	0	2	0	0	0	0	0	0	0	0	0	0	0
魏洪兰	430	2	19501107294	81	59	153	97	90	0.5	0.4	1.25	0.5	13	0.75	0.5	145	10	0	0	0	0	0	0	0	0	0	0	0	0	0	0	20	2	0	0	0	0	0	0	0	0	0	0	0	0	0
魏巍	771	2	19510807294	66	66.5	157	99	106	0.5	0.52	0.25	-0.5	82	0.5	-0.5	100	88	8	8	8	8	8	8	8	8	8	8	8	8	8	8	88	8	8	8	8	8	8	8	8	8	8	8	8	8	8
王锦荣	602	2	19511219034	84	69	151	102	94	0	0.02	1.25	-1	82	0	0	0	10	0	0	0	0	0	0	0	0	0	0	0	0	0	0	10	0	0	0	0	0	0	0	0	0	0	0	0	0	0
王光	1957	1	19520116411	80	65	151	100	88	0.2	0.2	-1	-1	87	-0.5	-1	67	10	0	0	0	0	0	0	0	0	0	0	0	0	0	0	15	2	0	0	0	0	0	0	0	0	0	0	0	0	0
迟春兰	781	2	19520205412	60	49	153	89	86.5	-0.08	0.02	0.75	-0.75	57	0	-0.25	77	37	2	0	2	0	0	0	0	0	0	0	0	0	0	0	37	2	0	2	0	0	0	0	0	0	0	0	0	0	0
宋顺洪	309	1	19520823291	89	69	171	96.5	97.5	0.4	1.7	3.75	1.5	110				10	0	0	0	0	0	0	0	0	0	0	0	0	0	0	10	0	0	0	0	0	0	0	0	0	0	0	0	0	0
刘中秋	738	2	19521003212	85	73	167	100	107	0.08	0.02	1.5	-0.5	94	1.5	-0.25	83	20	2	0	0	0	0	0	0	0	0	0	0	0	0	0	20	2	0	0	0	0	0	0	0	0	0	0	0	0	0
王喜元	1156	1	19530201293	91	80	170.5	105	110	-0.08	-0.1	0	0.5	123	0.25	0.25	5	10	0	0	0	0	0	0	0	0	0	0	0	0	0	0	10	0	0	0	0	0	0	0	0	0	0	0	0	0	0
刘志华	806	2	19530315292	62	68	158	104	102	0	0	0.5	-0.5	78	0.75	-1	76	10	0	0	0	0	0	0	0	0	0	0	0	0	0	0	10	0	0	0	0	0	0	0	0	0	0	0	0	0	0
邓美华	1925	2	19530716352	90	83	173	105	94	0	0.1	0	0.25	160	0	-0.75	104	37	2	2	0	0	0	0	0	0	0	0	0	0	0	0	10	0	0	0	0	0	0	0	0	0	0	0	0	0	0
周越萍	538	2	19540410354	82	62	155	101	97	0.02	0.12	-0.75	-1.75	66	0	-1.75	100	37	2	2	2	0	0	0	0	0	0	0	0	0	0	0	37	2	0	2	0	0	0	0	0	0	0	0	0	0	0
钱秀英	1333	2	19540707294	79	78	159	109	99	0.42	0.24	-3	2	169	-2	1.25	10	31	2	0	0	0	0	0	0	0	0	0	0	0	0	0	31	2	0	0	0	0	0	0	0	0	0	0	0	0	0
王碧芳	345	2	19540925292	103	67	157	102	101	0.26	0.26	0.75	-1	64	0.5	-1	116	10	0	0	0	0	0	0	0	0	0	0	0	0	0	0	10	0	0	0	0	0	0	0	0	0	0	0	0	0	0
王福起	1752	1	19541109293	90	75	168	100.5	95	-0.06	-0.02	0	0.5	4	0	0	0	20	2	0	0	0	0	0	0	0	0	0	0	0	0	0	20	2	0	0	0	0	0	0	0	0	0	0	0	0	0
陈树才	786	1	19550409153	93	89	172	109	112	-0.08	-0.08	0.75	0	0	0.75	-0.25	35	10	0	0	0	0	0	0	0	0	0	0	0	0	0	0	20	2	0	0	0	0	0	0	0	0	0	0	0	0	0
梁明燕	1239	2	19550919154	70	74	167	104	95	1.7	0.12	-5.75	-2.25	87	-3.5	-2.25	92																62	2	0	0	0	0	0	0	0	0	0	8	3	8	8
王凤林	571	2	19560614222	116	66.5	157	96	99	1.1	1.1	-8.25	-1.75	61	-4.5	-1	118	43	4	0	2	0	0	0	0	0	0	0	0	0	0	0	43	4	0	2	0	0	0	0	0	0	0	0	0	0	0
祝凤云	1520	2	19561204032	86	55	157	92	80	0.1	0.1	1	1	7	1	1.25	11	31	2	0	0	0	0	0	0	0	0	0	0	0	0	0	37	2	2	0	1	0	0	0	0	0	0	0	0	0	0
尚宝贵	371	1	19561230177	83	102	185.5	109	109	0.4	0.44	-0.5	-0.5	177	-0.25	-0.25	178	37	2	0	2	0	0	0	0	0	0	0	0	0	0	0	31	2	0	0	1	0	0	0	0	0	0	0	0	0	0
马云	1575	2	19571105296	69	64	156.5	105	91	0.02	0.02	0.5	-0.75	88	0.75	-1	101	20	2	0	0	0	0	0	0	0	0	0	0	0	0	0	10	0	0	0	0	0	0	0	0	0	0	0	0	0	0
王晋林	1571	1	19580315151	76	89	174	111	99	0.12	0.1	0.5	1.75	3	0.75	0.75	8	10	0	0	0	0	0	0	0	0	0	0	0	0	0	0	20	2	0	0	0	0	0	0	0	0	0	0	0	0	0
关淑芳	2037	2	19580320294	65	75	181	104	87	0.2	0.2	0	0.5	104	0	0	0	43	2	2	0	2	0	0	0	0	0	0	0	0	0	0	37	2	2	0	0	0	0	0	0	0	0	0	0	0	0
魏丽红	756	2	19600311294	68	50	165	88	88	0.3	0.14	1.25	-3	90	1	-2	88	20	2	0	0	0	0	0	0	0	0	0	0	0	0	0	10	0	0	0	0	0	0	0	0	0	0	0	0	0	0
杨国义	1436	1	19601207291	70	69	166	99	89	0.5	0.7	3	0	0	1.25	2.75	81	53	6	2	2	2	0	0	0	0	0	0	3	0	3	0	43	3	2	2	0	0	0	0	0	0	0	3	0	2	0
赵家兴	1720	1	19610109171	88	90	176	106	106	0	-0.02	-0.5	0	0	0	-0.5	84	10	0	0	0	0	0	0	0	0	0	0	0	0	0	0	10	0	0	0	0	0	0	0	0	0	0	0	0	0	0
陶淑贤	752	2	19610317294	79	59	158	96	97	0.04	0.02	0.5	-1	87	0.75	-1.25	97	10	0	0	0	0	0	0	0	0	0	0	0	0	0	0	20	2	0	0	0	0	0	0	0	0	0	0	0	0	0
郭娟	1158	2	19620112296	86	50	148	96	90	1.1	1.7	-15	-2.5	143	-16.75	-2.5	35	20	2	0	0	0	0	0	0	0	0	0	0	0	0	0	10	0	0	0	0	0	0	0	0	0	0	0	0	0	0
魏茂芹	1290	2	19621225226	92	78	162	103	102	0	0	0.25	-1	85	0.25	-0.5	90	10	0	0	0	0	0	0	0	0	0	0	0	0	0	0	10	0	0	0	0	0	0	0	0	0	0	0	0	0	0
王辉	13	1	19630110297	61	83.5	181.2	101.5	99.5	-0.12	-0.12	-1	-0.25	98	-0.75	-1	79	31	2	0	1	0	0	0	0	0	0	0	0	0	0	0	37	2	0	2	0	0	0	0	0	0	0	0	0	0	0
崔金萍	1732	2	19630616356	92	65	156.5	96	97	0.52	0.52	-2.5	-1	91	-2.75	0.25	99	53	6	2	2	0	0	2	0	0	0	0	0	0	0	0	53	6	2	2	2	0	0	0	0	0	0	2	0	0	0
吕文杰	1241	1	19640424271	91	80	175	102	102	0.2	0.2	-0.5	-1.5	65	-0.75	-1	112	47	5	2	2	0	0	0	0	0	0	0	2	0	0	0	53	6	2	2	0	0	0	0	0	0	0	2	0	0	0
魏巍	1486	2	19640608092	74	55	154	89	81	0.1	0.22	0	-1	95	-0.75	-0.75	17	37	2	2	0	0	0	0	0	0	0	0	0	0	0	0	31	2	0	0	0	0	0	0	0	0	0	0	0	0	0
史旭东	780	1	19680121295	103	93	177	109	108	0.1	0.62	-5	-0.75	179	-5	-0.75	173	37	2	0	2	0	0	0	0	0	0	0	0	0	0	0	37	2	2	0	0	0	0	0	0	0	0	0	0	0	0

## Sheet: Sheet2
206	PDR
179	高度近视
23	白内障
24	白内障
25	AMD
43	PDR
75	ME
174	PDR
219	白内障
284	白内障
301	PDR
342	高度近视
349	白内障
389	高度近视
391	黄斑水肿
404	PDR
405	PDR
406	不确定
451	黄斑水肿
483	白内障
496	白内障
517	白内障
519	ME
548	白内障
635	黄斑病变
744	白内障
813	高度近视
882	弱视
956	白内障
995	PDR
1105	高度近视
1117	高度近视
1159	白内障
1190	白内障
1218	白内障
1248	白内障
1250	白内障
1266	PDR
1336	白内障
1359	白内障
1488	白内障
1542	青光眼
1608	白内障
1613	高度近视
1657	白内障
1661	白内障
1667	高度近视
1669	白内障
1670	白内障
1692	PDR
1760	高度近视
1764	PDR
1776	白内障
1787	白内障
1837	黄斑水肿
1842	高度近视
1901	ME
1911	白内障
1934	白内障
1941	高度近视
1973	ME
1980	高度近视
2048	PDR

## Sheet: Sheet4
medid	AE	AA	INPUTER1	SEX	ID	NATI	NATISP	MOBILE	TELHOME	ADDR	ZIPCODE	VIDEO2	VIDEO2SP	DRHIS	DRDU
1	2013-05-21	1		1	210402193802252910	1			57706987	顺城区柳河街15-1号楼4单元306		1		1	1
2	2013-05-21	2		2	210402196005282926	1			56918001	顺城区新城路西段14-5号楼1单元603		1		1	12
3	2013-05-21	3		2	210404194006023321	1			58293781	顺城区新城路西段6-4号楼2单元201		1		1	10
4	2013-05-21	4		1	210402195303150572	1		15842380733		顺城区新城路西段6号楼5单元701		1		1	12
5	2013-11-29	5		1	210402196306130918	1		15604937255				2		1	8
6	2013-01-14	6		1	210402401211297	1			58306586	顺城区将军堡街四委十一组		1		1	10
7	2013-05-21	7		2	210402194903210028	1			58128275	顺城区延吉南路8-3号楼2单元602		1		1	31
8	2013-05-21	8		2	210402194604042968	1			58876413	顺城区新城路西段14-3号楼3单元401		1		1	0
9	2015-10-28	20	蒋岑	2	210402193808252946	1						1		1	20
10	2013-05-21	9		2	210402194309190044	1			58292916			1		1	4
11	2013-11-29	10		2	210402195801201723	1		13352133155				2		1	6
12	2013-11-29	11		2	210402194411022960	1		13009241019				2		1	7
13	2013-11-29	12		1	210402630110297	1		13841309395				2		1	10
14	2013-11-29	13		2	210402194211163523	1		13364135963				2		1	30
15	2013-11-29	14		2	210402194312040522	1		13842360594				2		1	14
16	2013-11-29	15		1	210402194206090518	1		13842360594				2		1	13
17	2013-11-29	19		1	210402196210021530	1			57735650			2		1	10
18	2013-11-29	16		2	210402196511134141	1		14741260632				2		1	5
19	2013-11-29	17		2	21040219591217414x	1		15141347730				2		1	11
20	2013-11-29	18		2	210402194012150527	1			58119090			2		1	2
21	2013-05-21	20		1	210402195809132996	1		13941308977	57704604			1		1	4
22	2013-05-21	21		2	210402195007122948	1		15904136578	57726925			1		1	6
23	2015-10-28	21	蒋岑	1	210402193506262911	1						1		1	10
24	2015-10-28	22	蒋岑	2	210403194111161826	1						1		1	1
25	2013-05-21	22		2	210404193604203627	1		15698938069				1		1	10
26	2013-05-21	23		1	210403195501252138	1		15041364207				1		1	3
27	2013-01-16	29		2	210402195706162922	1			58117665			1		1	3
28	2013-05-21	25		2	210402193601222969	1		18241394243				1		1	2
29	2013-05-21	26		2	210402195711293003	1		13941338854				1		1	7
30	2013-01-16	27		2	210404194711080321	1			57727172			1		1	4
31	2013-05-21	28		1	210402193712283510	1			58126985	顺城区将军街26号1单元303		1		1	10
32	2013-05-21	29		1	210402194201170519	1			58128682	顺城区新城路西段18-1号楼1单元201		1		1	20
33	2013-05-21	30		2	210402195212303529	1			58127916	顺城区新城路西段16-2号楼3单元701		1		1	13
34	2013-05-21	31		2	210402194203113526	1			58826680	顺城区将军街26号楼2单元302		1		1	7
35	2013-05-21	32		2	210402195412133544	1		13842365946	57700311	顺城区延吉路24号楼7单元402		1		1	20
36	2013-05-21	33		2	210402195605040563	1		15898379258		顺城区将军街26号楼6单元501		1		1	2
37	2013-05-21	34		1	210402194303172910	1		13009252298		顺城区将军街26-3号楼2单元203		1		1	7
38	2013-05-21	35		2	210403193101270928	1		13804134957	57353991	顺城区靖宇街7号楼4单元602		1		1	10
39	2013-05-21	36		2	210402194009142024	1			57800926	顺城区将军街26-3号楼1单元601		1		1	6
40	2013-05-21	37		2	210402193011232921	1		13470556873	53891539	顺城区延吉路22号楼2单元302		1		1	20
41	2013-05-21	61		2	210402193811020548	1			58126179	顺城区新城路西段16-2号楼3单元202		1		1	2
42	2013-05-21	62		2	210402193704243527	1		15042369912		顺城区延吉路16号楼3单元403		1		1	20
43	2015-10-28	29	蒋岑	1	210402196103080714	1						1		1	30
44	2013-05-21	63		2	210402194908282928	1		13842389232	58128961	顺城区靖宇街5-1号楼5单元602		1		1	12
45	2013-11-29	64		2	210402194802130969	2			57726337	顺城区将军街7-2号楼1单元303		1		1	9
46	2013-11-29	65		2	210402194811022927	2			53891313	顺城区靖宇街3号楼5单元303		1		1	28
47	2013-05-21	57		2	210402193601252922	1			57700354	顺城区靖宇街1-1号楼1单元501		1		1	8
48	2013-05-21	58		2	210402194703270923	1		13470540364		顺城区将军街		1		1	30
49	2013-05-21	59		2	210402195105202925	1		13942366607		顺城区将军街		1		1	10
50	2013-05-21	60		2	210402195401102929	1			58129610	顺城区新城路西段18-3号楼2单元302		1		1	25
51	2013-05-21	71		1	210402196309163571	1		13942366607		顺城区梅河路15号楼5单元303		1		1	5
52	2013-05-21	72		1	21040219510905291X	1			57720746	顺城区辉南路9-2号楼3单元104		1		1	4
53	2013-01-21	68		2	210402195012153546	1						1		1	6
54	2013-05-21	74		2	210402193611112966	1			58953230	顺城区辉南路9-2号楼2单元303		1		1	5
55	2013-05-21	75		1	210402194703062219	1			58127585	顺城区延吉路16号楼3单元201		1		1	20
56	2013-11-29	66		1	210402193407232936	2			57722309	顺城区靖宇街5-1号楼1单元202		1		1	7
57	2013-05-21	67		1	210402195403060515	1		13332124428		顺城区将军街		1		1	10
58	2013-05-21	68		2	210402194610222922	1		13842323428	57736232	顺城区将军街26-3号楼2单元203		1		1	4
59	2013-05-21	69		2	210402194711051528	1		18904237780	57702255	顺城区新城路西段24-1号楼4单元102		1		1	20
60	2013-01-21	70		2	210402341024098	1			53866233	顺城区将军街		1		1	4
61	2013-05-21	46		2	210402195007080223	1			57729013	顺城区新城路西段18-3号楼4单元303		1		1	17
62	2013-05-21	45		2	21040219431004282X	1			58766383	顺城区辉南路33号楼2单元203		1		1	3
63	2013-05-21	44		1	210404194605181233	1			58191346	顺城区辉南路46号楼2单元401		1		1	12
64	2013-05-21	43		2	210402193506243526	1			57711402	顺城区将军一街2号楼4单元301		1		1	15
65	2013-11-29	47		2	210402430719052	1			58129038	顺城区将军街		2	身份证未在身边	1	6
66	2013-05-21	38		2	210403194810231520	1			53892661	顺城区靖宇街5号楼4单元601		1		1	8
67	2013-05-21	39		1	210402193809300516	1			58129038	顺城区辉南路		2	非身份证	1	3
68	2013-11-29	40		2	210402194304122923	2			57729896	顺城区辉南路32-1号楼3单元403		1		1	18
69	2013-05-21	41		2	210404194801050329	1			53896660	顺城区新城路西段76-4号楼2单元402		1		1	5
70	2013-05-21	42		2	210402196002290947	1		13624133568		顺城区靖宇街7号楼2单元601		1		1	6
71	2013-05-21	48		2	210402194104173523	1			58893535	顺城区将军街		1		1	1
72	2013-05-21	49		2	210402194610220222	1			57723862			1		1	3
73	2013-05-21	50		2	210402196008090524	1		13188263228				1		1	1
74	2013-05-21	51		1	210404195011281215	1		13050141758		顺城区将军街		1		1	8
75	2013-09-12	146	何欣	2	210402193809112929	1		15242392032				1		1	10
76	2013-05-21	52		2	210402193311092940	1			57730690	顺城区延吉路24号楼3单元203		1		1	9
77	2013-05-21	53		2	210402194301062961	1			57726450	顺城区新城路西段30-2号楼5单元202		1		1	13
78	2013-05-21	54		1	210402195012061510	1			57700233	顺城区靖宇街7-3号楼3单元401		1		1	8
79	2013-05-21	55		2	210402194110113527	1		15241316682		顺城区新城路西段16-2号楼3单元103		1		1	10
80	2013-05-21	56		2	210402193810232928	1			57704709	顺城区新城路西段26号楼5单元303		1		1	3
81	2013-05-21	76		1	210402196205122919	1		13804238723		顺城区柳河街11号楼4单元301		1		1	10
82	2013-05-21	77		2	210402196004123528	1		13942333907		顺城区新城路中段30号楼2单元505		1		1	7
83	2013-05-21	78		2	210402194901214121	1			57727879	顺城区靖宇街1号楼3单元501		1		1	7
84	2013-05-21	79		2	210202195309229168	1			58307348	顺城区靖宇街9号楼1单元403		1		1	13
85	2013-05-21	80		2	210402194904172027	1			57723565	顺城区新城路西段21-1号楼1单元302		1		1	2
86	2013-05-21	81		2	210402193811182926	1			57733685	顺城区柳河街15-1号楼3单元606		1		1	2
87	2013-05-21	82		2	210404195003291229	1			57733491	顺城区新城路西段2号楼3单元301		1		1	4
88	2013-05-21	83		2	210403194211073321	1			53865028	顺城区辉南路1号楼1单元201		1		1	9
89	2013-05-21	84		1	210402194005023538	1			57802708	顺城区延吉路16号楼7单元203		1		1	4
90	2013-05-21	85		2	21040219580216096X	1		15842345583		顺城区将军街		1		1	22
91	2013-11-29	86		2	210402195207274145	2		13904236015		顺城区将军街		1		1	1
92	2013-05-21	87		2	210402193412270929	1			57700885	顺城区新城路西段24-1号楼1单元102		1		1	3
93	2013-05-21	88		2	210402195311222943	1		15304130594		顺城区辉南路43号楼1单元502		1		1	0
94	2013-05-21	89		2	210404195305310624	1		13941366622	57705425	顺城区新城路西段16-2号楼2单元301		1		1	10
95	2013-05-21	90		2	210411194907010441	1			58293582	顺城区新城路西段16-2号楼1单元503		1		1	13
96	2013-05-21	91		1	210402195607272913	1			57700686	顺城区将军街7号楼1单元505		1		1	3
97	2013-05-21	92		2	210402195606102041	1			53892562	顺城区新城路西段16-2号楼2单元702		1		1	6
98	2013-05-21	93		2	210402360523202	1			58117008	顺城区将军街		1		1	20
99	2013-05-21	94		1	210402331126201	1			58117008	顺城区将军街		1		1	2
100	2013-11-29	95		2	210402194208062967	2			57700509	顺城区将军街26-3号楼2单元501		1		1	1
101	2013-05-22	110		2	210402194210012969	1		15134123842		顺城区临江路西段23号楼1单元603		1		1	5
102	2013-05-22	111		1	210402193909173518	1			58128025	顺城区新华一路4号楼5单元404		1		1	3
103	2013-05-22	112		1	210403194106293314	1			57803889	顺城区辉南路33-2号楼4单元402		1		1	6
104	2013-05-22	113		2	210403194603303325	1			57803889	顺城区辉南路33-2号楼4单元402		1		1	8
105	2013-05-22	114		1	210402370714291	1			57725883	顺城区将军街		1		1	2
106	2013-05-22	115		2	210402194201152249	1		15040812995		顺城区梅河路5号楼2单元501		1		1	20
107	2013-05-22	116		2	210402194208011721	1			53864258	顺城区将军街		1		1	20
108	2013-05-22	117		2	220519194904045225	1			58127757	顺城区将军街		1		1	15
109	2013-05-22	118		2	210411194703050628	1			57702232	顺城区将军街		1		1	1
110	2013-05-22	119		1	210402194701052914	1			57702439	顺城区靖宇街7号楼4单元302		1		1	3
111	2013-05-22	101		1	210402193401153516	1			57730878	顺城区延吉路20号楼7单元402		1		1	3
112	2013-09-13	147	何欣	2	210402193901042943	1			58290596			1		1	15
113	2013-05-22	102		1	210402193202062953	1			57701841	顺城区将军街26号楼1单元503		1		1	1
114	2013-05-22	103		1	210402194009153516	1			58307538	顺城区梅河路38号楼3单元401		1		1	17
115	2013-05-22	104		2	210402193609222226	1			57705012	顺城区将军街		1		1	3
116	2013-05-22	105		2	210402193910172926	1		18741350522		顺城区将军街		1		1	3
117	2013-11-29	106		1	210402360325293	1		15841382146		顺城区将军街		1		1	9
118	2013-05-22	107		2	210402195104302967	1			58291576	顺城区靖宇街11号楼3单元403		1		1	17
119	2013-05-22	108		1	210402194910312911	1			58291576	顺城区靖宇街11号楼3单元401		1		1	11
120	2013-05-22	109		1	210402195707042914	1			57727937	顺城区靖宇街5号楼5单元502		1		1	3
121	2013-05-23	126		2	210402193908072926	1			57725587	顺城区浑河北路40号楼4单元103		1		1	7
122	2013-05-23	127		2	210402193409233000	1			57733066	顺城区柳河街11号楼4单元303		1		1	7
123	2013-01-28	128		2	210402195207112920	1		15904135484		顺城区辉南路16号楼4单元101		1		1	12
124	2013-11-29	135		2	210402196409182024	2		13942345943	53891968	顺城区靖宇街7-1号楼1单元103		1		1	7
125	2013-05-23	136		1	210402195007092910	1		13204249207		顺城区延吉路24号楼1单元603		1		1	20
126	2015-10-27	14	蒋岑	1	210402196508132938	1						1		1	4
128	2013-05-23	137		2	210411195006194305	1		15842308837	57725669	顺城区将军街2-4号楼2单元202		1		1	18
129	2013-01-28	138		1	210402195301180911	1		13234135406		顺城区将军街		1		1	4
130	2013-05-23	131		2	210403194703170320	1		15104133281		顺城区靖宇街8号楼1单元501		1		1	2
131	2013-05-23	129		2	210402194006162724	1			57720965	顺城区靖宇街8号楼4单元601		1		1	20
132	2013-05-23	130		2	210402194209071726	1			58128782	顺城区将军街4-2号楼4单元201		1		1	14
133	2013-05-23	121		1	210402194407252712	1		15641337600		顺城区柳河街3-2号楼2单元603		1		1	18
134	2013-05-23	122		2	210402195411142422	1		13804233724		顺城区柳河街4-1号楼4单元601		1		1	12
135	2013-11-29	123		1	210402195610134150	2			57707818	顺城区新城路西段8号楼4单元302		1		1	12
136	2013-05-23	124		2	210402193801022945	1			58307538	顺城区梅河路38号楼3单元401		1		1	5
137	2013-05-23	125		2	210402195610263526	1			57720441	顺城区高山路98-3号楼1单元201		1		1	7
138	2013-05-23	132		2	210411194207020227	1			57803189	顺城区新城路西段18-1号楼2单元402		1		1	4
139	2013-05-23	133		1	210411193712240218	1			57707468	顺城区新城路西段18-1号楼2单元403		1		1	4
140	2013-05-23	134		1	210402196910204119	1			53891998	顺城区怀德路8-2号楼2单元603		1		1	5
141	2013-05-23	141		2	210402194706140542	1			57721520	顺城区新城路西段10-2号楼1单元103		1		1	10
142	2013-01-28	140		1	210402194008194113	1			57800319	顺城区新城路中段3-6号楼4单元602		1		1	13
143	2013-05-23	143		2	210411195107080227	1		13942311363		顺城区梅河路36-1号楼1单元502		1		1	4
144	2013-05-23	144		1	210402194208022957	1			58191963	顺城区柳河街15-1号楼4单元602		1		1	20
145	2013-01-28	143		2	210402193602252940	1			57721494	顺城区靖宇街10号楼3单元201		1		1	10
146	2013-05-23	139		1	210402194201282932	1			57709338	顺城区梅河路25号楼2单元701		1		1	1
147	2013-05-23	140		1	210402194307242939	1			58307418	顺城区辉南路5号楼4单元203		1		1	13
148	2015-10-28	25	蒋岑	2	210402197002242923	1						1		1	10
149	2013-05-23	146		2	210402195004042926	1			58307418	顺城区辉南路5号楼4单元203		1		1	5
150	2013-11-29	147		1	210402195209102910	2		15841344354		顺城区柳河街11号楼4单元402		1		1	4
151	2013-05-23	148		2	210402195803232945	1		15841397165		顺城区梅河路38号楼3单元602		1		1	8
152	2013-01-29	155		2	210402196105242745	1			53890906	顺城区将军街		1		1	12
153	2013-05-23	150		2	210403194811224242	1			58290240	顺城区辉南路18-1号楼1单元103		1		1	7
154	2013-05-23	151		2	210402194711232927	1		15104136280		顺城区辉南路24号楼1单元403		1		1	3
155	2013-01-29	146		2	210402194610060222	1			58293851	顺城区将军街		1		1	1
156	2013-09-13	153		1	210402195309012015	1		13941387850		顺城区辉南路29-1号楼2单元404		1		1	10
157	2013-05-23	154		2	210402194601203320	1			57807387	顺城区将军街		1		1	5
158	2013-01-29	149		2	210402193203022929	1			53892717	顺城区梅河路38号楼2单元103		1		1	10
159	2013-05-23	156		1	210404195401070018	1		13941373259		顺城区新城路西段30号楼1单元703		1		1	10
160	2013-01-29	151		2	210402195408084145	1			58293831	顺城区将军街38号楼3单元203		1		1	8
161	2013-11-29	161		2	210404194712010026	99	回	18642368885		顺城区将军街		1		1	8
162	2013-01-29	162		2	210402194506102947	1			57336920	顺城区辉南路28号楼3单元703		1		1	5
163	2013-05-23	163		2	21040219510108292X	1		13009242025		顺城区辉南路14-1号楼2单元702		1		1	17
164	2013-01-29	161		2	21040219440330292X	1		13304930806		顺城区新城路西段30-2号楼8单元501		1		1	3
165	2013-11-29	159		1	210402194902202915	2			58293922	顺城区梅河路33号楼2单元502		1		1	2
166	2013-11-29	163		2	210402194911292967	99	回		57803796	顺城区将军街8号楼1单元702		1		1	4
167	2013-11-29	170		1	210402195612212917	2		15641315609		顺城区靖宇西街1号楼3单元301		1		1	3
168	2013-05-23	165		2	210421195007162826	1			57701543	顺城区辉南路14-1号楼6单元402		1		2	1
169	2013-05-23	166		2	210403195606010928	1		13050121479		顺城区新城路西段26-2号楼4单元101		1		1	6
170	2013-01-30	173		2	210402195011262249	1		15042384662		顺城区新城路西段30号楼5单元403		1		1	4
171	2013-11-29	168		2	210402194402264124	2			58129650	顺城区新城路西段30号楼2单元603		1		1	14
172	2013-01-30	175		2	210402194501082924	1			57725516	顺城区将军街1号楼3单元201		1		1	4
174	2013-05-23	170		1	210402196402093512	1		15242716134		顺城区辉南路31-1号楼1单元504		1		1	16
175	2013-01-30	171		2	210402195112152946	1			58945514	顺城区辉南路9-2号楼1单元502		1		1	20
176	2013-01-30	165		1	210402195803312910	1		13841326996		顺城区临江路西段29号楼2单元203		1		1	5
177	2013-05-23	173		1	210402195104233535	1			57807171	顺城区延吉南路1-2号楼2单元302		1		1	6
178	2013-01-30	174		2	210402195010293529	1			57724832	顺城区辉南路29号楼2单元402		1		1	8
179	2013-11-29	175		2	210402193909092929	1			57705736	顺城区将军街		1		1	4
180	2013-01-30	169		2	210402195302251523	1		13352131616		顺城区靖宇街西街3号楼2单元201		1		1	10
181	2013-05-23	193		1	210402194909253512	1			57724832	顺城区辉南路29号楼2单元402		1		1	18
182	2013-01-31	194		1	210402194409142410	1			57732587	顺城区辉南路26-1号楼1单元403		1		1	4
183	2013-01-30	178		1	210402195008152911	1			53891606	顺城区梅河路36-1号楼6单元202		1		1	5
184	2013-05-23	178		1	210402196401102974	1		13050138200		顺城区梅河路27号楼1单元204		1		1	2
185	2013-05-23	179		1	210402194811282913	1			57724775	顺城区新城路西段26-2号楼4单元402		1		1	15
186	2013-01-30	179		1	210402196806252938	1		15842312900		顺城区靖宇西街3号楼4单元601		1		1	2
187	2013-01-30	182		2	210403195810204244	1		13130311339		顺城区靖宇街11号楼1单元302		1		1	1
188	2013-01-30	181		2	210402194804151747	1		13030709518		顺城区新城路西段18号楼4单元501		1		1	6
189	2013-05-23	182		1	210402192911302011	1			57725636	顺城区梅河路35号楼5单元303		1		1	1
190	2013-01-30	184		2	210403195602112724	1		13372843521		顺城区将军街		1		1	12
191	2013-05-23	195		1	21040219600503173X	1			58125718	顺城区将军街		1		1	5
192	2013-01-31	189		1	210402196205232915	1		13704136899		顺城区将军街2-6号楼2单元602		1		1	10
193	2013-05-23	186		1	210402194011272936	1			57733270	顺城区新城路西段30-2号楼1单元303		1		1	6
194	2013-05-23	187		1	210402196211192956	1		13604138642		顺城区靖宇西街3号楼3单元303		1		1	10
195	2013-05-23	188		2	210402195903222226	1		13942358655		顺城区梅河路35号楼6单元802		1		1	2
196	2013-01-31	185		2	210402196011122945	1		15842302005		顺城区辉南路9号楼1单元302		1		1	8
197	2013-05-23	190		2	210402195104032944	1		13504236349		顺城区延吉路34号楼2单元603		1		1	2
198	2013-05-23	191		2	21040219371222094X	1			58126059	顺城区浑河北路42-1号楼4单元402		1		1	28
200	2013-01-31	188		1	210402195811302915	1		13019661361		顺城区将军街8号楼1单元604		1		2	0
201	2013-05-23	221		2	210403194708240324	1		15641367374	57721472	顺城区靖宇街6号楼1单元104		1		1	8
202	2013-05-23	222		2	210402195201093546	1			57723249	顺城区浑河北路36号楼4单元602		1		1	7
203	2013-05-23	223		2	210402195412063523	1			53890233	顺城区浑河北路36-2号楼3单元102		1		1	8
204	2013-05-23	224		2	210402194010250946	1			52907285	顺城区浑河北路28号楼2单元402		1		1	1
205	2013-05-23	225		2	210402195005142929	1		15841345383	57721343	顺城区梅河路25号楼4单元603		1		1	15
206	2013-05-23	216		1	210402196112282956	1			58126033	顺城区新城路西段14-5号楼2单元202		1		1	14
207	2013-05-23	217		2	210402195402070949	1		13941387184		顺城区辉南路29-3号楼1单元501		1		1	7
208	2013-05-23	218		1	21041119470605291X	1		15904135484		顺城区辉南路16号楼4单元101		1		1	1
209	2013-05-23	219		2	210403194808270344	1			58290516	顺城区梅河路30号楼3单元302		1		1	8
210	2013-05-23	220		1	210403194509150318	1			58290516	顺城区梅河路30号楼3单元302		1		1	8
211	2013-05-23	231		1	210402194203231514	1		13704138063		顺城区新城路西段30号楼1单元503		1		1	10
212	2013-05-23	232		2	210402195412042984	1			57703390	顺城区临江路西段3号楼2单元201		1		1	13
213	2013-05-23	233		1	210422193808160035	1		18741377167		顺城区将军街		1		1	13
214	2013-05-23	234		2	210402193903030540	1			52908121	顺城区浑河北路30-1号楼1单元301		1		1	11
215	2013-05-23	226		2	210403194606070328	1			58129756	顺城区将军街		1		1	11
216	2013-05-23	227		2	210411194710301229	1			58927371	顺城区辉南路18号楼3单元203		1		1	9
217	2013-05-23	228		2	210402194812260943	1			58127936	顺城区将军街		1		1	13
218	2013-05-23	229		2	210402194903234142	1			52908251	顺城区抚顺城路西段17-1号楼3单元602		1		1	2
219	2015-10-28	24	蒋岑	2	210421194112192627	1						1		1	15
220	2013-05-23	230		2	210402195204282940	1			57802377	顺城区梅河路9号楼2单元703		1		1	5
221	2013-05-23	201		1	21040219640109293X	1		13504233373		顺城区高山路149-1号楼1单元301		1		1	3
222	2013-01-31	197		2	210403195608100329	1		15141361885		顺城区浑河北路72-2号楼1单元103		1		1	5
223	2013-05-23	203		1	210402196003071711	1		15842397144		顺城区梅河路37号楼1单元103		1		1	6
224	2013-05-23	204		1	21040219350815173X	1		15842397144		顺城区将军街		1		1	4
225	2013-05-23	205		2	210404195109011846	1			58129971	顺城区葛布前街16-4号楼3单元503		1		1	22
226	2013-05-23	196		2	210402196708221724	1		13081305558		顺城区延吉南路30-2号楼1单元403		1		1	7
227	2013-01-31	202		2	210402194805282925	1			53893808	顺城区辉南路6-5号楼4单元403号		1		1	3
228	2013-01-31	203		2	210402470317292	1		15841389846		顺城区将军街		1		1	10
229	2013-11-29	199		1	210404194409303619	2			58119949	顺城区临江路西段13号楼1单元601		1		1	15
230	2013-01-31	205		2	210402195505261529	1		13841367070		顺城区浑河北路34号楼1单元502		1		1	4
231	2013-05-23	206		2	210402195207230927	1		18841355861		顺城区浑河北路30-1号楼1单元302		1		1	10
232	2013-05-23	207		2	210402195901201624	1		15898367094		顺城区浑河北路44号楼3单元803		1		1	10
233	2013-11-29	208		2	210402194611062924	2			58127240			1		1	11
234	2013-05-23	209		2	210403193712140620	1			53972906			1		1	13
235	2013-11-29	210		2	210402194909070249	2			57706643			1		1	13
236	2013-05-23	211		2	210402195011192949	1			53892076			1		1	5
237	2013-05-23	212		2	210402195812102966	1		15041328164				1		1	10
238	2013-05-23	213		2	210402193712213520	1			57724833			1		1	17
239	2013-05-23	214		2	210402194710202929	1			57701431			1		1	13
240	2013-05-23	215		2	21040419420407332X	1			58141389			1		1	9
241	2013-11-25	145	杨艺多	2	210402195803193552	2			58125886	辽宁省抚顺市顺城区高山路149-2号楼1单元303		1		1	2
242	2013-11-29	146	杨艺多	1	210402195803193552	2		13204134696		辽宁省抚顺市顺城区浑河北路46-1号楼1单元1103号		1		1	15
243	2013-11-25	147	杨艺多	2	210402193905060268	1			57702986	辽宁省抚顺市新抚区公园五路13号楼4单元301室		1		1	8
244	2013-11-25	148	杨艺多	2	210402195912090544	1		15641351576		辽宁省抚顺市顺城区永安二街2号楼3单元402号		1		1	1
245	2013-11-25	149	杨艺多	1	210402193209132934	1		13504138583		辽宁省抚顺市顺城区梅河路17-2号楼1单元302号		1		1	12
246	2013-11-25	150	杨艺多	2	210403195601032124	1			57709632	辽宁省抚顺市顺城区浑河北路44-1号楼3单元501号		1		1	7
247	2013-11-25	151	杨艺多	2	210402194809063527	1			57733176	辽宁省抚顺市顺城区梅河路13号楼6单元303号		1		1	9
248	2013-11-25	152	杨艺多	1	210402194302083510	1			58307983	辽宁省抚顺市顺城区梅河路13号楼6单元602号		1		1	8
249	2015-10-28	23	蒋岑	2	210402194004072725	1						1		1	7
250	2013-11-25	121	杨艺多	1	21040219400429351x	1			57721243	辽宁省抚顺市顺城区辉南路6号楼2单元301号		1		1	3
251	2013-11-25	122	杨艺多	2	210402194603303521	1			57721243	辽宁省抚顺市顺城区辉南路6号楼2单元301号		1		1	2
252	2013-11-12	123	杨艺多	2	210402193704122928	1			57703456	顺城区新城路西段26号楼1单元402号		1		1	11
253	2013-11-25	124	杨艺多	2	210404194110170022	1			58119583	辽宁省抚顺市望花区彰武二街15号楼5单元203号		1		1	8
254	2013-11-25	125	杨艺多	2	210403194603133926	1			57709640	辽宁省抚顺市顺城区柳河街7号楼3单元203号		1		1	14
255	2013-11-25	126	杨艺多	2	210402195509160960	1			57700187	辽宁省抚顺市顺城区浑河北路38-1号楼3单元401号		1		1	10
256	2013-11-25	127	杨艺多	2	210402194410042943	1			58127333	辽宁省抚顺市顺城区高山路149-3号楼2单元301号		1		1	5
257	2015-10-27	9	蒋岑	1	210402193011242214	1						1		1	5
258	2013-11-25	128	杨艺多	2	21040219450323002x	1			57722137	辽宁省抚顺市顺城区梅河路13号楼4单元502室		1		1	10
259	2013-09-17	121	杨艺多	2	210402194508243524	1			57720420			1		1	6
260	2013-09-17	122	杨艺多	1	210402195106053511	1			57736006			1		1	8
261	2013-09-17	130	杨艺多	2	210102195509253327	1		15841354782		顺城区辉南路8-2号楼11单元703室		1		1	6
262	2013-11-25	132	杨艺多	2	210402194210032943	1			58125078	辽宁省抚顺市顺城区临江路西段11号楼5单元202室		1		1	5
263	2013-11-25	133	杨艺多	2	210411195409170025	1		15898338884		辽宁省抚顺市顺城高山路151号楼1单元301号		1		1	8
264	2013-11-25	134	杨艺多	1	210402194501110016	1			58127368			1		1	20
265	2013-11-25	135	杨艺多	1	210402194301314110	1		13941366570	57720913	辽宁省抚顺市顺城区浑河北路36-2号楼5单元303号		1		1	10
266	2013-11-25	136	杨艺多	2	210402194710132924	1			57733566	辽宁省抚顺市顺城区梅河路15-1号楼1单元202号		1		1	15
267	2013-11-25	137	杨艺多	1	210402194607282916	1		15724684026				1		1	5
268	2013-11-25	138	杨艺多	2	210402196102010527	1		13470519704		辽宁省抚顺市顺城区延吉南路8-3号楼1单元302号		1		1	1
269	2013-11-25	139	杨艺多	2	210402193801242924	1		13941393559				1		1	12
270	2013-11-25	140	杨艺多	1	210402194205072916	1		13941393559		辽宁省抚顺市顺城区高山路149号楼1单元501室		1		1	13
271	2013-11-25	153	杨艺多	2	210402195302020020	1			57704939	辽宁省抚顺市顺城区梅河路26-1号楼4单元401号		1		1	15
272	2013-09-17	121	谷萍	2	21040219480826292X	1			57801610	顺城区靖宇南街2号楼3单元201号		1		1	3
273	2013-09-17	122	谷萍	1	210402194912071752	1			57800745	顺城区辉南路29-3号楼1单元303号		1		1	15
274	2013-09-17	123	谷萍	2	210402194806101727	1						1		1	17
275	2013-09-17	124	谷萍	2	210404195712281242	1						1		1	2
276	2013-09-17	125	谷萍	2	210402194607293527	1			58218889			1		1	15
277	2013-09-17	129	谷萍	2	210402196403100526	1		15698934218				1		1	12
278	2013-09-17	128	谷萍	1	210402194906031519	1						1		1	3
279	2013-09-17	127	谷萍	2	210402195403181720	1			53893733			1		1	6
280	2013-09-17	126	谷萍	1	210402195106121713	1			53893733			1		1	19
281	2013-09-18	141	杨艺多	1	210402195806062910	1			57728544			1		1	10
282	2013-09-18	142	谷萍	1	210402194912122919	1			58293291			1		1	4
283	2013-09-18	143	谷萍	1	210402193708264114	1		18741310539				1		1	12
284	2015-10-27	12	蒋岑	2	210402193301011721	1						1		1	18
285	2013-09-18	144	杨艺多	2	210402194008072925	1			57701384			1		1	16
286	2013-09-18	127	谷萍	1	210402193804202917	1			57701384			1		1	3
287	2013-11-29	128	谷萍	1	210402195601081595	99	回	15242354640				1		1	7
288	2013-09-22	129	谷萍	2	210402194707262947	1		13125511168				1		1	2
289	2013-09-22	131	谷萍	2	210403194903023026	1			53893628			1		1	16
290	2013-09-22	132	谷萍	2	210403194303073388	1			57724629			1		1	6
291	2013-09-22	133	谷萍	2	210402195611230961	1		13942392102				1		1	2
292	2013-09-22	134	谷萍	2	210411193520323042	1			58307989			1		1	2
293	2013-09-23	135	谷萍	2	210402195507291764	1			57721758			1		1	4
294	2013-09-23	136	谷萍	1	210402195902022978	1		13942321438				1		1	6
295	2013-09-23	172	杨艺多	2	21040219400515292x	1			57706633			1		1	6
296	2013-09-23	173	谷萍	2	210402194310252740	1			57732734			1		1	22
297	2013-09-23	174	杨艺多	2	210402196504052041	1		13050170526				1		1	7
298	2013-09-23	175	杨艺多	1	210402195303072017	1		13134138655				1		1	2
299	2013-09-23	176	杨艺多	1	210402194712232917	1						1		1	8
300	2013-09-23	177	杨艺多	1	21040219470814095X	1						1		1	4
301	2013-09-23	178	杨艺多	1	210402196010180916	1		13050184176				1		1	5
302	2013-09-23	179	杨艺多	1	210402194305292916	1			57727578			1		1	25
303	2013-09-24	2	何欣	2	210402195604112924	1		15841356103				1		1	2
304	2013-09-24	180	杨艺多	1	210402193810052919	1		13130323530		顺城区梅河路17-1号楼2单元301号		1		1	1
305	2013-09-24	181	杨艺多	1	210402193510050911	1		15041369653				1		1	6
306	2013-09-24	182	杨艺多	2	210402195804062925	1		13841368452		顺城区辉南路8-2号楼2单元301号		1		1	5
307	2013-09-24	183	杨艺多	1	210402195605142930	1			57705209	顺城区梅河路11号楼2单元502号		1		1	12
308	2013-09-24	184	杨艺多	2	210402193804042925	1			57701811	顺城区梅河路32-2号楼2单元501号		1		1	9
309	2013-09-24	151	谷萍	1	210402520823291	1			57709712			1		1	4
310	2013-09-24	186	杨艺多	2	210402196303083562	1		13842322875		顺城区梅河路11-1号楼1单元401号		1		1	5
311	2013-09-24	187	杨艺多	1	210422194012291413	1				新宾满族自治县响水河子乡响水河子汉族村文明路82-19号		1		1	6
312	2013-09-24	154	谷萍	2	210402195605262043	1		13804934479		顺城区辉南路10号楼4单元701室		1		1	2
313	2013-09-24	155	谷萍	2	210402194209160526	1		15242746963		顺城区临江路西段4号楼3单元101室		1		1	7
314	2013-09-24	156	谷萍	1	210402195305102937	1		13591572873		顺城区梅河路11-1号楼1单元502室		1		1	12
315	2013-09-24	157	谷萍	2	210402194603302924	1		13130326476		顺城区辉南路10号楼3单元703号		1		1	13
316	2013-09-25	158	谷萍	2	210402196210172988	1		15641399289		顺城区靖宇东街4号楼2单元201号		1		1	10
317	2013-09-25	159	谷萍3	1	210402195705013538	1		15941311348		顺城区梅河路13-1号楼5单元203号		1		1	8
318	2013-09-25	160	谷萍	1	210402195111254115	1			57732306	顺城区梅河路26-1号楼5单元203室		1		1	6
319	2013-09-25	161	谷萍	1	210402195504190917	1		13188282638		顺城区靖宇南街2号楼4单元202号		1		1	3
320	2013-09-25	162	谷萍	1	210402196602243570	1		13898331955		顺城区梅河路15-1号楼3单元203号		1		1	1
321	2013-09-25	163	谷萍	1	210402195910062910	1		15042376506		顺城区贵德街1号楼1单元101号		1		1	1
322	2013-09-25	164	谷萍	1	210402195001072919	1		15042357724		顺城区辉南路2号楼2单元402号		1		1	1
323	2013-09-25	165	谷萍	1	210402195902222910	1		15641376777		顺城区临江路西段19号楼3单元601号		1		1	7
324	2013-09-25	166	谷萍	2	210402194912253521	1		15842367378		顺城区临江路东段20号楼4单元203号		1		1	4
325	2013-09-25	167	谷萍	2	210402195005042928	1		13352130783		顺城区辉南路4-1号楼2单元601号		1		1	2
326	2013-09-25	168	谷萍	2	210402195611202987	1			57705209	顺城区梅河路11号楼2单元502号		1		1	22
327	2013-09-25	169	谷萍	2	210403195210261528	1		13130330698	57730059	顺城区将军街2-5号楼3单元402号		1		1	12
329	2013-09-25	170	谷萍	1	210402194103292918	1			58117823	顺城区辉南路3号楼2单元502号		1		1	4
330	2013-09-25	205	杨艺多	2	210402193609092927	1			57727531	顺城区靖宇东街6号楼2单元402号		1		1	3
331	2013-09-25	206	杨艺多	2	210402193007012942	1			57733876	顺城区靖宇东街6号楼3单元301号		1		1	15
332	2013-09-26	207	杨艺多	2	210402194101262926	1			57727531	顺城区靖宇东街6号楼3单元303号		1		1	17
333	2013-09-26	208	杨艺多	2	21040219400131352X	1		15104132954		顺城区梅河路28-1号楼4单元401号		1		1	1
334	2013-09-26	209	杨艺多	1	210402194805122913	1		13125511168		顺城区梅河路15号楼3单元401号		1		1	3
335	2013-09-26	210	杨艺多	2	210402195405241723	2		13358795250		顺城区梅河路30-1号楼3单元102号		1		1	1
336	2013-09-26	211	杨艺多	1	210402194807202917	2			57721037	顺城区辉南路26号楼3单元503号		1		1	1
337	2013-09-26	212	杨艺多	2	210402193612212969	1			53890629	顺城区将军街二十委十七组		1		1	20
338	2013-09-26	213	杨艺多	2	210402194907060047	1			53892378	顺城区梅河路13号楼4单元602号		1		1	10
339	2013-09-26	214	杨艺多	2	210402194407254128	1		15841345590		顺城区新城路中段9号楼3单元501室		1		1	19
340	2013-11-29	215	杨艺多	2	210402194711252928	2			58129387	顺城区贵德街2号楼3单元403号		1		1	10
341	2013-09-27	216	杨艺多	2	210402194310132925	1			57702914	顺城区临江路西段19号楼3单元203号		1		1	4
342	2013-09-27	217	杨艺多	2	210402196401252024	1		15841365399		顺城区辉南路6-5号楼3单元203号		1		1	0
343	2013-09-27	218	杨艺多	2	210405195005191228	2			57724581	顺城区梅河路17-2号楼3单元301号		1		1	10
344	2013-09-27	219	杨艺多	2	210521195612022560	2		15042385607		顺城区梅河路19号楼1单元101号		1		1	6
345	2012-08-18	220	杨艺多	2	210402540925292	1						1		1	5
346	2013-09-27	221	谷萍	2	21040219501223002X	1		13942355701				1		1	2
347	2013-09-28	222	杨艺多	2	210402195201293521	1		13842396664				1		1	12
348	2013-09-28	189	谷萍	2	210402196211012425	1		13236950577				1		1	3
349	2013-09-28	224	杨艺多	2	210404194801260625	1			57706879			1		1	5
350	2013-09-28	225	杨艺多	2	210402195201012988	1			53893587			1		1	7
351	2013-09-28	226	杨艺多	1	210402196005072937	1			58818544			1		1	4
352	2013-09-28	227	杨艺多	2	210402195312020980	1		13274230533				1		1	3
353	2013-09-28	228	杨艺多	2	210402195002280525	1		13322128329				1		1	6
354	2013-09-28	229	杨艺多	2	210402195105242927	1			57735075			1		1	13
355	2013-09-28	230	杨艺多	1	210402194007274111	1		15841345590				1		1	10
356	2013-09-28	231	杨艺多	2	210403195704160065	1		13941386898				1		1	5
357	2013-09-28	232	杨艺多	2	210402195012200920	1			58119398			1		1	3
358	2013-09-28	233	杨艺多	2	210402195104153527	1			57733137			1		1	4
359	2013-09-28	234	杨艺多	2	210403195206120343	1			57706910	顺城区辉南路10号楼11单元301号		1		1	6
360	2013-09-28	235	杨艺多	2	210404196802123322	1		13284138568		顺城区将军四街4号楼3单元202室		1		1	3
361	2013-09-29	236	杨艺多	1	210402195402172937	1		13364135736		顺城区辉南路10-1号楼1单元202号		1		1	5
362	2013-09-29	237	杨艺多	2	210402194504080027	1		15898360469		顺城区梅河路69-1号楼3单元403号		1		1	4
363	2013-09-29	238	杨艺多	1	210402194907183514	1			57118539	顺城区梅河路15-1号楼1单元201号		1		1	1
364	2013-09-29	239	杨艺多	2	210402194205274120	1			57717818			1		1	26
365	2013-09-29	240	杨艺多	2	210402194806070924	1		13842388308				1		1	15
366	2013-09-29	241	杨艺多	2	210402194212291762	1			57718070			1		1	8
367	2013-09-29	242	杨艺多	1	210402196911273511	1		15842329505				1		1	1
368	2013-09-29	243	杨艺多	1	210402195706112917	1		15668534786	56978696			1		1	4
369	2013-09-29	244	杨艺多	1	21040219420702351X	1		13941347422				1		1	3
370	2013-09-29	245	杨艺多	2	210404193805160627	1			57704011			1		1	0
371	2013-09-29	246	杨艺多	1	210402561230177	1		13842325005				1		1	8
372	2013-09-29	247	杨艺多	2	210402195105190565	1			57716411			1		1	7
373	2013-09-30	248	杨艺多	1	210402193904292913	1			58292856			1		1	4
374	2015-10-30	58	蒋岑	1	210404195302180633	1						1		1	10
375	2013-09-30	249	杨艺多	1	210402194512142910	1			57709722			1		1	10
376	2013-09-30	250	谷萍	2	210402194706163525	1		13019662878				1		1	16
377	2013-09-30	251	杨艺多	2	210402194512150945	1		15941394774				1		1	3
378	2013-09-30	252	杨艺多	2	210403194807121822	1		13234132788	57713721			1		1	9
379	2013-09-30	253	杨艺多	1	210402193906170514	1		15714136337				1		1	20
380	2013-09-30	254	杨艺多	2	210402196509032023	1			57318596			1		1	4
382	2013-10-08	256	杨艺多	1	21040219470405291X	1			57721397			1		1	20
383	2013-10-08	257	杨艺多	2	210402196006012020	1		13898314288				1		1	3
384	2013-10-08	258	杨艺多	1	210402192904213512	1			58119812			1		1	5
385	2013-10-08	259	杨艺多	2	210402196010031523	1			57725166			1		1	8
386	2013-10-08	260	杨艺多	2	210402196308132941	99	回	15941390422				1		1	10
387	2013-10-08	261	杨艺多	2	210422194508021521	1			53891636			1		1	10
388	2012-08-21	262	杨艺多	2	210404195104082442	1		15714133718				1		1	12
389	2013-10-08	263	杨艺多	2	210402194503122942	1			57102003			1		1	8
390	2013-10-09	264	杨艺多	2	210402195302240023	1			57120936			1		1	12
391	2013-10-09	265	杨艺多	2	210402193309192942	1			57714087			1		1	24
392	2013-10-09	266	杨艺多	2	210411195104222947	1			57713917			1		1	5
393	2013-10-09	267	杨艺多	2	210402195807272928	1			58293529			1		1	0
394	2012-08-21	268	杨艺多	1	210402195207012911	1		15241319168				1		1	1
395	2013-10-09	269	杨艺多	1	210402195201062918	1		13081301816				1		1	6
396	2013-10-09	270	杨艺多	2	210402195202262946	1			57713697			1		1	7
397	2013-10-14	271	杨艺多	2	210421194303090244	1			58290308			1		1	10
398	2013-10-14	272	杨艺多	2	210403194404141829	1			57190837			1		1	7
399	2013-10-14	273	杨艺多	2	210402195611073003	1		13804139432				1		1	0
400	2013-10-14	274	杨艺多	1	210402196010172959	1		18804137600				1		1	1
401	2013-10-14	275	杨艺多	1	210402195208162938	1		13050112811				1		1	10
402	2013-11-25	276	杨艺多	2	21040219461203292X	1		15242337071				1		1	4
403	2013-10-14	277	杨艺多	2	210402380205092	1		13050169785				1		1	13
404	2013-10-14	278	杨艺多	2	210402194912010925	1		13842384046				1		1	3
405	2013-10-14	279	杨艺多	1	210402195206243515	1		13842384046				1		1	2
406	2013-10-14	280	杨艺多	2	21040319581208280X	1		18241387224				1		1	15
407	2013-10-14	281	杨艺多	2	210402195403212929	1		13324132946				1		1	4
408	2013-10-14	282	杨艺多	1	210402195210132914	1		13941326288				1		1	4
409	2013-10-14	283	杨艺多	2	210402193911022946	1			57703793			1		1	3
410	2013-11-29	284	杨艺多	1	210402197003142932	99	回	15941390422				1		1	5
411	2013-10-14	285	杨艺多	1	210402194805092937	1		13130325499				1		1	2
412	2012-08-22	286	杨艺多	1	210411195701210418	1		15698941446				1		1	15
413	2013-10-14	287	杨艺多	2	21040219611122296X	1		13470554511				1		1	1
414	2013-10-14	288	杨艺多	2	210402195202032921	1			53891194			1		1	1
415	2013-10-14	289	杨艺多	2	210402310430152	1		13224132738				1		1	12
416	2013-10-15	290	杨艺多	2	210402195504192963	1		13188258454				1		1	6
417	2013-10-15	291	杨艺多	1	210402195411082933	1		15842389123				1		1	5
418	2013-10-15	292	杨艺多	2	210402194809222962	1		13624233832				1		1	5
419	2013-10-15	293	杨艺多	2	210402194911242927	1		15668538601				1		1	14
420	2013-10-15	294	杨艺多	2	210402195103140046	1		13591540502				1		1	12
421	2013-10-15	295	杨艺多	2	210402196312232988	1		13591540502				1		1	12
422	2013-10-15	296	杨艺多	1	210402193107190914	1		15242733051				1		1	12
423	2013-10-15	297	杨艺多	2	210402196102242926	1		15898341434				1		1	7
424	2013-10-15	298	杨艺多	2	210402196407193547	1			58818834			1		1	3
425	2013-10-15	299	杨艺多	2	210402195002181746	1			57118458			1		1	16
426	2013-10-15	300	杨艺多	1	21040219471107173X	1			57118458			1		1	13
427	2013-10-15	301	杨艺多	2	210402195606132929	1		15842399779				1		1	12
428	2013-10-16	302	杨艺多	1	210402193703182910	1			57721882			1		1	4
429	2013-10-15	303	杨艺多	2	21040319471215092X	1		13941387293				1		1	6
430	2013-11-29	304	杨艺多	2	210402501107294	1			58199912			1		1	8
431	2013-10-15	305	杨艺多	1	210402194908232939	1			58306101			1		1	5
432	2013-10-15	306	杨艺多	1	210402196202172937	1			58923070			1		1	3
433	2013-10-15	307	杨艺多	2	210402195307273545	1			57733294			1		1	18
434	2013-10-15	308	杨艺多	2	210403194410020329	1			58249705			1		1	18
435	2013-10-15	309	杨艺多	2	210403194205234221	1		15041327819				1		1	3
436	2013-10-15	310	杨艺多	1	210402194808152915	1		15104131614				1		1	15
437	2013-10-15	311	杨艺多	2	210402195008252920	1		15104131614				1		1	9
438	2013-10-16	312	杨艺多	1	210402194803013510	2			58117923			1		1	5
439	2013-10-16	314	杨艺多	2	210402195605012925	1			58128719			1		1	11
440	2013-10-16	313	杨艺多	2	210402195506252966	1		15841344006				1		1	15
441	2013-10-16	315	杨艺多	1	210402194806023538	1			57710400			1		1	12
442	2013-10-16	316	谷萍	1	210404194102160318	1		15724681459				1		1	8
443	2013-10-16	317	杨艺多	2	210402194608300944	1			57713839			1		1	6
444	2013-10-16	318	杨艺多	2	210423194203142628	2			57713799			1		1	15
446	2015-10-27	11	蒋岑	2	210402193803222924	1						1		1	6
447	2013-10-16	320	谷萍	2	211323194708031320	1			53866330			1		1	8
448	2013-10-16	321	杨艺多	1	211323195007271318	1			53866330			1		1	5
449	2013-10-16	322	杨艺多	2	210402194508182928	1		13372846211				1		1	10
450	2013-10-16	323	杨艺多	2	210402195003111766	1		13130315812				1		1	12
451	2013-10-16	324	杨艺多	2	210403350815276	1			58119116			1		1	9
452	2013-10-16	325	杨艺多	2	210402193606072947	1		15040832002				1		1	10
453	2013-11-29	326	杨艺多	1	210402195110073515	2		15941386920				1		1	0
454	2013-10-16	327	杨艺多	1	210402194908212911	1		13941370821				1		1	4
455	2013-10-16	328	杨艺多	1	210402194208074116	1		15842387194				1		1	3
457	2013-10-16	330	杨艺多	2	210402195307152962	1		15134138582				1		1	1
458	2013-10-16	331	杨艺多	2	210402195707012942	1		15304133438				1		1	18
459	2013-11-29	332	杨艺多	1	210402193805183519	99	朝鲜		57711955			1		1	1
460	2013-10-17	333	杨艺多	2	210402193701192947	1			57708402			1		1	5
461	2013-10-17	334	杨艺多	2	210402194004162982	1		13591474656				1		1	4
462	2013-10-17	335	杨艺多	2	210402195102173524	1		13358790917				1		1	14
463	2013-10-17	336	杨艺多	1	210402195012072017	1		13942332295				1		1	5
464	2013-10-17	337	杨艺多	2	210402195208201722	1			58872199			1		1	7
465	2013-10-17	338	杨艺多	2	210402194507011529	1			57708896			1		1	10
466	2013-10-17	339	杨艺多	1	210402194807282937	1		13236952355				1		2	0
467	2013-10-17	340	杨艺多	2	210402195209081726	1			57716220			1		1	6
468	2013-10-17	341	杨艺多	2	210402195509122921	1		13304138827				1		1	18
469	2013-10-17	342	杨艺多	2	210402195102072969	1			57715980			1		1	21
470	2013-10-17	343	杨艺多	1	21040219371212291X	1		18241373364				1		1	4
471	2013-10-17	344	杨艺多	1	210402195510262913	1		13842382786				1		1	6
472	2013-10-17	345	杨艺多	1	21040419540713123X	1			57726206			1		1	10
473	2013-10-17	346	杨艺多	1	210402195212282975	1		13050104497				1		1	18
474	2013-10-17	347	杨艺多	2	210403194210163325	1		13942397908				1		1	2
475	2013-10-17	348	杨艺多	2	210403195412081525	1		13841319270				1		1	10
476	2013-10-17	349	杨艺多	2	210402196007042985	1		13130368147				1		1	6
477	2013-10-17	350	杨艺多	1	210402195509262916	1		13042645829				1		1	10
478	2013-10-17	351	杨艺多	2	210402195610093029	1		15941389182				1		1	15
479	2013-10-17	352	杨艺多	2	210402194804292945	1			53866134			1		1	3
480	2013-10-17	353	杨艺多	2	210402195107182024	1			53866134			1		1	13
481	2013-10-17	354	杨艺多	2	210402194806052945	1			58126258			1		1	1
482	2013-10-17	355	杨艺多	2	210404195103170328	1		13204134416				1		1	5
483	2013-10-18	356	杨艺多	2	210402194201062948	1		13941315068				1		1	17
485	2013-10-18	357	杨艺多	1	210402194502152912	1		13050163996				1		1	2
486	2013-10-18	358	杨艺多	2	210411195311293027	1		15242374812				1		1	20
487	2013-10-18	359	杨艺多	2	210402195302270927	1			58218181			1		1	2
488	2013-10-18	360	杨艺多	1	210402194205101913	1		15041388318				1		1	2
489	2013-11-29	361	杨艺多	1	210402195409092913	2		13804137632				1		1	19
490	2013-11-25	362	杨艺多	2	210402195708072947	1			58749858			1		1	10
491	2013-10-18	363	杨艺多	2	210402193612122963	1			57801537			1		1	20
492	2013-10-18	364	杨艺多	2	210402194208032928	1			57735810			1		1	19
493	2013-10-18	365	杨艺多	2	210402193903192929	1			58306981			1		1	20
494	2013-10-18	366	杨艺多	2	210402196209030544	1			58292085			1		1	20
495	2013-10-18	367	杨艺多	2	210402195102164126	1			57732417			1		1	16
496	2013-10-18	368	杨艺多	2	210402193003303523	1			57700138			1		1	16
497	2013-10-18	369	杨艺多	1	210422194403010818	1		18841344082				1		1	3
498	2013-10-18	371	杨艺多	1	210402194310072918	1			57702914			1		1	5
499	2013-10-18	370	杨艺多	2	210402195504292964	1		13470516409				1		1	6
500	2013-10-18	372	杨艺多	1	210402195503262413	1			58306720			1		1	10
501	2013-10-18	373	杨艺多	1	210421194311011251	1			53866396			1		1	5
502	2013-10-18	374	杨艺多	1	210402196302102995	1		13942309977				1		1	8
503	2013-10-18	375	杨艺多	1	210402195912163010	1		13130359231				1		1	11
504	2013-10-18	376	杨艺多	1	210402195708122916	1			57373516			1		1	8
505	2015-11-02	60	蒋岑	1	210404194405020611	1						1		1	6
506	2013-10-18	377	杨艺多	1	210402195312252933	1		15242398332				1		1	7
507	2013-10-21	378	杨艺多	2	21040219460513002X	1			58123178			1		1	12
508	2013-10-21	379	杨艺多	1	210403195312053316	2		13841381150	57706611			1		1	7
509	2013-10-21	380	杨艺多	1	210402193806272919	1			56944853			1		1	1
511	2013-10-21	381	杨艺多	2	21041119611108062X	1		13524235090				1		1	9
512	2013-10-21	382	杨艺多	2	210411195812290625	1		13841308767				1		1	4
513	2013-10-21	383	杨艺多	2	210403194503010322	1		13941357941				1		1	7
514	2013-10-21	384	杨艺多	2	210402195012114141	1			57584679			1		1	9
516	2013-10-21	385	杨艺多	1	210404196504162411	1		15241330192				1		1	1
517	2013-10-21	386	杨艺多	1	210402194601254113	1			58199279			1		1	12
518	2013-10-21	387	杨艺多	1	210402195811292956	1			57713151			1		1	5
519	2013-10-21	388	杨艺多	2	210402194712033524	1			57713364			1		1	16
520	2013-10-21	389	杨艺多	1	210402194510223514	1			57713364			1		1	13
521	2013-10-21	130	谷萍	1	21040219500608293X	1		13352133864				1		1	0
522	2013-10-21	131	谷萍	2	210411196503311423	1			58125150			1		1	8
523	2013-10-21	132	谷萍	2	210403195008300626	1		13904135587				1		1	6
524	2013-10-21	133	谷萍	2	210402194708253567	1		15841356630				1		1	5
525	2013-10-21	134	谷萍	2	210402195507112025	1			58129348			1		1	2
526	2013-10-21	135	谷萍	2	210404195304231246	1		15141350174				1		1	17
527	2013-10-21	131	谷萍	2	21040219561209296X	1		13050157616				1		1	8
528	2013-10-21	137	谷萍	1	210402195306203510	1			58191238			1		1	8
529	2013-10-21	138	谷萍	1	210402194010130514	1			57705450			1		1	28
530	2013-10-22	139	谷萍	1	210402196306232914	2		13942333426				1		1	10
531	2013-10-22	135	杨艺多	2	210402195704142442	1			58293050			1		1	5
532	2013-10-22	140	杨艺多	2	210402194402102926	1			58898961			1		1	4
533	2013-10-22	142	谷萍	1	210423195410090415	1		18741310231				1		1	15
534	2013-10-22	144	谷萍	2	210402194610152928	1			57802596			1		1	10
535	2013-10-22	143	谷萍	1	210402193609053514	1			58292806			1		1	2
536	2013-10-22	145	谷萍	2	210402195707164129	1		13081332849				1		1	7
537	2013-10-22	146	谷萍	1	21040219631231051X	1		13841380412				1		1	4
538	2013-10-22	147	谷萍	2	210402540410354	1		13591560854				1		1	12
539	2013-10-22	148	谷萍	2	210402195706200562	1		18641387826				1		1	5
540	2013-11-25	149	杨艺多	2	210403196005112122	1		13942345810				1		1	4
541	2013-10-22	150	杨艺多	1	210402195912162990	1		13942345810				1		1	4
542	2013-10-22	151	杨艺多	1	210411193809270018	1			58218990			1		1	10
543	2013-10-22	152	杨艺多	2	210402194410270225	1		13942383642				1		1	22
544	2013-10-22	153	杨艺多	2	210402195709143022	1		15841358365				1		1	2
545	2013-10-22	121	谷萍	2	210402193611173566	1			58127606			1		1	10
546	2013-10-22	123	谷萍	2	210403193811190340	1			57728967			1		1	4
547	2013-10-22	122	谷萍	2	210402194906174122	1		15898352072				1		1	18
548	2013-10-22	125	谷萍	1	210402340623295	1		13358791447				1		1	0
549	2013-10-22	124	谷萍	2	210402197109182721	1		13842326316				1		1	7
550	2013-10-22	126	谷萍	1	210402194302033513	1		15841335541				1		1	5
551	2013-10-22	127	谷萍	2	211221196205042766	1			53891604			1		1	3
552	2013-10-22	128	谷萍	2	210402195507223542	1			57726155			1		1	5
553	2013-10-22	129	谷萍	2	210402195601030544	1		13352130498				1		1	7
554	2013-10-22	131	谷萍	2	210402195203072925	1		13842301898				1		1	14
555	2013-10-22	130	谷萍	1	210402193001020511	2			57702557			1		1	7
556	2013-10-22	132	谷萍	2	21040219640920262X	1			58751075			1		1	2
557	2013-10-23	133	谷萍	2	210402195007074165	1		13941333376				1		1	6
558	2013-10-23	134	谷萍	1	210404195012113010	1			57706922			1		1	20
559	2013-10-23	135	谷萍	2	210402195602262929	1		15668537066				1		1	3
560	2013-10-23	136	谷萍	2	210402401118352	1			57709797			1		1	8
561	2013-10-23	137	谷萍	2	210402193910242947	1			57736506			1		1	12
562	2013-11-25	9	尹玉峰	2	210404194910191227	1			58861031			1		1	10
563	2013-10-23	138	谷萍	1	210402194603272913	1			57723938			1		1	8
564	2013-10-23	140	谷萍	1	210402194509022918	1			57722726			1		1	3
565	2015-10-27	8	蒋岑	2	210402194310194122	1						1		1	14
566	2013-10-23	139	谷萍	1	210402194804012958	1			53892955			1		1	7
567	2013-10-23	141	谷萍	2	210402194803112922	1			53892955			1		1	8
568	2013-10-23	142	谷萍	2	210402196702120228	1			53892005			1		1	6
569	2013-10-23	143	谷萍	1	210402195607283550	1		13841320665				1		1	8
570	2013-10-23	144	谷萍	2	210402194009222948	1			57732576			1		1	2
571	2013-10-23	145	谷萍	2	210402560614222	1		13591548757				1		1	20
572	2013-10-23	146	谷萍	2	210423195103141227	1			57726275			1		1	10
573	2013-10-23	147	谷萍	2	210402193606232744	1			53891396			1		1	4
574	2013-10-23	148	谷萍	2	210402194903163524	1			57705696			1		1	8
575	2013-11-25	149	谷萍	2	210403195306070929	1		13332122331				1		1	20
576	2013-11-25	150	谷萍	2	21040219591004152X	1		13081332899				1		1	10
577	2013-11-25	151	谷萍	1	210402194212242012	99	回	13591549902				1		1	4
578	2013-11-25	152	谷萍	1	210402370302051	1			57890330			1		1	3
579	2013-11-25	153	谷萍	2	210402391118052	1			57890330			1		1	17
580	2013-10-23	3	何欣	1	210402196501230519	1			57890330			1		1	15
581	2013-11-25	154	谷萍	2	210402194403193524	1			57720234			1		1	14
583	2013-11-25	155	谷萍	2	210402197610211522	1		13188258006				1		1	6
584	2013-11-25	156	谷萍	1	210402196212192931	1		13214132115				1		1	3
585	2013-10-23	122	谷萍	2	210404195305081841	1			57733056			1		1	1
586	2013-10-23	121	谷萍	1	210403194002021816	1			57735037			1		1	3
587	2013-10-23	123	谷萍	2	210402194307072925	1		13942304963				1		1	8
588	2013-11-29	124	谷萍	2	210402194910032944	99	回		57722909			1		1	9
589	2013-10-23	125	谷萍	1	210402194609270919	1			52907267			1		1	1
590	2013-10-23	126	谷萍	1	210404194602283314	1			57705185			1		2	0
591	2013-10-23	127	谷萍	1	210402195910053512	1		13842321249				1		1	6
592	2013-10-23	128	谷萍	1	210402193807140918	1		15641303146				1		1	6
593	2013-10-24	129	谷萍	2	210402194401030924	1		15641303146				1		1	12
594	2013-10-23	130	谷萍	1	210402195202212914	1		13009250854				1		1	5
595	2013-10-23	131	谷萍	2	210402194201143529	1		15714236649				1		1	5
596	2013-10-24	132	谷萍	2	210404441009122	1		15604933733				1		1	14
597	2013-10-24	133	谷萍	1	210402195111283514	1			57720155			1		1	20
598	2013-10-24	134	谷萍	1	210402194504230910	2		15042383908	53993465			1		1	0
599	2013-10-24	135	谷萍	2	210404196310040344	1			53971878			1		1	9
600	2013-10-24	136	谷萍	2	210403195007180925	1			53890750			1		1	13
601	2013-10-24	137	谷萍	2	210402193411133586	1			57730661			1		1	16
602	2013-10-24	138	谷萍	2	210404511219034	1			58119007			1		1	3
603	2013-10-24	139	谷萍	1	210404194610013015	1			58119668			1		1	1
604	2013-10-24	143	谷萍	2	210402195301052928	1			58119802			1		1	10
605	2013-10-24	140	谷萍	2	210403196309070021	1			57803598			1		1	1
606	2013-10-24	141	谷萍	1	210402194906242930	1		15898390266				1		1	5
607	2013-10-24	142	谷萍	1	210402194510162918	1		13841344954				1		1	12
608	2013-10-24	144	谷萍	1	21040219371014201X	1			57713220			1		1	5
609	2013-11-29	146	谷萍	1	210402194507252912	1		15841306984				1		1	5
610	2013-10-24	145	谷萍	2	210402195105114124	1			58818805			1		1	4
611	2013-10-24	147	谷萍	2	210404194801022424	1			57707287			1		1	10
612	2013-10-24	149	谷萍	2	210404195707242425	1			57114087			1		1	6
613	2013-10-24	148	谷萍	2	210402194908092980	1			58127821			1		1	14
615	2013-10-24	153	谷萍	2	210402194801182943	1		13130318677				1		1	13
616	2013-10-24	154	谷萍	1	210403195106260912	1		13332122331				1		1	4
617	2013-10-24	150	谷萍	2	210402195403291524	1			53891492			1		1	10
618	2015-10-28	10	蒋岑	2	210402194012272962	1						1		1	5
619	2013-10-24	151	谷萍	2	210402195605222922	99	回	15714134773				1		1	5
620	2013-10-24	152	谷萍	1	210402194710292012	1		15141307866				1		1	12
621	2013-10-25	155	谷萍	1	210402195905080997	1		13841338886				1		1	13
622	2013-10-25	156	谷萍	1	210403195202130616	2		13904936561				1		1	15
623	2013-10-25	157	谷萍	1	210402194112060916	1			57722307			1		1	15
624	2013-10-25	165	谷萍	2	210402195611071745	1		13654232714				1		1	7
625	2013-10-25	158	谷萍	2	210404194511181822	1			58127835			1		1	2
626	2013-10-25	159	谷萍	2	210402194304082028	99	回		53896930			1		1	5
627	2013-11-29	160	谷萍	1	210402193907052018	99	回		53896930			1		1	6
628	2013-10-25	161	谷萍	2	210402195006192944	1		15941399038				1		1	1
629	2013-10-25	162	谷萍	2	210402193511101725	1			58293202			1		1	7
630	2013-10-25	166	谷萍	1	210403194503023318	99	回	13898346882				1		1	2
631	2013-10-25	163	谷萍	2	210403194712273321	99	回	13898346882				1		1	18
632	2013-11-29	164	谷萍	2	210402194703081727	1			57729467			1		1	14
633	2013-10-25	168	谷萍	1	210402195602190953	1		13841319421				1		1	3
634	2013-10-25	167	谷萍	1	210402196211213016	1		13898310632				1		1	3
635	2013-10-25	121	谷萍	2	210402194905131526	1			57755566			1		1	15
636	2013-10-25	122	谷萍	2	210402194404192021	1			58344256			1		1	10
637	2013-11-29	123	谷萍	1	210402194410121510	2			57755566			1		1	12
638	2013-10-25	124	谷萍	2	150403194909290022	1		13204130262				1		1	16
639	2013-10-25	125	谷萍	2	210402194310272928	1		13898317159				1		1	8
640	2013-10-25	126	谷萍	2	210402195805052921	1			57730096			1		1	3
641	2013-10-26	127	谷萍	2	210402194605172924	1		13591531158				1		1	0
642	2013-10-26	128	谷萍	2	210402470314222	1			57729431			1		1	8
643	2013-10-26	129	谷萍	1	210402410803271	1		13898316680				1		1	20
644	2013-10-26	130	谷萍	2	210402193908192960	1			53864499			1		1	0
645	2013-10-26	131	谷萍	1	210402194710092918	1			57735141			1		1	16
646	2013-10-26	132	谷萍	2	210422195205162524	1		15898339624				1		1	12
647	2013-10-26	133	谷萍	1	210403194909222712	1		15842349870				1		1	3
648	2013-10-26	134	谷萍	1	210403194611082710	1		13364133502				1		1	3
649	2013-10-26	135	谷萍	2	210403196102092741	1		15841375837				1		1	1
650	2013-10-26	136	谷萍	1	210404193511020012	1		15841396105				1		1	2
651	2013-10-26	137	谷萍	2	21040219391220416X	1			58292906			1		1	5
652	2013-10-26	138	谷萍	2	210402194706192940	1			58870710			1		1	6
653	2013-11-25	139	谷萍	1	210404196407161812	1		13019651210				1		1	8
654	2013-10-26	140	谷萍	1	210403197306260916	1		13050159989				1		1	5
655	2013-10-26	141	谷萍	1	21040219310107295X	1			57735681			1		1	7
656	2013-10-26	142	谷萍	1	210402193910162939	1		13082275185				1		1	4
657	2013-10-26	143	谷萍	1	210402194601140511	1			57727634			1		1	2
658	2013-10-26	144	谷萍	2	210402194110053560	1			58128028			1		1	9
659	2013-10-26	145	谷萍	2	210402195807142947	1			57706141			1		1	4
660	2013-10-26	141	杨艺多	2	210411196209262966	1		13009263336				1		1	7
661	2013-10-28	166	谷萍	1	210402194302243510	99	回		57721167			1		1	6
662	2013-10-28	165	谷萍	1	210402195701102971	1		13898314349				1		1	4
663	2013-10-28	164	谷萍	2	210402194908232947	99	回		57732000			1		1	14
664	2013-10-28	163	谷萍	2	210402195004042942	1			53890970			1		1	10
665	2013-10-28	162	谷萍	2	210402194303071722	1			52907185			1		1	16
666	2013-10-28	161	谷萍	1	210403194507203316	1			58126526			1		1	17
667	2013-10-28	160	谷萍	2	210402195201114124	1			57733105			1		1	2
668	2013-10-28	159	谷萍	1	210402194609072912	1		13841377538				1		1	1
669	2013-10-28	158	谷萍	2	210402195304010520	1			57724060			1		1	6
670	2013-11-29	157	谷萍	2	210402193601233561	99	回		57720937			1		1	5
671	2013-10-28	156	谷萍	2	210402194008034144	1			58191296			1		1	12
672	2013-11-29	155	谷萍	1	210402195612142939	2		13898302919				1		1	15
673	2013-10-28	154	谷萍	2	210402194105103527	1			57732483			1		1	8
674	2013-10-28	153	谷萍	1	21040219390528291X	1			57727543			1		1	2
675	2013-10-28	152	谷萍	2	210404195004300342	1		15040805984				1		1	14
676	2013-10-28	151	谷萍	2	21040219640305294X	1		13470588242				1		1	4
677	2013-10-28	150	谷萍	1	210403194607011530	1			57720179			1		1	1
678	2013-10-28	149	谷萍	2	210421195409191240	1		13050141458				1		1	23
679	2013-10-28	148	谷萍	2	210404194602253625	1		13841346364				1		1	5
680	2013-11-29	147	谷萍	1	21040219690609413X	1		13898348227				1		1	6
681	2013-10-28	121	谷萍	2	210402195102040027	1		15040838392				1		1	4
682	2013-10-28	122	谷萍	2	210402194302082921	1		15242363734				1		1	15
683	2013-10-28	123	谷萍	2	210404194210110027	1		13332129696				1		1	3
684	2015-10-28	28	蒋岑	2	210402460506294	1						1		1	18
685	2013-10-28	124	谷萍	2	210402195308033543	1		15841380795				1		1	20
686	2013-10-28	125	谷萍	2	210402194802114141	1		13358794437				1		1	10
687	2013-10-28	126	谷萍	1	210402195302192930	1		13188263529				1		1	5
688	2013-10-28	127	谷萍	1	210404194011030614	1			58119883			1		1	7
689	2013-10-28	128	谷萍	2	210402194908052743	1		13842354684				1		1	20
690	2013-10-28	129	谷萍	2	210402193806292928	1			57716168			1		1	15
691	2013-10-29	130	谷萍	2	210402194206152926	1			57728363			1		1	10
692	2013-10-29	131	谷萍	1	210402194204262910	99	锡伯		57728363			1		1	5
693	2013-10-29	132	谷萍	2	210402193211072969	99	朝鲜	13841312751				1		1	5
694	2013-10-29	134	谷萍	1	21040219450201021X	1			52602422			1		1	12
695	2013-10-29	135	谷萍	2	210411195405182029	1			58126660			1		1	5
698	2013-10-29	136	谷萍	2	210402194306272925	1			58126938			1		1	12
699	2013-10-29	137	谷萍	2	210402194601232926	1			58291845			1		1	12
700	2013-10-29	142	谷萍	2	210402194507042923	1			58129115			1		1	2
701	2013-10-29	140	谷萍	1	210402195512130930	1		13591559091				1		1	15
702	2013-10-29	139	谷萍	2	210402193504294127	1		15724681439				1		1	1
703	2013-10-29	138	谷萍	2	210402195308192923	1		15941384268				1		1	3
704	2013-10-29	141	谷萍	2	210402195012032920	1		15724693541				1		1	5
705	2013-10-29	143	谷萍	2	210403196208180029	1		13470550767				1		1	10
706	2013-10-29	156	谷萍	1	210402196204222918	1			57720946			1		1	2
707	2013-10-29	155	谷萍	2	210402194609182927	1			57726344			1		1	22
708	2013-10-29	154	谷萍	2	210402195109122420	1		13942346932				1		1	4
709	2013-10-29	153	谷萍	2	210403331226212	1		13841364308				1		1	30
710	2013-10-29	152	谷萍	2	210403195308302121	1		15694139453				1		1	13
711	2013-10-29	151	谷萍	1	210404194305180319	1			57726717			1		1	15
712	2013-10-29	157	谷萍	2	210404194412030324	1		18741371892				1		1	13
713	2013-10-29	158	谷萍	2	210402195511112941	1		15041305468				1		1	13
714	2013-10-29	150	谷萍	1	21040319550905091X	1			57729989			1		1	5
715	2013-10-29	149	谷萍	1	21040319691214331X	1			57117947			1		1	6
716	2013-10-30	148	谷萍	2	150403195308270020	1			58306350			1		1	5
717	2013-10-30	147	谷萍	2	211202195703210060	1		13841368157				1		1	5
718	2013-10-30	146	谷萍	1	210402194501283515	1		15898344676				1		1	13
719	2013-10-30	145	谷萍	1	210402195610012954	1			58218991			1		1	14
720	2013-10-30	144	谷萍	2	210402196409212924	1			57708203			1		1	6
721	2013-10-30	159	谷萍	2	210402193704063542	1		15141353590				1		1	5
722	2013-10-30	165	谷萍	1	210402194909022431	1		13842386021				1		1	2
723	2013-10-30	164	谷萍	2	210402197410252928	1		15724693541				1		1	3
724	2013-10-30	160	谷萍	1	210402195310231514	1			53890715			1		1	5
725	2013-10-31	161	谷萍	2	210403194908222729	1		15841398920				1		1	10
726	2013-10-31	162	谷萍	1	21040219360522411X	1		13941386898				1		1	4
727	2013-10-31	167	谷萍	2	210402194804242921	1			57734510			1		1	3
728	2013-10-31	168	谷萍	2	210404194812063328	1			58293809			1		1	3
729	2013-10-31	166	谷萍	2	210402193807122920	1			57720421			1		1	8
730	2013-10-31	169	谷萍	2	210402371112354	1		13841384460				1		1	18
731	2013-10-31	170	谷萍	1	210402195411202931	1		15040824389				1		1	1
732	2013-10-31	129	谷萍	1	210403194908140934	1			53864385			1		1	4
733	2013-10-31	128	谷萍	2	210403194706080929	1			53864385			1		1	3
734	2013-10-31	127	谷萍	1	21042119531205141X	1		13352131933				1		1	8
735	2013-10-31	125	谷萍	2	210402195807242948	1			57712049			1		1	3
736	2013-10-31	126	谷萍	2	210402195312150224	1			52908397			1		1	18
737	2013-10-31	124	谷萍	2	210402193612212926	1			57119323			1		1	12
738	2013-10-31	123	谷萍	2	210404521003212	1			53865278			1		1	14
739	2013-10-31	122	谷萍	1	210402195710052216	1			58119268			1		1	4
740	2013-10-31	121	谷萍	2	210402195004102941	1		13504135051				1		1	6
741	2013-10-31	139	谷萍	2	210402194108132921	1			57190321			1		1	12
742	2013-10-31	138	谷萍	1	210402194409262914	1		13841302042				1		1	5
743	2013-10-31	137	谷萍	2	210402194503202926	1		13841302042				1		1	10
744	2013-10-31	136	谷萍	2	21040219380505352X	1			57713377			1		1	3
745	2013-10-31	135	谷萍	2	210402194403194148	1			57710673			1		1	20
746	2013-10-31	134	谷萍	1	210402193803224137	1			57710673			1		1	1
747	2013-10-31	133	谷萍	1	210402196905052915	1		15604136361				1		1	10
748	2013-11-01	132	谷萍	1	210402196510222916	1		13904136230				1		1	1
749	2013-11-01	131	谷萍	2	210403196604240628	1			57722998			1		1	2
750	2013-11-01	130	谷萍	2	210402196205272925	1		15141357976				1		1	4
751	2013-11-01	140	谷萍	2	210402195306092961	1			58855893			1		1	2
752	2013-11-29	141	谷萍	2	210402610317294	99	锡伯	13042641917				1		1	3
753	2015-10-28	7	蒋岑	2	210402195407062227	1						1		1	3
754	2013-11-01	142	谷萍	2	210402195410112969	1		15040841786				1		1	4
755	2013-11-01	143	谷萍	2	210403195606111526	1		15042392526				1		1	9
756	2013-11-01	144	谷萍	2	210402600311294	1		15042389923				1		1	8
757	2013-11-01	145	谷萍	1	210402193512242976	1			57728176			1		1	3
758	2013-11-01	158	谷萍	2	210402195206104144	1		15898328224				1		1	2
759	2013-11-01	159	谷萍	2	210402195711081721	1			53865787			1		1	7
760	2013-11-01	160	谷萍	1	210402196411022919	1		13842384438				1		1	5
761	2013-11-01	161	谷萍	2	210404196005311822	2		18241341624				1		1	3
762	2013-11-01	162	谷萍	2	210403194007053323	1			58126583			1		1	1
763	2013-11-01	163	谷萍	2	210411194907160466	1		13050109936				1		1	2
764	2013-11-01	164	谷萍	2	210402194508034124	1			57718828			1		1	2
765	2013-11-01	165	谷萍	2	210421194907042825	1			58129522			1		1	12
766	2013-11-01	166	谷萍	1	210402196804254112	1		13842309782				1		1	3
767	2013-11-01	167	谷萍	1	210404194407221812	1			57800892			1		1	13
768	2013-11-01	146	谷萍	2	210402195301171724	1		13050164259				1		1	12
769	2013-11-01	147	谷萍	2	210402196304212426	1		15941379863				1		1	13
770	2013-11-01	148	谷萍	1	210403194301150618	1			58290958			1		1	13
771	2013-11-01	149	谷萍	2	210402510807294	1		13322129682				1		1	10
772	2013-11-01	150	谷萍	1	21040219671006051X	1		15714135887				1		1	4
773	2013-11-01	151	谷萍	2	210402195411052961	1		13125502208				1		1	0
774	2013-11-01	152	谷萍	2	21040219470924294X	1		15241335116				1		1	8
775	2013-11-01	153	谷萍	1	21040219510904299X	1			58117110			1		1	12
776	2013-11-01	154	谷萍	1	210402195802094114	1		13238131589				1		1	9
777	2013-11-01	155	谷萍	1	210402195112262934	1		13904131941	57722421			1		1	14
778	2013-11-01	156	谷萍	1	210402193606112910	1			57728549			1		1	13
779	2013-11-01	157	谷萍	1	210402196902072910	1		13470545543				1		1	13
780	2015-11-02	35	蒋岑	1	210402680121295	1						1		1	10
781	2013-11-01	121	谷萍	2	210402520205412	1		13841323070				1		1	1
782	2013-11-04	122	谷萍	1	210403195112013336	1		13188294688	57725462			1		1	1
783	2013-11-04	123	谷萍	2	210403195211173343	1			57725462			1		1	2
784	2013-11-04	124	谷萍	2	210402195111012722	1			58176257			1		1	2
785	2013-11-04	125	谷萍	2	21040219441007294X	1			58199639			1		1	4
786	2013-11-04	126	谷萍	1	210402550409153	1		13188254918	58865168			1		1	4
787	2013-11-04	127	谷萍	1	210402195106252211	1			57734138			1		1	10
788	2013-11-04	128	谷萍	1	210402194803113538	1			57727127			1		1	4
789	2013-11-04	129	谷萍	1	210402194305221712	1		18642361801				1		1	1
790	2013-11-04	130	谷萍	2	210402195006302920	1			57714982			1		1	13
791	2013-11-04	131	谷萍	2	210402194905102944	1		13841397770				1		1	5
792	2013-11-04	133	谷萍	1	210402195011270919	1			58711611			1		1	16
793	2013-11-04	134	谷萍	2	210402195112190942	1			58711611			1		1	12
794	2013-11-04	135	谷萍	2	210402193808270220	1			58127919			1		1	3
795	2013-11-04	136	谷萍	2	210402195601063004	1			58117386			1		1	10
796	2013-11-04	137	谷萍	1	210402195602062951	1			58128209			1		1	6
797	2013-11-04	138	谷萍	2	210402195512192226	1			57738385			1		1	2
798	2013-11-04	139	谷萍	1	21042119490427003X	1			57807148			1		1	4
799	2013-11-04	140	谷萍	2	210402194501292948	1			53896087			1		1	6
800	2013-11-04	141	谷萍	1	21040219260809351X	1			53891638			1		1	11
801	2013-11-04	143	谷萍	2	210402195505180921	1		15242381584				1		1	4
802	2013-11-04	144	谷萍	2	210403194901210020	1		13188260569				1		1	17
803	2013-11-04	142	谷萍	2	21040319610701032X	1		15842317949				1		1	16
804	2013-11-04	154	谷萍	1	210404193909172411	1			57190925			1		1	7
805	2013-11-04	155	谷萍	2	210404194305030329	1			56636590			1		1	2
806	2013-11-04	156	谷萍	2	210402530315292	1		13234139500				1		1	22
807	2013-11-04	157	谷萍	1	21041119630728021X	1		15040840638				1		1	0
808	2013-11-04	158	谷萍	2	210402196112242946	1		18641338613				1		1	7
809	2013-11-04	159	谷萍	2	210403195202232129	1			58128204			1		1	19
810	2013-11-04	160	谷萍	2	210402195011040021	1			57106450			1		1	1
811	2013-11-04	146	谷萍	2	21040219341018092X	1			57807513			1		1	13
812	2015-10-27	4	蒋岑	2	210402194004010241	1						1		1	4
813	2013-11-04	147	谷萍	2	210411194006203545	1		13841355315				1		1	18
814	2013-11-04	148	谷萍	2	210404194407210021	1			57714960			1		1	16
815	2013-11-04	149	谷萍	2	210402193101170947	1			58293076			1		1	17
816	2013-11-04	150	谷萍	1	210402193611160212	1			57728864			1		1	4
817	2013-11-04	151	谷萍	2	21040219561022296X	1		18741322636	53891228			1		1	10
818	2013-11-04	152	谷萍	2	210402197107052923	2		13841390709				1		1	5
819	2013-11-04	153	谷萍	2	210402194905092926	1		15304235952				1		1	22
820	2013-11-04	161	谷萍	2	210403195903171525	1			58218335			1		1	7
821	2013-11-05	162	谷萍	2	210402195510282228	1			57978865			1		1	5
822	2013-11-05	163	谷萍	2	210403194912122122	1		13941316074				1		1	11
823	2013-11-05	164	谷萍	1	21040219591025201X	1						1		1	10
824	2013-11-05	165	谷萍	2	210404193210213320	1			57721722			1		1	1
825	2013-11-05	166	谷萍	1	210404196310223634	1		15842333719				1		1	2
826	2013-11-05	121	谷萍	2	210402194207312928	1		15841355935				1		1	10
827	2013-11-05	122	谷萍	1	210411193602131416	2			57707403			1		1	1
828	2013-11-05	123	谷萍	2	210402195312280985	1		13841319530				1		1	8
829	2013-11-05	124	谷萍	1	210402195510042953	1		15841348834				1		1	0
830	2013-11-05	125	谷萍	2	210402194809282965	1			58290158			1		1	24
831	2013-11-05	126	谷萍	2	210402195610022482	1			58297549			1		1	9
832	2015-10-28	6	蒋岑	2	210402196009203025	1								1	15
833	2013-11-05	127	谷萍	2	210402194006222942	1			58589673			1		1	12
834	2013-11-26	128	谷萍	2	210402195611042725	1		13104232308				1		1	10
835	2013-11-05	129	谷萍	2	210402196202103560	1		15941345592				1		1	12
836	2013-11-05	130	谷萍	1	210421194306261619	1		13941378072				1		1	3
837	2013-11-05	131	谷萍	2	370625195803291224	1		15040800257				1		1	11
838	2013-11-05	132	谷萍	1	210403195207074510	1		13704933582				1		1	25
840	2013-11-05	133	谷萍	2	210403195402080940	1		15042360364				1		1	6
841	2013-11-05	134	谷萍	1	210402195201114175	1		13804131810				1		1	2
842	2013-11-29	135	谷萍	1	210402193910172918	2		13841313510				1		1	12
843	2013-11-05	136	谷萍	2	210402195206052727	1			58191396			1		1	8
844	2013-11-05	137	谷萍	2	210402194902114122	1		13942329679	58126183			1		1	6
845	2013-11-05	138	谷萍	1	210402195201011731	1		15941386382				1		1	4
846	2013-11-05	139	谷萍	2	210402194102142029	1			57716695			1		1	2
847	2013-11-05	140	谷萍	2	210404194901220022	1			57716655			1		1	10
848	2013-11-05	141	谷萍	2	210402195704262946	1		13050110442	57708843			1		1	12
849	2013-11-05	142	谷萍	2	210404194109210322	1			53896725			1		1	9
850	2013-11-05	143	谷萍	2	210404195012191246	1			57718733			1		1	13
851	2013-11-06	144	谷萍	1	21040219290620293X	1			58128195			1		1	5
852	2013-11-06	145	谷萍	1	210402194501202711	2		15641300413				1		1	4
853	2013-11-12	131	谷萍	2	210402193705150920	1			57738036			1		1	40
854	2013-11-12	132	谷萍	1	210402196403152932	1			57173219			1		1	1
855	2013-11-12	133	谷萍	2	210402195106280220	1		13500435450				1		1	2
856	2013-11-12	134	谷萍	1	21040419620205241X	1		13624134082				1		1	10
857	2013-11-12	135	谷萍	1	210403196004141810	1		13104239933				1		1	0
858	2013-11-12	136	谷萍	2	210411195512122988	1		13342138348				1		1	2
859	2013-11-12	137	谷萍	2	210402196101141525	1		13624238392				1		1	1
860	2013-11-12	138	谷萍	2	210403194204161825	1			57718171			1		1	6
861	2013-11-12	139	谷萍	2	210402193812272923	1		13130364470	57700990			1		1	21
862	2013-11-12	140	谷萍	2	210402194705042924	1			58249384			1		1	10
863	2013-11-12	121	谷萍	1	210402195612092716	1		13842346266				1		1	1
864	2013-11-12	122	谷萍	2	210404195311172125	1		13942323194	53866306			1		1	0
865	2013-11-12	123	谷萍	2	210402196702262920	1			53864750			1		1	10
866	2013-11-12	124	谷萍	1	210402194504030935	1			57713248			1		1	16
867	2013-11-12	125	谷萍	1	21040419430315001X	1		13842391503				1		1	14
868	2013-11-12	126	谷萍	2	210402195412150029	1			57705453			1		1	3
869	2013-11-12	127	谷萍	2	210404500126062	1		13104139002				1		1	11
870	2013-11-12	128	谷萍	2	210402195305022929	1		15941369262				1		1	12
871	2013-11-12	129	谷萍	1	210402195203062911	1		18604133912				1		1	10
872	2013-11-12	130	谷萍	1	210402195110012413	1		13898349426				1		1	5
873	2013-11-12	141	谷萍	2	210402195704160528	1		13591538424				1		1	18
874	2013-11-12	142	谷萍	2	21040419421229064X	1			57728886			1		1	8
875	2013-11-12	143	谷萍	2	210402196008273582	1		15242399668				1		1	1
876	2013-11-12	144	谷萍	1	210403195412140919	1		13942368658	57191660			1		1	15
877	2013-11-12	145	谷萍	2	21040219491015292X	1		13324131993				1		1	6
878	2013-11-12	146	谷萍	2	210402193903012924	1			57705244			1		1	8
879	2013-11-12	147	谷萍	2	210403196001283928	1			57729208			1		1	12
880	2013-11-12	148	谷萍	1	210402196305162918	1		13941355285				1		1	5
881	2013-11-12	149	谷萍	1	210421194908281019	1		15841380562				1		1	2
882	2013-11-12	150	谷萍	2	21040319541215064X	1		13941340167				1		1	0
883	2013-11-12	151	谷萍	1	210403195502081836	1		13941340411				1		1	7
884	2013-11-12	152	谷萍	2	210402194701142944	1		15842368246				1		1	4
885	2013-11-12	153	谷萍	2	210403194507152141	1			57705381			1		1	8
886	2013-11-12	154	谷萍	2	210402195611233580	1			57199882			1		1	3
887	2013-11-12	155	谷萍	1	210402195205062915	1		13009252949				1		1	3
888	2013-11-12	156	谷萍	2	210402196207122947	1			58833941			1		1	17
889	2013-11-12	157	谷萍	2	210402195611244124	1		15698931400				1		1	2
890	2013-11-12	158	谷萍	2	21041119540720042X	1		15040816682				1		1	4
891	2013-11-12	159	谷萍	2	21040219470426412X	1		15724694108				1		1	9
892	2013-11-12	160	谷萍	1	210403195511173353	1		15641343214				1		1	11
893	2013-11-12	161	谷萍	2	210402195101132966	1			57713376			1		1	7
894	2013-11-12	162	谷萍	2	210402195610093547	1		15042355700				1		1	8
895	2015-10-28	5	蒋岑	2	210726195711010082	1						1		1	1
896	2013-11-12	163	谷萍	2	210722195806122049	1		13042644499				1		1	10
897	2013-11-12	164	谷萍	1	21040219471207051X	1		13154137586				1		1	3
898	2013-11-26	155	杨艺多	2	210402440905152	1		15694237195				1		1	3
899	2013-11-12	166	谷萍	2	210402195805302943	1			58129191			1		1	20
900	2013-11-12	167	谷萍	2	210402195311022941	1		15898397292				1		1	5
901	2013-11-08	1	尹玉峰	2	210402196411302427	1		15698941656				1		1	4
902	2013-11-08	2	尹玉峰	1	210402195312042952	1		15898397292				1		1	3
903	2015-10-28	3	蒋岑	2	210402194705272922	1						1		1	1
904	2013-11-08	3	尹玉峰	1	210402194808263535	1		18741321038				1		1	7
905	2013-11-08	4	尹玉峰	2	210402196606072924	1		13941370584				1		1	0
906	2013-11-08	5	尹玉峰	1	210411194610070814	1		18741317067				1		1	6
907	2013-11-08	6	尹玉峰	2	210402196908144145	1		18641339987				1		1	5
908	2013-11-08	7	尹玉峰	2	210402196908144146	1		18641339987				1		1	3
909	2013-11-08	8	尹玉峰	1	210402195703104196	1		18642359578				1		1	10
910	2013-11-08	9	尹玉峰	1	210402195112024151	1			57729487			1		1	0
911	2013-11-09	10	尹玉峰	2	210402195104032928	1		15641389433				1		1	11
912	2013-11-09	11	尹玉峰	1	210404195404013318	1		13898310129				1		1	3
913	2013-11-09	12	尹玉峰	2	210404194010190640	1			52908293			1		1	13
914	2013-11-09	13	尹玉峰	1	210402194909052913	1			52907984			1		1	4
915	2013-11-09	14	尹玉峰	2	210402195301084145	1		13804135315	58306696			1		1	15
916	2013-11-09	15	尹玉峰	1	210402194711300934	1		13898315758						1	2
917	2013-11-09	16	尹玉峰	2	21040219441103294X	1			57701060			1		1	4
918	2013-11-09	17	尹玉峰	2	210402194302032940	1			58129623			1		1	10
919	2013-11-09	18	尹玉峰	2	21040219441005272X		锡伯	13941351005				1		1	10
920	2013-11-09	19	尹玉峰	2	210404195510040627	1		13591579012				1		1	6
921	2013-11-11	1	尹玉峰	1	210402195308020515	1		15694137632				1		1	3
922	2015-10-28	2	蒋岑	1	210402197605053515	1						1		1	6
923	2013-11-11	2	尹玉峰	2	210404195306063629	1		15694130087	52537996			1		1	10
924	2013-11-11	3	尹玉峰	1	210404195306103619	1		15694130087	52537996			1		1	7
925	2013-11-11	4	尹玉峰	2	210403195507221842	1			58119870			1		1	4
926	2013-11-11	5	尹玉峰	1	210402193601103513			15724697179				1		1	18
927	2013-11-11	6	尹玉峰	1	210402195701272911	1			57730096			1		1	7
928	2015-10-30	29	蒋岑	1	210402197612240538	1		13804138003				1		1	2
929	2013-11-11	7	尹玉峰	2	210402195508082921	1			57390047			1		1	3
930	2013-11-11	8	尹玉峰	2	210402195604082921	1		13841319700				1		1	2
931	2013-11-11	9	尹玉峰	2	210404195101123026	1			57730317			1		1	8
932	2013-11-11	10	尹玉峰	2	210402193608090540	1			52907616			1		1	1
933	2013-11-11	11	尹玉峰	1	210402194709120010	1			58199895			1		1	3
934	2013-11-11	12	尹玉峰	2	210402195410112985	2		13050132758	57705780			1		1	3
935	2013-11-11	13	尹玉峰	2	210402193106102927	1			57727292			1		1	9
936	2013-04-18	14	尹玉峰	2	210402195011120224	1		18742356801				1		1	4
937	2013-11-11	15	尹玉峰	1	21040219500301291X	1		18642380033				1		1	20
938	2013-11-11	16	尹玉峰	2	210402194401120524	1			58705678			1		1	18
939	2013-11-11	17	尹玉峰	1	210402196211190539	1		13898339106				1		1	17
940	2013-11-11	18	尹玉峰	1	210402194901230519	1		13019660718				1		1	2
941	2013-11-11	1	尹玉峰	2	210402195006242980	1		13941330570				1		1	6
942	2013-11-11	2	尹玉峰	1	210402196412302939	1		13942344896				1		1	14
943	2013-11-11	3	尹玉峰	1	210402196504122919	1		13841338660				1		1	8
944	2013-11-11	4	尹玉峰	2	210403194507123324	1		13504236184				1		1	18
945	2013-11-29	5	尹玉峰	2	210403196511240020	2		15941399151				1		1	10
946	2013-11-04	6	尹玉峰	2	210421193703031820	1		13029268001				1		1	20
947	2013-11-04	7	尹玉峰	1	210403196007230931	1		15694236882				1		1	8
948	2013-11-04	8	尹玉峰	1	210402196111252915	1		15604935126				1		1	2
949	2013-11-04	1	尹玉峰	1	210402196105220538	1		15694138858				1		1	1
950	2013-11-04	2	尹玉峰	1	210411194912130819	1			57112338			1		1	12
951	2013-11-04	3	尹玉峰	1	210402195705272935	1		18641381018	57713663			1		1	10
952	2013-11-04	4	尹玉峰	2	210402194609022923	1			57707450			1		1	8
953	2013-11-04	5	尹玉峰	2	210402481112298	1			58218167			1		1	9
954	2013-11-21	6	尹玉峰	1	210402195211012930	2			57724425			1		1	5
955	2013-11-21	7	尹玉峰	1	210421195204293032	2		13941355418				1		1	6
956	2015-10-27	1	蒋岑	1	230205193912120013	1						1		1	26
957	2015-10-30	40	蒋岑	2	210402192901282926	1						1		1	12
958	2013-11-04	8	尹玉峰	2	210404195310142442	1			58167502			1		1	27
959	2013-11-21	9	尹玉峰	1	210411195206170017	2		13042645325				1		1	3
960	2013-11-04	10	尹玉峰	1	210402194410122919	1		13941328541				1		1	1
961	2013-11-04	1	尹玉峰	2	210402195702251549	1		15898322279				1		1	15
962	2013-11-04	2	尹玉峰	2	210402194710193540	1		13372841120				1		1	2
963	2013-04-24	3	尹玉峰	1	210402194108041712	1		13394227527				1		1	10
964	2013-11-21	4	尹玉峰	1	210402195202250953	2			57728566			1		1	0
965	2013-04-24	4	尹玉峰	1	210403195408273030	1		13941341954				1		1	6
966	2013-11-04	5	尹玉峰	2	210402196508091523	1		13314139378				1		1	10
967	2013-11-04	6	尹玉峰	1	210402194510122932	1			53890380			1		1	15
968	2013-04-24	7	尹玉峰	1	210402195510192919	1			58766956			1		1	15
969	2013-11-21	8	尹玉峰	1	210402192102234119	1		13904232671				1		1	30
970	2013-11-21	9	尹玉峰	1	210402196008280950	99	回	15041382700				1		1	20
971	2013-04-25	11	尹玉峰	1	210402194910313519	1		13700133991	57704742			1		1	18
972	2013-04-25	10	尹玉峰	2	210402195010243521	1		13700133991	57704742			1		1	0
973	2013-11-04	11	尹玉峰	1	210403194211303318	1			58191053			1		1	15
975	2013-11-04	12	尹玉峰	2	210402195608121529	1			57191237			1		1	10
977	2013-11-04	13	尹玉峰	2	21040219500912412X	1		18741325254	57707560			1		1	5
978	2013-11-04	14	尹玉峰	2	210402196308142744	1		15242340171				1		1	4
979	2015-11-02	41	蒋岑	2	210402194311074149	1						1		1	5
980	2013-04-25	15	尹玉峰	2	21040219531002294X	1		13941311878				1		1	14
981	2013-11-08	140	杨艺多	2	510721195506169608	1		18642354939				1		1	0
982	2013-11-08	141	杨艺多	2	210404196409040344	1		18641306627				1		1	2
984	2013-11-08	143	杨艺多	1	210402194711142913	1			58117535			1		1	4
985	2013-11-08	144	杨艺多	2	210402195802261728	1		13804134333				1		1	8
986	2013-11-08	145	杨艺多	2	210402196205262022	1			57706017			1		1	10
987	2013-11-26	146	杨艺多	1	210404195204261237	1		15134128912				1		1	10
988	2013-11-08	147	杨艺多	2	210404195605150343	1		13342124946				1		1	10
989	2013-11-08	148	杨艺多	2	210411195302082949	1		15042378611				1		1	4
990	2013-11-08	149	杨艺多	2	210402195306202948	1			57722540			1		1	4
991	2013-11-08	150	杨艺多	2	210402195112234167	1			57705673			1		1	1
992	2013-11-08	154	杨艺多	2	210411195001200024	1		13504231325				1		1	5
993	2013-11-11	151	杨艺多	2	210404196209163649	1		13841331719				1		1	14
994	2013-11-11	155	杨艺多	1	21040219461111291X	1		15841311627				1		1	8
995	2013-11-11	153	杨艺多	2	210403196302234265	1		13082273690				1		1	13
996	2013-11-11	156	杨艺多	1	210402196310202910	1		15841389091				1		1	4
997	2013-11-11	157	杨艺多	2	210402196403151729	1		15641361338				1		1	6
998	2013-11-05	152	杨艺多	1	210402195205012934	1			53892269			1		1	6
999	2013-11-26	152	杨艺多	2	210403197012021821	1		13188252538				1		1	7
1000	2013-11-11	158	杨艺多	2	210402197705012921	1		13304136486				1		1	3
1001	2013-11-11	159	杨艺多	1	520202195406022815	1		13304136486				1		1	3
1002	2013-11-11	125	杨艺多	1	21040219530509245x	1			58191398			1		2	0
1003	2013-11-11	126	杨艺多	2	210404195209210324	1		13470578290				1		1	15
1004	2013-11-11	170	杨艺多	2	210423194512010426	1		15242708302		顺城区新城路西段6-4号楼3单元202		1		1	2
1005	2013-11-11	160	杨艺多	2	21040319520802032X	1			57705453			1		1	3
1006	2013-11-11	161	杨艺多	1	210402195509192911	1			57801132			1		1	1
1007	2013-11-11	122	杨艺多	2	210403194602050020	1			58290178			1		1	16
1008	2015-10-28	17	蒋岑	1	210402194909302935	1						1		1	2
1009	2013-11-11	121	杨艺多	2	21040219510320242x	1			57190040			1		1	10
1010	2013-11-11	123	杨艺多	2	210402195609022960	1			57721004			1		1	8
1011	2013-11-11	162	杨艺多	1	210402195709032912	1			57708739			1		1	2
1012	2013-11-11	163	杨艺多	2	210402194401012929	1			58119316			1		1	10
1013	2013-11-11	164	杨艺多	1	210402195810190974	1		15898328024				1		1	1
1014	2013-11-11	165	杨艺多	2	210402193611061521	1			57703712			1		1	5
1015	2013-11-11	166	杨艺多	1	210402195809233535	1		13941320511				1		2	0
1016	2013-11-11	124	杨艺多	1	21040219471122293x	1			57705715			1		1	1
1017	2013-11-26	167	杨艺多	1	210402196310052959	1			57706533			1		1	10
1018	2013-11-21	168	杨艺多	2	210402194703020940	2			58129580			1		1	12
1019	2013-11-11	171	杨艺多	2	210402195010212928	1		13942379214	58293058			1		1	19
1020	2013-11-21	169	杨艺多	1	210402197104122914	2		13942380288				1		1	3
1021	2013-11-12	159	谷萍	1	210402195409012418	1			58199600			1		1	15
1022	2013-11-12	160	谷萍	2	210402193604012924	1			53890450			1		1	5
1023	2013-11-12	161	谷萍	2	210402195903202989	1		13941366594				1		1	2
1024	2013-11-26	162	谷萍	1	210404194506083611	1			58126866			1		1	10
1025	2013-11-12	163	谷萍	1	210402195804202932	1		13941310588				1		1	1
1026	2013-11-12	164	谷萍	1	210404195412033319	1		13842358921				1		1	1
1027	2013-11-12	165	谷萍	2	210402194511130520	1			57734326			1		1	6
1028	2013-11-26	166	谷萍	1	210402194907272939	1		13204139090	57732702			1		1	8
1029	2013-11-26	167	谷萍	1	210402194707033511	1			58307159			1		1	1
1030	2013-11-26	168	谷萍	2	210402194706283527	1			58307159			1		1	9
1031	2013-11-12	169	谷萍	2	21040219540422098X	1		15042386312				1		1	11
1032	2013-11-12	170	谷萍	2	210402195207202942	1			58987712			1		1	10
1033	2013-11-26	121	谷萍	2	210403193506183320	1			57703610			1		1	12
1034	2013-11-12	122	谷萍	1	210402194203272914	1			57732328			1		1	12
1035	2013-11-26	123	谷萍	1	210403196306032716	1		13009255501				1		1	10
1036	2013-11-12	124	谷萍	1	210403196605223918	1		13188256058				1		1	4
1037	2013-11-21	125	谷萍	1	210402195805282954	2		13514139978				1		1	5
1038	2013-11-12	126	谷萍	1	210402195302030536	1		15566436817				1		1	2
1039	2013-11-12	127	谷萍	1	210404195711132915	1		13898300965				1		1	5
1040	2013-11-12	128	谷萍	2	210402194912212922	1			58293291			1		1	1
1041	2013-11-12	127	杨艺多	1	210402196404242913	1		18642365507				1		1	12
1042	2013-11-12	128	杨艺多	1	210402197405010916	1		13842353988				1		1	2
1043	2013-11-12	129	杨艺多	2	210402194002090225	1			57648737			1		1	1
1044	2013-11-12	130	杨艺多	1	210403195402130952	1		13904130679				1		1	11
1045	2013-11-21	131	杨艺多	1	210402194906092418	2		13942321769				1		1	3
1046	2013-11-12	132	杨艺多	2	21040219500807292X	1			57721397			1		1	5
1047	2013-11-12	140	杨艺多	1	210402196708312933	1		15141323412				1		1	1
1048	2013-11-12	133	杨艺多	2	210402195607302926	1		13214133948				1		1	2
1049	2013-11-12	134	杨艺多	2	210402194309162422	1			57190933			1		1	21
1050	2013-11-12	141	杨艺多	1	210402195603062910	1		13324237249				1		1	0
1051	2013-11-12	135	杨艺多	2	210402195604182922	1			53893504			1		1	4
1052	2013-11-12	142	杨艺多	1	210402196502162415	1		13904138456				1		1	4
1053	2013-11-12	136	杨艺多	2	210402193703232922	1		58117696	58306827			1		1	21
1054	2013-11-12	143	杨艺多	1	210402195412144155	1		15504930584				1		1	3
1055	2013-11-12	144	杨艺多	1	210403195403183319	1		13358790201				1		1	15
1056	2013-11-12	137	杨艺多	2	210421194507030622	1		13654233883				1		1	16
1057	2013-11-12	138	杨艺多	2	210402194807193520	1		13654233883				1		1	6
1058	2013-11-12	145	杨艺多	1	21040219630213417X	1		13942336484				1		1	6
1059	2013-11-12	139	杨艺多	2	210402195812082045	1		13804136738				1		1	13
1061	2013-11-12	146	谷萍	1	210402194810262910	1		13841388236				1		1	1
1062	2013-11-12	147	谷萍	2	210402196310243560	1		13804236916				1		1	3
1063	2013-11-12	148	谷萍	2	210404194811022428	1		13898345494				1		1	1
1064	2013-11-13	149	谷萍	1	210402195104081519	1		13304138831				1		1	28
1065	2015-11-02	44	蒋岑	1	210402196909162935	1						1		1	4
1066	2013-11-13	150	谷萍	1	210402193911012916	1			57700809			1		1	2
1067	2013-11-13	151	谷萍	1	21040219600208297X	1		15898384888				1		1	6
1068	2013-11-13	152	谷萍	1	21040219510721353X	1			57715178			1		1	8
1069	2013-11-13	153	谷萍	2	210402194509073563	1		13898305002				1		1	3
1070	2013-11-14	154	谷萍	2	21040219290619292X	1			57724487			1		1	12
1071	2013-11-14	155	谷萍	1	21040219590330247X	1		13842392904				1		1	4
1072	2013-11-14	157	谷萍	2	21040419670704364X	1		13154134533				1		1	3
1073	2013-11-14	158	谷萍	2	210402195405022424	1						1		1	5
1074	2013-11-14	159	谷萍	2	210404196403172442	1			58766930			1		1	2
1076	2015-10-30	45	蒋岑	2	210402193911232927	1						1		1	2
1077	2013-11-14	160	谷萍	1	210403195510210319	1		15566430557				1		1	8
1078	2013-11-14	161	谷萍	2	210403195703310324	1		15566430557				1		1	0
1079	2013-11-21	162	谷萍	1	21040219520724291X	1		13898349730				1		1	14
1080	2013-11-14	163	谷萍	1	210402194408272918	1		13358695795				1		1	14
1081	2013-11-15	146	杨艺多	1	210403194504013357	1		13942397908				1		1	3
1082	2013-11-21	156	杨艺多	2	210402196003292987	1		15842387891				1		1	9
1083	2013-11-26	147	杨艺多	1	210402194602243512	1		13842368569				1		1	8
1086	2013-11-15	158	杨艺多	2	210402195403172226	1		15566430557				1		1	5
1087	2013-11-15	151	杨艺多	2	210402194907071547	1		15040814018				1		1	10
1088	2013-11-15	159	杨艺多	2	210402195101292441	1		15898313754				1		1	3
1089	2013-11-15	149	杨艺多	1	210402196402022917	1		13019653051				1		1	0
1090	2013-11-15	150	杨艺多	1	210404194111151210	1		15604933733				1		1	2
1091	2013-11-26	162	杨艺多	1	210402196208234174	1		13470590477				1		1	2
1092	2013-11-18	160	杨艺多	2	21040219470402242X	1			58297549			1		1	3
1093	2013-11-18	154	杨艺多	2	210402196312032943	1			58218725			1		1	6
1094	2013-11-18	163	杨艺多	2	210402196307281742	1			57173415			1		1	7
1095	2013-11-18	155	杨艺多	2	21040219650325416X	1		13470590477				1		1	0
1096	2013-11-18	164	杨艺多	1	210402195112180955	1		18904238810				1		1	7
1097	2013-11-18	165	杨艺多	1	210402195107202910	1			57110141			1		1	18
1098	2013-11-18	153	杨艺多	2	210402193601022422	1			58307227			1		1	20
1099	2013-11-21	152	杨艺多	1	210402193310282937	99	回		57199798			1		1	5
1100	2013-11-18	161	杨艺多	1	210402195909272910	1		13842319919				1		1	7
1101	2013-11-18	171	杨艺多	2	210402194611272948	1			57386766			1		1	1
1102	2013-11-18	166	杨艺多	1	210402194805061735	1		13942353212				1		1	7
1103	2013-11-18	172	杨艺多	2	210402194502262927	1			57190237			1		1	5
1104	2013-11-18	167	杨艺多	1	210402195808222973	1		15941368064				1		1	5
1105	2013-11-18	168	杨艺多	1	210402197002061516	1		13470556979				1		1	8
1106	2013-11-21	169	杨艺多	1	210402196312132979	1		15641355299				1		1	3
1107	2013-11-18	121	杨艺多	2	210402195901042926	1			58894729			1		1	15
1108	2013-11-18	122	杨艺多	2	210402195605193527	1			57804678			1		1	9
1109	2015-11-02	46	蒋岑	2	210402196906262965	1		13942373400				1		1	1
1110	2013-11-18	123	杨艺多	2	210403196402040927	1		13841308038				1		1	1
1111	2013-11-18	124	杨艺多	2	210402194911012929	1			57716209			1		1	6
1112	2013-11-18	125	杨艺多	2	210402195505124129	1		13604138492				1		1	14
1113	2013-11-18	126	杨艺多	2	210402195208203007	1		15842307442				1		1	5
1114	2013-11-29	173	杨艺多	2	210402194504152027	1			53896736			1		1	20
1115	2013-11-18	127	杨艺多	2	210411196206271824	1		15042399842				1		1	8
1116	2013-11-18	128	杨艺多	2	210404194204293621	1			52563293			1		1	5
1117	2013-11-18	129	杨艺多	2	210402194310123543	1			58118963			1		1	19
1118	2013-11-18	170	杨艺多	1	210402194604272915	1			58803719			1		1	12
1119	2013-11-18	130	杨艺多	1	210421195310212013	1		13042643571				1		1	12
1120	2013-11-18	131	杨艺多	2	210402195610052948	1		15641353651				1		1	3
1121	2013-11-18	164	谷萍	1	210402197008142413	1		15724696035				1		1	7
1122	2013-11-18	165	谷萍	2	210404196411223342	1			57199618			1		1	10
1123	2013-11-18	166	谷萍	2	21040419650415362X	1			56927876			1		1	10
1124	2013-11-18	167	谷萍	2	210402195504202949	1		13082276088				1		1	1
1125	2013-11-18	168	谷萍	2	210411194402090423	1			57713776			1		1	3
1126	2013-11-18	169	谷萍	1	210403195912054216	1		13841308901				1		1	3
1127	2013-11-18	170	谷萍	1	210402194502074117	1		13358693017				1		1	1
1128	2013-11-26	121	谷萍	1	210402195901131718	1			57191088			1		1	6
1129	2013-11-19	122	谷萍	1	210402194004212919	1			57199883			1		1	16
1130	2015-10-28	26	蒋岑	2	210402194403282922	1						1		1	12
1131	2013-11-19	124	谷萍	1	210402194909132913	1			57733773			1		1	30
1132	2013-11-19	125	谷萍	2	210402195102262922	1			57733773			1		1	25
1133	2013-11-19	12	尹玉峰	2	210402193908202946	1						1		1	6
1134	2013-11-19	13	尹玉峰	2	210402196303104204	1		15841325559				1		1	5
1135	2013-11-19	14	尹玉峰	1	210402194709171715	1		13081307421				1		1	1
1136	2013-11-19	15	尹玉峰	1	210404194909221214	1		13050152646				1		1	12
1137	2013-11-19	16	尹玉峰	2	210402196209022982	1		13130307400				1		1	15
1138	2013-11-29	17	尹玉峰	2	210422194805212922	2		13188276578				1		1	3
1139	2013-11-19	18	尹玉峰	2	210402195708142941	1			57720206			1		1	1
1140	2013-11-19	19	尹玉峰	2	210402193708130546	1			53893126			1		1	17
1141	2013-11-19	20	尹玉峰	2	210411194810130228	1		15042387782				1		1	6
1142	2013-11-19	21	尹玉峰	1	210411194811140217	1		15042387782				1		1	7
1143	2013-11-19	22	尹玉峰	2	210402195003194186	1			58818329			1		1	15
1144	2013-11-19	23	尹玉峰	1	210403196602171817	1		13130300055				1		1	10
1145	2015-10-28	18	蒋岑	1	210421195611080819	1						1		1	5
1146	2013-11-19	24	尹玉峰	2	210404196809271221	1		18642323062				1		1	1
1147	2013-11-19	25	尹玉峰	1	210402195611240238	1		13324232401				1		1	4
1148	2013-11-19	26	尹玉峰	2	210402196304022964	1		18604130869				1		1	1
1149	2013-11-19	27	尹玉峰	1	210402195501152931	1		15842304841				1		1	1
1150	2013-11-19	28	尹玉峰	1	210411194007060216	1		13841378919				1		1	12
1151	2013-11-19	29	尹玉峰	1	210402193305122939	1			57708290			1		1	2
1152	2013-11-19	30	尹玉峰	1	210402196209174150	1		13941355689				1		1	6
1153	2013-11-19	31	尹玉峰	1	210402196305011757	1		13324239482				1		1	2
1154	2013-11-19	32	尹玉峰	2	210402194607290027	1		18641369313				1		1	2
1155	2013-11-19	33	尹玉峰	2	210402194112192927	1		13942324996				1		1	2
1156	2013-11-21	34	尹玉峰	1	210402530201293	1		13904136400				1		1	20
1157	2013-11-21	35	尹玉峰	1	210404195612030657	1		13941390130				1		1	13
1158	2013-11-21	36	尹玉峰	2	210402620112296	2		18641387967				1		1	11
1159	2013-11-20	37	尹玉峰	2	210402193304102960	1			53891208			1		1	1
1160	2013-11-20	38	尹玉峰	1	210402193312110936	1		18741328363				1		1	2
1163	2013-11-20	1	尹玉峰	1	21040219380110051X	1			57802507			1		1	3
1164	2013-11-20	2	尹玉峰	2	210402195405042425	1		13941327717				1		1	3
1165	2013-11-20	3	尹玉峰	1	210402194810212956	1			57735870			1		1	10
1166	2013-11-20	4	尹玉峰	2	210402195009110027	1			57652200			1		1	4
1167	2013-11-20	5	尹玉峰	2	210403194410013401	1			58199396			1		1	2
1168	2013-11-20	6	尹玉峰	2	210404195211063044	1		15041359910				1		1	5
1169	2013-11-20	7	尹玉峰	1	21041119690506201X	1		13942345161				1		1	3
1170	2013-11-20	8	尹玉峰	1	210402195402061719	1		15898395782				1		1	3
1171	2013-11-20	9	尹玉峰	2	210402194612042925	1			57802507			1		1	4
1172	2013-11-20	10	尹玉峰	2	210402193202013545	1			57807533			1		1	22
1173	2013-11-20	11	尹玉峰	1	210402195511281518	1		13942338885				1		1	5
1174	2013-11-20	12	尹玉峰	1	210402195902193515	1		15641399115				1		1	3
1176	2013-11-20	13	尹玉峰	1	210402194410090558	1			57713267			1		1	5
1177	2013-11-20	14	尹玉峰	2	210402194911292721	1		15242331889				1		1	1
1178	2013-11-21	15	尹玉峰	2	210403194209102146	2		13841323939				1		1	11
1179	2013-11-20	16	尹玉峰	1	210403196802072135	1		13841323939				1		1	8
1180	2013-11-20	17	尹玉峰	2	210402193509242924	1			57803823			1		1	15
1181	2013-11-26	18	尹玉峰	2	210402195511052926	1		15641383589				1		1	4
1182	2013-11-26	19	尹玉峰	1	21040219500901051X	2			53893885			1		1	6
1183	2013-10-18	20	尹玉峰	2	210402195104300523	1			53893885			1		1	8
1184	2015-10-29	26	蒋岑	2	210402310102292	1								1	34
1185	2015-10-29	25	蒋岑	2	210402197110082963	1								1	10
1186	2013-10-18	21	尹玉峰	2	210403194505272748	1			58292289			1		1	8
1187	2013-10-18	22	尹玉峰	2	210402194711272945	1		13130310199				1		1	3
1188	2013-10-18	23	尹玉峰	1	210402195010282416	1		13470531366				1		1	18
1189	2013-10-18	24	尹玉峰	2	210411194802290424	1		15724690180				1		1	4
1190	2013-11-21	25	尹玉峰	1	210402196408294155	99	朝鲜	13591564119				1		1	8
1192	2015-11-02	24	蒋岑	2	21040219311221292x	1			53893127			1		1	3
1193	2013-10-18	26	尹玉峰	2	210402195129233526	1			58979290			1		1	14
1194	2013-11-21	27	尹玉峰	2	210402195104213526	2			57723560			1		1	16
1195	2013-10-18	28	尹玉峰	2	210402196211202026	1		13904238293				1		1	0
1196	2013-10-22	29	尹玉峰	1	210402195607122933	1		13009246658				1		1	1
1197	2013-10-18	30	尹玉峰	1	210402195901022933	1		13470591497				1		1	5
1198	2013-10-18	31	尹玉峰	1	210402195202092959	1		15842346699				1		1	3
1199	2013-10-18	32	尹玉峰	2	210403195002243325	1		15842346699				1		1	4
1200	2013-11-21	33	尹玉峰	2	210402195408081761	99	回		57190081			1		1	4
1201	2013-10-21	156	闫姣	2	210402195707222923	1		13130318255				1		1	1
1202	2015-11-02	23	蒋岑	1	210402194407071735	1			57725619			1		1	3
1203	2013-10-21	157	闫姣	2	210402194506041726	1			57725619			1		1	1
1204	2013-11-21	158	闫姣	2	210402194011192928	2			58129219			1		1	18
1205	2013-10-21	159	闫姣	1	210402196912242952	1		15842317296		15842317296		1		2	1
1206	2013-10-21	160	闫姣	2	210402195208120922	1		15898300248				1		1	2
1207	2013-10-21	161	闫姣	2	210402195707033524	1		13942350837				1		1	6
1208	2013-10-21	162	闫姣	1	210402194106020256	1			57720215			1		1	10
1209	2013-10-21	163	闫姣	1	21040219610610351X	1			57199882			1		1	6
1210	2013-10-21	164	闫姣	2	210404195106231827	1		15842300964				1		1	1
1211	2013-10-21	165	闫姣	2	210402194908142941	1			57735139			1		1	5
1212	2013-10-21	11	谷萍	2	210219195308219125	1		15841302021				1		1	10
1213	2015-11-02	22	蒋岑	2	21132119400117742x	1								1	7
1214	2013-10-21	12	谷萍	2	210402195902254146	1		14704132994				1		1	2
1215	2013-10-21	13	谷萍	1	21040319431225181X	1		13700138374				1		1	10
1216	2015-10-28	19	蒋岑	1	210402193302132912	1						1		1	1
1217	2013-10-21	14	谷萍	2	210402193402152945	1			57736576			1		1	3
1218	2013-11-21	15	谷萍	1	210402195511273577	2			57736007			1		1	7
1219	2013-10-21	16	谷萍	1	210402196412102910	1		13942376382				1		1	3
1220	2013-10-21	18	谷萍	2	210402195404291729	1		13898339435				1		1	3
1221	2013-11-21	19	杨艺多	1	210423195308021018	2			58218258			1		1	17
1223	2013-10-23	153	杨艺多	2	210402195205282942	1		13841318448				1		1	0
1224	2013-10-22	154	杨艺多	1	210402195609082939	1			58125776			1		1	16
1225	2013-11-21	155	杨艺多	2	210402195010202949	1		13941337395				1		1	2
1226	2013-10-22	1	闫姣	1	210404195306023336	1			57732708			1		1	2
1228	2013-10-22	2	闫姣	2	210403195501122165	1		15841375618				1		1	2
1229	2013-11-21	3	闫姣	1	210402194501082035				57807321			1		1	12
1230	2013-11-21	4	闫姣	2	21040219450701202X	1			57807321			1		1	4
1231	2013-10-22	5	闫姣	1	210402194701022934	1			58307769			1		1	0
1232	2013-10-22	6	闫姣	2	210402194609132022	1			57590889			1		1	4
1233	2013-10-23	7	闫姣	1	210402194602112010	1			57590889			1		1	4
1234	2013-10-22	8	闫姣	2	21040419751124062X	1		15304136643				1		1	1
1235	2013-10-22	9	杨艺多	1	210402195503233532	1		15042361282				1		1	4
1236	2013-10-22	10	闫姣	1	210402500219295	1		15941389084				1		1	1
1237	2013-11-21	11	闫姣	1	210402195709160017	2			57705796			1		1	4
1238	2013-11-21	13	闫姣	1	210421196212230810	2		15842338944				1		1	8
1239	2013-10-22	15	闫姣	2	210402550919154	1			53893724			1		1	20
1240	2013-10-22	16	闫姣	2	210403195403203324	1			57722779			1		1	6
1241	2013-10-23	145	谷萍	1	210402640424271	1		15941300122				1		1	7
1242	2013-10-23	141	谷萍	1	210402195001192937	1		13942321267				1		1	3
1243	2013-10-23	142	谷萍	1	210402194505012413	1		13130373622				1		1	7
1244	2013-10-23	143	谷萍	1	210402195612012931	1		15941342586				1		1	17
1245	2013-10-23	144	闫姣	2	210402195103094123	1		13842348392				1		1	0
1246	2015-10-27	13	蒋岑	2	210402310403092	1						1		1	20
1247	2013-10-23	134	杨艺多	1	210402196012210912	1		15541377488				1		1	14
1248	2013-10-23	136	杨艺多	1	210402193301270512	1			53890344			1		1	1
1249	2013-10-23	137	杨艺多	2	21040219660103294x	1		15242302091				1		1	9
1250	2015-11-02	19	蒋岑	2	210402193402103561	1						1		1	6
1251	2013-10-23	130	谷萍	1	210402195212230593	1			57703912			1		1	10
1252	2013-11-26	131	谷萍	1	210402195502082031	1			57703897			1		1	2
1253	2013-10-23	132	谷萍	1	210402194802103514	1		13841300845				1		2	0
1254	2013-10-23	133	谷萍	2	210402195808180523	1		18641382893				1		1	10
1255	2013-10-23	134	谷萍	2	210402194001023522	1		18741316240				1		1	13
1256	2013-10-23	135	谷萍	2	210402194708262922	1			57704523			1		1	15
1257	2013-10-23	136	谷萍	2	21041119540712042x	1		15104138325				1		1	9
1258	2015-10-29	18	蒋岑	2	210422195406030245	1		15541375008				1		1	2
1259	2013-10-23	137	谷萍	2	210404420525212	1		15724680435				1		1	11
1261	2013-10-23	121	谷萍	1	210402194409294115	1			57716696			1		1	3
1262	2013-10-23	122	谷萍	1	210402193902023533	1		13842391109				1		1	5
1263	2013-10-23	123	谷萍	2	210402195212224126	1			57722005			1		1	5
1265	2013-11-26	124	谷萍	2	210402193312112923	99	朝鲜		57702207			1		1	10
1266	2013-10-23	125	谷萍	2	210402195404272966	1			58128555			1		1	28
1267	2013-10-24	126	谷萍	1	210402196001202933	1			53893736			1		1	3
1268	2013-10-23	127	谷萍	2	210402196307242946	1		13130351501				1		1	10
1269	2013-10-23	128	谷萍	2	210402193712232967	1		13841319726				1		1	7
1270	2013-10-23	129	谷萍	2	210402195402102963	1			58199899			1		1	2
1271	2013-10-23	121	杨艺多	1	210402195501272917	1			81199899			1		1	1
1272	2013-10-23	122	杨艺多	1	210402196202162915	1		13898319368				1		1	5
1273	2013-10-23	123	杨艺多	2	210403195401150345	1			57702800			1		1	12
1274	2013-10-23	124	杨艺多	1	210403193805152719	1			57731535			1		1	5
1275	2013-10-23	125	杨艺多	1	210402196005012950	1		13030705341				1		1	20
1276	2013-11-29	126	杨艺多	1	210402196209182978	1		13841319726				1		1	7
1277	2013-10-23	127	杨艺多	1	210402195109062931	1		15141312372				1		1	24
1278	2013-10-23	128	杨艺多	1	210402195004272916	1		15841389575				1		1	2
1279	2013-10-23	129	杨艺多	1	210402195705162912	1			53866925			1		1	12
1281	2013-10-24	47	尹玉峰	2	210402194806022949	1			57728311			1		1	0
1282	2013-10-24	48	尹玉峰	1	210402196006012936	1		13082271345				1		1	2
1283	2013-11-21	49	尹玉峰	2	210422195806200223	2			57708588			1		1	1
1284	2013-10-24	50	尹玉峰	2	210402194709012941	1		13104234906				1		1	6
1285	2013-10-24	51	尹玉峰	2	210402194603273529	1		15104136386				1		1	3
1286	2013-10-24	52	尹玉峰	1	210402194608294134	1			57714855			1		1	14
1288	2013-10-24	53	尹玉峰	2	210402195311102968	1			58862731			1		1	2
1289	2013-10-24	54	尹玉峰	2	210402196401162045	1		13904139282				1		1	10
1290	2013-10-24	55	尹玉峰	2	210402621225226	1		13841314397				1		1	6
1291	2013-10-24	56	尹玉峰	2	210402195207090928	1			52908824			1		1	6
1292	2013-10-24	57	尹玉峰	2	210402194310050225	1			52713612			1		1	5
1293	2013-10-24	58	尹玉峰	2	21040319520504182X	1		13030702000				1		1	10
1294	2013-10-24	59	尹玉峰	2	210402194302282421	1			57720787			1		1	6
1295	2013-10-24	60	尹玉峰	2	210403195005141826	1		13942313544				1		1	11
1296	2013-11-21	61	尹玉峰	2	210403194505221828	1			58293093			1		1	18
1297	2013-11-21	62	尹玉峰	2	210411195708190624	2		13030712221				1		1	11
1298	2013-10-24	63	尹玉峰	2	210402195611112949	1		13020341890	58753797			1		1	2
1299	2013-10-24	64	尹玉峰	2	210402195508013520	1			57736072			1		1	2
1300	2013-10-24	65	尹玉峰	2	210402194909092026	1			53865336			1		1	16
1301	2013-10-24	144	杨艺多	1	210402195405244158	1		13591559554				1		1	2
1302	2015-10-30	48	蒋岑	1	210402193112182935	1						1		1	4
1303	2013-10-24	145	杨艺多	1	21040419560417065X	1		13050192686				1		1	7
1304	2013-10-24	146	杨艺多	1	210402193802242931	1			52907883			1		1	1
1305	2013-10-24	147	杨艺多	2	210624195701306148	1		13842381423				1		1	0
1306	2013-10-24	148	杨艺多	2	210402195403121744	1		13842329251	58125573			1		1	3
1307	2013-11-26	149	杨艺多	2	210402195511262966	1		15041388133				1		1	9
1308	2013-10-24	150	杨艺多	2	210402193206282929	1			58792855			1		1	3
1309	2013-10-24	151	杨艺多	2	210402195802282940	1			57336635			1		1	2
1310	2013-10-24	152	杨艺多	2	210402194311062420	1			57120377			1		1	4
1311	2013-10-24	153	杨艺多	1	210403193603040313	1		13030700498				1		1	3
1312	2013-10-24	154	杨艺多	1	210402196108052955	1		13941352820				1		1	5
1313	2013-10-24	155	杨艺多	2	210402195403172023	1		15241330172				1		1	6
1315	2013-10-24	41	尹玉峰	1	210402195909302956	1		13904939704				1		1	3
1316	2013-10-24	42	尹玉峰	1	210402196301132957	1			57363957			1		1	4
1317	2013-10-24	43	尹玉峰	1	210402196303312951	1		13841362906				1		1	9
1318	2013-10-24	44	尹玉峰	2	210402194409252943	1			57720371			1		1	4
1319	2013-10-24	45	尹玉峰	1	21040219640822291X	1		13504236427				1		1	13
1320	2013-10-24	46	尹玉峰	1	210402196208312953	1		13941319394				1		1	3
1321	2013-10-25	10	尹玉峰	1	21040419671107211X	1		15604234999				1		1	9
1322	2013-10-25	11	尹玉峰	2	210402194606052924	1			58191970			1		1	21
1323	2013-10-25	12	尹玉峰	2	210402194401272923	1			53866531			1		1	21
1324	2013-11-26	13	尹玉峰	1	210402194811122418	1			58117506			1		1	6
1325	2013-10-25	14	尹玉峰	2	21040219621115292X	1						1		1	2
1326	2013-10-28	15	尹玉峰	1	210402195312192918	1			57106763			1		1	7
1327	2015-10-30	49	蒋岑	1	210402196808162952	1						1		1	1
1328	2013-10-28	16	尹玉峰	2	210402194604092922	1			57727278			1		1	10
1329	2013-10-28	17	尹玉峰	2	210402195203160220	1		15714231425				1		1	0
1330	2013-10-28	18	尹玉峰	2	210411196004170822	1			55250213			1		1	0
1331	2013-11-21	161	谷萍	1	210402194402132930	2		15104131284				1		1	8
1332	2013-10-28	162	谷萍	2	210402194304013524	1		13252754062				1		1	6
1333	2013-11-21	163	谷萍	2	210402540707294	1		13125514100				1		1	6
1334	2013-10-28	164	谷萍	1	210402193702010914	1			58199617			1		1	26
1335	2013-11-26	23	尹玉峰	2	210402194107062925	1		13704136448				1		1	8
1336	2013-10-28	166	谷萍	1	210402196406133518	1		13842392149				1		1	10
1337	2013-10-28	167	谷萍	1	210402193812192915	1			58126337			1		1	27
1338	2013-10-28	168	谷萍	1	210404194203310610	1			58128099			1		1	2
1339	2013-10-28	169	谷萍	2	210402194511160228	1		15941392742				1		1	10
1340	2013-11-21	170	谷萍	1	210402194910050050	2			57725197			1		1	0
1341	2013-10-28	1	尹玉峰	1	210404195301033658	1			57720049			1		1	10
1342	2013-10-28	2	尹玉峰	2	210402196007142927	1		15134139484				1		1	5
1344	2013-10-28	3	尹玉峰	2	210402195407052942	1			58290286			1		1	13
1345	2013-10-28	4	尹玉峰	1	210404195612200652	1			57706933			1		1	8
1346	2013-10-28	5	尹玉峰	2	210402195112282927	1			57758857			1		1	4
1347	2013-10-28	6	尹玉峰	1	210411196002010219	1		13841368080				1		1	3
1348	2013-10-28	7	尹玉峰	1	210402193912141736	1		13841340591				1		1	11
1349	2013-10-28	8	尹玉峰	2	210402194709231722	1			58128470			1		1	9
1350	2013-10-28	9	尹玉峰	1	21040419461014121X	1		15242328229				1		1	14
1351	2013-10-28	1	蒋岑	2	210402195406042224	1		15898367084				1		1	5
1352	2013-10-29	2	蒋岑	1	21040219381203241x	1			57109568			1		1	16
1353	2013-10-29	3	蒋岑	2	210402194307222438	1			57109568			1		1	14
1355	2013-10-28	4	蒋岑	1	21040219361129291x	1		13130357796				1		1	4
1356	2013-10-29	5	蒋岑	2	210402195705162920	1		15241309942	57100327			1		1	2
1357	2013-10-28	6	蒋岑	2	210402193509032943	1			57730722			1		1	6
1358	2013-10-28	7	蒋岑	1	210402194810111514	1		15724684568				1		1	12
1359	2013-11-21	8	蒋岑	2	210402193305033549	2			57803112			1		1	20
1360	2013-10-29	9	蒋岑	1	210402195902032930	1			57722036			1		1	20
1362	2013-10-29	10	蒋岑	2	210402194512192942	1			57710998			1		1	1
1363	2015-11-02	17		2	210402194908082926	1								1	12
1364	2013-10-29	11	蒋岑	2	210402193402262925	1			58290949			1		1	10
1365	2013-10-29	12	蒋岑	1	210402195701052214	1		13941391327				1		1	6
1366	2013-11-26	13	蒋岑	2	210402196606172925	1		15842380633				1		1	9
1367	2015-11-02	16	蒋岑	1	210402195701182916	1						1		1	12
1368	2013-10-29	15	蒋岑	2	210402193708252922	1			57804576			1		1	26
1369	2013-10-29	17	蒋岑	2	210402196804182921	1		15242350896				1		1	10
1370	2013-10-29	18	蒋岑	2	210402195702200223	1		13104239770				1		1	3
1371	2013-10-29	19	蒋岑	2	210402194610232960	1		13904134772				1		1	3
1372	2013-10-29	20	蒋岑	1	21040219390525293x	1		13941348621				1		1	7
1373	2013-10-29	21	蒋岑	2	210403195406240024	1			57711080			1		1	6
1374	2015-11-02	15	蒋岑	1	210402193908282915	1						1		1	2
1375	2013-10-29	22	蒋岑	2	210402194806252920	1		13019656177				1		2	0
1376	2013-10-29	23	蒋岑	1	210402195708050916	1		15504937046				1		1	7
1377	2013-10-29	24	蒋岑	1	210402196911174177	1		15640937279				1		1	3
1378	2013-10-29	26	蒋岑	2	210402195304292927	1		13841387234				1		1	10
1379	2015-10-29	14		1	210402192709214114	1						1		1	3
1380	2013-10-29	27	蒋岑	2	210402195204042920	1		13464437390				1		1	13
1381	2013-10-29	28	蒋岑	2	21040219521208176x	1			58125446			1		1	4
1382	2013-11-21	2	蒋岑	2	210402195110042946	1		13009252949				1		1	5
1383	2013-10-30	3	蒋岑	1	210402194112022936	1		13130373255				1		1	6
1384	2013-10-30	4	蒋岑	1	21040219520417291x	1		15566298223	57704223			1		1	6
1385	2013-05-22	5	蒋岑	1	210403196302111855	1		13842344082				1		1	10
1386	2013-10-30	7	蒋岑	1	210402196212230539	1		13941310900				1		1	17
1387	2013-10-30	8	蒋岑	1	210402194403080917	1			57721612			1		1	7
1388	2013-10-30	9	蒋岑	2	210402195007222922	1			57711519			1		1	3
1389	2013-10-30	11	蒋岑	2	21040219460427294x	1		13941355041				1		1	3
1390	2013-10-30	12	蒋岑	1	21040219440310291x	1			58920523			1		1	4
1392	2013-10-30	15	蒋岑	1	210403195610010939	1		15841302116				1		1	5
1393	2013-10-30	16	蒋岑	1	210402195710300937	1		13624132377				1		1	6
1394	2013-10-30	17	蒋岑	2	210402194011230023	1			57716990			1		1	6
1395	2013-10-30	18	蒋岑	1	210402194010162911	1			57117970			1		1	3
1396	2013-10-30	19	蒋岑	2	210402194310243529	1			57708889			1		1	8
1397	2013-10-30	20	蒋岑	2	210402193908222920	1			57723957			1		1	7
1398	2013-10-30	21	蒋岑	2	210402195708024128	1		18642389332				1		1	2
1399	2013-10-30	22	蒋岑	2	210402194309092962	1			58396333			1		1	15
1400	2013-10-30	23	蒋岑	2	210403195007211824	1						1		1	5
1402	2013-10-31	24	谷萍	1	210402195306302914	1			57723834			1		1	6
1403	2013-10-31	25	蒋岑	1	210402500616291	1		15941379262				1		1	8
1404	2013-10-31	26	蒋岑	2	210402195604092927	1		13654134264				1		1	10
1405	2013-10-31	27	蒋岑	2	21040419460419362x	1			58587548			1		1	3
1406	2013-10-31	28	蒋岑	1	210402195210032913	1			57714927			1		1	3
1407	2013-10-31	29	蒋岑	2	210402194902132945	1			57732702			1		2	0
1408	2013-10-31	30	蒋岑	2	210402194801262927	1		13941345041				1		1	5
1409	2013-10-31	31	蒋岑	1	110104196809280814	1		13841394058				1		1	10
1410	2013-10-31	32	蒋岑	1	210403194702090011	1		13354132710				1		1	5
1411	2013-10-31	33	蒋岑	2	21040219590718292x	1		13941305005				1		1	6
1412	2013-10-31	34	蒋岑	2	210402194903172965	1		13130334921				1		1	2
1413	2013-11-01	36	蒋岑	2	210402195111112942	1			57704043			1		1	6
1414	2013-11-01	37	蒋岑	2	210402195408152945	1			57725187			1		1	18
1415	2013-11-01	21	谷萍	2	21040219570405002x	1			57725187			1		1	15
1416	2013-11-01	20	关欣	1	210402196002213538	1		15134127001				1		1	13
1417	2013-11-01	19	谷萍	1	210402195901122918	1		13500431182				1		1	7
1418	2013-11-01	18	闫姣	2	210402195312103540	1		13941359924				1		1	10
1419	2015-10-28	27	蒋岑	2	21041119500930002x	1						1		1	10
1420	2013-11-01	17	谷萍	2	210411196211243000	1		15698939858				1		1	4
1421	2013-11-01	140	杨艺多	1	210402195810300512	1			53891604			1		1	5
1422	2013-11-01	141	杨艺多	1	210403194402042130	1			53890572			1		1	4
1423	2013-11-01	142	杨艺多	2	210402194910130982	1			57720220			1		1	4
1424	2013-11-01	143	杨艺多	2	210402196202274124	1		13942353327				1		1	7
1425	2013-11-01	144	杨艺多	1	210402194209092914	1		13504234641				1		1	2
1426	2013-11-01	145	杨艺多	2	210404194305161249	1		18741310567				1		1	7
1427	2013-11-01	146	杨艺多	2	210403194702020929	1		13941320168				1		1	13
1428	2013-09-29	147	杨艺多	1	210402195311022917	1		15898373342				1		1	10
1429	2013-09-29	148	杨艺多	2	21040219360111292x	1			57701872			1		1	14
1430	2013-09-29	149	杨艺多	2	210403195009041849	1		13504233052				1		1	13
1431	2013-09-29	150	杨艺多	2	210402193410042922	1			57729747			1		1	3
1432	2013-11-21	151	杨艺多	2	21040219380806294x	1		18241340632				1		1	11
1433	2013-09-29	152	杨艺多	1	210402195404020515	1			58129198			1		1	20
1434	2013-09-29	14	蒋岑	1	21040219480603291x	1		13941307961				1		1	2
1435	2013-09-29	15	蒋岑	2	210402194007283560	1		18741393105				1		1	8
1436	2013-11-21	16	蒋岑	1	210402601207291	1		15941319980				1		1	11
1437	2014-09-25	140		2	210402193610042943	1						1		1	27
1438	2013-09-29	17	蒋岑	1	210402195509262932	1		13841334123				1		1	8
1439	2013-09-29	18	蒋岑	2	210402193807080548	1			57112776			1		1	20
1440	2013-09-29	1	关欣	2	210402194602222949	1			57727084			1		1	12
1441	2013-09-30	148	关欣	1	210402194906151520	1			58199309			1		1	6
1443	2013-10-08	152	关欣	2	210402194011124140	1		15841321044				1		1	12
1444	2015-11-02	12	蒋岑	1	210402192903022415	1								1	10
1445	2013-10-08	154	关欣	2	210402193504182440	1			58891357			1		1	10
1446	2013-10-08	155	关欣	1	210402196908083530	1			57716626			1		1	1
1447	2015-11-02	11	蒋岑	2	210402193007160945	1						1		1	10
1448	2013-10-08	30	蒋岑	1	210402195001244119	1			58127196			1		1	7
1449	2013-10-08	19	蒋岑	1	210403196402280031	1						1		1	7
1450	2013-10-08	20	蒋岑	2	210402195601182425	1			53865885			1		2	0
1451	2013-10-08	21	蒋岑	1	210403195601050314	1						1		1	10
1452	2013-11-21	22	蒋岑	2	210402195909204125	2			57714004			1		2	0
1453	2013-11-21	23	蒋岑	2	210404197211050023	99	回	14704131166				1		1	3
1454	2013-10-08	24	蒋岑	2	210402194704062923	1		13204241947				1		2	0
1455	2015-10-29	10	蒋岑	1	210411197108021818	1						1		1	6
1456	2013-10-08	25	蒋岑	2	210402195410122729	1			57114107			1		1	1
1457	2013-10-08	26	蒋岑	1	210402195304242954	1			57728296			1		2	0
1458	2013-10-08	27	蒋岑	1	210402194911262936	1			57713329			1		1	5
1459	2013-10-08	28	蒋岑	1	210403195711101514	1		13841378675				1		1	17
1460	2013-10-08	29	蒋岑	2	210402195210010941	1		15898382112				1		1	5
1461	2013-10-08	66	尹玉峰	2	210402194704282926	1		13354136001				1		1	17
1462	2013-10-09	67	尹玉峰	2	210402195301042981	1		13020346825	57735246			1		1	7
1463	2013-10-09	68	尹玉峰	1	210402195608262911	1		15842382152				1		1	10
1464	2013-10-09	69	尹玉峰	1	21040219560603291x	1		15641331974				1		1	3
1465	2013-11-21	70	尹玉峰	2	210423196312101824	2		13104139697	53896488			1		1	4
1466	2013-10-09	71	尹玉峰	2	21040219550702296x	1		13019656483				1		1	2
1467	2013-11-21	72	尹玉峰	2	210423195903141823	2		13050132400				1		1	3
1468	2013-10-09	73	尹玉峰	1	210402194401240016	1			58292916			1		1	25
1470	2013-10-09	74	尹玉峰	2	210402195104302940	1			53892269			1		1	5
1471	2013-10-09	75	尹玉峰	1	21040219490924291x	1		15004136871				1		1	6
1472	2013-10-09	76	尹玉峰	2	21040219521202292X	1		15641351877				1		1	7
1473	2013-10-09	77	尹玉峰	2	21040219610803292X	1			58125908			1		1	4
1474	2013-10-09	78	尹玉峰	1	210402194711222913	1		13354136001				1		1	8
1475	2013-10-09	79	尹玉峰	2	210404195003080325	1			57190751			1		1	1
1476	2013-10-09	80	尹玉峰	2	230407195009090121	1		13224133599				1		1	2
1477	2013-11-21	81	尹玉峰	2	210402195209242921	2		15898300334				1		1	2
1478	2013-10-09	82	尹玉峰	2	210402193203100245	1			57801530			1		1	6
1479	2013-10-09	83	尹玉峰	1	210403195005202131	1						1		1	25
1480	2013-10-09	84	尹玉峰	1	210402193401022911	1		13050113871				1		1	5
1481	2013-11-21	31	邹媛媛	1	211223195202240239	2		15641324139				1		1	10
1482	2013-10-10	32	邹媛媛	2	210402194402230522	1		13941358433				1		1	19
1483	2013-10-11	33	邹媛媛	2	210402194007242929	1			57736473			1		1	0
1484	2013-10-11	34	邹媛媛	1	210402195306102410	1		13009254915				1		1	4
1485	2013-10-11	121	谷萍	2	210402193612250949	1		18642379883				1		1	9
1486	2013-10-11	122	谷萍	2	210402640608092	1			57704477			1		1	6
1487	2013-10-11	123	谷萍	1	210411331128121	1			57725894			1		1	10
1488	2013-10-11	124	谷萍	2	210402194510232920	1		13904133979				1		1	15
1489	2013-10-11	125	谷萍	2	210402195207281740	1		13842389830				1		1	2
1490	2013-10-11	126	谷萍	1	210402196301153571	1		15841312764				1		1	2
1491	2013-11-21	127	谷萍	1	210402196704083512	99	朝鲜					1		1	11
1492	2013-11-21	128	谷萍	2	21040219480119352X	99	朝鲜					1		1	20
1493	2013-10-11	121	杨艺多	2	210402195802020609	1			57705897			1		1	12
1494	2013-10-11	122	杨艺多	1	210402196008194139	1						1		1	7
1495	2013-10-11	123	杨艺多	2	210402193504273529	1			53864787			1		1	2
1496	2013-10-11	124	杨艺多	2	210402195207042969	1		15040845602				1		1	4
1497	2013-11-21	121	谷萍	2	210411194704260424	99	朝鲜	13214173735				1		1	16
1498	2013-10-11	122	谷萍	2	210402195003202924	1			57705066			1		1	21
1499	2013-10-11	123	谷萍	1	210402195605100511	1		13504234005				1		1	20
1500	2013-10-11	124	谷萍	1	210402197606202914	1		13941311790				1		1	2
1501	2013-10-11	121	谷萍	2	210402193601032727	1			58290636			1		1	5
1502	2013-10-11	122	谷萍	1	210402195308093554	1		13624231015				1		1	13
1503	2013-10-11	123	谷萍	2	210402195303171760	1			57722392			1		1	3
1504	2013-10-11	124	谷萍	2	210402195307282927	1		13898340114				1		1	0
1505	2013-10-11	125	谷萍	1	210402196212043012	1		13050195429				1		1	7
1506	2013-10-11	126	谷萍	1	210402194305293513	1			53891227			1		1	8
1507	2013-11-26	127	谷萍	1	210402195112223556	1			57802576			1		1	6
1508	2013-10-11	128	谷萍	2	210411193305140420	1		13372843463				1		1	12
1509	2013-10-11	129	谷萍	2	210402194808142928	1		13332120618				1		1	5
1510	2013-10-11	130	谷萍	1	210402194201173517	1		13009262369				1		1	5
1511	2013-10-11	131	谷萍	2	21040319600823212x	1		13204259368				1		1	1
1512	2013-10-11	132	谷萍	2	210402195206230263	1		15842353112				1		1	11
1513	2013-10-11	133	谷萍	1	21040219540602291x	1		13842388826				1		1	9
1514	2013-10-11	134	谷萍	2	210402195305043527	1			53893319			1		1	1
1515	2013-11-21	135	谷萍	2	210402194808272044	2		13654139360				1		1	7
1516	2013-10-11	136	谷萍	2	210402196010130046	1		13604139399				1		1	3
1517	2013-10-11	137	谷萍	2	210402194112132940	1			57855858			1		1	10
1518	2013-10-12	138	谷萍	1	410311195403152012	1		15841310804				1		1	2
1519	2013-10-12	139	谷萍	1	210402196108062918	1		15242391936				1		1	14
1520	2013-10-12	140	谷萍	2	210403561204032	1		15841309642				1		1	5
1521	2013-10-14	125	谷萍	1	210404195612153614	1		15641307458				1		1	1
1522	2013-10-14	126	谷萍	1	21040219411202291x	1		15842307072				1		1	7
1523	2013-11-21	127	谷萍	2	370827194410220029	99	回		53865825			1		1	7
1524	2013-10-14	128	谷萍	2	210402195712052025	1			58293805			1		1	3
1525	2013-10-14	129	谷萍	1	210402195905182934	1		13470595922				1		1	4
1526	2013-10-14	130	谷萍	1	210402195802012959	1		13804134322				1		1	0
1527	2013-10-14	131	谷萍	2	210411195812182966	1		13842321714				1		1	4
1528	2013-10-14	132	谷萍	1	210411195812182966	1			57700753			1		1	7
1529	2013-10-14	133	谷萍	2	210402195209162024	1			57700753			1		1	12
1530	2013-10-14	134	谷萍	2	210402195306040221	1		13941385519	57706419			1		1	10
1531	2013-10-14	135	谷萍	2	210404193502240021	1		18741371910				1		1	10
1533	2013-10-14	136	谷萍	2	210402193904192920	1		13204250368				1		1	5
1534	2013-10-14	137	谷萍	2	210402193708032946	1		13204250368				1		1	1
1535	2013-10-14	138	谷萍	2	210402194511234127	1			58127771			1		1	8
1536	2013-10-14	139	谷萍	2	210403195107151822	1		13204259368				1		1	2
1537	2013-10-14	156	谷萍	1	210404195410041219	1		15641371646				1		1	2
1538	2013-10-14	157	谷萍	1	210402194707032914	1		18741351931	58307933			1		1	1
1539	2013-10-12	143	谷萍	2	210402195404112962	1		13104130162				1		1	4
1540	2013-10-14	159	谷萍	1	210402193809080533	1			57736913			1		1	1
1541	2013-11-21	160	杨艺多	1	210402195702032936	2		13050105418				1		1	3
1542	2013-11-21	161	杨艺多	1	210402196301062717	2		13842395971				1		1	5
1543	2013-10-14	162	杨艺多	1	210402196305193511	1			57711996			1		1	1
1544	2013-10-14	163	杨艺多	1	210402194408302910	1			57729075			1		1	17
1545	2013-10-14	164	杨艺多	1	210402195710162933	1		13188299588				1		1	1
1546	2013-10-14	165	杨艺多	1	21040419530213301x	1			57708997			1		1	11
1547	2013-10-14	166	杨艺多	1	21040219720416293x	1		13842326934				1		1	6
1548	2013-10-14	167	杨艺多	2	210402193503282941	1						1		1	4
1549	2013-10-14	168	杨艺多	2	21040219460629152x	1		15242397979				1		1	8
1550	2013-10-14	169	杨艺多	2	21040219340222294x	1		15841338618				1		1	20
1551	2013-10-14	170	杨艺多	2	210402193405102986	1		18741335092				1		1	4
1552	2013-10-14	171	杨艺多	1	210404195611111279	1			53866634			1		1	3
1553	2013-10-14	172	杨艺多	2	210404194707241225	1			58117189			1		1	7
1554	2013-10-14	173	杨艺多	1	210402194601282915	1			57703681			1		1	7
1555	2013-10-14	175	杨艺多	2	210402194411050021	1		15641331066				1		1	15
1556	2013-10-14	176	杨艺多	2	210404193501171829	1		13841376066				1		1	20
1557	2013-10-14	177	杨艺多	2	210402196107082941	1		15898340252				1		1	6
1558	2013-10-14	178	杨艺多	1	210402194604193512	1			53896345			1		1	21
1559	2013-10-14	179	杨艺多	1	210403193912093312	1			57710710			1		1	2
1560	2013-10-14	180	杨艺多	1	210402196301153598	1			57716109			1		1	14
1561	2013-10-15	181	谷萍	1	210402195006173516	1		13841372648				1		1	5
1562	2013-10-15	182	谷萍	2	210403195002163341	1			58117817			1		1	2
1563	2013-10-15	183	谷萍	1	210403195111283350	1		15698947852				1		1	1
1564	2013-10-15	184	谷萍	1	210402195308112911	1		13050104500				1		1	14
1565	2013-10-15	185	谷萍	1	210402195002222018	1		13841367640				1		1	1
1566	2013-10-15	186	谷萍	2	21040219450512292x	1		13050188230				1		1	3
1567	2013-10-15	187	谷萍	1	210402195401230517	1		13500434262				1		1	0
1568	2013-10-15	121	谷萍	1	150403194812240010	1			58249418			1		1	10
1569	2013-10-15	122	谷萍	1	21040219401108357x	1			57714607			1		1	10
1570	2013-10-15	123	谷萍	2	210404195303263326	1			53896136			1		1	6
1571	2013-10-15	124	谷萍	1	210402580315151	1		13804230291				1		1	7
1572	2013-10-15	125	谷萍	1	210402194009032917	1			58119056			1		1	10
1573	2013-10-15	126	谷萍	1	210402195408312013	1		13804133938				1		1	17
1574	2013-10-15	127	谷萍	2	210402192711294125	1		18741321264				1		1	2
1575	2013-10-15	128	谷萍	2	210402571105296	1			57736882			1		1	1
1576	2013-10-15	129	谷萍	2	210403491207182	1		13898335956				1		1	1
1577	2013-10-15	130	谷萍	2	210403195702212124	1		13470569394				1		1	6
1578	2013-11-21	131	谷萍	2	210423194402223228	2			57573931			1		1	2
1579	2013-10-15	132	谷萍	2	21040219490610022x	1			57704812			1		1	5
1580	2013-10-15	133	谷萍	1	210402195401050970	1		15941340309				1		1	6
1581	2013-10-16	134	谷萍	1	210402196405062957	1		15566298082				1		1	1
1582	2013-10-16	135	谷萍	2	210411194812072922	1			53865007			1		1	5
1583	2013-10-16	136	谷萍	1	210402197107102935	1		15134137345				1		1	0
1584	2013-10-16	137	谷萍	1	210402195310162213	1		15134137345				1		1	7
1585	2013-10-16	138	谷萍	2	210402195508232424	1			57190838			1		1	1
1586	2013-10-16	139	谷萍	2	210402341005094	1			58119680			1		1	17
1587	2013-10-16	140	谷萍	2	210402195812141527	1			53865608			1		1	5
1588	2013-10-16	141	谷萍	1	210402195610232914	1		13700130853				1		1	12
1589	2013-10-16	142	谷萍	1	211011195008025512	1		13224130766				1		1	6
1590	2013-10-16	143	谷萍	2	210402194002140229	1			58933920			1		1	2
1591	2013-10-16	144	谷萍	2	210402195802172944	1						1		1	2
1592	2013-10-16	145	谷萍	1	210402196203044179	1		13942359859				1		1	15
1593	2013-10-16	146	谷萍	1	210402195605022939	1		13500437458				1		1	10
1594	2013-10-16	147	谷萍	2	210403194405083341	1			58126239			1		1	0
1595	2013-10-16	148	谷萍	2	210402194601090040	1			52436071			1		1	15
1596	2013-10-16	149	谷萍	2	210421196804150240	1						1		1	12
1597	2013-10-16	150	谷萍	1	210402194704212119	1			58831699			1		1	12
1598	2013-10-16	151	谷萍	2	210402194301104121	1		13372844476				1		1	3
1599	2013-10-16	152	谷萍	1	210411196102250412	1						1		1	5
1600	2013-11-21	153	谷萍	1	210404196605120317	1		15141374624				1		1	12
1601	2013-10-17	154	谷萍	2	210404196201180321	1		15604132797				1		1	0
1602	2013-10-17	155	谷萍	2	210404195410090627	1		15668543456				1		1	12
1603	2015-10-29	9	蒋岑	2	210402193802144207	1		15641340909				1		1	4
1604	2013-10-17	156	谷萍	1	210402194003062912	1		15842342992				1		1	5
1605	2013-10-17	157	谷萍	2	210403195703070025	1		18841314368				1		1	7
1606	2013-10-17	158	谷萍	2	210402195108112220	1			57136851			1		1	3
1607	2013-10-17	159	谷萍	2	210402195902281769	1						1		1	13
1608	2013-10-17	160	谷萍	2	210402194208130923	1						1		1	3
1609	2013-10-17	161	谷萍	2	21040319511213092x	1		13841311655				1		1	3
1610	2013-10-17	162	谷萍	1	210403195208280930	1		13841311655				1		1	7
1611	2013-10-17	163	谷萍	2	210402194906150526	1			57316850			1		1	4
1612	2013-10-17	164	谷萍	1	210402195510162912	1			57103776			1		1	4
1613	2013-10-17	165	谷萍	2	210402193911100940	1		13050174262				1		1	13
1614	2013-10-17	166	谷萍	2	210402195806050944	1		13050174262				1		1	8
1615	2013-10-17	167	谷萍	2	210402193812092420	1		15841330292				1		1	3
1616	2013-10-17	168	谷萍	2	210402195210010925	1			58831816			1		1	21
1617	2013-10-17	169	谷萍	2	210402195208302945	1		15241343383				1		1	11
1618	2013-10-17	170	谷萍	2	21040219470721294x	1			57726310			1		1	7
1619	2013-10-17	171	谷萍	2	210402194010283529	1			53865351			1		1	10
1620	2013-11-26	172	谷萍	2	210411193804132927	1			57710656			1		1	3
1621	2013-10-17	173	杨艺多	1	210402194207113574	1			58128621			1		1	1
1622	2013-11-21	11	蒋岑	1	210402194301153513	2		18841348440				1		1	20
1623	2013-11-21	174	杨艺多	1	210402194207072936	1		13390439075				1		1	6
1624	2013-10-17	175	杨艺多	2	210403194412200921	1			57707659			1		1	3
1625	2013-10-17	176	杨艺多	2	210402194207131545	1		15841326892				1		1	18
1626	2013-11-21	177	杨艺多	1	210411195302261234	2		13904938948				1		1	17
1627	2013-10-17	178	杨艺多	2	210404193706010041	1		15898325020				1		1	8
1628	2013-10-17	179	杨艺多	2	210402193612161743	1			52908226			1		1	1
1629	2013-10-17	137	杨艺多	2	210402194312292949	1			58307681			1		1	1
1630	2013-10-17	138	杨艺多	2	210402196203052988	1		13364231962				1		1	1
1631	2013-10-17	139	杨艺多	2	210402193811220224	1			57736153			1		1	15
1632	2013-10-17	140	杨艺多	2	210402195704152982	1		13842338823				1		1	11
1633	2013-10-17	141	杨艺多	1	210402194911072913	1		13050174262				1		1	3
1634	2013-10-17	142	杨艺多	2	210402193706071722	1			53893304			1		1	4
1635	2013-10-17	143	杨艺多	2	210402194510292923	1		13942383544				1		1	2
1636	2013-10-17	144	杨艺多	1	211011194106135518	1		13804133716	52365236			1		1	17
1637	2013-10-17	145	杨艺多	1	211011193402199554	1			57801544			1		1	17
1638	2013-10-17	146	杨艺多	1	210402195210241539	1			57707753			1		1	18
1639	2013-10-17	147	杨艺多	2	210403193802113028	1		15941365408				1		1	10
1640	2013-10-17	148	杨艺多	2	210402193711092923	1		13942301091	58137999			1		2	0
1641	2013-10-18	134	谷萍	2	210411195710150824	1		15931656637				1		1	3
1642	2013-10-18	135	谷萍	1	210402194806102930	1			57732399			1		1	20
1643	2013-10-18	136	谷萍	1	210402196607022910	1		13804136400				1		1	3
1644	2013-10-18	137	谷萍	2	21041119461112292x	1			57702002			1		1	8
1645	2013-10-18	138	谷萍	2	210404194809223044	1		15042353584				1		1	6
1646	2013-10-18	139	谷萍	1	210402194212302935	1			57700198			1		1	8
1647	2013-10-18	140	谷萍	1	210402194304212013	1			52341282			1		1	1
1648	2013-10-18	141	谷萍	1	210402196611072232	1		13804232166				1		1	2
1649	2013-10-18	142	谷萍	2	210421193911140220	1			57728081			1		1	8
1650	2013-10-18	143	谷萍	2	210402195806203541	1		15941372664	53875721			1		1	5
1651	2013-11-26	121	杨艺多	2	210403194212020328	1		13704138774				1		1	15
1652	2013-11-21	145	杨艺多	1	210402194911220015	1			58129732			1		1	6
1653	2013-11-21	146	杨艺多	1	210402193805172916	99	回	13941333660	58589336			1		1	2
1654	2013-11-21	147	杨艺多	2	210422194805212922	2						1		1	3
1655	2013-10-18	148	杨艺多	2	21040219650805356x	1		14741260234				1		1	9
1656	2013-11-21	149	杨艺多	1	210402195607314118	1			58284809			1		1	17
1657	2013-11-21	150	杨艺多	2	210402193808180946	1			57726180			1		1	16
1658	2013-11-21	151	杨艺多	2	21040219550631202X	1			58305648			1		1	1
1659	2013-11-21	152	杨艺多	2	21040219560301242X	1		15898301760				1		1	8
1660	2013-11-21	153	杨艺多	2	210402194811060229	1		15841342266	57801717			1		1	9
1661	2013-11-21	149	杨艺多	2	210402195111202921	1			58126538	顺城区辉南路9-2号楼3单元405号		1		1	2
1662	2013-09-12	150	杨艺多	2	210404195503301825	1		13942314581				1		1	3
1663	2013-11-21	151	杨艺多	1	210402195306133516	1			57711692			1		1	18
1664	2013-11-21	152	杨艺多	2	220381198005230422	1		15841304529				1		1	1
1665	2013-11-21	153	杨艺多	1	210411196612160011	1		15141307959	58306297			1		1	2
1666	2013-11-21	154	杨艺多	2	210411194810120222	2		13504234432				1		1	8
1667	2013-09-12	155	杨艺多	2	210402195612210022	1			57382933			1		1	3
1668	2013-11-21	156	杨艺多	2	210402196311232986	1		15041353146				1		1	5
1669	2013-09-13	157	杨艺多	2	210402194710242023	1			57717605			1		1	6
1670	2013-09-13	158	杨艺多	2	210402194103102926	1		15724697368				1		1	11
1672	2013-11-21	160	杨艺多	1	21040219490917411X	1			52908251			1		1	5
1673	2013-09-13	161	杨艺多	1	210402195403202915	1		13591555252				1		1	10
1674	2013-09-13	162	杨艺多	2	210402195710171768	1			57331255			1		1	10
1675	2013-09-13	163	杨艺多	2	150403195607070029	1			53896863			1		1	3
1676	2013-09-13	164	杨艺多	1	210402196010212957	1			57733843			1		1	18
1677	2013-09-13	147	杨艺多	2	210402193106102927	1			57727292			1		1	9
1678	2013-09-13	166	杨艺多	1	210402195805280959	1		13842359822				1		1	7
1679	2013-09-13	167	杨艺多	2	21040219471001352x	1		15842300958				1		1	4
1680	2013-09-13	168	杨艺多	1	210402196010102934	1		15141348935				1		1	5
1681	2013-09-13	154	杨艺多	1	210411195003010419	1						1		1	12
1682	2013-09-13	152	谷萍	2	210404196606051229	1			57732998			1		2	0
1684	2013-09-13	153	谷萍	1	21040419501025301x	1			57701213			1		1	10
1685	2013-09-13	154	谷萍	1	21040219520108173x	1		13804931555				1		1	1
1686	2013-11-21	155	谷萍	1	210403195709130914	1		15694130331				1		1	18
1687	2013-11-26	156	谷萍	1	210402195107012957	1		13030706125				1		1	20
1688	2013-09-13	157	谷萍	2	210402194510151522	1			57113995			1		1	15
1689	2013-09-13	158	谷萍	1	210402195007290212	1			56636706			1		1	10
1691	2013-09-13	160	谷萍	2	21040219330609292x	1						1		1	5
1692	2013-09-13	161	谷萍	2	210411193709110228	1						1		1	20
1693	2013-09-16	162	谷萍	2	210411195202190440	1						1		1	0
1694	2013-09-16	163	谷萍	2	210402193801094148	1						1		1	8
1695	2013-09-16	164	谷萍	1	210403194912053331	1		18940391279				1		1	4
1696	2013-09-16	165	谷萍	2	21040219620415242x	1		15042381677				1		1	12
1697	2013-09-16	166	谷萍	1	210403193912172715	1			58967717			1		1	5
1698	2013-11-26	167	谷萍	2	210404194911200623	1		57191018	57389349			1		1	3
1699	2013-09-16	168	谷萍	2	210402195701152928	1		15842360134				1		1	5
1700	2013-09-16	169	谷萍	2	210404195310151226	1			57191540			1		1	10
1701	2013-09-16	170	杨艺多	1	210402194204042918	1		15641330425				1		1	4
1702	2013-09-16	171	杨艺多	2	210411196307040427	1		13904236455				1		1	10
1703	2013-09-16	172	杨艺多	2	210402196103133000	1			57199908			1		1	4
1704	2013-09-16	173	杨艺多	1	210402195803012475	1		13591549958				1		1	8
1705	2013-09-16	174	杨艺多	2	210421195301091221	1		13019662765				1		1	7
1706	2013-09-16	175	杨艺多	2	21040219510503292x	1		15042375531				1		1	20
1707	2013-11-26	176	杨艺多	2	210403194907143025	1		13394130181				1		1	14
1708	2013-09-16	177	杨艺多	2	210403195908214221	1		13504135051				1		1	4
1709	2013-09-16	178	杨艺多	1	210402194403140019	1			53835036			1		1	3
1710	2013-09-16	179	杨艺多	2	21040219450625414x	1			57732976			1		1	15
1711	2013-09-16	180	杨艺多	1	210404195107193033	1		13470558946				1		1	7
1712	2013-09-16	181	杨艺多	2	210402194210034148	1			57191057			1		1	8
1713	2013-09-16	182	杨艺多	1	210402195007200512	1		15104137974				1		1	20
1714	2013-09-16	183	杨艺多	2	21040219570224412x	1			57190953			1		1	4
1715	2013-11-21	184	杨艺多	2	210402194402162427	2		13654132132				1		1	12
1716	2013-09-16	185	杨艺多	2	210411195206043528	1		13050101186				1		1	0
1717	2013-09-16	186	杨艺多	1	210402194201022911	1						1		1	13
1718	2013-09-16	187	杨艺多	2	210402196512162945	1		13942328950				1		1	5
1719	2013-09-17	122	杨艺多	2	210403195609061843	1			57191208			1		1	9
1720	2013-09-17	123	杨艺多	1	210402610109171	1		13904235605				1		1	5
1721	2013-09-17	124	杨艺多	2	210402196202071722	1		13904235605				1		1	1
1722	2013-09-17	125	杨艺多	2	210402193901192925	1		15042382082				1		1	1
1723	2013-09-17	126	杨艺多	1	210403195710112115	1			57732447			1		1	12
1724	2013-09-17	127	杨艺多	1	210402197202202934	1			53891826			1		1	3
1725	2013-09-17	128	杨艺多	2	210402194210172428	1			57732587			1		1	1
1726	2013-09-17	129	杨艺多	2	210404430329242	1		15842300820				1		1	0
1727	2013-09-17	130	杨艺多	2	210402195508102945	1		15841397734				1		1	0
1728	2013-09-17	131	杨艺多	1	210402194910092912	1			57756577			1		1	5
1729	2013-09-17	132	杨艺多	1	210404194903270613	1			57734255			1		1	10
1730	2013-11-21	133	杨艺多	2	210403196101272740	99	回	13841310803				1		1	14
1731	2013-09-17	134	杨艺多	2	210402193612172928	1		15724681363				1		1	4
1732	2013-09-17	135	杨艺多	2	210402630616356	1						1		1	11
1733	2013-09-17	136	杨艺多	1	210402195011084112	1		15241319052				1		1	23
1734	2013-11-26	137	杨艺多	1	210402195402182915	1			57722801			1		1	0
1735	2013-09-17	138	杨艺多	2	21040219570618294x	1		13304231564				1		1	1
1736	2013-09-17	139	杨艺多	1	210403195503100912	1		13704135772				1		1	8
1737	2013-09-17	140	杨艺多	2	210402195807112924	1		15604234282				1		1	13
1738	2013-09-17	141	杨艺多	1	210402195912212919	1		15604234282				1		1	1
1739	2013-09-17	142	杨艺多	2	210402196009212028	1			57734178			1		1	3
1740	2013-09-17	143	杨艺多	1	372425195503285130	1			57702384			1		1	1
1741	2013-09-18	144	杨艺多	2	210402194612202925	1						1		1	3
1742	2013-09-18	145	杨艺多	2	210403196803183320	1		13904135754				1		1	2
1743	2013-09-18	146	杨艺多	1	210403194212220311	1			57704413			1		1	30
1744	2013-09-18	147	杨艺多	2	210421196302030027	1		13942353046				1		1	3
1745	2013-11-26	148	杨艺多	2	210403194403181546	1		13009240869				1		1	3
1746	2013-09-18	149	杨艺多	1	210402361019411	1			58127757			1		1	8
1747	2013-09-18	150	杨艺多	2	210402194603092920	1			57703594			1		1	10
1748	2013-09-18	151	杨艺多	2	640202194504111523	1			57736971			1		1	14
1749	2013-09-18	152	杨艺多	2	210402193712100921	1			57701726			1		1	5
1750	2013-09-18	153	杨艺多	2	210402196308162446	1		13591539170				1		1	14
1751	2013-09-18	154	杨艺多	2	210402196003242445	1		13942356504				1		1	0
1752	2013-09-18	155	杨艺多	1	210402541109293	1			57724681			1		1	0
1753	2013-11-26	156	杨艺多	1	210402194912262954	2		15714135184				1		1	4
1754	2013-09-18	157	杨艺多	2	210402196104042928	1		13050182573				1		1	17
1755	2013-09-18	158	杨艺多	2	210402194504052720	1		15842350211				1		1	13
1756	2013-09-18	159	杨艺多	1	210402196803302979	1		13898326512				1		1	4
1758	2013-09-18	161	杨艺多	1	210402194210104118	1		13842347734	58129388			1		1	10
1759	2013-09-18	162	杨艺多	2	210402194412014129	1			58129388			1		1	13
1760	2013-09-18	163	杨艺多	2	210402194107170248	1			57720274			1		1	8
1761	2015-11-02	7	蒋岑	1	210402196309162915	1								1	5
1762	2013-09-18	164	谷萍	2	210402193112170547	1			53830646			1		1	9
1763	2013-09-18	165	谷萍	2	210402194411192927	1						1		1	3
1764	2013-11-26	166	谷萍	2	210402194409292929	1			53866006			1		1	16
1765	2013-09-22	167	谷萍	2	210402195903193525	1		13941339142				1		1	5
1766	2013-11-26	168	谷萍	1	21040219580422295x	1		18841324292				1		1	7
1767	2013-11-26	169	谷萍	1	210402195612172011	1		15004139794				1		1	0
1768	2013-09-22	170	谷萍	2	210402197510112949	1		15241326604				1		1	5
1769	2013-09-22	171	谷萍	1	210402194806222959	1		13842384396				1		1	7
1770	2013-11-26	201	杨艺多	1	210402196501212935	1		15042382480				1		1	4
1771	2013-11-26	121	尹玉峰	1	210402195205242916	1		13470578483				1		1	2
1772	2013-09-22	174	谷萍	1	21040219530301241x	1		15941308144				1		1	3
1773	2013-11-26	175	谷萍	1	210402194612261757	1			57199199			1		1	12
1774	2013-11-26	176	谷萍	2	210402195411192948	1		15242705592				1		1	7
1775	2013-09-22	177	谷萍	2	210402195809302967	1		13842353596				1		1	3
1776	2013-09-22	178	谷萍	1	210402194709020917	1			57724665			1		1	7
1777	2013-09-22	179	谷萍	1	210402197705102716	1		13188290787				1		1	1
1778	2013-09-22	180	谷萍	2	210402195703132963	1		15242304315				1		1	3
1779	2013-09-22	181	谷萍	2	210402195504222042	1		15898384668				1		1	5
1780	2013-09-22	182	谷萍	1	210402193603032931	1			57726150			1		1	3
1781	2013-09-23	183	杨艺多	2	210402193805112921	1			57721703			1		1	10
1782	2013-09-23	184	杨艺多	2	210404193806290028	1			58126368			1		1	8
1783	2013-09-23	185	杨艺多	2	210404194601260022	1		15566437050				1		1	9
1784	2013-09-23	186	杨艺多	1	210404194102280010	1			53891117			1		1	3
1785	2013-11-21	187	杨艺多	2	210404194206080021	1			53891117			1		1	4
1786	2013-09-23	124	杨艺多	2	210402195506092966	1			57800897			1		1	10
1787	2013-09-23	125	杨艺多	2	210403194707270628	1			57727149			1		1	15
1788	2013-09-23	126	杨艺多	1	210402194702242939	1		13342129107				1		1	13
1789	2013-09-23	127	杨艺多	1	210402195610124112	1		15641379814				1		1	6
1790	2013-09-23	128	杨艺多	1	210402194208022930	1			53891204			1		1	1
1791	2013-09-23	129	杨艺多	1	210402194701132914	1		13942345715				1		1	15
1792	2013-09-23	130	杨艺多	1	210402195408043538	1		13842365946	57700311			1		1	1
1793	2013-09-23	131	杨艺多	2	210402195007172945	1		15842318765				1		1	8
1794	2013-09-23	132	杨艺多	2	210402195708162985	1		13204242528				1		1	0
1795	2013-11-29	133	杨艺多	2	210421194901231246	2		15842318765				1		1	10
1796	2013-09-23	134	杨艺多	1	210411196403250416	1		13081342910				1		1	3
1797	2013-11-21	135	杨艺多	1	210402193101182913	2		15714239700				1		1	8
1798	2013-09-23	136	杨艺多	1	210403193712240015	1			58117996			1		1	1
1799	2013-09-23	137	杨艺多	1	210404195908270318	1		13130302708	57727012			1		1	8
1800	2013-09-23	138	杨艺多	1	210402195211032915	1		13009241112				1		1	8
1801	2013-11-21	139	杨艺多	1	210402196008020219	2		15841343368				1		1	14
1802	2013-09-23	140	何欣	1	210402195408062915	1			57709633			1		1	6
1803	2013-09-24	141	邹媛媛	2	210403194608122128	1			57709006			1		1	1
1804	2013-09-23	142	邹媛媛	2	210402194402201721	1			57731666			1		1	1
1805	2013-09-23	143	何欣	2	210402196210264161	1						1		1	1
1806	2013-09-23	144	邹媛媛	2	210402196404100309	1						1		1	9
1807	2013-09-23	148	杨艺多	2	210402195809082941	1		18741305182				1		1	7
1808	2013-09-23	149	杨艺多	2	21040219361021352x	1			57199066			1		1	8
1809	2013-09-24	150	杨艺多	2	210411195906301428	1		13030710457				1		1	4
1810	2013-09-23	151	杨艺多	1	210404194812030315	1			58119007			1		1	0
1811	2013-11-21	152	杨艺多	1	210402197212092476	1		15641329366				1		1	3
1812	2013-09-24	1	何欣	1	210402196012051755	1		15042385223				1		1	7
1813	2013-11-21	2	何欣	1	210402195211283538	1		15941305515				1		1	20
1814	2013-09-24	3	何欣	1	210402196104140018	1						1		1	10
1815	2013-09-24	4	何欣	2	210411194603070023	1			58127706			1		1	16
1816	2013-09-24	5	何欣	1	210403195205130312	1			57702800			1		1	3
1817	2013-09-24	10	何欣	1	210402194611151513	1			58127185			1		1	5
1818	2013-09-24	6	杨艺多	1	210402194708152977	1			53891785			1		1	0
1819	2013-11-21	7	杨艺多	1	210422195911100216	2		15541375008				1		1	0
1820	2013-09-24	8	杨艺多	1	21040219490211291x	1		18741348832				1		1	13
1821	2013-11-21	1	谷萍	2	210402195210223525	2		18904235553				1		1	9
1822	2013-09-25	2	谷萍	2	210402194901202921	1		18741348832				1		1	12
1823	2013-09-25	3	谷萍	1	210403196602213917	1		13941327709				1		1	8
1824	2013-11-21	4	谷萍	2	210402195507140069	99	锡伯					1		1	5
1825	2013-09-25	10	蒋岑	2	21040219430406054x	1			57733357			1		1	9
1826	2013-11-26	5	谷萍201305	2	210404193901272426	1						1		1	15
1827	2015-11-02	4	蒋岑	1	210404196303290636	1								1	5
1828	2013-09-25	6	谷萍	1	210404195010171217	1		15941302088				1		1	2
1829	2013-09-25	7	谷萍	1	210402195110054111	1		13904236424				1		1	5
1830	2013-09-25	8	谷萍	1	210402197710044119	1						1		1	4
1831	2013-09-25	9	谷萍	1	210402195205290555	1		13134139588	53864418			1		1	5
1832	2013-09-25	10	谷萍	2	210404460401362	1			58019267			1		1	20
1833	2013-09-29	1	谷萍	2	210402194911240569	1			57713127			1		1	13
1834	2013-09-25	2	谷萍	2	210402194603253544	1		18940315431	57713788			1		1	3
1835	2013-11-21	3	谷萍	2	210402194803140229	2			57713577			1		1	3
1836	2013-09-25	4	谷萍	2	210402193808142982	1						1		1	11
1837	2013-09-25	5	谷萍	1	210402194803162014	1		13898330300				1		1	12
1838	2013-11-21	7	谷萍	1	210403194206250012	1		13188260569				1		1	10
1839	2013-09-26	8	谷萍	2	210402195712284168	1		15241339581				1		1	3
1840	2013-09-26	9	谷萍	1	210402194908202019	1						1		1	15
1841	2013-09-26	11	杨艺多	2	210402195007262027	1						1		1	4
1842	2013-09-26	12	杨艺多	1	210402195402022939	1		15042368671				1		1	1
1843	2013-09-26	13	杨艺多	2	210402195211212924	1		13322139202				1		1	15
1844	2013-09-29	162	杨艺多	2	210404195011213028	1		15041371192				1		1	3
1845	2013-09-26	163	杨艺多	2	210403194810220629	1		15641314014				1		1	4
1847	2013-09-26	165	杨艺多	2	210402196210252945	1		13624234596				1		1	20
1848	2013-09-26	166	杨艺多	2	21040219520731002x	1			57715856			1		1	7
1849	2013-09-26	167	杨艺多	1	210402194310153531	1		13130313824	57704346			1		1	1
1850	2013-09-26	168	杨艺多	2	210402195809271726	1		15841308650	57720996			1		1	10
1851	2013-09-26	169	杨艺多	2	210402195810282449	1		13898336965				1		1	8
1852	2013-09-26	170	杨艺多	1	210402331209353	1			57726707			1		1	6
1853	2013-09-26	171	杨艺多	1	210404194208311233	1			58199548			1		1	1
1854	2013-09-26	172	杨艺多	2	210402196101262925	1		13470531476				1		1	1
1855	2013-11-26	173	杨艺多	1	210403196009264238	1		15641388106	57714171			1		1	6
1856	2013-09-26	174	杨艺多	2	210402194907122965	1		15841380102				1		1	5
1857	2013-09-26	175	杨艺多	1	210402194712022913	1		15841380102				1		1	5
1858	2013-11-21	176	杨艺多	1	21040219490626171x	1			57723799			1		1	5
1859	2013-11-21	177	杨艺多	1	210404430509063	1			57721519			1		1	5
1861	2013-09-27	9	谷萍	1	210403194404023312	1		18741327244				1		1	1
1862	2013-09-29	11	谷萍	1	210402196301060914	1		13604139116				1		1	2
1863	2013-09-29	12	谷萍	2	210402195111072928	1			58293393			1		1	0
1864	2013-11-21	13	谷萍	2	210402195009132947	1		15841377071				1		1	9
1865	2013-09-29	14	谷萍	1	210403195101133017	1		13941389228				1		1	2
1866	2013-09-29	154	谷萍	1	210403195103281814	1		13050125639				1		1	0
1867	2013-09-29	155	谷萍	1	210403195201090018	1		13941369175				1		1	3
1868	2013-09-29	156	谷萍	2	210402193707191726	1		15698936529				1		1	6
1869	2013-09-29	157	谷萍	1	210402194701092916	1		13904138787				1		1	4
1870	2013-09-29	158	谷萍	2	210402194806041728	1		18741378251				1		1	2
1871	2013-09-29	159	谷萍	2	210402194005012943	1		15041395240				1		1	7
1872	2013-11-21	160	谷萍	2	210402194901280241	1			57714304			1		1	2
1873	2013-09-29	161	谷萍	2	210402195611232967	1		15941380657				1		1	5
1874	2013-11-21	162	谷萍	1	210411193701071017	2			57711802			1		1	5
1875	2013-09-29	13	蒋岑	2	210402196110042983	1		13050110611				1		1	3
1876	2013-11-21	14	蒋岑	2	210402194504103524	99	回	18841348440				1		1	3
1877	2015-10-28	30	蒋岑	1	210403195004053314	1								1	8
1879	2014-07-29	1	蒋岑	1	210411196310180818	1		13842342912				1		1	13
1880	2014-07-29	2	蒋岑	2	210402195111012925	1		15241332732				1		1	6
1881	2014-07-29	3	蒋岑	2	210402196005101769	1		13941376591				1		1	10
1882	2014-07-31	4	蒋岑	2	210402194411112923	1		15841368896				1		1	1
1883	2014-07-31	5	蒋岑	2	210402195002112923	1		15941384152				1		1	23
1884	2015-10-27	16	蒋岑	2	210402196305123003	1								1	7
1885	2014-07-31	6	蒋岑	2	210402193805204121	1		1824237651	58129298			1		1	1
[truncated: 161 more rows]
